# Supplementary material for: Integrative metabolomic and transcriptomic analyses reveal the mechanisms of Tibetan hulless barley grain coloration
Source: Front Plant Sci. 2022 Oct 25;13:1038625. doi: 10.3389/fpls.2022.1038625 (PMC9641248; doi:10.3389/fpls.2022.1038625)
Supplement: Supplementary file 9 [file DataSheet_1.xlsx]

## Sheet: Supplementary Table 1
Supplementary Table 1. Primers used in this study.
Gene name	Gene ID	Forward Primer 5'-3'	Reverse Primer 5'-3'	Purpose
HOVUSG0908700	PAL (Phenylalanine ammonia-lyase)	CAGCATAACCAAGATGTC	GCTTCAGTATGTCAATGG	qRT-PCR
HOVUSG0586400	C4H (cinnamate 4-hydroxylase)	AAAGGAAGGGCGAGATCAA	CACAGCGTCGTCTCAATG	qRT-PCR
HOVUSG4205000	4CL (4-coumarate: CoA ligase)	ATGACCGAGGACGAGATC	GCTCACGAAGAAGACCTT	qRT-PCR
HOVUSG1229700	CHS(Chalcone synthase)	CGACTACTACTTCAAGAT	CATATACCTCTTCCTGAT	qRT-PCR
HOVUSG0847500	CHI (chalcone isomerase)	CGAGTTCGAGAAGTTCAC	GTTCTCCGTCACCTTGTC	qRT-PCR
HOVUSG4495000	HvF3H (flavanone 3-hydroxylase)	GAACTCATCAAGGATACC	TTAAGCACACCTACTCTA	qRT-PCR
HOVUSG2383400	F3'5'H (flavonoid 3’5’-hydroxylase)	CTGATCGCCTGTCGTGAC	CGTGAACAGGTTGTTAAGTAGAG	qRT-PCR
HOVUS6476200	F3'H (flavonoid 3’-hydroxylase)	TTCGACGACATGATGAAC	GTCCTTACCTTCCTTCTC	qRT-PCR
HOVUSG6216800	HvGT1(Anthocyanidin 3-O-glucosyltransferase)	ATAGTCTGTCCACCATCATCAT	TCTCGTCATCTCTGCTTCC	qRT-PCR
HOVUSG6091200	HvGT2(Anthocyanidin 3-O-glucosyltransferase)	GAGCGGATGAGGGCAAAG	TCACACCCGACAAACTATCTC	qRT-PCR
HOVUSG3839700	HvGT3(Anthocyanidin 3-O-glucosyltransferase)	CCTCAACAAATCCTCCTA	ACTTGTCGATGTTGTAGA	qRT-PCR
HOVUSG1981000	ubiquitin C(HvUBQ1)	CACTGGCAAGACCATCAC	CCTCCTTGTCCTGGATCT	qRT-PCR
HOVUSG6216800	HvGT1(Anthocyanidin 3-O-glucosyltransferase)	ccaggggcccctgggatccATGGCCGCGGTGCCGCA	gtcagtcacgatgcggccgcTCAGTCGGCCACGGTGCGTGCA	vector construction for protein expression
HOVUSG6091200	HvGT2(Anthocyanidin 3-O-glucosyltransferase)	ccaggggcccctgggatccATGGCGCCCCCGCCGCCGCA	gtcagtcacgatgcggccgcTCACACCCGACAAACTATCTCGACAAACTCGTCGAAGTTCT	vector construction for protein expression
HOVUSG3839700	HvGT3(Anthocyanidin 3-O-glucosyltransferase)	ccaggggcccctgggatccATGGACAACCCCAACCCCA	gtcagtcacgatgcggccgcTCACGGGTCGCGGACG	vector construction for protein expression
HOVUSG1651900	HvGT4(Anthocyanidin 3-O-glucosyltransferase)	ccaggggcccctgggatccATGGATGCCATGGTACACGT	gtcagtcacgatgcggccgcCTAGTCTTCAGTAATTCTGGGCTTCAGA	vector construction for protein expression
HOVUSG2274400	HvMaT(malonyltransferase)	5'-attB1-ATGGGCGCCAACAGCA-3'	5'-attB2-CTATATATAGACCTTCTCTGGCATGCCGA-3'	vector construction for protein expression
HOVUSG2104500	HvOMT (O-methyltransferas)	5'-attB1-ATGCTAGGTGGCCTACCTCCTCT-3'	5'-attB2-TCAAGGGTAGACTTCAATTATGGATCGAAATCCTA-3'	vector construction for protein expression
OIT34016	NtGT	CAATGCCATCTATGCTAT	ATCTGAATTAACATCTGAGT	qRT-PCR
OIT36122	NtF3H	ATGATGAGAGTGGAGTTA	GTGAGATAAGTTGAGCAT	qRT-PCR
OIS98060	NtPAL	AATTGGTGTCTCTATGGA	TTGTTGTAGTAATCGTTGA	qRT-PCR
OIT28647	NtCHS1	AACAGCCACACCTTCCAA	TCAACCTTATGCTCGCTATTAGTA	qRT-PCR
OIT32119	NtCHS2	TCACTAATAGCGAGCATA	TTCAACCACCACTATATCT	qRT-PCR
HOVUSG3307200	HvMYC1	tatccagtcactatggtcgacATGGTAATGGCGCTACCAATAGTTCGT	gatattattgacacgcccgggTCAGCGCCCTCGTGTAGCTGT	Vector construction for transient expression
HOVUSG5351600	HvMYC2	tatccagtcactatggtcgacATGAGGAGGTTCTTGCCGGCG	gatattattgacacgcccgggTCAAGGCTTGCTGCAGCAGGTACA	Vector construction for transient expression
phis2-HOVUSG4495000-Promoter	HvF3H (flavanone 3-hydroxylase)	tatccagtcactatggcggccgcCATTCCTTCTTGAAGGTGGTGCT	ccaggaatttctagaccgcggGTCCCTAGCATGAGTTTCTGCA	Vector construction for yeast one hybrid assay
pH2GW7_Ren_Luc-HOVUSG4495000-Promoter	HvF3H (flavanone 3-hydroxylase)	actaaaatccagatcactagtCATTCCTTCTTGAAGGTGGTGCT	tatccagtcactatggtcgacGTCCCTAGCATGAGTTTCTGCA	Vector construction for luciferase transactivation assay
pGADT7-HOVUSG3307200	HvMYC1	gtaccagattacgctcatatgATGGTAATGGCGCTACCAATAGTTCGT	acgattcatctgcagctcgagTCAGCGCCCTCGTGTAGCTGT	Vector construction for yeast one hybrid assay
pGADT7-HOVUSG5351600	HvMYC2	gtaccagattacgctcatatgATGAGGAGGTTCTTGCCGGCG	acgattcatctgcagctcgagTCAAGGCTTGCTGCAGCAGGTACA	Vector construction for yeast one hybrid assay

## Sheet: Supplementary Table 2
Supplementary Table 2. Estimated LC-MS Peak Intensity of all Metabolites.
Index	Q1 (Da)	Molecular Weight (Da)	Formula	Compounds	Class I	Class II	CAS	QC_01	QC_02	QC_03	QC_04	QC_05	W-I-1	W-I-2	W-I-3	W-II-1	W-II-2	W-II-3	W-III-1	W-III-2	W-III-3	B-I-1	B-I-2	B-I-3	B-II-1	B-II-2	B-II-3	B-III-1	B-III-2	B-III-3	P-I-1	P-I-2	P-I-3	P-II-1	P-II-2	P-II-3	P-III-1	P-III-2	P-III-3
mws1422	275.1	274.073	C15H14O5	(-)-Epiafzelechin	Flavonoids	Flavanols	24808-04-6	1918000	1591400	1756700	1794900	1776700	7177900	8431600	4978900	200430	355980	366040	65763	74982	76262	2282500	1348400	1199900	116160	163540	149860	133630	91802	95744	4554200	4835000	4307300	167210	207050	140220	30198	69325	51640
mws0042	305	306.061	C15H14O7	(-)-Epigallocatechin	Flavonoids	Flavanols	970-74-1	4110700	4025000	3864200	3987300	4128700	6058500	6182300	5372000	1899100	2613400	2459600	1407600	1678600	1705500	868250	515480	583370	4451900	4695500	4948400	4045400	3645100	3448900	7067200	8030500	9185900	4123000	5235800	4896700	2301200	3341600	3194600
mws0049	307	306.061	C15H14O7	(+)-Gallocatechin	Flavonoids	Flavanols	970-73-0	11273000	11114000	10825000	11381000	11414000	14992000	15746000	13245000	5772300	7615200	7295900	3906900	4996600	5337100	2627000	1495700	1703900	12712000	13273000	14646000	11016000	10069000	9805100	19291000	21617000	24323000	11299000	14298000	13563000	6529900	9976700	9270300
pmf0374	477.1	478.091	C22H22O12	2,6-Dimethyl-7-octene-2,3,6-triol	Flavonoids	Flavonoid	5041-82-7	45666	44476	46593	29939	43850	126010	114770	79784	15523	19672	23418	7876.4	15249	11886	63875	70991	60213	16750	14055	9687.1	8408.9	12095	13576	98754	95445	80727	18324	22356	13427	12849	14267	13633
Lmjp003402	405.15	404.147	C21H24O8	2'-Hydroxy-3,4,5,3',4',6'-hexameth-oxychalcone	Flavonoids	Chalcones	-	7416.9	7659.9	4828.3	7607	10189	9483	11809	14575	13519	14858	10494	10209	12305	11814	11017	10090	11131	13563	4686.8	11003	7174.7	9599.4	13264	13770	18343	12161	13493	13162	11099	7770.1	8961.5	11091
mws1174	312.9	314.067	C17H14O6	3-O-Acetylpinobanksin	Flavonoids	Dihydroflavonol	52117-69-8	13182	16716	12768	12751	14365	20772	16526	16790	6427.2	6108.8	36581	9	5814.1	10197	10539	7775.7	15418	23360	9	7160.1	9	3158.7	6249.8	25680	19483	46970	9	91520	9	7066.2	9	5700.2
Lmnp002616	655.19	654.18	C29H34O17	5,3',4'-Trihydroxy-6,7-dimethoxyflavone-8-C-[β-D-glucosyl-(1-2)]-β-D-glucoside	Flavonoids	Flavonoid carbonoside	-	163550	156250	156900	207540	189200	9	16726	7577.8	205680	198030	217000	188890	273460	195750	21525	7551.8	33386	309430	257100	324830	282730	401640	375410	9	9	9	251400	179620	241890	323980	321450	287180
Lmnp002919	609.19	608.174	C28H32O15	5,4'-Dihydroxy-6,7-dimethoxyflavone-8-C-[β-D-Xylosyl-(1-2)]-β-D-glucoside	Flavonoids	Flavonoid carbonoside	-	25018	37008	26412	31473	38250	9	9	9	9	9	9	9	9	9	9	9	9	57286	73772	75737	205180	105650	130150	9	9	9	9	9	9	81688	41278	41431
Lmnp002584	625.18	624.169	C28H32O16	5,7,4'-Trihydroxy-6-methoxyflavone-8-C-[β-D-glucosyl-(1-2)]-β-D-glucoside	Flavonoids	Flavonoid carbonoside	-	504040	623360	730230	814840	843240	9	9	9	944460	996490	821120	653840	809420	679170	9	27020	9	1141400	1135100	1112700	1163900	1346500	1120700	15090	9	9	1282200	1324600	1496100	1286200	1370100	1467100
Lmnp002845	463.13	462.116	C22H22O11	5,7,4'-Trihydroxy-6-methoxyflavone-8-C-β-D-glucoside	Flavonoids	Flavonoid carbonoside	-	268450	264850	324940	323570	327580	9	9	9	570310	460320	489130	383210	382660	511320	8781.2	9	9	527960	564930	606330	496290	458980	549700	9	10462	9	593280	631120	802100	583790	638600	690370
Lmlp003201	433.11	432.105	C21H20O10	5,7,4'-Trihydroxy-8-C-β-D-glucopyranosylflavone	Flavonoids	Flavonoid carbonoside	-	102660	144210	152140	152460	150040	30767	27416	24078	377830	329500	300090	323980	416500	446060	18656	25392	29758	142610	145470	155120	173670	158390	219680	17985	21972	23370	211300	220980	218190	624250	334100	356460
Lmnp202580	565.16	564.148	C26H28O14	5,7,4'-Trihydroxyflavone-8-C-[β-D-Xylosyl-(1-2)]-β-D-glucoside	Flavonoids	Flavonoid carbonoside	-	22934	17478	23273	25936	37472	31041	22928	12720	8893.5	11822	8192	9	9	12626	46408	15837	23614	59384	35754	29260	50105	57586	41659	17732	31279	20941	37795	32500	38223	28510	50358	48792
Zmhp003514	301.07	300.063	C16H12O6	6,7,8-Tetrahydroxy-5-methoxyflavone	Flavonoids	Flavonoid	-	431230	426610	427780	434800	437420	33822	26640	23283	13479	21737	14510	16307	18593	12040	14314	50431	33453	21272	24484	31598	37659	47395	27179	17674	13899	22971	96236	68749	72744	6389300	1578700	3161200
pmb0672	771.1	770.172	C37H38O18	6-C-Hexosyl-apigenin O-feruloylhexoside	Flavonoids	Flavonoid carbonoside	-	266510	296320	259970	338220	315620	73528	74829	56227	675170	811780	513540	1159000	1778600	1485600	30618	7874.5	13122	269690	334570	298380	369150	285970	303810	179810	136090	179480	233480	303040	211830	883100	697740	795100
pmb0666	801.1	800.181	C38H40O19	6-C-Hexosyl-apigenin O-sinapoylhexoside	Flavonoids	Flavonoid carbonoside	-	72766	80099	108420	85416	75377	50071	48788	48283	108420	64612	84747	159260	170850	174360	35724	17055	12467	162970	131500	114620	178510	157890	151930	97474	95460	103010	112830	100560	101980	239270	187470	162380
pmb0624	611.1	610.126	C27H30O16	6-C-Hexosyl-luteolin O-hexoside	Flavonoids	Flavonoid carbonoside	-	248940	239610	250920	254380	249710	14631	67751	14649	179310	230770	176680	130060	185930	159390	25566	22245	9	556350	400120	595510	562020	621320	581440	9	9	11972	449460	526010	500370	221750	395330	451070
pmp001311	627.2	626.12	C27H30O17	6-Hydroxykaempferol-7,6-O-Diglucoside	Flavonoids	Flavonols	-	36128	37376	32419	32502	44034	32360	38704	28689	6554.4	13064	7713.5	9063.7	17302	23201	46345	33756	33484	41244	22516	17764	35502	26603	48028	37913	31620	42124	64819	34378	45646	135270	106940	92879
pmp001309	465.1	464.076	C21H20O12	6-Hydroxykaempferol-7-O-glucoside	Flavonoids	Flavonols	-	52584	69370	50380	49777	101550	68934	57867	60827	27933	42394	10068	21392	10218	32174	131720	123950	121500	73111	58666	55763	83752	50557	78900	77396	65296	42449	99791	71481	86364	275400	254470	214760
pmb0682	801	800.181	C38H40O19	8-C-Hexosyl-apigenin O-sinapoylhexoside	Flavonoids	Flavonoid carbonoside	-	10088	15055	17003	20765	20056	9	9	9	44136	39618	28990	32175	38836	41144	9	9	9	8215.8	16559	20164	15168	23922	27669	9	9	9	39732	49818	27070	42125	50870	36606
pmb0618	627.1	626.155	C28H34O16	8-C-Hexosyl-hesperetin O-hexoside	Flavonoids	Flavonoid carbonoside	-	11562	12722	13327	11472	14690	10279	11704	9384.7	3702.9	2819	3508.7	3052.1	5091.5	5266.7	17971	13468	11799	11517	9123.3	6267.9	9438	8866.6	11426	10212	12608	13945	16370	5819	10566	35473	29896	23961
pmb2992	459.1	460.082	C22H20O11	Acacetin-O-glucuronic acid	Flavonoids	Flavonoid	-	25198	33112	51356	50246	54089	9	9	9	9	9	9	9	9	9	9	9	9	9	9	9	9	9	9	9	9	9	62149	43209	79188	344880	213340	218970
pme3285	275	274.073	C15H14O5	Afzelechin(3,5,7,4'-Tetrahydroxyflavan)	Flavonoids	Isoflavones	2545-00-8	4387100	3857100	3533300	3937700	3929900	16208000	16071000	11042000	416190	703300	756240	141800	170180	162240	3370600	2762700	2586400	384190	323890	361730	275370	261770	216430	8627000	11023000	10254000	321530	378690	279080	98928	172270	116480
pmb0613	757.1	756.175	C33H40O20	Apigenin 6-C-hexosyl-8-C-hexosyl-O-hexoside	Flavonoids	Flavonoid	-	34981	42734	40010	45350	50714	9	9	9	72370	63671	55503	92197	109100	84461	9	9	9	50134	52881	62339	59385	66300	60370	9	9	9	39920	38256	46357	63118	54898	60904
pme0368	579.16	578.137	C27H30O14	Apigenin 7-rutinoside(Isorhoifolin)	Flavonoids	Flavonoid	552-57-8	508530	561250	531930	589400	557020	309340	342120	163240	1319000	1026000	1280500	764260	810390	1088400	200590	128410	92266	511300	457660	394820	480220	459290	405300	403440	406140	172410	805150	509710	612240	774000	970710	944500
pmb0571	565.1	564.123	C26H28O14	Apigenin O-hexosyl-O-pentoside	Flavonoids	Flavonoid	-	14250	14196	19282	16318	27872	5611.2	3716.5	6917.8	22351	28755	18007	14892	13761	32790	9	9	9	21756	22358	12500	21798	28410	16297	9304.5	6792.5	11882	38224	33502	42807	31968	35837	41914
pmb2991	739.1	740.181	C33H40O19	Apigenin O-hexosyl-O-rutinoside	Flavonoids	Flavonoid	-	85594	74304	80649	82574	73883	10408	10142	8501.1	176810	112880	115120	191150	185740	227650	9	2408.3	9	55830	51133	52564	93833	49916	55251	12775	24511	26219	115540	112090	104060	153810	178780	143090
pmp000116	433.1	432.088	C21H20O10	Apigenin-8-C-glucoside	Flavonoids	Flavonoid carbonoside	3681-93-4	80368	92868	110800	119140	68417	9	9	9	196220	244230	177180	210060	268230	305370	9	9	9	100620	86984	93833	111810	114570	94343	9	9	9	130500	140550	173240	393200	249440	233170
Lmhn005110	299.06	300.063	C16H12O6	Aracarpene 1	Flavonoids	Isoflavones	-	819320	848860	837030	849150	850110	62293	47145	42232	23120	36516	26701	30138	41815	21793	28166	99389	59531	37284	50842	58733	64554	99247	47861	33181	24375	39572	169360	117010	122990	12401000	3001900	6302600
Lmhn004976	299.06	300.063	C16H12O6	Aracarpene 2	Flavonoids	Isoflavones	-	804160	801760	799760	808920	829050	64557	43961	39427	21561	36076	25905	30195	41132	20331	27680	91565	59732	35464	48639	58202	65911	90837	50499	29995	25100	38630	161190	112110	116470	11906000	2928000	6077200
mws2209	447.1	448.082	C21H20O11	Astragalin (Kaempferol 3-O-Glucoside)	Flavonoids	Flavonols	480-10-4	63628	67797	78500	79006	81044	9	9	9	11843	21085	17777	5964.3	5674.8	8316.7	9	9	9	27519	17590	18335	25924	14330	14230	9	9	9	166200	182470	168500	671730	417260	358490
pmn001583	609.1	610.126	C27H30O16	Bioquercetin	Flavonoids	Flavonols	52525-35-6	35387	38024	47640	37084	39568	84655	89691	79480	18520	25312	23420	18593	25610	19608	55042	52845	39572	21228	25797	24465	20475	18072	22516	57837	48696	40901	29249	26274	25591	30042	29383	33652
pme3475	273.07	272.058	C15H12O5	Butin	Flavonoids	Dihydroflavone	492-14-8	226360	183160	182110	180090	188480	1005700	1247500	773730	13759	19962	19685	14350	10340	7336	200860	373780	491060	10625	12155	13127	27011	15294	12955	130630	151950	206560	17053	43074	27190	31346	27184	32840
mws0054	289.08	290.067	C15H14O6	Catechin	Flavonoids	Flavanols	154-23-4	41110000	39988000	37392000	37882000	39239000	62643000	64487000	57726000	12897000	18122000	16973000	6636600	8012000	8895300	39251000	33166000	30974000	22894000	22460000	24379000	20782000	18831000	18255000	66357000	64058000	69845000	21075000	25672000	22586000	11302000	16160000	14758000
pmb0635	933.1	932.216	C43H48O23	C-Hexosyl-apigenin O-feruloylhexoside-O-hexoside	Flavonoids	Flavonoid carbonoside	-	7936.8	5990.5	4558.7	9441.7	7863.5	9	9	9	26886	18598	13953	29012	29973	28687	9	9	9	7995	8828	14000	8372.6	16816	14353	9	9	9	9494.2	10176	7115.5	9477.4	5728.4	10259
pmb0662	787.2	786.167	C37H38O19	C-Hexosyl-luteolin O-feruloylhexoside	Flavonoids	Flavonoid carbonoside	-	25086	36225	36337	46459	57569	9	9	9	75170	59916	71565	88020	114090	108460	9	9	9	65582	71204	61421	62000	70880	82828	9	9	9	53500	49075	77037	97170	78666	77511
pmb0622	611.2	610.126	C27H30O16	C-Hexosyl-luteolin O-hexoside	Flavonoids	Flavonoid carbonoside	-	957670	1028400	1010000	1031500	1093500	68094	293570	60517	798280	920270	897130	533050	694510	612670	92836	72450	10659	2226900	1882600	2363100	2284800	2487300	2327500	23337	92195	29083	2171100	2776800	2147400	1028900	1893200	1801400
pmb2999	461.1	462.096	C22H22O11	Chrysoeriol 5-O-hexoside	Flavonoids	Flavonoid	-	23992	27575	22283	17393	21789	9	9	9	9	9	5763.1	4085.3	9	9	9	9	9	8007.9	9	9	9	9	9	9	9	9	30000	24408	38037	150990	112500	97001
pmb0620	787.1	786.184	C34H42O21	Chrysoeriol 6-C-hexoside 8-C-hexoside-O-hexoside	Flavonoids	Flavonoid	-	18968	27237	23680	28573	25518	9	9	9	35313	33759	30571	49628	63753	54951	9	9	9	47142	36507	49272	62304	76149	72248	9	9	9	30625	25223	33442	71769	58891	64942
pmb3012	461.1	462.096	C22H22O11	Chrysoeriol 7-O-hexoside	Flavonoids	Flavonoid	-	116580	115280	123210	135550	117060	11746	15547	17705	29922	28488	23410	20734	29515	28177	7443.5	18087	9138.2	39723	33398	30036	39713	36224	36065	9	9	9	163070	111940	137830	814470	553030	571980
pmb3002	607.1	608.146	C28H32O15	Chrysoeriol 7-O-rutinoside	Flavonoids	Flavonoid	-	822310	862220	832650	790560	836950	155020	177050	85361	879330	1214900	706250	1296900	1777600	1651100	57975	56372	48452	817680	695690	853620	972280	940710	1126800	141570	113810	119790	424350	365380	434820	1700200	1799600	1925700
pmb3007	475.1	476.076	C22H20O12	Chrysoeriol O-glucuronic acid	Flavonoids	Flavonoid	-	7220300	7999500	6262200	6533200	7690700	9	9	9	47336	17768	9945.7	32791	15025	17934	9	9	9	32432	46800	57640	92387	39120	53376	9	9	9	12612000	10839000	14357000	37977000	31927000	23910000
pmb0587	639.1	638.12	C28H30O17	Chrysoeriol O-glucuronic acid-O-hexoside	Flavonoids	Flavonoid	-	15880	17344	21331	10440	16597	9	9	9	9	9	9	9	9	9	9	9	9	9	9	9	9	9	9	9	9	9	24592	21985	17768	88710	69603	36674
pmb2997	799.1	800.164	C34H40O22	Chrysoeriol O-hexosyl-O-hexosyl-O-Glucuronic acid	Flavonoids	Flavonoid	-	58807	77028	55972	70483	69255	9	9	9	138280	99949	81644	138130	130130	135090	9	9	9	63947	52689	61612	53259	84439	96854	9	9	9	96400	96334	128670	166100	148340	120280
pmb0592	771.1	770.19	C34H42O20	Chrysoeriol O-hexosyl-O-rutinoside	Flavonoids	Flavonoid	-	235210	268200	245970	251260	324780	67288	56942	56772	589020	697440	437080	997740	1064700	1476900	22740	9844.2	11826	277450	252600	267270	353200	264720	310430	116910	90303	142380	218660	298640	228830	698710	683600	716730
pmb0608	549.1	548.094	C25H24O14	Chrysoeriol O-malonylhexoside	Flavonoids	Flavonoid	-	162640	114560	122020	116200	135890	5351.9	6537.7	9053.9	7153.6	9	9	9	6550.8	11833	9	19669	6569	8067.9	8744.3	4393.8	9691.1	20725	15883	9	3439.8	9	280830	194880	198730	1196700	831800	811770
Zmxp002867	625.17	624.168	C28H32O16	Chrysoeriol-di-O-glucoside	Flavonoids	Flavonoid	-	156590	184380	178270	226330	186580	9	9	9	159170	168060	133560	84376	142830	157360	14245	42082	12069	97343	90179	99773	149840	110320	132360	9	9	9	321330	210270	306930	630520	632980	492820
pmp000127	625.2	624.14	C28H32O16	Chysoeriol-6,8-di-C-glucoside	Flavonoids	Flavonoid carbonoside	-	689410	620990	695730	718010	747850	9	9	9	783990	809160	813750	658820	839230	909900	9	9	9	1411600	1170600	1455500	1474000	1626300	1394800	9	9	9	1092900	1339300	1390000	876690	1094800	1266600
pmb2965	619.13	621.146	C28H29O16+	Cyanidin 3-(3",6"-diacetyl-hexoside)-O-glyceric acid	Flavonoids	Anthocyanins	-	2431500	1970400	1996600	1989000	1868200	9	9	9	51314	24012	16162	23226	19002	19951	9	9	9	60578	52205	33120	158460	99233	121550	9	9	9	5867400	3536300	5459100	12786000	10700000	9652500
pme1777	611.16	611.161	C27H31O16+	Cyanidin 3,5-O-diglucoside (Cyanin)	Flavonoids	Anthocyanins	2611-67-8	1039100	1114800	1227800	1252500	1165900	118700	120640	102410	963330	1200900	1183200	887520	962690	998130	12200	9387.9	7468.7	1569800	1736900	1760800	1474100	1532900	1445100	166880	289560	332510	1758200	2138000	2042900	1434400	1617200	1454200
pmb0557	621.11	621.109	C27H25O17+	Cyanidin 3-(3'',6''-dimalonyl)glucoside	Flavonoids	Anthocyanins	171828-60-7	71104000	66255000	51701000	62899000	58678000	9	9	9	3219200	1516600	753240	4221800	1361400	1225700	9	9	9	2391900	2091700	1758100	6808400	3574400	4153300	900000	9	9	126680000	97537000	112880000	164080000	177520000	176120000
pmf0027	449.11	449.108	C21H21O11+	Cyanidin 3-O-galactoside	Flavonoids	Anthocyanins	142506-26-1	1507500	1768400	1712900	1972500	2053100	9	9	9	9	9	9	9	9	9	9	9	9	9	9	9	111210	107030	125670	9	9	9	7092900	6270400	8292200	17151000	14959000	12704000
pme1773	595.17	595.166	C27H31O15+	Cyanidin 3-O-rutinoside (Keracyanin)	Flavonoids	Anthocyanins	28338-59-2	9912200	9769500	10329000	9764100	9542900	3624100	3756000	3114000	9791400	11903000	11909000	9744700	10907000	10263000	706570	436710	418790	14216000	13963000	15423000	15012000	13613000	13937000	5291900	5709100	7236600	15052000	18976000	16516000	12501000	16990000	14518000
pmb0653	595.1	594.132	C27H30O15	Di-C,C-hexosyl-apigenin	Flavonoids	Flavonoid	-	363220	445380	464050	438580	425260	93382	124470	63962	690670	648790	562570	624860	917680	737520	169520	68146	143430	431020	474280	718100	647730	534520	502750	18092	63888	35694	521370	721690	585010	477080	430020	421460
mws1094	287.06	288.053	C15H12O6	Dihydrokaempferol	Flavonoids	Dihydroflavonol	480-20-6	31044	26168	27891	27946	32479	92227	103430	116500	9	9	9	9	9	2692	53997	68327	62749	7434.9	7309.2	7182.5	8616.3	8887.8	8089.2	53968	37922	40242	6714.2	7073	6260.1	12949	11555	9920.3
mws0744	319.05	320.041	C15H12O8	Dihydromyricetin(Ampelopsin)	Flavonoids	Dihydroflavonol	27200-12-0	192580	175490	183240	212180	244750	185850	129860	169870	237810	381520	483190	25002	21478	22553	26422	26329	22784	168080	176060	225480	125030	106050	94539	210130	170820	289800	514250	484680	487840	85027	154310	164630
pmb3894	329.1	330.061	C17H14O7	Di-O-methylquercetin	Flavonoids	Flavonols	2068-02-2	2981900	2859100	2905700	2797100	2722300	8907700	7247800	7427100	540890	762510	694250	956600	1014000	730470	4158900	8169100	8366700	941500	823490	1091200	1272000	1003700	885730	6776500	2313400	2766600	709300	850520	621280	1568000	1144700	1226500
mws0058	299.06	300.053	C16H12O6	Diosmetin	Flavonoids	Flavonoid	520-34-3	793880	804680	802970	812580	794300	65336	46168	41213	25768	37653	30205	30962	34492	19904	28987	95130	56758	37039	51490	60252	67777	88954	50008	34017	23888	41386	168300	119290	130340	11571000	2799300	5724800
pmp000120	463.1	462.096	C22H22O11	Diosmetin-6-C-glucoside	Flavonoids	Flavonoid	-	85978	98436	98760	120690	150570	9	9	9	195500	254690	214810	179580	156410	182760	9	9	9	241350	163630	228260	138280	209920	211870	9	9	9	291020	278840	330730	153590	304500	247190
pmp000579	463.12	462.096	C22H22O11	Diosmetin-7-O-galactoside	Flavonoids	Flavonoid	-	2025300	2274500	2371900	2334900	2396400	99515	154670	187170	863690	1503900	873900	521970	871470	1080100	106360	406610	106760	1477600	1377800	1386700	1057700	1122200	1188800	38913	80828	61950	4396900	3956300	4873700	16407000	12094000	9737200
pmp000583	477.1	476.076	C22H20O12	Diosmetin-7-O-glucuronide	Flavonoids	Flavonoid	35110-20-4	14594000	18007000	15033000	19584000	16909000	9	9	9	199280	95054	53800	9	9	9	9	9	9	153830	148420	209000	326420	173970	218320	9	9	9	38269000	32950000	38633000	68803000	65564000	65937000
pmp000594	609.18	608.146	C28H32O15	Diosmetin-7-O-rutin	Flavonoids	Flavonoid	-	889120	993020	881240	1063300	1145500	204090	169030	119370	1216000	1749100	896710	1677500	2058600	2123600	79977	74604	49429	859380	951220	1151500	1551900	1231400	1671400	199270	193390	154660	611880	484360	561610	2669400	2560600	2356300
mws1661	609.18	608.146	C28H32O15	Diosmin	Flavonoids	Flavonoid	520-27-4	2334100	2043000	2301700	2403600	2563100	485740	375290	315840	2746300	3469200	2325400	4005100	4778500	5152500	233860	162380	194340	2028300	2256200	2141800	3032800	3325700	3044500	446780	420310	392260	1318900	1248400	1267700	5017000	5425800	4574700
pmb0628	613.1	612.14	C27H32O16	Eriodictiol C-hexosyl-O-hexoside	Flavonoids	Dihydroflavone	-	19619	20706	22918	26741	16236	9	9	9	11864	19019	12787	10811	14623	9	9	9	9	37770	30711	47079	46545	47890	46327	9	9	9	35519	49527	29544	22470	35538	32221
mws0064	287.06	288.053	C15H12O6	Eriodictyol	Flavonoids	Dihydroflavone	552-58-9	11859	11541	11144	12571	9175.1	16848	21394	10441	4735.8	7487.9	6303.5	9	4304.9	9	7793.5	9493	7738.9	9	9	2898.4	9697	6065.5	4058.7	13630	11246	15794	5890.9	14150	7672	24772	19055	19934
pmb3023	449.1	450.096	C21H22O11	Eriodictyol C-hexoside	Flavonoids	Dihydroflavone	-	200750	183300	203330	202400	198540	421720	456330	335950	251480	245340	298750	185920	224590	220520	121650	106180	86674	112790	126510	138430	122570	115960	116940	248340	255760	247600	160860	183990	163000	131300	142630	158850
pmp000411	565.15	564.123	C26H28O14	Genistein 8-C-apiosyl(1→6)glucoside	Flavonoids	Flavonoid carbonoside	-	27056	24744	33544	30900	39425	34275	24744	25483	5276.2	16358	16545	10605	8360.2	9984.5	40657	38210	42171	40487	36126	23573	57934	40944	46656	17623	36553	31396	49306	32870	22987	62306	35594	40908
pmp000413	433.11	432.088	C21H20O10	Genistein 8-C-glucoside	Flavonoids	Flavonoid carbonoside	66026-80-0	143030	161770	153570	186320	270040	25543	70395	24849	386550	329160	282660	407070	476280	474940	26773	31460	41911	160790	135770	178910	154360	204500	186060	24103	36822	18710	239060	227170	220810	550930	418560	388490
mws0061	463.1	464.076	C21H20O12	Hyperin	Flavonoids	Flavonols	482-36-0	36140	31750	32132	44826	36984	28238	25602	23273	16824	15529	17629	12401	12431	12520	44944	44899	35888	17715	14290	20080	24022	18997	19313	22919	29825	22202	42408	33599	49921	92687	83502	74812
Zmhp002897	625.18	624.168	C28H32O16	Isochrysoeriol C-hexosyl-O-hexoside	Flavonoids	Flavonoid	-	685010	793600	834060	777260	607530	31629	28501	33000	725140	601680	719930	649220	792840	715660	9	9	9	1101800	919500	1155700	979230	1324300	1179100	9	9	9	1040600	1096000	1255000	1095800	1386700	1281600
Lmdp003286	465.1	464.095	C21H20O12	Isohyperoside	Flavonoids	Flavonols	35589-21-0	63066	74048	49140	61733	69102	83257	62858	41806	19543	21502	22751	16615	46720	50079	111430	115760	69618	65324	60233	45455	9	9	9	66964	46850	64106	95604	60856	116540	258200	230440	193050
Zmhp002409	611.16	610.153	C27H30O16	Isoluteolin-6,8-di-C-glucoside	Flavonoids	Flavonoid	-	101000	121980	111300	130820	117040	7618.4	29070	5791.1	74200	101610	84303	64366	68652	61584	7506.6	10935	9	221000	208510	242520	270870	273000	252810	4671.3	8580.1	3102.2	209330	291750	228360	111670	160160	219180
pmp000700	449.1	448.082	C21H20O11	Isoorientin	Flavonoids	Flavonoid carbonoside	4261-42-1	127980	139580	130560	164620	142700	48583	106360	18486	160300	216300	222030	133870	119510	115320	26264	27870	9	304710	284000	290850	208090	253750	347430	9	9	9	480230	350010	298770	304630	274920	238660
mws0091	463.09	464.076	C21H20O12	Isoquercitrin	Flavonoids	Flavonols	482-35-9	18580	17575	24716	26988	24587	18585	18585	12938	3628.6	3978.6	8674	9	2589.1	2843	37604	30530	30454	12330	7164.2	7007.8	10835	8739.1	6435.3	16693	20065	12636	14953	18463	23247	73180	59576	55799
pmn001645	533.1	534.08	C24H22O14	Isorhamnetin 3-O-β-(2''-O-acetyl-β-D-glucuronide)	Flavonoids	Flavonols	-	20370	21625	18496	21614	16636	60393	79123	49005	6374.5	9600.4	12234	3594.7	4360.4	3053.2	16303	14480	9747.8	21009	26826	24386	32584	18752	26890	20292	14870	16944	9	9	9	28201	9	9
Li512111	519.11	520.1	C24H24O13	Isorhamnetin acetyl hexoside	Flavonoids	Flavonols	-	20970	17695	17564	18995	19030	38363	42282	26860	2809.6	4334.6	3265.6	9	9	3682	8314.4	15154	9642.7	9	4159.4	5517	4342.5	5077.1	4709.5	30016	23392	21032	13633	11960	16597	28979	26404	22811
Lnrp002670	625.17	624.169	C28H32O16	Isorhamnetin glc-rha	Flavonoids	Flavonols	-	416020	461060	387250	489050	512080	488320	584880	492770	307010	359390	258850	376440	425320	458690	315670	302520	215360	342770	265010	279670	354980	360600	452160	9	9	678680	587990	554810	9	501110	638230	624690
Li512112	563.1	564.088	C25H24O15	Isorhamnetin hexose-malonate	Flavonoids	Flavonols	-	13473	6674.2	8528.3	10653	9657.3	21701	17595	14434	9	9	9	1905.2	9	9	6220.3	5762	3850.2	9	9	9	9	9	9	17105	14621	13471	7972.5	6096.8	7664.5	19529	11848	14633
pmb3013	519.1	520.1	C24H24O13	Isorhamnetin O-acetyl-hexoside	Flavonoids	Flavonols	-	13831	12367	14070	14507	14555	33405	29915	23249	9	9	9	1675	9	9	12026	11771	7801	9	4377.8	2862.2	9	9	9	25385	17191	20830	14970	12472	8100.8	31376	21225	19165
GQ512002	623.1	624.14	C28H32O16	Isorhamnetin-3-O-rutinoside	Flavonoids	Flavonols	604-80-8	179090	170750	183440	213020	163850	265920	262420	216060	112530	143190	135260	126700	177160	150620	125790	105420	90565	131690	140340	106560	165310	120800	156500	284110	217320	237450	218500	226510	197370	206280	200530	218020
Hmpp003242	479.11	478.101	C22H22O12	Isorhamnetin-3-O-β-D-glucoside	Flavonoids	Flavonols	-	206310	215120	182560	186510	226650	721980	802050	486270	78099	133510	123990	56806	60690	74155	453470	477470	343910	81284	81474	92595	83818	59092	55864	499250	490790	569630	116450	124560	81268	57756	80106	72771
Hmcp002207	479.12	478.111	C22H22O12	Isorhamnetin-7-O-β-D-glucopyranoside	Flavonoids	Flavonols	-	157530	185980	163200	184250	218300	611160	726010	455110	84578	99932	113040	43704	83682	68475	355530	360400	326230	86440	81998	78228	46374	58441	53754	486120	521650	424590	100920	103970	90229	73552	67342	79365
Hmlp002975	639.15	638.139	C28H30O17	Isorhamnetin-O-glucuronate-O-rhamnoside	Flavonoids	Flavonols	-	441820	543420	527280	684120	594420	367660	369190	184390	201610	183090	217530	337140	467480	441770	285220	158050	272090	675970	738380	806080	1871000	1814000	2103800	344230	395210	249310	195320	244010	247710	1119400	754330	939240
Hmcp001578	641.17	640.163	C28H32O17	Isorhamnetin-O-Hexoside-O-Hexoside	Flavonoids	Flavonols	-	20285	24135	14636	28048	22470	28416	35576	31745	14003	15909	11926	8600	13002	16732	39394	32059	26802	17273	14101	12471	13062	13538	14036	44632	48902	47224	18574	25830	14814	18328	36484	14759
Hmcp001509	773.22	772.206	C33H40O21	Isorhamnetin-O-Hexoside-O-Hexoside-O-Pentoside	Flavonoids	Flavonols	-	12955	11060	10968	12312	17588	25463	27300	19998	4871.2	10044	12917	9	6661	8646.5	18913	14885	16079	13178	8840.3	9202.9	10623	6344.9	8887.4	26732	29300	26822	31310	27768	21364	7457	10155	14793
Hmjp002133	787.22	786.217	C34H42O21	Isorhamnetin-O-Hexoside-O-Hexoside-O-rhamnoside	Flavonoids	Flavonols	-	32534	53299	44629	56727	61861	105330	122580	95027	36780	47677	56912	27613	38682	26776	66427	43686	33972	46858	49189	40987	35443	28018	31519	175930	151210	161830	57292	74678	53812	41994	46748	47106
Hmcp001658	727.17	726.164	C31H34O20	Isorhamnetin-O-Hexoside-O-malonyl-O-Hexoside	Flavonoids	Flavonols	-	5681.9	8063.1	10913	3797.5	5227.1	8081.9	10024	5720.8	9001.8	8357	7350.3	8502.3	4276.4	7177.3	2384.3	1912.9	9	5836.5	5263.8	12892	11886	7602.8	5701.8	8541.7	14840	24294	12595	16299	12371	12863	10389	13888
Hmcp001859	625.17	624.17	C28H32O16	Isorhamnetin-O-rutinoside	Flavonoids	Flavonols	-	753510	724780	826700	739600	886260	9	9	9	721840	778760	814230	804860	764830	808330	9	9	9	1271000	1222200	1085600	1091000	1411600	1304600	9	9	9	1147200	1282700	1359400	1132300	1413700	1196700
Zmhp002798	595.17	594.158	C27H30O15	Isosaponarin	Flavonoids	Flavonoid	19416-87-6	180670	209220	200120	178290	178260	54835	52428	26744	286620	268960	253870	253730	380350	286800	68320	20896	48308	218690	224390	277000	217400	266080	227340	12315	23946	13672	285050	268330	246030	187660	242400	257870
mws1292	565.2	564.123	C26H28O14	Isoschaftoside	Flavonoids	Flavonoid carbonoside	52012-29-0	149220	135000	142700	163990	144260	127590	91370	84711	66542	58033	65319	39417	50217	52793	184660	162610	148450	204270	200270	176710	256040	251010	252980	99987	195790	98715	172240	165670	179730	288190	226430	213960
Zmhn003191	461.11	462.116	C22H22O11	Isoscoparin	Flavonoids	Flavonoid	20013-23-4	496550	506560	510630	550720	513400	17606	22437	16453	684780	826650	758970	546130	558200	656450	3773.1	21373	9	774310	598130	715690	585660	695650	727430	2348.8	5273.2	9	806560	1048900	1094100	690290	806680	852940
mws1434	431.11	432.088	C21H20O10	Isovitexin	Flavonoids	Flavonoid carbonoside	29702-25-8	200640	186280	197570	211130	203480	35268	33357	18140	347070	274650	286080	393580	498050	502580	24436	22596	34719	138790	162000	166030	172900	172790	202490	9	9	22565	247620	239790	231410	544110	397420	387580
pmp000004	331.08	330.074	C17H14O7	Jaceosidin	Flavonoids	Flavonoid	18085-97-7	65703	67903	58335	60059	60516	108990	118830	41673	6257.8	5374	17073	6830.6	8706.6	5884.4	13130	19456	6850.2	43780	52456	63610	100930	93547	94225	22000	21005	8385.4	18973	13115	12418	217380	103530	131080
Hmln002402	533.1	534.101	C24H22O14	Kaempferol 3-O-(6′′-O-malonyl)-galactoside	Flavonoids	Flavonols	-	14501	15393	11564	16582	12299	46605	36074	27846	4102.7	5120.4	5917.8	9	9	3419.2	8532.9	9364.6	4388.2	10830	16991	12079	26381	9900	16046	10636	7801.2	7151.1	7819	4673.1	7574.8	9	9	9
Hmln002483	533.1	534.101	C24H22O14	Kaempferol 3-O-(6′′-O-malonyl)-glucoside	Flavonoids	Flavonols	-	13661	13593	14816	13263	12929	52406	49258	29467	9	5233.7	6467.1	2309.4	3916.6	9	7745.5	8842.9	6438.3	11729	18043	14708	19275	15234	16624	11985	9537.6	12054	8743.1	9	9	9	9	9
Zmhn003099	431.1	432.105	C21H20O10	Kaempferol 3-O-α-L-rhamnoside(X)	Flavonoids	Flavonols	-	86554	98952	99679	111120	103650	17291	17496	7541.4	161000	150130	145950	175230	233730	210260	11526	12209	16159	82840	68893	72199	96307	88890	98432	9743.3	9415.6	11748	111690	120370	100420	253920	194560	200330
Lmyn001269	609.15	610.154	C27H30O16	Kaempferol 3-O-β-D-sophoroside	Flavonoids	Flavonols	19895-95-5	21556	18036	20853	20712	20719	72330	96625	56525	9	9	9	9	9	9	76717	65386	41610	9	9	9	9	9	9	87703	105450	118240	9	9	9	9	9	9
mws0089	447.09	448.082	C21H20O11	Kaempferol 7-O-glucosdie	Flavonoids	Flavonols	16290-07-6	73031	64602	76883	74413	82158	9	9	9	11590	20345	18231	9	7045.1	10408	9	9	9	21526	19887	23675	28638	15438	19446	9	9	9	156140	177770	179990	546150	445360	313480
pmp001105	757.22	756.175	C33H40O20	Kaempferol-3-neohesperidoside-7-glucoside	Flavonoids	Flavonols	-	15289	18851	21321	15230	21175	11156	43425	17057	11908	16958	11611	8338.3	9	9	14488	19568	9	16437	8495.5	28941	32751	24719	27087	9	9	9	37749	73397	32884	21566	64636	45050
GQ512005	595.16	594.132	C27H30O15	Kaempferol-3-O-glucoside-7-O-rhamnoside	Flavonoids	Flavonols	-	18154	36512	19770	20278	25644	14024	54033	14384	38262	35795	26802	37173	58017	62519	14666	15583	9	23940	17484	25406	38493	31234	35686	20762	31236	7143.2	42571	25937	39742	37082	72368	50483
Lmzn001894	461.07	462.08	C21H18O12	Kaempferol-3-O-β-D-glucuronide	Flavonoids	Flavonols	-	1491800	1291900	1376400	1423200	1518100	9	9	9	51899	16420	7222	23386	13129	14842	9	9	9	4859.3	9353.2	9905.3	20292	15887	12600	9	9	9	2733500	2183000	3003800	11066000	7778000	7326800
pmp001107	757.22	756.175	C33H40O20	Kaempferol-3-rutinoside-7-glucoside	Flavonoids	Flavonols	-	8723.8	21023	20175	24724	22127	14326	37214	20139	17201	19655	16168	12116	8125.5	9076.8	12058	20345	2175.3	20231	11369	27600	27873	28484	26162	5948.8	24498	1754.1	31616	69464	34841	13808	50369	48015
Hmcp001629	697.16	696.153	C30H32O19	Kaempferol-O-Hexoside-O-malonyl-O-Hexoside	Flavonoids	Flavonols	-	9537.1	4577.4	11951	14274	10781	13842	19253	11954	5765.8	11238	5201.9	4263.7	6958.9	7281.4	9	9	1930.5	29758	23494	19373	36655	25908	34631	8891.2	10072	9694.7	14693	9	8428.3	9	7329.1	10738
Hmcp002029	581.15	580.142	C26H28O15	Kaempferol-O-Pentoside-O-hexoside	Flavonoids	Flavonols	-	50934	69913	52178	48334	69686	261050	286070	213090	40738	52624	63051	6190.8	25009	30742	117160	83351	73020	27670	15541	27517	26956	18581	30374	92170	69444	79470	43177	35100	32848	24494	18260	26697
pmp000002	315.08	314.067	C17H14O6	Ladanein	Flavonoids	Flavonoid	10176-71-3	9554.4	9538.9	12802	10741	7793.5	9	9	9	9	9	9	9	9	9	9	9	9	9	9	9	9	9	9	9	9	9	9	9	9	202340	46387	84720
pme0460	291	290.067	C15H14O6	L-Epicatechin	Flavonoids	Flavanols	490-46-0	1168800	1230100	1319400	1273200	1321000	2292800	2470000	2048200	487880	657820	607830	283660	228390	292810	1471100	1240100	1096500	715420	801420	810260	678260	534420	647560	2666200	2683800	2801000	681710	920490	794490	346390	485530	494910
Hmcp002187	509.13	508.121	C23H24O13	Limocitrin 3-galactoside	Flavonoids	Flavonoid	-	62837	59908	57653	62978	49995	37414	41575	28598	43658	76408	75452	61740	98064	69992	52326	49011	41738	68364	40464	45116	86818	84344	107370	54991	47940	37733	79912	63631	58970	99444	133190	122250
Hmcp002268	493.13	492.126	C23H24O12	Limocitrin 3-rhamnoside	Flavonoids	Flavonoid	-	2503100	3277600	3281500	2886900	3240300	34104	306790	47060	2241600	2735100	2356100	1498800	1912300	2213600	112420	72629	70144	6612100	6265700	6451900	8577300	9183900	10313000	101280	114510	61956	3966100	3538600	4419400	6665800	5218100	5592900
Hmcp001636	509.13	508.121	C23H24O13	Limocitrin 7-glucoside	Flavonoids	Flavonoid	-	66633	87434	57966	73968	54191	133190	108510	127580	103750	111590	98815	65108	52137	81429	104760	88669	60088	82872	125280	97638	94754	91512	77242	136290	130860	126620	69666	71833	80577	50986	67816	62490
pmb0588	611.1	610.126	C27H30O16	Luteolin 3',7-di-O-glucoside	Flavonoids	Flavonoid	52187-80-1	18190	19220	16720	33982	16050	9	9	9	13461	23956	15782	9	16319	12210	9	9	9	16686	32894	41491	33162	37179	30196	9	9	9	28217	46668	35906	19838	46906	36600
pmb1108	773.1	772.17	C33H40O21	Luteolin 6-C-hexoside 8-C-hexosyl-O-hexoside	Flavonoids	Flavonoid	-	39478	48397	50173	47138	59046	9	9	9	44318	57580	49435	55199	74658	61109	9	9	9	112870	107490	107470	106380	122710	137640	9	9	9	73692	59288	73533	90630	82214	77739
pme2459	449.1	448.082	C21H20O11	Luteolin 7-O-glucoside(Cynaroside)	Flavonoids	Flavonoid	5373-11-5	170450	238000	259270	258120	290540	9	9	9	50726	59845	80011	25379	31266	36730	9	9	9	149700	81898	112670	95332	74829	107820	9	9	9	570910	523860	670480	2723600	1532700	1242600
mws4167	463.09	462.062	C21H18O12	Luteolin 7-O-glucuronide	Flavonoids	Flavonoid	29741-10-4	1848900	2022000	2060600	1951700	2290800	9	9	9	96906	51720	28600	107890	31979	27891	9	9	9	21870	7970.2	25552	51245	22665	35524	9	9	9	4967700	3478700	5744900	20085000	13608000	11763000
pmb3024	447.1	448.082	C21H20O11	Luteolin C-hexoside	Flavonoids	Flavonoid	-	218470	197700	242520	223600	233930	70632	155480	48709	210560	249810	238600	165790	194620	158610	26461	58440	10672	413780	297770	350630	336080	427910	359010	37687	57885	21202	359820	463410	438260	387850	363250	330440
pmb0691	757.1	756.175	C33H40O20	Luteolin C-hexosyl-O-rhamnoside O-hexoside	Flavonoids	Flavonoid	-	6819.2	10974	13515	15794	13958	9474.2	24186	8999.2	14756	11565	8055.1	7598.5	5742.5	6502.2	6431.8	17538	9	9282.4	6470	13393	19635	15507	20772	4637.7	12211	9	26904	48581	17872	9714.9	31706	23182
pmp000126	611.2	610.126	C27H30O16	Luteolin-6,8-di-C-glucoside	Flavonoids	Flavonoid	29428-58-8	423330	451840	426950	478850	515680	33101	109650	32845	336010	378100	340870	251980	267420	218380	41758	48321	9	885280	702700	1004800	941250	1092300	1094700	9	31781	8998.2	809700	1204600	773570	431110	754800	840000
pmp000241	625.14	624.106	C27H28O17	Luteolin-6-C-2-glucuronylglucoside	Flavonoids	Flavonoid	-	116370	139450	171300	162930	152480	9	9	9	221270	201670	189820	172450	158910	191200	9	9	9	333760	289760	301090	328380	325680	275240	9	9	9	274750	208830	251290	194130	257800	227390
pmp000595	611.16	610.126	C27H30O16	Luteolin-7,3'-Di-O-β-D-Glucoside	Flavonoids	Flavonoid	257-724-7	334500	426580	421680	499710	432070	25037	121000	22135	304650	358760	338570	211300	261600	232990	44201	21160	30146	799390	695160	825560	1012200	1078500	929660	21418	39112	9673.5	768930	1005600	787170	511900	812930	764850
pmn001713	593.17	594.132	C27H30O15	Luteolin-7-O-β-D-rutinoside	Flavonoids	Flavonoid	-	5799.7	7531.4	8354.2	7075.5	6080.3	9	9	9	10703	10443	9471.6	10488	11784	12323	3841.7	9	3106.6	8169.1	6038.4	10684	7147.3	7640.3	7815.8	9	9	9	8989	11738	8153	7893.8	7781.7	8829.8
Hmqp003184	667.14	666.137	C29H30O18	Luteolin-O-Malonyl-O-Hexoside-O-Pentoside	Flavonoids	Flavonoid	-	47748	62596	52597	65699	50320	5627.2	11246	9	80790	88867	75216	68936	92906	96654	9	9	9	60920	62980	71168	76881	63140	70121	12494	6795	15731	105930	47440	64102	107480	118190	112000
pmf0616	697.2	697.198	C31H37O18+	Malvidin 3(6''-acetyl-glucoside)-5-glucoside	Flavonoids	Anthocyanins	-	23684	26201	26375	15871	24220	51108	64129	50270	9	9	9	9	9	9	21168	12925	9701.1	9	9	9	9	9	9	159840	153710	104520	9	9	9	9	9	9
Lmmp002963	625.18	624.169	C28H32O16	Methylquercetin glu-rha	Flavonoids	Flavonols	-	123220	140000	165100	90308	118470	238560	252840	167610	98180	62500	98229	72132	106750	96737	75008	75381	123090	93656	167150	131980	177380	109080	115600	221330	126130	208590	184780	173930	131340	152040	159270	85734
Lmdp002969	481.1	480.09	C21H20O13	Myricetin 3-O-galactoside	Flavonoids	Flavonols	15648-86-9	48674	37635	65562	72768	84061	23503	27878	19794	48958	51330	74504	40101	68860	70317	29844	20054	29858	162840	184970	126320	125230	100280	165080	17478	40078	12117	83904	43935	41345	122300	137110	66892
Lmln001801	625.15	626.149	C27H30O17	Myricetin-3,7-O-dirhamnoside	Flavonoids	Flavonoid	-	10577	14407	10957	12074	9913.9	6147.1	6972	5764.5	13579	14266	15222	12415	16005	11419	9	2117.3	9	9719.1	12749	10251	15316	12136	12017	5105.1	4667.8	5942.4	17315	11869	11104	16100	16988	18486
Lmhp002613	627.15	626.148	C27H30O17	Myricetin-O-glucoside-rhamnoside	Flavonoids	Flavonols	-	250710	255710	202090	299450	324900	200280	172750	128740	374100	343520	356010	252300	345610	327840	23537	35388	28316	252670	260140	223950	293690	212420	302290	151560	112470	156960	326360	275770	207460	317620	388040	312760
pme2960	273.07	272.058	C15H12O5	Naringenin chalcone	Flavonoids	Chalcones	73692-50-9	194040	182520	172330	180270	166870	958170	1160700	807520	13035	17908	20453	13825	9894.2	8528.1	187960	378460	487230	12537	8358.9	7392.4	25879	11180	11170	127060	137050	211460	18945	38874	22886	28086	18204	26724
pmp001080	609.18	608.146	C28H32O15	Neodiosmin (Diosmetin-7-O-Neohesperidoside)	Flavonoids	Flavonoid	38665-01-9	879040	1021700	1001000	1056900	1119500	216250	179300	114800	1241700	1647800	999620	1596800	2069300	2425500	80432	77176	63493	869510	932560	1164600	1574600	1250600	1337900	159610	158910	123220	627020	449740	472610	2415700	2328300	2218300
mws1299	449.1	448.082	C21H20O11	Orientin	Flavonoids	Flavonoid carbonoside	28608-75-5	142960	149680	209400	229190	220870	87832	158200	38254	320080	363370	337010	194950	214440	228980	31530	43806	6943.8	538880	423130	470950	425260	466060	428660	34653	59902	5041.8	493820	514250	562780	461020	494990	466950
pme1793	595.17	595.166	C27H31O15+	Pelargonidin 3,5-diglucoside	Flavonoids	Anthocyanins	17334-58-6	108830	110750	112550	104270	118530	74362	80089	73476	101210	135620	134430	77932	89196	96707	35998	33978	26896	143140	149480	157490	142600	139910	137680	104790	112180	115440	198810	236770	168370	120170	160630	146700
pmb0562	605.11	605.114	C27H25O16+	Pelargonidin 3-(3'',6''-dimalonyl)glucoside	Flavonoids	Anthocyanins	-	1541900	1802600	1519900	1733200	1515300	9	9	9	9	9	9	9	9	9	9	9	9	299770	276680	265380	666110	363050	492760	9	9	9	3012600	1667700	3126000	14946000	9709000	9455600
pmb2961	547.11	549.124	C25H25O14+	Peonidin 3-(6''-malonyl)glucoside	Flavonoids	Anthocyanins	-	28527	27974	29350	30850	28634	5261.3	5584.7	5342.3	28642	25355	24798	17841	24651	24286	9	9	9	51289	53013	67074	40931	48584	38394	11394	12583	18001	21915	29521	34763	29408	36397	32182
mws0914	271	272.058	C15H12O5	Pinobanksin	Flavonoids	Dihydroflavonol	548-82-3	179590	167790	168800	169930	164870	825080	981350	642800	11538	19000	17311	10759	11765	10167	151530	328970	367860	10808	10556	11501	25737	12603	10204	112310	117650	167330	15360	41238	23114	30696	26577	27306
pmp000548	301.07	300.053	C16H12O6	Pratensein	Flavonoids	Isoflavones	2284-31-3	428960	413990	413010	418150	429700	31762	29108	21320	8453.7	15413	11788	12231	18170	12888	14951	49810	34363	22211	21482	28594	28316	45222	19023	15138	10256	21445	95383	58953	54096	5904500	1471000	3252600
mws0183	153.1	154.021	C7H6O4	Protocatechuic acid	Flavonoids	Flavanols	99-50-3	464000	491340	436820	449770	441010	859530	927070	849540	35933	80061	60134	9	9	9	925660	913450	759760	105100	121380	134430	65548	64266	55033	996720	985580	1099100	168160	237110	180120	117200	87421	112660
pme2482	139.1	138.026	C7H6O3	Protocatechuic aldehyde	Flavonoids	Flavanols	139-85-5	170840	201060	204900	221780	211580	328460	424150	281880	103650	119000	116330	44061	49607	71937	304750	162980	210700	173560	171360	169310	157170	148680	137570	469390	433160	383790	135760	161180	146410	56321	115200	101680
pmp000414	579.17	578.137	C27H30O14	Puerarin 4'-O-D-glucoside	Flavonoids	Flavonoid carbonoside	117047-08-2	30409	31614	31007	35008	28278	44141	36437	35834	23340	31466	30089	26042	24678	23788	27732	26918	20247	29708	31373	32405	27448	27575	27207	52699	56643	55154	36107	38798	25343	21880	27288	27824
pmp000596	627.15	626.12	C27H30O17	Quercetin 3,7-bis-O-β-D-glucoside	Flavonoids	Flavonols	-	22744	30769	30505	31264	30933	31255	27110	18650	7706	9904.3	7764.7	5360.3	14387	12407	38437	21440	29678	28010	17201	10684	24883	16783	34871	32601	26901	38109	40644	24381	36717	91086	76792	73107
Hmln002199	505.1	506.107	C23H22O13	Quercetin 3-O-(6′′-O-acetyl)-galactoside	Flavonoids	Flavonols	-	18916	16297	17957	33147	30179	9	9	9	9	9	9	9	9	9	9	9	9	9755	7024.9	9	9	9	9	9	9	9	42950	29368	46548	181360	136060	111340
Hmln002189	549.09	550.096	C24H22O15	Quercetin 3-O-(6′′-O-malonyl)-galactoside	Flavonoids	Flavonols	-	107720	118420	114450	104190	118330	20289	15814	16182	13986	8514.6	10020	9	9	9	9	9	9	24370	29306	16468	45372	25500	37893	9	9843.2	3960.8	201320	136150	198410	825880	654990	565880
Li512117	611.16	610.126	C27H30O16	Quercetin 3-O-rhanosylgalactoside	Flavonoids	Flavonols	-	47181	48919	27424	61474	63721	9	9	9	65059	57715	34348	93060	87576	105610	9	9	9	49405	50995	42836	84590	53233	84270	9	9	9	23196	22559	18964	186060	112070	76589
pmb0706	713.1	712.118	C30H32O20	Quercetin 5-O-malonylhexosyl-hexoside	Flavonoids	Flavonoid	-	6842.3	9540.5	8490.2	10604	9237.8	9	9	9	9	9	9	9	9	9	9	9	9	2718.9	3129.2	3495.7	8649.1	4117.8	4963.1	9	9	9	23194	15614	16098	51722	50252	32825
Lmmp002334	773.21	772.206	C33H40O21	Quercetin glucoside-glucoside-rhamnoside	Flavonoids	Flavonols	-	26280	29130	26383	25747	27165	58285	65902	60800	18675	15843	16776	12395	28471	37892	34779	17605	10935	17836	12822	19612	25124	13542	21362	72017	67555	63508	16641	16010	15151	42253	41510	42395
Lmmp002440	713.15	712.149	C30H32O20	Quercetin glucoside-malonyl-glucoside	Flavonoids	Flavonols	-	19141	20873	16923	23355	18190	9	9	9	4969.6	9	9	9	9	9	9	9	9	11881	10863	6448.5	20046	10903	19390	9	9	9	53963	45654	48718	140850	115400	95396
Lmmp003091	611.16	610.153	C27H30O16	Quercetin glucoside-rhamnoside	Flavonoids	Flavonols	-	164090	170400	171870	177210	147680	354640	362040	276320	90578	93255	99168	83106	70799	86436	228730	272440	222920	63854	79119	94557	106580	86425	108850	214740	186120	203570	146450	114520	104860	141970	165570	114170
Lmmp003783	479.09	478.075	C21H18O13	Quercetin glucuronic acid	Flavonoids	Flavonols	-	463640	440270	419880	462610	460930	9	9	9	9	9	9	9	9	9	9	9	9	9	9	9	9	9	9	9	9	9	1115300	893580	1351300	3095200	2512800	2165900
Lmbp003393	449.11	448.1	C21H20O11	Quercetin-3-O-α-L-rhamnopyranoside	Flavonoids	Flavonols	-	232120	214380	227300	296570	281160	9	9	9	44293	81042	65154	53724	22774	9	9	9	9	136110	133850	119490	67600	56781	100850	9	9	9	651740	926860	1072000	2341500	1880400	1532600
Lmlp002975	597.14	596.137	C26H28O16	Quercetin-3-O-β-D-xylopyranosyl-(1→2)-β-D-galactopyranoside	Flavonoids	Flavonols	-	26956	22315	37064	29408	35984	98103	123500	99695	10271	6081	12840	2568.5	8921.5	4493.5	79852	61004	68643	7701.5	12765	3796.5	9	9	9	63762	61011	50575	19234	28904	14460	7664.5	7674.2	9
pmp000589	551.1	550.074	C24H22O15	Quercetin-7-O-(6'-O-malonyl)-β-D-glucoside	Flavonoids	Flavonols	-	227630	233210	219890	260760	270490	53165	54386	29173	31204	9	22838	9	9	9	12854	15707	9	31322	50526	59051	113500	46883	95165	25702	23791	14446	527820	270790	428310	1749000	1292100	1233700
mws1329	463.09	464.095	C21H20O12	Quercetin-7-O-Glucoside	Flavonoids	Flavonols	491-50-9	34933	37030	36878	35235	25566	15973	19908	18496	9	9360.3	9	4118.3	6429.1	13586	37226	38899	27631	9	9	14698	9	9	9	18962	22239	21851	42817	40060	37243	106370	69374	93198
Hmmp002336	611.16	610.148	C30H26O14	Quercetin-O-feruloyl-Pentoside	Flavonoids	Flavonols	-	157600	165700	178490	177990	192160	386300	445440	302320	100970	128620	124150	72349	62190	97358	223280	192060	204750	114640	117610	82921	109590	116720	110150	200260	237050	203380	146530	117890	130300	163400	156920	138970
Zmhn003162	463.09	464.095	C21H20O12	Quercetin-O-glucoside	Flavonoids	Flavonols	-	22476	22525	28075	22610	26656	16983	20195	17931	6852.9	7863.3	5045	4443.1	7670.6	9305.8	27345	33324	25757	9625.6	8785.1	9709.9	11395	7351	14785	20283	22775	18549	29497	20165	22439	80604	67683	49222
GQ512001	771.13	772.17	C33H40O21	Quercetin-O-rutinoside-hexose	Flavonoids	Flavonols	-	22372	29633	24079	31776	28500	9	9	9	24753	26192	19230	28065	29493	28394	9	9	9	54318	45314	52657	55673	58253	73650	9	9	9	29368	25212	33411	45854	39264	37476
mws0047	579.17	578.137	C27H30O14	Rhoifolin	Flavonoids	Flavonoid	17306-46-6	532650	588130	582190	682840	659610	296360	376780	144480	1274400	1226000	1341500	875440	811130	1235200	181510	170610	91023	579740	184150	482710	529290	230770	521050	366210	398080	145630	1011800	498980	549420	709460	1285200	968550
mws1035	741.22	740.181	C33H40O19	Robinin(Kaempferol-3-O-gal-rham-7-O-rham)	Flavonoids	Flavonols	301-19-9	44548	60343	51841	59808	60471	77103	66365	26993	190810	151610	121250	122490	176630	126870	8710.1	29525	5863.7	83957	67752	79207	73471	68056	77521	5446.6	37986	2931.9	78219	104720	59282	52283	60185	40032
mws0059	609.1	610.126	C27H30O16	Rutin	Flavonoids	Flavonols	153-18-4	27521	40681	34066	35521	28663	89626	91178	64049	19242	18616	15159	16599	18162	25229	34777	47753	37656	19518	13736	12290	24091	18654	19375	49406	48456	40954	18050	21456	15701	24042	29997	15974
pmp000234	527.15	526.125	C27H26O11	Salcolin A	Flavonoids	Flavonoid	-	28753	23895	25559	23287	19870	304470	77177	89484	13095	2540.4	32190	3147.7	9	9	9361.6	27132	9190.8	10131	9	2915.5	7895.9	2679.4	2904.2	3757.4	77318	34200	4645.1	7738	4153.2	9753.1	8827.3	7051.4
pmp000235	527.15	526.125	C27H26O11	Salcolin B	Flavonoids	Flavonoid	-	25586	20125	19432	22308	23971	280440	70232	81276	11308	3911.8	29775	3411.3	9	2364.3	12576	23313	6672.4	14143	3465.7	9	5828.9	9	9	4213.8	77349	32748	9	4148.2	9	6794.2	5032.2	5677.2
Lmzn001903	461.07	462.08	C21H18O12	Scutellarein-7-O-glucuronide	Flavonoids	Flavonoid	27740-01-8	1581600	1454900	1376400	1511000	1434300	9	9	9	46218	21054	9447.8	9	9	9	9	9	9	8119.9	6191.4	4749.6	11951	11841	12234	9	9	9	2503300	1699500	3125800	11931000	7648400	6733200
pmb0565	509.1	508.1	C23H24O13	Syringetin 3-O-hexoside	Flavonoids	Flavonols	-	58695	72634	62796	67940	60524	117380	101460	108250	65712	112170	84494	43219	43902	59710	118010	73165	57928	86237	95104	97983	95971	91525	62569	120490	106880	115410	61699	73817	65527	51925	63736	77238
mws0044	303.06	304.047	C15H12O7	Taxifolin	Flavonoids	Dihydroflavonol	480-18-2	140810	119630	124020	108020	129280	627270	244130	527810	9	9	9	9	4267.3	9	170340	356000	282890	9994.8	16440	13355	15528	12537	9	434730	141260	165700	31000	31935	29175	16795	15501	20705
pmn001702	461.08	462.062	C21H18O12	Tetahydroxy-flavone-7-O-β-D-glucuronide	Flavonoids	Flavonoid	-	1535300	1376300	1228500	1522700	1186800	9	9	9	50349	23176	9972.8	29788	22522	20413	9	9	9	10262	9203.5	10363	20580	10322	13033	9	9	9	2436800	1708300	3120300	12352000	7421700	6312000
Lmnp002413	595.17	594.159	C27H30O15	Tetrahydroxyflavone-C-rhamnosyl-glucoside	Flavonoids	Flavonoid carbonoside	-	36640	41572	38407	21562	34759	26330	81733	32792	31095	48787	46954	34774	43892	62631	24212	22853	7194.8	34638	31538	16398	28694	28053	21538	20938	28688	14528	44916	36936	27186	47393	83373	69124
Lmzp004885	331.08	330.074	C17H14O7	Tricin	Flavonoids	Flavonoid	520-32-1	127150	114590	109090	131420	119700	221840	232100	72363	16158	15041	40160	13512	17230	12115	24825	36484	12564	85255	100540	116790	192420	172270	161700	40261	30564	17093	33890	25356	25455	420950	180020	242610
pmb0745	497.1	496.116	C26H24O10	Tricin 4'-O-syringyl alcohol	Flavonoids	Flavonoid	-	16222	7669.1	12474	11948	11973	175810	32255	47125	12231	4534.7	23573	9	9	9	10962	11846	4674.1	12277	9	9	5079.8	2194.2	9	9	56107	16278	9	3740.5	9	9	3434.6	9
pmb0746	527.1	526.125	C27H26O11	Tricin 4'-O-β-guaiacylglycerol	Flavonoids	Flavonoid	-	25167	22403	15548	19250	20639	271050	74580	74565	12765	2674.7	27340	9	9	9	9662.3	20538	7447.8	11854	9	9	5202.6	9	2260.6	3964	70567	29550	4040.6	9193.5	4918	6044	7006.5	4318.6
pmb3043	637.1	638.155	C29H34O16	Tricin 5-O-rutinoside	Flavonoids	Flavonoid	-	407260	459510	492630	476300	469560	277850	251110	132430	181120	155650	157490	287660	332480	325720	261370	106190	135730	540760	517870	589120	1316400	1148800	1305200	215590	265230	193460	186540	196300	184950	849370	638710	655210
pmb0736	493.1	492.105	C23H24O12	Tricin 7-O-hexoside	Flavonoids	Flavonoid	-	2494900	2732600	2576100	2629700	2952300	47453	237460	35380	2035800	2558000	2143500	1185200	2030400	1834600	114990	70178	79882	5858000	6298400	6447800	7781000	6944900	8873400	69851	147300	67891	3777600	2668100	3749600	6833300	4801100	4505300
pmb0713	655.2	654.149	C29H34O17	Tricin 7-O-hexosyl-O-hexoside	Flavonoids	Flavonoid	-	432680	506610	494130	537460	706040	15166	15122	26448	651780	680230	608100	509650	726380	775620	64434	17596	55392	869960	837420	823360	1034600	1021000	1048400	9	9	9	793610	559000	641440	819150	684560	756280
pmb0716	655.2	654.149	C29H34O17	Tricin di-O-hexoside	Flavonoids	Flavonoid	-	79788	85610	77181	99333	86230	9	9	9	141400	125110	100760	116320	151480	135630	9	9	9	136150	144500	146520	175240	153860	174180	9	9	9	130600	108170	131600	174850	136750	155840
pmb3045	505.1	506.085	C23H22O13	Tricin O-glucuronic acid	Flavonoids	Flavonoid	-	388040	393090	325690	314800	329240	9	9	9	9	9	9	9	9	9	9	9	9	135100	222100	225870	940770	463460	704780	9	9	9	345230	318570	383880	1603200	921940	1030200
pmb0720	579.1	578.103	C26H26O15	Tricin O-malonylhexoside	Flavonoids	Flavonoid	-	71358	77176	74648	66679	62173	9	9	9	9	9	9	9	9	9	9	9	9	18827	24538	13466	40707	34499	38148	9	9	9	91671	66782	81331	597360	340630	433660
pmb3041	521.1	522.08	C23H22O14	Tricin O-saccharic acid	Flavonoids	Flavonoid	-	521450	489930	578180	540600	427380	1366000	1369600	1220200	110240	168460	146080	70598	84343	92724	1382600	1301100	1330500	105450	103010	104960	68991	80698	71969	980140	1323000	770280	110020	134230	115570	71238	96584	103000
pmb0738	699.2	698.155	C34H34O16	Tricin O-sinapoylhexoside	Flavonoids	Flavonoid	-	36432	37003	36361	36704	38892	9	9	9	4155.3	21335	7414.4	9	6842.9	6573.8	9	9	9	52662	79968	77461	100020	103310	112020	9	9	9	16454	11331	13043	42694	34003	20025
Lmzn003538	491.12	492.127	C23H24O12	Tricin-7-O-glucopyranoside	Flavonoids	Flavonoid	32769-01-0	318860	306860	302890	282550	315340	5016.9	24828	3437.2	189540	231330	197430	125110	198680	198910	9630.3	5695.6	7034.6	552400	593930	568460	764070	755840	869030	6921.2	12900	4845.6	351560	328220	369480	495140	406080	445820
Hmgp003086	639.19	638.184	C29H34O16	Tricin-O-Hexoside-O-rhamnoside	Flavonoids	Flavonoid	-	508720	706200	618600	533310	564620	407250	394890	217730	259680	238680	263230	397000	522240	518440	371940	225130	291440	690800	674420	772980	1631300	1453700	2369000	379580	383610	266730	283190	277990	281480	1127300	919140	941200
mws0913	447	448.082	C21H20O11	Trifolin	Flavonoids	Flavonols	23627-87-4	72818	64637	72784	83701	70637	9	9	9	11423	20305	12412	4085.7	5965.8	9	9	9	9	18000	20387	27346	13658	16576	14112	9	9	9	144730	150380	157000	542020	393900	243840
pmp001106	595.17	594.132	C27H30O15	Vitexin-2-O-D-glucopyranoside	Flavonoids	Flavonoid carbonoside	-	38554	39945	39269	50929	37342	14028	11120	10320	75064	74481	60976	77866	85646	72523	27299	8964.2	17598	47220	54529	70871	55569	71095	59425	9	9	9	68385	74305	49751	35492	44038	45428
pme1399	355.15	354.13	C21H22O5	Xanthohumol	Flavonoids	Chalcones	6754-58-1	11234	10871	12302	11978	10031	7071	7076.1	10649	12708	15088	14047	10713	12917	11877	16181	14148	15413	9017.5	9885.2	11292	15082	8548.3	10295	13141	10910	13589	9019.1	12820	9174.1	13471	11558	10451

## Sheet: Supplementary Table 3
Supplementary Table 3. Differentially accumulated metabolites (DAMs) W_I vs B_I								Supplementary Table 3. Differentially accumulated metabolites (DAMs) W_I vs P_I								Supplementary Table 3. Differentially accumulated metabolites (DAMs) B_I vs P_I								Supplementary Table 3. Differentially accumulated metabolites (DAMs) W_II vs B_II								Supplementary Table 3. Differentially accumulated metabolites (DAMs) W_II vs P_II									Supplementary Table 3. Differentially accumulated metabolites (DAMs) B_II vs P_II
Index	Compounds	Class	FC	VIP	Note			Index	Compounds	Class	FC	VIP	Note			Index	Compounds	Class	FC	VIP	Note			Index	Compounds	Class	FC	VIP	Note			Index	Compounds	Class	FC	VIP	Note				Index	Compounds	Class	FC	VIP	Note
mws1422	(-)-Epiafzelechin	Flavonoids	0.234637	1.18043	L			Lmnp002616	5,3',4'-Trihydroxy-6,7-dimethoxyflavone-8-C-[β-D-glucosyl-(1-2)]-β-D-glucoside	Flavonoids	0.00111053	2.04162	L			mws0042	(-)-Epigallocatechin	Flavonoids	12.3449	1.47951	H			Lmnp002919	5,4'-Dihydroxy-6,7-dimethoxyflavone-8-C-[β-D-Xylosyl-(1-2)]-β-D-glucoside	Flavonoids	7659.07	2.97429	H			pmp001311	6-Hydroxykaempferol-7,6-O-Diglucoside	Flavonoids	5.29941	1.0016	H				Lmnp002919	5,4'-Dihydroxy-6,7-dimethoxyflavone-8-C-[β-D-Xylosyl-(1-2)]-β-D-glucoside	Flavonoids	0.000130564	2.717	L
mws0042	(-)-Epigallocatechin	Flavonoids	0.111686	1.45937	L			Lmnp002584	5,7,4'-Trihydroxy-6-methoxyflavone-8-C-[β-D-glucosyl-(1-2)]-β-D-glucoside	Flavonoids	559.556	1.83129	H			mws0049	(+)-Gallocatechin	Flavonoids	11.1954	1.45206	H			Lmnp202580	5,7,4'-Trihydroxyflavone-8-C-[β-D-Xylosyl-(1-2)]-β-D-glucoside	Flavonoids	4.30331	1.16821	H			pmb2992	Acacetin-O-glucuronic acid	Flavonoids	6835.04	2.34172	H				pmb2992	Acacetin-O-glucuronic acid	Flavonoids	6835.04	2.696	H
mws0049	(+)-Gallocatechin	Flavonoids	0.132474	1.40255	L			Lmnp002845	5,7,4'-Trihydroxy-6-methoxyflavone-8-C-β-D-glucoside	Flavonoids	388.148	1.44198	H			Lmnp002616	5,3',4'-Trihydroxy-6,7-dimethoxyflavone-8-C-[β-D-glucosyl-(1-2)]-β-D-glucoside	Flavonoids	0.000432257	2.55956	L			pmb0608	Chrysoeriol O-malonylhexoside	Flavonoids	2.95694	1.75169	H			mws2209	Astragalin (Kaempferol 3-O-Glucoside)	Flavonoids	10.1996	1.19842	H				mws2209	Astragalin (Kaempferol 3-O-Glucoside)	Flavonoids	8.1516	1.31887	H
Lmnp002616	5,3',4'-Trihydroxy-6,7-dimethoxyflavone-8-C-[β-D-glucosyl-(1-2)]-β-D-glucoside	Flavonoids	2.56913	1.39907	H			pmb0624	6-C-Hexosyl-luteolin O-hexoside	Flavonoids	0.123569	2.2869	L			pmb0672	6-C-Hexosyl-apigenin O-feruloylhexoside	Flavonoids	9.59769	1.43438	H			mws1094	Dihydrokaempferol	Flavonoids	812.096	2.57539	H			pmb2999	Chrysoeriol 5-O-hexoside	Flavonoids	15.9909	1.70769	H				pmb2999	Chrysoeriol 5-O-hexoside	Flavonoids	11.5183	1.97086	H
Lmnp002584	5,7,4'-Trihydroxy-6-methoxyflavone-8-C-[β-D-glucosyl-(1-2)]-β-D-glucoside	Flavonoids	1001.41	1.69005	H			pme3475	Butin	Flavonoids	0.161596	1.44925	L			pmb0666	6-C-Hexosyl-apigenin O-sinapoylhexoside	Flavonoids	4.53582	1.16948	H			mws0064	Eriodictyol	Flavonoids	0.157412	2.07382	L			pmb3012	Chrysoeriol 7-O-hexoside	Flavonoids	5.04571	1.00091	H				pmb3012	Chrysoeriol 7-O-hexoside	Flavonoids	4.00206	1.0565	H
Lmnp002845	5,7,4'-Trihydroxy-6-methoxyflavone-8-C-β-D-glucoside	Flavonoids	325.896	1.55593	H			pmb0622	C-Hexosyl-luteolin O-hexoside	Flavonoids	0.342543	1.07625	L			pmb0624	6-C-Hexosyl-luteolin O-hexoside	Flavonoids	0.250732	1.43555	L			pmb3013	Isorhamnetin O-acetyl-hexoside	Flavonoids	268.481	1.95878	H			pmb3007	Chrysoeriol O-glucuronic acid	Flavonoids	503.773	1.99632	H				pmb3007	Chrysoeriol O-glucuronic acid	Flavonoids	276.229	2.15759	H
pmb0672	6-C-Hexosyl-apigenin O-feruloylhexoside	Flavonoids	0.25229	1.19841	L			pmb3012	Chrysoeriol 7-O-hexoside	Flavonoids	0.000600027	2.93643	L			pme3285	Afzelechin(3,5,7,4'-Tetrahydroxyflavan)	Flavonoids	3.42948	1.03161	H			Hmlp002975	Isorhamnetin-O-glucuronate-O-rhamnoside	Flavonoids	3.68701	1.13355	H			pmb0587	Chrysoeriol O-glucuronic acid-O-hexoside	Flavonoids	2383.15	2.1952	H				pmb0587	Chrysoeriol O-glucuronic acid-O-hexoside	Flavonoids	2383.15	2.53148	H
pmb0624	6-C-Hexosyl-luteolin O-hexoside	Flavonoids	0.492832	1.68703	L			pmb0608	Chrysoeriol O-malonylhexoside	Flavonoids	0.165101	2.1227	L			pmb0571	Apigenin O-hexosyl-O-pentoside	Flavonoids	1036.26	2.44713	H			mws1292	Isoschaftoside	Flavonoids	3.06092	1.05073	H			pmb0608	Chrysoeriol O-malonylhexoside	Flavonoids	94.0432	2.08587	H				pmb0608	Chrysoeriol O-malonylhexoside	Flavonoids	31.8042	1.68164	H
pme3285	Afzelechin(3,5,7,4'-Tetrahydroxyflavan)	Flavonoids	0.201281	1.23675	L			pmb0557	Cyanidin 3-(3'',6''-dimalonyl)glucoside	Flavonoids	33334	2.28042	H			pmb2991	Apigenin O-hexosyl-O-rutinoside	Flavonoids	26.1736	2.21221	H			pmp000004	Jaceosidin	Flavonoids	5.56862	1.30297	H			pmb2965	Cyanidin 3-(3",6"-diacetyl-hexoside)-O-glyceric acid	Flavonoids	162.456	1.79529	H				pmb2965	Cyanidin 3-(3",6"-diacetyl-hexoside)-O-glyceric acid	Flavonoids	101.868	1.94774	H
pmb0571	Apigenin O-hexosyl-O-pentoside	Flavonoids	0.001662	2.4764	L			pmb0653	Di-C,C-hexosyl-apigenin	Flavonoids	0.417559	1.04461	L			pmb3012	Chrysoeriol 7-O-hexoside	Flavonoids	0.0007788	2.47619	L			Hmln002483	Kaempferol 3-O-(6′′-O-malonyl)-glucoside	Flavonoids	3.79853	1.36759	H			pmb0557	Cyanidin 3-(3'',6''-dimalonyl)glucoside	Flavonoids	61.4127	1.62458	H				pmb0557	Cyanidin 3-(3'',6''-dimalonyl)glucoside	Flavonoids	54.0072	1.8128	H
pmb2991	Apigenin O-hexosyl-O-rutinoside	Flavonoids	0.0835184	2.18348	L			Zmhp002897	Isochrysoeriol C-hexosyl-O-hexoside	Flavonoids	0.000289917	3.07933	L			pmb0592	Chrysoeriol O-hexosyl-O-rutinoside	Flavonoids	7.87191	1.34288	H			Hmcp001629	Kaempferol-O-Hexoside-O-malonyl-O-Hexoside	Flavonoids	3.27056	1.05652	H			pmf0027	Cyanidin 3-O-galactoside	Flavonoids	802056	2.9071	H				pmf0027	Cyanidin 3-O-galactoside	Flavonoids	802056	3.35072	H
pme3475	Butin	Flavonoids	0.352073	1.00124	L			pmp000700	Isoorientin	Flavonoids	0.000155683	3.14878	L			pmb0608	Chrysoeriol O-malonylhexoside	Flavonoids	0.131741	1.39403	L			mws4167	Luteolin 7-O-glucuronide	Flavonoids	0.312551	1.03705	L			mws1094	Dihydrokaempferol	Flavonoids	742.493	2.02531	H				pmp000583	Diosmetin-7-O-glucuronide	Flavonoids	214.869	2.10939	H
pmb0592	Chrysoeriol O-hexosyl-O-rutinoside	Flavonoids	0.245358	1.18055	L			pmn001645	Isorhamnetin 3-O-β-(2''-O-acetyl-β-D-glucuronide)	Flavonoids	0.276394	1.21165	L			Zmxp002867	Chrysoeriol-di-O-glucoside	Flavonoids	0.00039476	2.57635	L			pmb0562	Pelargonidin 3-(3'',6''-dimalonyl)glucoside	Flavonoids	31178.9	3.20045	H			pmp000583	Diosmetin-7-O-glucuronide	Flavonoids	315.545	1.91282	H				mws0064	Eriodictyol	Flavonoids	9.50243	1.82616	H
Zmxp002867	Chrysoeriol-di-O-glucoside	Flavonoids	2533.19	2.7175	H			Lnrp002670	Isorhamnetin glc-rha	Flavonoids	0.433404	2.60351	L			pme1777	Cyanidin 3,5-O-diglucoside (Cyanin)	Flavonoids	27.1522	1.68322	H			Hmln002199	Quercetin 3-O-(6′′-O-acetyl)-galactoside	Flavonoids	621.811	2.06418	H			pmn001645	Isorhamnetin 3-O-β-(2''-O-acetyl-β-D-glucuronide)	Flavonoids	0.000957145	2.07399	L				pmn001645	Isorhamnetin 3-O-β-(2''-O-acetyl-β-D-glucuronide)	Flavonoids	0.000373852	2.55321	L
pme1777	Cyanidin 3,5-O-diglucoside (Cyanin)	Flavonoids	0.085023	1.54532	L			Zmhp002798	Isosaponarin	Flavonoids	0.372615	1.02934	L			pmb0557	Cyanidin 3-(3'',6''-dimalonyl)glucoside	Flavonoids	33334	1.86045	H			pmb0706	Quercetin 5-O-malonylhexosyl-hexoside	Flavonoids	346.067	2.40471	H			Li512112	Isorhamnetin hexose-malonate	Flavonoids	804.956	2.03968	H				Li512111	Isorhamnetin acetyl hexoside	Flavonoids	4.35604	1.24172	H
pme1773	Cyanidin 3-O-rutinoside (Keracyanin)	Flavonoids	0.148852	1.3614	L			Zmhn003191	Isoscoparin	Flavonoids	0.135072	1.78687	L			pme1773	Cyanidin 3-O-rutinoside (Keracyanin)	Flavonoids	11.6753	1.46207	H			Lmmp002440	Quercetin glucoside-malonyl-glucoside	Flavonoids	5.85302	1.90711	H			pmb3013	Isorhamnetin O-acetyl-hexoside	Flavonoids	1316.4	2.10375	H				Li512112	Isorhamnetin hexose-malonate	Flavonoids	804.956	2.34933	H
mws0744	Dihydromyricetin(Ampelopsin)	Flavonoids	0.155556	1.33165	L			mws1434	Isovitexin	Flavonoids	0.260278	2.26941	L			mws0744	Dihydromyricetin(Ampelopsin)	Flavonoids	8.87999	1.36228	H			pmp000589	Quercetin-7-O-(6'-O-malonyl)-β-D-glucoside	Flavonoids	2.60678	1.31378	H			mws0089	Kaempferol 7-O-glucosdie	Flavonoids	10.244	1.19953	H				pmb3013	Isorhamnetin O-acetyl-hexoside	Flavonoids	4.90313	1.25343	H
pmb3023	Eriodictyol C-hexoside	Flavonoids	0.259064	1.13832	L			pmp000004	Jaceosidin	Flavonoids	0.190693	1.33746	L			pmp000700	Isoorientin	Flavonoids	0.000498679	2.07828	L			mws0047	Rhoifolin	Flavonoids	0.324475	1.0977	L			Lmzn001894	Kaempferol-3-O-β-D-glucuronide	Flavonoids	104.848	1.74476	H				pmp000004	Jaceosidin	Flavonoids	0.27843	1.01484	L
Zmhp002897	Isochrysoeriol C-hexosyl-O-hexoside	Flavonoids	0.000289917	2.80167	L			Hmln002402	Kaempferol 3-O-(6′′-O-malonyl)-galactoside	Flavonoids	0.231516	1.28406	L			Hmjp002133	Isorhamnetin-O-Hexoside-O-Hexoside-O-rhamnoside	Flavonoids	3.39362	1.03516	H			pmp000234	Salcolin A	Flavonoids	0.272983	1.71614	L			pme2459	Luteolin 7-O-glucoside(Cynaroside)	Flavonoids	9.26242	1.17404	H				Hmln002483	Kaempferol 3-O-(6′′-O-malonyl)-glucoside	Flavonoids	0.196967	1.79655	L
Zmhp002409	Isoluteolin-6,8-di-C-glucoside	Flavonoids	0.434341	1.6145	L			Hmln002483	Kaempferol 3-O-(6′′-O-malonyl)-glucoside	Flavonoids	0.256054	1.226	L			Hmcp001658	Isorhamnetin-O-Hexoside-O-malonyl-O-Hexoside	Flavonoids	11.0714	1.73719	H			pmp000235	Salcolin B	Flavonoids	0.39155	1.70031	L			mws4167	Luteolin 7-O-glucuronide	Flavonoids	80.0746	1.66823	H				mws0089	Kaempferol 7-O-glucosdie	Flavonoids	7.89546	1.30832	H
pmp000700	Isoorientin	Flavonoids	0.312191	1.79792	L			pmp001105	Kaempferol-3-neohesperidoside-7-glucoside	Flavonoids	0.000376895	2.99659	L			Zmhn003191	Isoscoparin	Flavonoids	0.303358	1.38788	L			mws0044	Taxifolin	Flavonoids	1473.7	2.68354	H			pmb0562	Pelargonidin 3-(3'',6''-dimalonyl)glucoside	Flavonoids	289122	2.79425	H				Lmzn001894	Kaempferol-3-O-β-D-glucuronide	Flavonoids	328.401	2.19057	H
pmn001645	Isorhamnetin 3-O-β-(2''-O-acetyl-β-D-glucuronide)	Flavonoids	0.214994	1.21096	L			pmp001107	Kaempferol-3-rutinoside-7-glucoside	Flavonoids	0.449238	1.05055	L			mws1434	Isovitexin	Flavonoids	0.276241	2.02072	L			Lmzp004885	Tricin	Flavonoids	4.24032	1.18836	H			pmp000548	Pratensein	Flavonoids	5.84585	1.02569	H				Hmcp001629	Kaempferol-O-Hexoside-O-malonyl-O-Hexoside	Flavonoids	0.31849	1.19408	L
Li512111	Isorhamnetin acetyl hexoside	Flavonoids	0.307996	1.06171	L			Hmcp002029	Kaempferol-O-Pentoside-O-hexoside	Flavonoids	0.317128	1.15049	L			pmp001105	Kaempferol-3-neohesperidoside-7-glucoside	Flavonoids	0.000792602	2.01579	L			pmb0745	Tricin 4'-O-syringyl alcohol	Flavonoids	0.304794	2.15775	L			Hmln002199	Quercetin 3-O-(6′′-O-acetyl)-galactoside	Flavonoids	4402.44	2.28348	H				pme2459	Luteolin 7-O-glucoside(Cynaroside)	Flavonoids	5.12755	1.16362	H
Li512112	Isorhamnetin hexose-malonate	Flavonoids	0.294668	1.08107	L			pmb0691	Luteolin C-hexosyl-O-rhamnoside O-hexoside	Flavonoids	0.39517	1.50332	L			Hmcp001629	Kaempferol-O-Hexoside-O-malonyl-O-Hexoside	Flavonoids	14.7077	2.06131	H			pmb0746	Tricin 4'-O-β-guaiacylglycerol	Flavonoids	0.277515	2.14414	L			Hmln002189	Quercetin 3-O-(6′′-O-malonyl)-galactoside	Flavonoids	16.4782	1.32143	H				mws4167	Luteolin 7-O-glucuronide	Flavonoids	256.197	2.15839	H
Hmcp001658	Isorhamnetin-O-Hexoside-O-malonyl-O-Hexoside	Flavonoids	0.18073	1.71144	L			pmp000126	Luteolin-6,8-di-C-glucoside	Flavonoids	0.232284	2.08303	L			pmp000126	Luteolin-6,8-di-C-glucoside	Flavonoids	0.45276	1.56341	L			pmb3043	Tricin 5-O-rutinoside	Flavonoids	3.33377	1.09062	H			pmb0706	Quercetin 5-O-malonylhexosyl-hexoside	Flavonoids	2033.56	2.17338	H				pmb0562	Pelargonidin 3-(3'',6''-dimalonyl)glucoside	Flavonoids	9.27301	1.33375	H
Zmhn003191	Isoscoparin	Flavonoids	0.445255	1.7282	L			Hmqp003184	Luteolin-O-Malonyl-O-Hexoside-O-Pentoside	Flavonoids	2.07437	1.51392	H			pmn001713	Luteolin-7-O-β-D-rutinoside	Flavonoids	0.00388082	1.8142	L			pmb0736	Tricin 7-O-hexoside	Flavonoids	2.76137	1.00104	H			Lmmp002440	Quercetin glucoside-malonyl-glucoside	Flavonoids	29.7408	1.86313	H				Hmln002199	Quercetin 3-O-(6′′-O-acetyl)-galactoside	Flavonoids	7.08004	1.38401	H
pmp000004	Jaceosidin	Flavonoids	0.146335	1.34129	L			pmf0616	Malvidin 3-(6''-acetyl-glucoside)-5-glucoside	Flavonoids	2.526	1.02427	H			Hmqp003184	Luteolin-O-Malonyl-O-Hexoside-O-Pentoside	Flavonoids	1297.04	2.47926	H			pmb3045	Tricin O-glucuronic acid	Flavonoids	21595.2	3.13893	H			Lmmp003783	Quercetin glucuronic acid	Flavonoids	124451	2.70049	H				Hmln002189	Quercetin 3-O-(6′′-O-malonyl)-galactoside	Flavonoids	7.63971	1.27961	H
Hmln002402	Kaempferol 3-O-(6′′-O-malonyl)-galactoside	Flavonoids	0.201635	1.24425	L			pme2960	Naringenin chalcone	Flavonoids	0.162511	1.45219	L			pmf0616	Malvidin 3-(6''-acetyl-glucoside)-5-glucoside	Flavonoids	9.54626	1.4043	H			pmb0720	Tricin O-malonylhexoside	Flavonoids	2104.85	2.74665	H			Lmbp003393	Quercetin-3-O-α-L-rhamnopyranoside	Flavonoids	13.9147	1.27067	H				pmb0706	Quercetin 5-O-malonylhexosyl-hexoside	Flavonoids	5.8762	1.19539	H
Hmln002483	Kaempferol 3-O-(6′′-O-malonyl)-glucoside	Flavonoids	0.175601	1.28186	L			mws1299	Orientin	Flavonoids	0.35034	1.13326	L			Lmln001801	Myricetin-3,7-O-dirhamnoside	Flavonoids	7.35976	1.9385	H			pmb0738	Tricin O-sinapoylhexoside	Flavonoids	6.38483	1.37248	H			pmp000589	Quercetin-7-O-(6'-O-malonyl)-β-D-glucoside	Flavonoids	22.6993	1.53099	H				Lmmp002440	Quercetin glucoside-malonyl-glucoside	Flavonoids	5.08127	1.14774	H
pmp001105	Kaempferol-3-neohesperidoside-7-glucoside	Flavonoids	0.475516	1.67993	L			pmb2961	Peonidin 3-(6''-malonyl)glucoside	Flavonoids	2.59311	1.02437	H			Lmhp002613	Myricetin-O-glucoside-rhamnoside	Flavonoids	4.8256	1.16254	H			Lmzn003538	Tricin-7-O-glucopyranoside	Flavonoids	2.77339	1.00358	H			mws1329	Quercetin-7-O-Glucoside	Flavonoids	12.8083	1.74172	H				Lmmp003783	Quercetin glucuronic acid	Flavonoids	124451	3.1115	H
GQ512005	Kaempferol-3-O-glucoside-7-O-rhamnoside	Flavonoids	0.367026	1.70977	L			mws0914	Pinobanksin	Flavonoids	0.16221	1.44849	L			pme1793	Pelargonidin 3,5-diglucoside	Flavonoids	3.43144	1.03455	H			Hmgp003086	Tricin-O-Hexoside-O-rhamnoside	Flavonoids	2.80755	1.00882	H			pmp000235	Salcolin B	Flavonoids	0.0925929	1.61335	L				Lmbp003393	Quercetin-3-O-α-L-rhamnopyranoside	Flavonoids	6.80601	1.24665	H
Hmcp001629	Kaempferol-O-Hexoside-O-malonyl-O-Hexoside	Flavonoids	0.0432529	2.28178	L			Hmln002189	Quercetin 3-O-(6′′-O-malonyl)-galactoside	Flavonoids	0.264187	1.96157	L			pmb2961	Peonidin 3-(6''-malonyl)glucoside	Flavonoids	1554.74	2.51964	H											Lmzn001903	Scutellarein-7-O-glucuronide	Flavonoids	95.5242	1.70968	H				pmp000589	Quercetin-7-O-(6'-O-malonyl)-β-D-glucoside	Flavonoids	8.7078	1.31426	H
pmb3024	Luteolin C-hexoside	Flavonoids	0.347765	1.01941	L			mws1035	Robinin(Kaempferol-3-O-gal-rham-7-O-rham)	Flavonoids	0.271995	1.31779	L			Hmln002189	Quercetin 3-O-(6′′-O-malonyl)-galactoside	Flavonoids	511.593	1.86683	H											mws0044	Taxifolin	Flavonoids	3411.48	2.24741	H				mws1329	Quercetin-7-O-Glucoside	Flavonoids	8.16254	1.9806	H
pmn001713	Luteolin-7-O-β-D-rutinoside	Flavonoids	257.678	1.92506	H			pmp000234	Salcolin A	Flavonoids	0.244678	1.39652	L			Lmmp002334	Quercetin glucoside-glucoside-rhamnoside	Flavonoids	3.20725	1.03523	H											pmn001702	Tetahydroxy-flavone-7-O-β-D-glucuronide	Flavonoids	87.0131	1.69309	H				Lmzn001903	Scutellarein-7-O-glucuronide	Flavonoids	384.483	2.21266	H
Hmqp003184	Luteolin-O-Malonyl-O-Hexoside-O-Pentoside	Flavonoids	0.00159932	2.02947	L			pmp000235	Salcolin B	Flavonoids	0.26464	1.3449	L			pmp000589	Quercetin-7-O-(6'-O-malonyl)-β-D-glucoside	Flavonoids	2.23798	1.56335	H											pmb0745	Tricin 4'-O-syringyl alcohol	Flavonoids	0.0931736	1.62712	L				pmn001702	Tetahydroxy-flavone-7-O-β-D-glucuronide	Flavonoids	243.572	2.12508	H
pmf0616	Malvidin 3-(6''-acetyl-glucoside)-5-glucoside	Flavonoids	0.264606	1.14325	L			Lmzp004885	Tricin	Flavonoids	0.167048	1.37367	L			pmb0745	Tricin 4'-O-syringyl alcohol	Flavonoids	2.63422	1.32602	H											pmb3045	Tricin O-glucuronic acid	Flavonoids	38803	2.56299	H				Lmzp004885	Tricin	Flavonoids	0.279925	1.01657	L
Lmln001801	Myricetin-3,7-O-dirhamnoside	Flavonoids	0.113077	2.09819	L			pmb0745	Tricin 4'-O-syringyl alcohol	Flavonoids	0.283687	2.07174	L			pmb0713	Tricin 7-O-hexosyl-O-hexoside	Flavonoids	0.000196475	2.69492	L											pmb0720	Tricin O-malonylhexoside	Flavonoids	8880.89	2.37709	H				pmb0720	Tricin O-malonylhexoside	Flavonoids	4.21925	1.07016	H
Lmhp002613	Myricetin-O-glucoside-rhamnoside	Flavonoids	0.173867	1.29442	L			pmb0746	Tricin 4'-O-β-guaiacylglycerol	Flavonoids	0.247697	1.36948	L			pmp001106	Vitexin-2-O-D-glucopyranoside	Flavonoids	0.000501288	2.5479	L											mws0913	Trifolin	Flavonoids	10.2426	1.20476	H				pmb0738	Tricin O-sinapoylhexoside	Flavonoids	0.194335	1.1526	L
pme2960	Naringenin chalcone	Flavonoids	0.360051	1.00005	L			pmb0713	Tricin 7-O-hexosyl-O-hexoside	Flavonoids	0.000475888	2.97686	L																												mws0913	Trifolin	Flavonoids	6.87798	1.26502	H
mws1299	Orientin	Flavonoids	0.289426	1.10973	L			pmp001106	Vitexin-2-O-D-glucopyranoside	Flavonoids	0.00076125	2.88869	L
pmb2961	Peonidin 3-(6''-malonyl)glucoside	Flavonoids	0.00166787	2.4827	L
mws0914	Pinobanksin	Flavonoids	0.346378	1.01528	L
Hmln002189	Quercetin 3-O-(6′′-O-malonyl)-galactoside	Flavonoids	0.0005164	2.69968	L
Lmmp002334	Quercetin glucoside-glucoside-rhamnoside	Flavonoids	0.342289	1.05384	L
pmp000589	Quercetin-7-O-(6'-O-malonyl)-β-D-glucoside	Flavonoids	0.208961	1.85266	L
mws1035	Robinin(Kaempferol-3-O-gal-rham-7-O-rham)	Flavonoids	0.258703	1.18424	L
pmp000234	Salcolin A	Flavonoids	0.0969675	1.44015	L
pmp000235	Salcolin B	Flavonoids	0.0985336	1.42419	L
Lmzp004885	Tricin	Flavonoids	0.140362	1.34694	L
pmb0745	Tricin 4'-O-syringyl alcohol	Flavonoids	0.107693	1.32972	L
pmb0746	Tricin 4'-O-β-guaiacylglycerol	Flavonoids	0.0895967	1.45792	L
[truncated: 18 more columns]

## Sheet: Supplementary Table 4
Supplementary Table 4. Summary of co-accumulation metabolite clusters.
Metabolite ID	Cluster name
Lmdp003286	Cluster I
Lmhn004976	Cluster I
Lmhn005110	Cluster I
Zmhn003162	Cluster I
Zmhp003514	Cluster I
mws0058	Cluster I
mws0061	Cluster I
mws0064	Cluster I
mws0091	Cluster I
mws1329	Cluster I
pmb0618	Cluster I
pme1399	Cluster I
pmp000002	Cluster I
pmp000548	Cluster I
pmp000596	Cluster I
pmp001309	Cluster I
pmp001311	Cluster I
Lmnp202580	Cluster II
mws1292	Cluster II
pmb0691	Cluster II
pmp000411	Cluster II
pmp001105	Cluster II
pmp001107	Cluster II
Hmln002189	Cluster III
Hmln002199	Cluster III
Lmbp003393	Cluster III
Lmmp002440	Cluster III
Lmmp003783	Cluster III
Lmzn001894	Cluster III
Lmzn001903	Cluster III
Zmxp002867	Cluster III
mws0089	Cluster III
mws0913	Cluster III
mws2209	Cluster III
mws4167	Cluster III
pmb0557	Cluster III
pmb0562	Cluster III
pmb0587	Cluster III
pmb0608	Cluster III
pmb0706	Cluster III
pmb0720	Cluster III
pmb2965	Cluster III
pmb2992	Cluster III
pmb2999	Cluster III
pmb3007	Cluster III
pmb3012	Cluster III
pmb3045	Cluster III
pme2459	Cluster III
pmf0027	Cluster III
pmn001702	Cluster III
pmp000579	Cluster III
pmp000583	Cluster III
pmp000589	Cluster III
GQ512002	Cluster IV
Hmcp001509	Cluster IV
Hmcp001658	Cluster IV
Lmjp003402	Cluster IV
Lmmp002963	Cluster IV
mws0042	Cluster IV
mws0049	Cluster IV
mws0744	Cluster IV
mws1174	Cluster IV
pmp000414	Cluster IV
Hmcp001578	Cluster IX
Hmcp001636	Cluster IX
Hmcp002207	Cluster IX
Hmjp002133	Cluster IX
Hmpp003242	Cluster IX
Li512111	Cluster IX
Li512112	Cluster IX
Lmmp002334	Cluster IX
Lmyn001269	Cluster IX
mws0054	Cluster IX
mws0183	Cluster IX
mws1422	Cluster IX
pmb0565	Cluster IX
pmb3013	Cluster IX
pmb3041	Cluster IX
pme0460	Cluster IX
pme2482	Cluster IX
pme3285	Cluster IX
pmf0374	Cluster IX
pmf0616	Cluster IX
Hmcp001859	Cluster V
Lmnp002584	Cluster V
Lmnp002616	Cluster V
Lmnp002845	Cluster V
Zmhn003191	Cluster V
Zmhp002409	Cluster V
Zmhp002897	Cluster V
mws1299	Cluster V
pmb0571	Cluster V
pmb0588	Cluster V
pmb0622	Cluster V
pmb0624	Cluster V
pmb0628	Cluster V
pmb0713	Cluster V
pmb0716	Cluster V
pmb1108	Cluster V
pmb2961	Cluster V
pmb3024	Cluster V
pme1773	Cluster V
pme1777	Cluster V
pme1793	Cluster V
pmp000120	Cluster V
pmp000126	Cluster V
pmp000127	Cluster V
pmp000241	Cluster V
pmp000595	Cluster V
pmp000700	Cluster V
GQ512001	Cluster VI
Hmcp001629	Cluster VI
Hmcp002268	Cluster VI
Hmgp003086	Cluster VI
Hmlp002975	Cluster VI
Lmdp002969	Cluster VI
Lmnp002919	Cluster VI
Lmzn003538	Cluster VI
pmb0736	Cluster VI
pmb0738	Cluster VI
pmb3043	Cluster VI
Hmcp002029	Cluster VII
Hmln002402	Cluster VII
Hmln002483	Cluster VII
Hmmp002336	Cluster VII
Lmlp002975	Cluster VII
Lmmp003091	Cluster VII
mws0044	Cluster VII
mws0059	Cluster VII
mws0914	Cluster VII
mws1094	Cluster VII
pmb0745	Cluster VII
pmb0746	Cluster VII
pmb3023	Cluster VII
pmb3894	Cluster VII
pme2960	Cluster VII
pme3475	Cluster VII
pmn001583	Cluster VII
pmn001645	Cluster VII
pmp000234	Cluster VII
pmp000235	Cluster VII
GQ512005	Cluster VIII
Hmcp002187	Cluster VIII
Hmqp003184	Cluster VIII
Li512117	Cluster VIII
Lmhp002613	Cluster VIII
Lmln001801	Cluster VIII
Lmlp003201	Cluster VIII
Zmhn003099	Cluster VIII
Zmhp002798	Cluster VIII
mws0047	Cluster VIII
mws1035	Cluster VIII
mws1434	Cluster VIII
mws1661	Cluster VIII
pmb0592	Cluster VIII
pmb0613	Cluster VIII
pmb0620	Cluster VIII
pmb0635	Cluster VIII
pmb0653	Cluster VIII
pmb0662	Cluster VIII
pmb0666	Cluster VIII
pmb0672	Cluster VIII
pmb0682	Cluster VIII
pmb2991	Cluster VIII
pmb2997	Cluster VIII
pmb3002	Cluster VIII
pme0368	Cluster VIII
pmn001713	Cluster VIII
pmp000116	Cluster VIII
pmp000413	Cluster VIII
pmp000594	Cluster VIII
pmp001080	Cluster VIII
pmp001106	Cluster VIII
Lmnp002413	Cluster X
Lmzp004885	Cluster X
Lnrp002670	Cluster X
pmp000004	Cluster X

## Sheet: Supplementary Table 5
Supplementary Table 5. Quality statistics of reads after filtering
Sample	Raw Reads	Clean Reads	Clean Base(G)	Error Rate(%)	Q20(%)	Q30(%)	GC Content(%)
W-I-1	50761200	49602348	7.44	0.02	97.94	94.15	54.84
W-I-2	56166842	53885754	8.08	0.02	97.88	94.06	55.09
W-I-3	57215414	54839910	8.23	0.02	97.92	94.15	55.3
W-II-1	68013640	64371958	9.66	0.02	97.3	92.87	53.32
W-II-2	58270494	56849670	8.53	0.02	97.38	92.88	54.25
W-II-3	67839376	65945250	9.89	0.02	97.25	92.74	53.42
W-III-1	48528246	46661868	7	0.02	97.33	92.96	53.41
W-III-2	54798400	52953242	7.94	0.02	97.3	92.93	54.11
W-III-3	73193910	70640218	10.6	0.02	96.97	92.31	52.36
B-I-1	52025502	50417034	7.56	0.02	97.88	93.98	53.59
B-I-2	57772104	56627942	8.49	0.02	97.85	93.67	54.96
B-I-3	55807104	54233956	8.14	0.02	97.76	93.75	54.37
B-II-1	64293452	61832132	9.27	0.02	97.33	92.97	52.98
B-II-2	55954618	53823016	8.07	0.02	96.75	91.72	52.95
B-II-3	54121802	51916358	7.79	0.02	97.05	92.37	52.07
B-III-1	57777366	55933860	8.39	0.02	97.25	92.89	54.15
B-III-2	63710714	60661112	9.1	0.02	96.92	92.21	52.54
B-III-3	64223288	62070994	9.31	0.02	96.55	91.45	52.25
P-I-1	54561580	53134932	7.97	0.02	97.78	93.83	55.78
P-I-2	56218904	54742932	8.21	0.02	98	94.28	54.24
P-I-3	61108116	59608798	8.94	0.02	97.93	94.13	55.23
P-II-1	55358502	53139880	7.97	0.02	97.19	92.71	52.79
P-II-2	53762320	52060072	7.81	0.02	97.21	92.7	53.23
P-II-3	58803050	56535908	8.48	0.02	97.31	92.93	53.3
P-III-1	51014564	49121160	7.37	0.02	96.85	92.1	52.5
P-III-2	56537474	54271040	8.14	0.02	97.35	93.02	53.67
P-III-3	48743338	46618806	6.99	0.02	97.34	93.02	54.13

## Sheet: Supplementary Table 6
Supplementary Table 6. Differentially expressed genes (DEGs) W_I vs B_I							Supplementary Table 6. Differentially expressed genes (DEGs) W_I vs P_I							Supplementary Table 6. Differentially expressed genes (DEGs) W_II vs B_II							Supplementary Table 6. Differentially expressed genes (DEGs) W_II vs P_II							Supplementary Table 6. Differentially expressed genes (DEGs) W_III vs B_III							Supplementary Table 6. Differentially expressed genes (DEGs) W_III vs P_III
ID	log2FC	FDR	regulated				ID	log2FC	FDR	regulated				ID	log2FC	FDR	regulated				ID	log2FC	FDR	regulated				ID	log2FC	FDR	regulated				ID	log2FC	FDR	regulated
HOVUSG0002800	-1.222	0.00018592	down				HOVUSG0001400	1.336	0.00244206	up				HOVUSG0001000	1.22	0.000167974	up				HOVUSG0001000	1.074	0.000871479	up				HOVUSG0001000	1.278	0.00017915	up				HOVUSG0002800	1.016	0.0171168	up
HOVUSG0009000	-1.195	0.0404173	down				HOVUSG0002500	5.567	0.0499658	up				HOVUSG0020900	-1.263	0.000350867	down				HOVUSG0006400	-2.332	4.08548e-21	down				HOVUSG0002800	1.033	0.0111822	up				HOVUSG0007800	-1.291	0.0279967	down
HOVUSG0009200	1.234	0.0227187	up				HOVUSG0002800	-1.344	0.018241	down				HOVUSG0021000	1.76	0.0188251	up				HOVUSG0009000	-1.579	0.00426068	down				HOVUSG0008100	1.027	0.0142052	up				HOVUSG0008500	2.433	8.34046e-05	up
HOVUSG0010100	1.015	1.53255e-08	up				HOVUSG0003500	-5.696	0.0421311	down				HOVUSG0026000	-1.324	0.00280458	down				HOVUSG0009700	-2.152	0.0495685	down				HOVUSG0008500	1.688	0.0186321	up				HOVUSG0009000	9.034	1.38439e-09	up
HOVUSG0015400	-2.314	0.00234703	down				HOVUSG0019900	-6.76	4.34382e-13	down				HOVUSG0028200	3.695	0.0047533	up				HOVUSG0011000	-1.395	5.50918e-06	down				HOVUSG0009000	9.746	1.74146e-11	up				HOVUSG0019300	5.333	0.00418602	up
HOVUSG0021000	5.238	1.11737e-12	up				HOVUSG0020300	1.343	0.000167864	up				HOVUSG0033000	-1.087	0.00916599	down				HOVUSG0019300	-2.041	0.0282442	down				HOVUSG0009200	6.707	0.000396176	up				HOVUSG0020000	-1.402	0.000188073	down
HOVUSG0031700	-1.057	0.000351482	down				HOVUSG0031800	-1.551	0.00139382	down				HOVUSG0034800	-2.409	0.000328356	down				HOVUSG0022400	-2.432	0.0300479	down				HOVUSG0009700	3.061	0.00854789	up				HOVUSG0021000	3.675	1.37613e-11	up
HOVUSG0031800	-1.051	0.013126	down				HOVUSG0034800	-3.52	3.15422e-12	down				HOVUSG0038000	-1.661	9.15573e-06	down				HOVUSG0023700	-1.848	0.0237326	down				HOVUSG0019300	6.041	2.25431e-05	up				HOVUSG0024200	1.263	0.0160291	up
HOVUSG0034800	-3.649	2.14258e-21	down				HOVUSG0036600	1.704	0.00288809	up				HOVUSG0040600	1.205	0.0265337	up				HOVUSG0027300	-5.863	0.00958403	down				HOVUSG0020800	1.1	0.00239017	up				HOVUSG0026000	2.549	3.08968e-07	up
HOVUSG0038000	-1.492	0.00113591	down				HOVUSG0038000	1.378	0.00470314	up				HOVUSG0041600	1.54	0.000231812	up				HOVUSG0028700	-2.976	0.0402275	down				HOVUSG0020900	-1.146	0.0018819	down				HOVUSG0034200	1.554	0.00229931	up
HOVUSG0039800	5.384	0.0221676	up				HOVUSG0041600	1.467	0.000186476	up				HOVUSG0043400	3.128	0.0301372	up				HOVUSG0032100	-1.314	1.51906e-05	down				HOVUSG0021000	3.38	1.13001e-08	up				HOVUSG0034800	-2.618	5.96407e-13	down
HOVUSG0040100	1.113	1.45953e-05	up				HOVUSG0043400	-2.263	0.00520267	down				HOVUSG0045500	-1.141	0.000348481	down				HOVUSG0037100	8.76	4.02473e-10	up				HOVUSG0026000	2.059	0.000359963	up				HOVUSG0037100	8.306	1.75071e-08	up
HOVUSG0040500	-1.94	2.85826e-09	down				HOVUSG0044200	1.399	0.000283714	up				HOVUSG0052200	9.413	5.45034e-12	up				HOVUSG0038000	-1.17	0.0108609	down				HOVUSG0026800	1.136	0.00462875	up				HOVUSG0038000	-1.187	0.0153979	down
HOVUSG0041600	1.228	0.0023905	up				HOVUSG0049500	-1.476	2.40093e-05	down				HOVUSG0055000	3.224	0.000202313	up				HOVUSG0043400	2.304	0.00027484	up				HOVUSG0028200	4.599	0.00327376	up				HOVUSG0039000	-1.868	2.72865e-05	down
HOVUSG0044300	1.577	0.00348448	up				HOVUSG0055400	-1.357	0.00157955	down				HOVUSG0055400	1.001	0.0293832	up				HOVUSG0044300	2.3	0.0260935	up				HOVUSG0034200	1.302	0.00588173	up				HOVUSG0045500	1.203	0.000120574	up
HOVUSG0048800	-1.387	0.000124282	down				HOVUSG0058000	1.422	0.00367969	up				HOVUSG0058400	1.909	0.000745191	up				HOVUSG0045500	-2.119	5.12058e-15	down				HOVUSG0034800	-5.382	3.90344e-34	down				HOVUSG0046800	2.131	1.94415e-06	up
HOVUSG0049500	-1.285	1.93932e-09	down				HOVUSG0065000	1.414	0.000716029	up				HOVUSG0065200	1.67	9.99487e-05	up				HOVUSG0055000	2.813	0.00266669	up				HOVUSG0036200	1.307	0.0299149	up				HOVUSG0048800	2.201	1.84649e-08	up
HOVUSG0052200	10.038	1.8771e-14	up				HOVUSG0065200	-1.703	0.00014337	down				HOVUSG0075600	-2.694	0.0100623	down				HOVUSG0058400	1.39	0.0379649	up				HOVUSG0037200	-1.511	0.0343276	down				HOVUSG0049500	1.826	0.00600741	up
HOVUSG0053700	2.188	0.0332167	up				HOVUSG0068300	-1.277	0.00114017	down				HOVUSG0078200	2.374	0.000135086	up				HOVUSG0065200	2.03	0.000672286	up				HOVUSG0038000	-3.504	1.60781e-17	down				HOVUSG0060900	2.027	6.34746e-07	up
HOVUSG0058000	-7.048	4.30874e-09	down				HOVUSG0074000	-7.331	6.72453e-09	down				HOVUSG0079000	-2.533	0.00767599	down				HOVUSG0072700	1.01	0.000269194	up				HOVUSG0041600	1.815	0.000158558	up				HOVUSG0065000	1.005	0.0426535	up
HOVUSG0060900	-1.259	0.000185735	down				HOVUSG0074700	-1.519	5.58973e-05	down				HOVUSG0079400	9.029	0.000259458	up				HOVUSG0074000	-10.076	2.43568e-14	down				HOVUSG0042900	1.478	0.0280288	up				HOVUSG0066900	3.857	1.40366e-11	up
HOVUSG0074400	-1.717	3.71475e-13	down				HOVUSG0074800	-8.043	1.33443e-07	down				HOVUSG0079800	-2.103	1.53076e-35	down				HOVUSG0074800	-5.938	0.00525544	down				HOVUSG0043100	-3.962	0.025476	down				HOVUSG0069100	-1.545	6.3452e-05	down
HOVUSG0075900	-3.127	0.00172658	down				HOVUSG0075600	1.612	0.010311	up				HOVUSG0080900	-1.692	0.0257325	down				HOVUSG0076100	-1.543	0.00135022	down				HOVUSG0043400	2.171	2.32914e-05	up				HOVUSG0072800	3.623	0.0258423	up
HOVUSG0077200	-6.248	0.000847781	down				HOVUSG0075900	-3.21	0.0218238	down				HOVUSG0100100	4.46	0.0378392	up				HOVUSG0076200	4.96	1.48211e-22	up				HOVUSG0046800	2.113	7.51876e-07	up				HOVUSG0073700	-1.076	0.0038096	down
HOVUSG0078200	2.438	0.00477192	up				HOVUSG0077100	3.413	0.00452817	up				HOVUSG0103700	-5.293	0.0401505	down				HOVUSG0077200	-6.092	0.00197035	down				HOVUSG0048800	2.419	6.81124e-09	up				HOVUSG0074000	-10.501	1.70825e-15	down
HOVUSG0079000	-2.854	0.00594028	down				HOVUSG0077200	-6.278	0.00372654	down				HOVUSG0116300	7.862	3.78991e-07	up				HOVUSG0078200	2.252	9.80959e-05	up				HOVUSG0049500	2.411	1.45284e-05	up				HOVUSG0074800	-5.724	0.0195398	down
HOVUSG0079100	-1.613	0.00165208	down				HOVUSG0078200	2.509	0.0169257	up				HOVUSG0119500	-1.368	0.040143	down				HOVUSG0079400	7.953	0.00131595	up				HOVUSG0051300	1.093	0.00505381	up				HOVUSG0076200	6.567	1.71056e-12	up
HOVUSG0079200	-1.483	0.00217319	down				HOVUSG0079200	-1.623	2.87635e-06	down				HOVUSG0126700	-1.317	0.0426684	down				HOVUSG0079800	-2.293	6.6141e-46	down				HOVUSG0052200	9.179	8.11896e-11	up				HOVUSG0077200	-6.447	0.00158391	down
HOVUSG0079400	14.701	1.31565e-31	up				HOVUSG0079400	14.763	1.86132e-31	up				HOVUSG0127400	3.082	0.000263596	up				HOVUSG0090600	-2.691	0.0268455	down				HOVUSG0055000	2.758	0.000794249	up				HOVUSG0077600	-1.015	0.0039189	down
HOVUSG0079800	-2.625	8.96283e-103	down				HOVUSG0079800	-2.103	2.61099e-27	down				HOVUSG0137200	1.125	0.00741641	up				HOVUSG0092200	-3.962	0.0103744	down				HOVUSG0058400	1.539	0.00725231	up				HOVUSG0078200	2.317	0.000346017	up
HOVUSG0080900	-1.093	0.00254926	down				HOVUSG0099900	1.006	0.00800474	up				HOVUSG0139000	-1.495	1.44307e-06	down				HOVUSG0102000	-1.081	0.000120571	down				HOVUSG0060900	2.405	8.97377e-12	up				HOVUSG0079400	13.022	2.02312e-24	up
HOVUSG0087800	-3.804	0.0280044	down				HOVUSG0102500	-7.369	1.21194e-05	down				HOVUSG0143400	-1.102	0.0457062	down				HOVUSG0102500	-1.919	0.0385794	down				HOVUSG0066900	2.424	0.0029401	up				HOVUSG0079800	-2.064	1.49273e-17	down
HOVUSG0088200	1.701	0.0020849	up				HOVUSG0103700	-7.166	4.96744e-05	down				HOVUSG0148700	5.522	0.0373954	up				HOVUSG0102700	1.002	6.81493e-07	up				HOVUSG0069100	-1.506	0.00053175	down				HOVUSG0092700	-1.692	0.000284937	down
HOVUSG0090500	-1.041	3.59102e-05	down				HOVUSG0110900	-4.037	0.00715636	down				HOVUSG0149300	5.434	0.0494297	up				HOVUSG0103700	-5.41	0.0210275	down				HOVUSG0075400	1.321	0.0146303	up				HOVUSG0095700	-1.037	0.0155189	down
HOVUSG0099600	1.74	0.0228898	up				HOVUSG0111300	2.701	2.73015e-05	up				HOVUSG0150300	5.795	0.0131981	up				HOVUSG0111300	1.14	3.69375e-06	up				HOVUSG0077200	-6.534	0.00154512	down				HOVUSG0100100	-6.484	0.00145366	down
HOVUSG0103700	-7.134	1.08906e-05	down				HOVUSG0125000	-2.324	0.000164741	down				HOVUSG0150400	-1.774	0.000554903	down				HOVUSG0116300	6.376	0.00158066	up				HOVUSG0077400	-1.929	0.00869416	down				HOVUSG0103700	-6.048	0.00574927	down
HOVUSG0104200	1.081	4.22551e-10	up				HOVUSG0125200	-2.34	3.92779e-05	down				HOVUSG0150900	-1.308	1.49429e-05	down				HOVUSG0116700	-2.102	0.0068136	down				HOVUSG0077600	-1.209	0.00121576	down				HOVUSG0107200	1.226	0.0013728	up
HOVUSG0105900	-2.893	0.0409004	down				HOVUSG0126600	-1.186	0.000195559	down				HOVUSG0151300	-1.516	0.000127606	down				HOVUSG0119200	-1.189	0.00523543	down				HOVUSG0078200	2.529	6.32649e-05	up				HOVUSG0107600	1.22	0.0285105	up
HOVUSG0119400	1.157	6.83012e-08	up				HOVUSG0127700	-9.289	3.74293e-11	down				HOVUSG0151400	-4.988	1.09238e-11	down				HOVUSG0119500	-1.812	0.0438168	down				HOVUSG0079000	-3.669	0.000681866	down				HOVUSG0109300	1.481	0.00580362	up
HOVUSG0122800	1.268	0.000295741	up				HOVUSG0129000	-6.659	1.45059e-16	down				HOVUSG0153400	6.748	0.000290844	up				HOVUSG0121800	1.04	0.000643909	up				HOVUSG0079100	-1.517	0.00212487	down				HOVUSG0111300	1.34	0.0304513	up
HOVUSG0124600	-5.804	0.00483314	down				HOVUSG0129600	-1.79	0.0432197	down				HOVUSG0154000	-2.106	1.92768e-13	down				HOVUSG0124400	-2.225	4.2645e-10	down				HOVUSG0079200	-1.808	3.12666e-06	down				HOVUSG0116300	7.936	3.39452e-07	up
HOVUSG0125000	-2.882	4.18061e-06	down				HOVUSG0131100	-2.676	0.0269007	down				HOVUSG0159500	6.264	0.00310188	up				HOVUSG0125100	2.945	0.0128179	up				HOVUSG0079400	13.966	5.04371e-28	up				HOVUSG0121500	1.479	0.0400621	up
HOVUSG0125200	-2.028	0.000433759	down				HOVUSG0131600	-1.112	0.00753974	down				HOVUSG0164500	1.871	0.0275547	up				HOVUSG0127800	1.269	3.45747e-10	up				HOVUSG0079800	-2.197	8.6281e-17	down				HOVUSG0124600	-4.212	0.0375778	down
HOVUSG0127700	-1.297	0.00463807	down				HOVUSG0133200	2.037	0.023037	up				HOVUSG0164800	1.721	1.18148e-05	up				HOVUSG0130700	1.271	9.4202e-06	up				HOVUSG0088500	-1.722	0.0466212	down				HOVUSG0125200	-1.075	0.0493875	down
HOVUSG0129000	-1.413	0.02263	down				HOVUSG0137100	-2.389	3.42157e-09	down				HOVUSG0169900	-5.412	0.0345885	down				HOVUSG0132600	2.882	0.00303937	up				HOVUSG0092700	-1.393	0.00365887	down				HOVUSG0125500	-2.512	2.21469e-06	down
HOVUSG0129400	-1.217	0.0388663	down				HOVUSG0137300	2.292	0.0276704	up				HOVUSG0170900	5.276	0.00214231	up				HOVUSG0138600	1.218	0.000174246	up				HOVUSG0103700	-6.136	0.00571984	down				HOVUSG0125900	-2.835	0.047782	down
HOVUSG0129600	-2.226	0.00305395	down				HOVUSG0144000	-5.655	0.0482257	down				HOVUSG0171000	10.132	2.11705e-14	up				HOVUSG0139000	-1.425	0.00269893	down				HOVUSG0116300	8.371	3.66028e-08	up				HOVUSG0129300	-1.463	3.03287e-08	down
HOVUSG0136900	-1.904	0.00520049	down				HOVUSG0147700	-1.532	2.58147e-05	down				HOVUSG0171200	6.968	7.99155e-05	up				HOVUSG0139900	-1.052	0.031518	down				HOVUSG0124400	2.05	0.000232449	up				HOVUSG0132600	-3.439	0.0115297	down
HOVUSG0137100	-1.442	1.27686e-06	down				HOVUSG0149200	-3.249	6.22857e-16	down				HOVUSG0171300	6.124	0.00798215	up				HOVUSG0144300	-1.075	0.00161231	down				HOVUSG0124600	-5.759	2.21543e-13	down				HOVUSG0136800	-1.787	1.2876e-05	down
HOVUSG0137700	-4.164	0.00742204	down				HOVUSG0149300	6.12	0.00813095	up				HOVUSG0173000	6.327	0.00302715	up				HOVUSG0147800	-1.59	0.0277298	down				HOVUSG0125500	-2.406	2.47442e-06	down				HOVUSG0137700	-3.104	0.024614	down
HOVUSG0141800	1.807	0.00619028	up				HOVUSG0149500	-3.561	0.0247157	down				HOVUSG0190300	1.835	2.7326e-07	up				HOVUSG0148400	5.494	0.0282943	up				HOVUSG0125900	-3.373	0.00847145	down				HOVUSG0138600	2.364	5.03563e-07	up
HOVUSG0143400	-2.08	0.00596584	down				HOVUSG0149800	1.388	0.0458771	up				HOVUSG0201000	4.09	0.00837955	up				HOVUSG0148500	2.126	0.024923	up				HOVUSG0126000	-3.052	5.53112e-05	down				HOVUSG0139200	-1.24	4.24537e-06	down
HOVUSG0144000	-5.622	0.0194318	down				HOVUSG0150200	-1.82	0.00505934	down				HOVUSG0203500	1.029	0.00351901	up				HOVUSG0148700	5.96	0.00714013	up				HOVUSG0127400	2.006	0.00313833	up				HOVUSG0144000	-7.291	1.03516e-05	down
HOVUSG0148300	1.026	0.00137035	up				HOVUSG0150400	-1.814	1.9104e-08	down				HOVUSG0206500	1.093	0.00874116	up				HOVUSG0149300	5.341	0.0395418	up				HOVUSG0129300	-1.252	0.000252797	down				HOVUSG0147800	3.509	0.000786646	up
HOVUSG0148700	6.669	0.000415423	up				HOVUSG0152900	1.411	1.79595e-06	up				HOVUSG0207600	-1.563	0.00102009	down				HOVUSG0150300	6.072	0.0031794	up				HOVUSG0131200	1.379	0.0362411	up				HOVUSG0148200	1.886	0.0205437	up
HOVUSG0149500	-2.905	0.0112123	down				HOVUSG0163800	6.558	0.00364527	up				HOVUSG0208600	-12.916	4.60305e-24	down				HOVUSG0150400	-1.733	0.000249371	down				HOVUSG0136800	-1.394	0.0060396	down				HOVUSG0148300	1.835	0.000428332	up
HOVUSG0150200	1.501	6.91269e-10	up				HOVUSG0169700	-1.416	0.0339392	down				HOVUSG0209200	1.11	0.00584362	up				HOVUSG0150900	-1.353	1.32422e-06	down				HOVUSG0137700	-2.665	0.031934	down				HOVUSG0148700	6.091	0.0036002	up
HOVUSG0150300	5.22	0.0367864	up				HOVUSG0171000	7.636	1.60088e-22	up				HOVUSG0209900	8.758	1.59725e-09	up				HOVUSG0151300	-1.322	6.63279e-07	down				HOVUSG0139200	-1.386	1.17537e-06	down				HOVUSG0149200	-1.859	0.0103159	down
HOVUSG0150400	-1.578	1.66019e-08	down				HOVUSG0173000	7.018	0.000131309	up				HOVUSG0210400	12.932	4.60305e-24	up				HOVUSG0151400	-4.924	5.87279e-13	down				HOVUSG0144000	-7.378	1.02263e-05	down				HOVUSG0149300	5.885	0.00830986	up
HOVUSG0151400	-4.558	7.24821e-05	down				HOVUSG0174700	7.539	3.02427e-05	up				HOVUSG0214000	-1.13	7.05284e-06	down				HOVUSG0151600	-1.048	0.00167824	down				HOVUSG0147700	4.635	0.0286102	up				HOVUSG0150600	6.393	0.00116593	up
HOVUSG0153400	4.95	0.00200218	up				HOVUSG0185700	1.318	0.00639588	up				HOVUSG0216500	-1.35	0.0210958	down				HOVUSG0153400	6.715	0.000182742	up				HOVUSG0147800	3.304	0.0105046	up				HOVUSG0151300	-1.081	0.0168136	down
HOVUSG0154200	2.684	6.93638e-07	up				HOVUSG0187500	1.16	0.00972801	up				HOVUSG0216800	1.265	0.0127909	up				HOVUSG0154000	-3.353	9.94039e-30	down				HOVUSG0148300	1.634	0.00525176	up				HOVUSG0151400	-3.289	1.39472e-11	down
HOVUSG0158100	-2.816	1.74424e-05	down				HOVUSG0189700	-1.543	0.0181241	down				HOVUSG0218000	-2.449	0.022627	down				HOVUSG0154200	1.828	0.000577812	up				HOVUSG0148700	6.004	0.00723536	up				HOVUSG0152900	2.088	0.000386429	up
HOVUSG0160800	-2.033	0.000440529	down				HOVUSG0189800	-1.485	0.00428366	down				HOVUSG0219000	-1.224	0.00178207	down				HOVUSG0156000	1.283	0.0469411	up				HOVUSG0149200	-1.569	0.0241725	down				HOVUSG0153400	6.795	0.000219451	up
HOVUSG0165900	-1.002	3.15192e-06	down				HOVUSG0200100	-1.295	0.0196875	down				HOVUSG0219100	-9.728	1.84032e-13	down				HOVUSG0157200	-1.426	0.0198239	down				HOVUSG0151300	-1.438	5.55929e-05	down				HOVUSG0154000	-1.126	0.0149822	down
HOVUSG0167000	-1.323	0.00407355	down				HOVUSG0205700	-1.532	0.0275827	down				HOVUSG0223700	5.626	0.0373535	up				HOVUSG0159500	5.966	0.00855797	up				HOVUSG0151400	-4.25	3.839e-19	down				HOVUSG0154200	2.417	5.45788e-06	up
HOVUSG0167100	-1.453	0.0060339	down				HOVUSG0206400	-1.461	0.00424861	down				HOVUSG0224000	-1.021	0.00490379	down				HOVUSG0164800	1.26	5.53427e-05	up				HOVUSG0152900	1.66	0.00260027	up				HOVUSG0157300	-1.041	0.00632527	down
HOVUSG0170800	1.294	3.39983e-11	up				HOVUSG0208600	-13.915	8.56008e-12	down				HOVUSG0226500	-1.247	0.000245234	down				HOVUSG0167200	5.834	0.0073203	up				HOVUSG0153400	6.339	0.00196111	up				HOVUSG0157600	-1.094	0.00688027	down
HOVUSG0170900	5.152	0.0425868	up				HOVUSG0209200	1.538	3.4031e-05	up				HOVUSG0226700	1.944	0.0243913	up				HOVUSG0169700	-1.552	1.4981e-05	down				HOVUSG0154000	-1.014	0.0301853	down				HOVUSG0164800	-1.296	0.0183472	down
HOVUSG0171000	7.666	4.37567e-21	up				HOVUSG0209400	-2.982	0.0161207	down				HOVUSG0236000	1.92	0.0390564	up				HOVUSG0170900	5.925	2.29776e-05	up				HOVUSG0156000	1.456	0.00788329	up				HOVUSG0166600	1.865	0.0202009	up
HOVUSG0173000	7.399	5.01462e-06	up				HOVUSG0209900	3.067	3.08565e-11	up				HOVUSG0245000	1.867	0.000484296	up				HOVUSG0171000	10.144	1.41834e-14	up				HOVUSG0164800	-1.183	0.0292082	down				HOVUSG0167200	6.436	0.00108131	up
HOVUSG0176500	5.24	0.0366264	up				HOVUSG0210400	13.01	2.98228e-24	up				HOVUSG0245700	3.659	0.0389831	up				HOVUSG0171200	5.594	0.0168915	up				HOVUSG0166600	1.972	0.0251076	up				HOVUSG0170900	9.199	2.74247e-11	up
HOVUSG0184000	-1.482	0.0414791	down				HOVUSG0216800	-1.667	0.000968446	down				HOVUSG0252500	1.01	0.0262742	up				HOVUSG0171300	5.557	0.027634	up				HOVUSG0170900	7.584	2.78124e-06	up				HOVUSG0171000	11.083	2.38429e-17	up
HOVUSG0189700	-2.356	1.45311e-05	down				HOVUSG0219100	-9.211	6.49961e-11	down				HOVUSG0253100	1.175	0.00139701	up				HOVUSG0173000	6.209	0.00259064	up				HOVUSG0171000	10.184	3.39428e-14	up				HOVUSG0171200	8.494	1.10397e-08	up
HOVUSG0189800	-2.185	8.64507e-07	down				HOVUSG0220400	-2.206	0.00132597	down				HOVUSG0253900	1.154	0.0126779	up				HOVUSG0182600	-1.047	0.0116209	down				HOVUSG0171200	6.806	0.000231911	up				HOVUSG0171300	7.317	8.89584e-06	up
HOVUSG0193000	3.534	0.00288181	up				HOVUSG0223800	-1.478	0.000935828	down				HOVUSG0263700	1.171	0.0389831	up				HOVUSG0187300	-1.952	1.73677e-14	down				HOVUSG0171300	5.974	0.0132065	up				HOVUSG0171800	5.602	0.0203015	up
HOVUSG0202600	-1.259	0.00722186	down				HOVUSG0225300	1.68	2.37405e-05	up				HOVUSG0266000	-1.007	0.00150778	down				HOVUSG0190300	1.833	3.52265e-09	up				HOVUSG0171800	5.869	0.0112119	up				HOVUSG0172000	3.17	0.000282538	up
HOVUSG0202700	-1.231	7.30159e-05	down				HOVUSG0233100	2.109	0.00952144	up				HOVUSG0266400	1.448	0.000415904	up				HOVUSG0195500	-1.984	0.00964456	down				HOVUSG0172000	3.949	2.22833e-09	up				HOVUSG0172300	4.413	1.05926e-08	up
HOVUSG0203500	1.166	8.58208e-05	up				HOVUSG0242200	-1.713	0.0002049	down				HOVUSG0268400	-1.289	0.0406432	down				HOVUSG0198100	9.3	6.64596e-12	up				HOVUSG0173000	5.553	0.035482	up				HOVUSG0172600	3.719	5.8277e-21	up
HOVUSG0204200	-1.234	2.16047e-07	down				HOVUSG0245700	-2.77	1.38655e-05	down				HOVUSG0269300	-1.753	0.00674529	down				HOVUSG0203500	1.474	0.000158193	up				HOVUSG0173600	1.899	0.00137458	up				HOVUSG0172700	2.496	6.11871e-17	up
HOVUSG0206400	-2.48	1.6881e-25	down				HOVUSG0253900	-1.786	0.00102922	down				HOVUSG0273500	-1.286	0.000442355	down				HOVUSG0204900	1.979	0.0131874	up				HOVUSG0175700	-2.625	6.27651e-08	down				HOVUSG0173000	5.622	0.0195894	up
HOVUSG0208600	-13.881	6.30838e-12	down				HOVUSG0261800	-8.676	4.15684e-09	down				HOVUSG0277800	1.833	0.00167124	up				HOVUSG0208600	1.429	8.57461e-06	up				HOVUSG0182100	-1.216	0.000103896	down				HOVUSG0173600	1.754	0.000180797	up
HOVUSG0209100	-1.589	0.0305877	down				HOVUSG0263200	-1.398	0.0364998	down				HOVUSG0279700	1.783	3.9152e-08	up				HOVUSG0209100	1.074	0.00674867	up				HOVUSG0186600	-1.344	0.000225596	down				HOVUSG0182100	-1.212	6.20163e-05	down
HOVUSG0209200	1.533	1.77558e-07	up				HOVUSG0266000	1.802	0.0416863	up				HOVUSG0287400	-1.875	1.58438e-07	down				HOVUSG0214000	-2.309	2.47721e-29	down				HOVUSG0190000	1.11	0.0431603	up				HOVUSG0186600	-1.497	5.07654e-05	down
HOVUSG0209400	-1.585	0.02634	down				HOVUSG0268700	-1.44	0.0456809	down				HOVUSG0288500	6.135	0.00397489	up				HOVUSG0215100	-1.359	1.94635e-13	down				HOVUSG0190300	1.224	0.000340416	up				HOVUSG0188600	2.354	1.08337e-05	up
HOVUSG0209900	2.88	8.68826e-10	up				HOVUSG0269000	1.912	0.00693519	up				HOVUSG0290400	1.448	0.037	up				HOVUSG0216500	-1.137	0.0110469	down				HOVUSG0195500	2.817	0.0151973	up				HOVUSG0195500	2.742	0.0330072	up
HOVUSG0210400	12.471	8.28489e-23	up				HOVUSG0270700	-1.782	1.87149e-05	down				HOVUSG0292600	6.914	0.000128924	up				HOVUSG0218600	-2.676	1.36099e-09	down				HOVUSG0202600	-1.194	0.0265424	down				HOVUSG0198100	8.137	2.53689e-08	up
HOVUSG0214000	-1.469	0.0268819	down				HOVUSG0279700	-1.519	0.027736	down				HOVUSG0293600	-1.71	1.77505e-05	down				HOVUSG0219100	-7.634	5.72803e-24	down				HOVUSG0205700	1.32	0.015298	up				HOVUSG0200100	1.049	0.00425056	up
HOVUSG0216800	-1.315	0.00110228	down				HOVUSG0290800	-8.802	7.1344e-10	down				HOVUSG0294100	-3.718	2.81648e-12	down				HOVUSG0226500	-1.819	1.29646e-05	down				HOVUSG0206400	2.076	0.00087715	up				HOVUSG0206400	2.563	2.40395e-06	up
HOVUSG0219100	-9.179	2.08326e-11	down				HOVUSG0291100	3.274	1.06365e-07	up				HOVUSG0302500	-6.696	0.000253057	down				HOVUSG0226700	1.644	0.0498574	up				HOVUSG0207100	-1.752	4.4185e-05	down				HOVUSG0207100	-1.014	0.0168958	down
HOVUSG0224100	1.288	3.3455e-06	up				HOVUSG0292500	-1.389	0.00821377	down				HOVUSG0302800	-9.378	4.15953e-12	down				HOVUSG0227200	-1.096	0.00061437	down				HOVUSG0207600	-1.858	1.82437e-06	down				HOVUSG0218000	3.838	0.00272528	up
HOVUSG0224500	1.496	0.025945	up				HOVUSG0294900	-3.24	0.000334467	down				HOVUSG0303900	-1.243	3.16561e-05	down				HOVUSG0227700	-1.116	1.50089e-06	down				HOVUSG0207800	-1.044	0.0373233	down				HOVUSG0219100	-6.724	5.15775e-58	down
HOVUSG0225200	-1.053	0.00363908	down				HOVUSG0295800	-1.725	0.000362281	down				HOVUSG0311100	6.561	1.00343e-06	up				HOVUSG0231300	1.079	0.0126638	up				HOVUSG0208600	-12.051	7.67912e-20	down				HOVUSG0219600	1.351	6.66246e-05	up
HOVUSG0247600	-1.404	0.00478373	down				HOVUSG0314100	10.335	3.6913e-13	up				HOVUSG0314100	9.243	1.85605e-11	up				HOVUSG0232200	5.248	0.0411623	up				HOVUSG0209900	8.449	5.72715e-08	up				HOVUSG0221000	2.392	0.0167911	up
HOVUSG0249300	-1.777	0.00870501	down				HOVUSG0320900	-5.233	4.6272e-06	down				HOVUSG0316000	3.365	0.0224269	up				HOVUSG0233100	-1.319	2.49139e-06	down				HOVUSG0210400	12.606	1.12873e-22	up				HOVUSG0225300	1.392	0.00143626	up
HOVUSG0252000	-3.811	0.0164496	down				HOVUSG0322100	8.424	5.18993e-08	up				HOVUSG0317900	-2.146	3.37525e-05	down				HOVUSG0242200	-1.372	0.0148939	down				HOVUSG0219100	-8.414	2.6336e-40	down				HOVUSG0228200	-7.168	2.4841e-08	down
HOVUSG0254200	-1.521	0.0308812	down				HOVUSG0329600	-7.193	4.15065e-05	down				HOVUSG0318600	4.84	0.0437431	up				HOVUSG0250700	-5.613	9.90603e-07	down				HOVUSG0220100	-1.624	1.06189e-06	down				HOVUSG0245000	-1.554	0.0204902	down
HOVUSG0260900	1.31	0.00256701	up				HOVUSG0329700	-9.091	9.04534e-11	down				HOVUSG0319100	-1.358	0.0224265	down				HOVUSG0253100	2.299	1.40961e-16	up				HOVUSG0221000	2.452	0.0105078	up				HOVUSG0245500	-1.823	5.57799e-05	down
HOVUSG0261600	1.684	0.0488307	up				HOVUSG0330500	2.604	0.00895482	up				HOVUSG0327900	3.637	0.0109583	up				HOVUSG0254000	5.624	0.0351968	up				HOVUSG0223900	1.014	0.00118582	up				HOVUSG0250800	3.573	0.0263518	up
HOVUSG0263600	-1.2	0.0447124	down				HOVUSG0330600	1.297	0.0138052	up				HOVUSG0338400	-4.155	0.00496626	down				HOVUSG0260000	1.562	0.00509695	up				HOVUSG0225300	1.542	0.01805	up				HOVUSG0253100	1.959	5.78494e-08	up
HOVUSG0264800	-1.155	0.00619022	down				HOVUSG0339600	-1.027	0.010787	down				HOVUSG0338800	1.014	0.0101332	up				HOVUSG0260900	1.321	0.0179047	up				HOVUSG0226500	1.23	0.0102966	up				HOVUSG0254000	-3.196	0.00594774	down
HOVUSG0269000	1.454	0.0350604	up				HOVUSG0340100	3.705	0.0156869	up				HOVUSG0340300	5.523	0.0331183	up				HOVUSG0266000	-1.028	0.0117035	down				HOVUSG0227200	-1.059	0.00467453	down				HOVUSG0258100	-1.038	0.0301375	down
HOVUSG0269100	1.734	0.0231511	up				HOVUSG0345900	-5.93	0.0159541	down				HOVUSG0344800	1.333	0.000935671	up				HOVUSG0266300	1.811	0.0353767	up				HOVUSG0230600	1.634	0.00159152	up				HOVUSG0260600	-1.29	0.000784789	down
HOVUSG0270100	-4.336	1.99179e-06	down				HOVUSG0346000	-3.4	3.49182e-08	down				HOVUSG0357700	1.043	0.0290533	up				HOVUSG0279700	1.095	0.0277691	up				HOVUSG0236000	2.797	0.000154613	up				HOVUSG0260900	-1.515	0.000533819	down
HOVUSG0271100	2.215	0.0134969	up				HOVUSG0350000	7.635	6.09102e-06	up				HOVUSG0358600	1.078	0.0147369	up				HOVUSG0284100	3.287	0.0446421	up				HOVUSG0245500	-1.226	0.00210896	down				HOVUSG0263200	-1.183	0.0143264	down
HOVUSG0273500	-1.574	1.32519e-06	down				HOVUSG0355800	-2.916	0.00555835	down				HOVUSG0363400	4.545	1.47464e-40	up				HOVUSG0287400	-2.298	0.00500447	down				HOVUSG0247600	1.376	0.0019124	up				HOVUSG0264800	1.907	2.66192e-06	up
HOVUSG0286700	-1	0.0180466	down				HOVUSG0358600	-1.35	0.000699024	down				HOVUSG0363500	3.78	3.03985e-44	up				HOVUSG0289100	-5.226	0.00107357	down				HOVUSG0263600	1.072	0.0200726	up				HOVUSG0266000	-1.255	0.000868924	down
HOVUSG0288000	1.575	0.000533469	up				HOVUSG0363200	-1.205	0.00320175	down				HOVUSG0367900	-9.592	2.24315e-12	down				HOVUSG0289900	5.543	0.00549514	up				HOVUSG0263700	2.118	0.000151592	up				HOVUSG0266400	-1.156	0.00867936	down
HOVUSG0289300	-3.407	0.00113799	down				HOVUSG0363400	2.166	1.19459e-06	up				HOVUSG0374300	-2.81	0.0247184	down				HOVUSG0290000	2.197	5.1332e-05	up				HOVUSG0264800	1.061	0.042568	up				HOVUSG0267300	-1.518	0.00154008	down
HOVUSG0290800	-1.306	0.0103412	down				HOVUSG0363500	1.767	1.32006e-08	up				HOVUSG0380900	1.003	0.0235995	up				HOVUSG0290400	-2.687	0.0259207	down				HOVUSG0266000	-1.656	8.15937e-06	down				HOVUSG0269300	2.915	0.000300387	up
HOVUSG0292200	6.239	0.00166489	up				HOVUSG0366900	3.06	0.0387529	up				HOVUSG0381200	-1.125	0.0333381	down				HOVUSG0290800	-7.07	1.6556e-05	down				HOVUSG0267400	3.482	0.0199659	up				HOVUSG0279200	6.275	0.00187787	up
HOVUSG0292500	-1.01	0.0341473	down				HOVUSG0367700	9.746	2.88906e-12	up				HOVUSG0383400	1.991	3.02661e-12	up				HOVUSG0293100	-1.096	8.13994e-12	down				HOVUSG0268400	1.577	0.0473008	up				HOVUSG0287400	2.481	3.54603e-15	up
HOVUSG0292600	6.284	0.000847146	up				HOVUSG0367900	-10.807	1.85073e-16	down				HOVUSG0386300	1.739	2.17239e-13	up				HOVUSG0299100	-1.443	8.7984e-07	down				HOVUSG0273500	-1.56	8.92616e-06	down				HOVUSG0288000	-3.586	1.32672e-11	down
HOVUSG0294900	-2.552	0.000543769	down				HOVUSG0368900	2.133	0.000362983	up				HOVUSG0391500	3.507	6.61289e-06	up				HOVUSG0301700	-4.049	0.00276511	down				HOVUSG0279200	5.935	0.00962931	up				HOVUSG0289100	-4.421	7.31772e-07	down
HOVUSG0302800	-9.165	3.03145e-11	down				HOVUSG0371100	10.455	4.60879e-15	up				HOVUSG0391900	1.045	0.00449902	up				HOVUSG0303300	-4.452	0.000565949	down				HOVUSG0279700	1.341	0.00849759	up				HOVUSG0289400	-5.993	0.0159804	down
HOVUSG0304700	-1.158	8.99721e-06	down				HOVUSG0372400	-1.045	0.0278926	down				HOVUSG0396300	2.829	0.0151313	up				HOVUSG0309600	1.201	0.00346266	up				HOVUSG0287000	1.137	0.003792	up				HOVUSG0289900	9.436	4.14638e-12	up
HOVUSG0311100	5.037	1.56076e-05	up				HOVUSG0373200	-2.006	0.00960916	down				HOVUSG0396500	-2.224	1.30143e-19	down				HOVUSG0312800	-1.929	0.000144913	down				HOVUSG0287400	1.92	0.000555179	up				HOVUSG0290400	-1.571	0.0482185	down
HOVUSG0312800	-1.895	2.65432e-06	down				HOVUSG0376500	-1.661	0.00762759	down				HOVUSG0397300	-3.324	4.58304e-12	down				HOVUSG0314100	9.151	2.42719e-11	up				HOVUSG0291100	-1.588	0.0328599	down				HOVUSG0290800	-6.901	0.000158493	down
HOVUSG0313800	-1.033	0.0260109	down				HOVUSG0380400	-4.163	5.15159e-06	down				HOVUSG0397500	-3.87	0.00115524	down				HOVUSG0317100	5.816	0.0302066	up				HOVUSG0292500	-1.88	0.00120302	down				HOVUSG0293600	1.779	0.000652175	up
HOVUSG0314100	7.989	5.90676e-08	up				HOVUSG0380900	-1.858	8.76803e-05	down				HOVUSG0398300	-2.497	7.18324e-06	down				HOVUSG0319100	-1.413	0.0082465	down				HOVUSG0292600	6.33	0.00294906	up				HOVUSG0296000	1.334	0.0411827	up
HOVUSG0318000	-1.696	0.000471943	down				HOVUSG0381700	10.041	1.31603e-13	up				HOVUSG0399500	-11.563	4.46623e-19	down				HOVUSG0319200	2.681	6.17435e-08	up				HOVUSG0293100	-1.093	0.00331328	down				HOVUSG0303300	-6.993	5.98348e-05	down
HOVUSG0326000	-1.753	2.31091e-05	down				HOVUSG0386000	-7.34	3.35127e-05	down				HOVUSG0399600	-6.146	9.92993e-63	down				HOVUSG0319700	-1.75	0.0349248	down				HOVUSG0293200	1.601	0.0375618	up				HOVUSG0309600	-1.362	0.00542719	down
HOVUSG0326800	10.102	1.23001e-12	up				HOVUSG0386300	3.956	1.60762e-30	up				HOVUSG0401200	-11.622	1.63935e-19	down				HOVUSG0322200	-5.16	0.0451443	down				HOVUSG0293600	1.656	0.0124917	up				HOVUSG0311400	4.983	0.00454783	up
HOVUSG0327000	-1.458	1.06938e-10	down				HOVUSG0386700	-4.985	0.00526045	down				HOVUSG0401800	-2.053	4.38344e-08	down				HOVUSG0326800	12.579	2.76067e-22	up				HOVUSG0296000	1.532	0.0220163	up				HOVUSG0312800	1.888	1.28824e-05	up
HOVUSG0327900	-1.464	0.000221471	down				HOVUSG0394200	-1.76	0.00318749	down				HOVUSG0402100	-1.82	7.15944e-05	down				HOVUSG0327900	4.369	0.00428613	up				HOVUSG0302100	2.774	0.000107255	up				HOVUSG0314100	8.371	3.15297e-08	up
HOVUSG0332300	1.676	0.0477868	up				HOVUSG0394800	1.238	1.77273e-06	up				HOVUSG0403500	-3.471	0.01613	down				HOVUSG0332300	5.362	0.0278291	up				HOVUSG0302500	-5.995	0.01187	down				HOVUSG0318000	3.762	2.72215e-10	up
HOVUSG0337000	2.312	0.0327746	up				HOVUSG0396000	6.036	0.0164536	up				HOVUSG0404100	-1.635	5.13921e-11	down				HOVUSG0333400	3.723	0.00207042	up				HOVUSG0302800	-9.119	2.16339e-10	down				HOVUSG0319100	-1.162	0.0359252	down
HOVUSG0337800	2.515	1.7568e-06	up				HOVUSG0397800	2.17	0.000134015	up				HOVUSG0410700	6.076	0.00858271	up				HOVUSG0334800	-3.705	4.39937e-16	down				HOVUSG0311100	6.266	1.194e-05	up				HOVUSG0319200	1.331	0.0016742	up
HOVUSG0338300	1.501	0.00017019	up				HOVUSG0397900	-4.063	5.02168e-17	down				HOVUSG0413400	10.23	1.4905e-14	up				HOVUSG0339700	-5.237	0.0441118	down				HOVUSG0314100	7.793	6.75078e-06	up				HOVUSG0319700	-3.318	7.91808e-06	down
HOVUSG0340200	1.802	0.000605293	up				HOVUSG0401800	1.136	0.0259031	up				HOVUSG0413500	10.473	7.80074e-16	up				HOVUSG0340200	1.899	0.000730117	up				HOVUSG0318000	3.863	1.27347e-09	up				HOVUSG0322400	1.05	0.000487775	up
HOVUSG0340300	1.065	0.0384535	up				HOVUSG0402700	2.201	7.32044e-05	up				HOVUSG0415500	3.553	0.00218251	up				HOVUSG0340300	6.447	0.00187247	up				HOVUSG0319100	-1.333	0.0168964	down				HOVUSG0322900	-1.117	0.0233563	down
HOVUSG0344600	-1.292	0.00557526	down				HOVUSG0403500	4.823	0.00082522	up				HOVUSG0419000	-1.02	0.0256032	down				HOVUSG0344100	-1.599	0.00187716	down				HOVUSG0322400	1.363	2.1336e-06	up				HOVUSG0326800	12.178	1.9674e-20	up
HOVUSG0344800	-1.638	0.00188408	down				HOVUSG0421500	-12.17	3.48642e-21	down				HOVUSG0419200	2.22	0.000210251	up				HOVUSG0346100	5.983	0.00904335	up				HOVUSG0322900	-2.3	4.96356e-06	down				HOVUSG0327900	-4.026	8.98426e-33	down
HOVUSG0345200	-1.703	0.000738438	down				HOVUSG0426900	-1.254	0.00780752	down				HOVUSG0419800	-1.765	0.001582	down				HOVUSG0347900	-1.204	0.0175558	down				HOVUSG0326000	-1.058	0.0208762	down				HOVUSG0334700	-2.918	1.90894e-07	down
HOVUSG0346000	-1.202	0.0110117	down				HOVUSG0430200	1.032	0.00803002	up				HOVUSG0420600	-1.093	0.00169055	down				HOVUSG0349000	-5.178	0.0416154	down				HOVUSG0326800	11.37	4.74671e-17	up				HOVUSG0334800	-4.046	5.27446e-33	down
HOVUSG0346100	1.729	0.00432721	up				HOVUSG0432000	6.477	3.24428e-06	up				HOVUSG0428700	1.246	0.0171573	up				HOVUSG0355800	5.792	0.0473339	up				HOVUSG0334700	-3.213	1.62335e-10	down				HOVUSG0338400	-2.937	0.00863812	down
HOVUSG0347100	-1.794	3.69061e-08	down				HOVUSG0433000	5.829	0.000300974	up				HOVUSG0432000	8.605	3.12615e-09	up				HOVUSG0358000	-1.282	4.4192e-07	down				HOVUSG0339600	1.55	0.0311802	up				HOVUSG0339700	-6.216	0.00299363	down
HOVUSG0363200	-1.024	1.27237e-05	down				HOVUSG0433300	-1.854	0.00315976	down				HOVUSG0433300	2.351	0.000268168	up				HOVUSG0358800	-2.035	5.48703e-06	down				HOVUSG0344500	2.683	7.9393e-08	up				HOVUSG0340200	1.835	0.000195018	up
HOVUSG0363400	1.828	7.72862e-08	up				HOVUSG0433500	2.583	4.7519e-06	up				HOVUSG0433500	3.518	4.97422e-13	up				HOVUSG0360400	1.548	0.000572935	up				HOVUSG0344600	1.611	0.00107667	up				HOVUSG0340300	-5.698	0.0034685	down
HOVUSG0363500	1.472	1.35045e-09	up				HOVUSG0434400	2.528	2.12362e-07	up				HOVUSG0434600	2.166	0.0126289	up				HOVUSG0363400	3.908	5.08171e-32	up				HOVUSG0344800	2.123	9.35569e-11	up				HOVUSG0344500	2.869	0.0436679	up
HOVUSG0367600	1.217	0.00132657	up				HOVUSG0439200	-1.748	0.0039879	down				HOVUSG0440500	6.8	0.000700016	up				HOVUSG0363500	3.335	1.63662e-39	up				HOVUSG0346000	7.564	2.02906e-05	up				HOVUSG0344800	1.454	0.0146765	up
HOVUSG0367900	-10.776	6.34013e-17	down				HOVUSG0441400	-7.001	0.000116725	down				HOVUSG0455400	-1.574	0.0235861	down				HOVUSG0364200	-2.197	3.64478e-14	down				HOVUSG0346100	-4.713	0.00194097	down				HOVUSG0346100	-3.715	0.0175692	down
HOVUSG0368000	-1.936	9.77762e-12	down				HOVUSG0441500	-2.255	0.0182689	down				HOVUSG0456200	-1.33	0.0232809	down				HOVUSG0366300	-2.607	0.0342402	down				HOVUSG0347100	2.211	3.13544e-07	up				HOVUSG0347100	1.637	0.00721435	up
HOVUSG0368800	3.613	1.36265e-08	up				HOVUSG0442000	-2.019	0.00100449	down				HOVUSG0461600	-8.548	1.61856e-09	down				HOVUSG0366800	-2.737	0.000436285	down				HOVUSG0350400	2.516	0.00420934	up				HOVUSG0350400	2.534	0.00469895	up
HOVUSG0368900	1.106	0.0173331	up				HOVUSG0449900	-1.078	0.0464159	down				HOVUSG0464600	1.753	0.000459631	up				HOVUSG0374500	-2.449	0.00731782	down				HOVUSG0356700	2.43	0.0203889	up				HOVUSG0355600	-2.788	0.0246477	down
HOVUSG0372000	-1.209	0.0041894	down				HOVUSG0452000	3.614	7.17819e-15	up				HOVUSG0465400	-9.42	3.51372e-12	down				HOVUSG0380900	1.109	0.0177136	up				HOVUSG0357200	-1.882	7.00497e-06	down				HOVUSG0357200	-1.496	0.0010751	down
HOVUSG0374500	1.091	0.00935372	up				HOVUSG0452900	-2.249	0.00063308	down				HOVUSG0465500	-3.445	0.00985454	down				HOVUSG0381700	10.093	1.73677e-14	up				HOVUSG0358800	-1.43	2.31978e-05	down				HOVUSG0363400	3.416	3.14499e-11	up
HOVUSG0376500	1.09	0.00735993	up				HOVUSG0455700	5.227	0.0118186	up				HOVUSG0467700	7.578	3.53222e-06	up				HOVUSG0382100	1.144	3.24652e-05	up				HOVUSG0363400	4.423	1.80437e-28	up				HOVUSG0363500	3.324	1.42965e-17	up
HOVUSG0376600	1.675	0.0102643	up				HOVUSG0459900	-1.277	0.000288996	down				HOVUSG0467800	-1.188	2.8315e-07	down				HOVUSG0382200	-1.013	0.000308918	down				HOVUSG0363500	4.118	6.41608e-33	up				HOVUSG0363900	-3.837	1.13428e-05	down
HOVUSG0381400	1.104	0.00221357	up				HOVUSG0461600	-8.354	2.85358e-08	down				HOVUSG0468200	-10.55	7.53171e-16	down				HOVUSG0383400	2.8	3.1091e-20	up				HOVUSG0363900	-3.289	0.000730778	down				HOVUSG0366500	1.58	0.0221126	up
HOVUSG0382600	-1.989	0.0108856	down				HOVUSG0463000	-1.387	0.00421777	down				HOVUSG0471500	1.047	0.0419733	up				HOVUSG0385600	-5.592	0.0178418	down				HOVUSG0367900	-10.283	1.93394e-14	down				HOVUSG0366800	2.511	0.000115202	up
HOVUSG0386000	-7.309	9.92757e-06	down				HOVUSG0468200	-5.875	7.793e-30	down				HOVUSG0474200	-5.741	4.76999e-08	down				HOVUSG0386000	3.388	0.0031684	up				HOVUSG0371700	-1.196	0.00805042	down				HOVUSG0371200	3.484	4.92422e-06	up
HOVUSG0386300	4.198	9.90291e-28	up				HOVUSG0474200	-1.692	1.4011e-08	down				HOVUSG0475400	-2.318	6.85371e-05	down				HOVUSG0389500	1.043	0.00348178	up				HOVUSG0372400	1.459	3.76852e-06	up				HOVUSG0372400	1.261	6.62814e-06	up
HOVUSG0386700	-6.867	3.01114e-05	down				HOVUSG0475200	7.685	7.19886e-06	up				HOVUSG0486900	-1.5	5.36903e-05	down				HOVUSG0391500	2.367	0.00483905	up				HOVUSG0377100	-1.492	0.000219963	down				HOVUSG0376500	-2.769	0.00822785	down
HOVUSG0387300	1.116	0.00147722	up				HOVUSG0490100	-11.69	1.84066e-19	down				HOVUSG0489000	1.334	0.0010775	up				HOVUSG0391900	1.062	0.000871479	up				HOVUSG0380300	3.708	0.00511182	up				HOVUSG0377100	-1.043	0.00652804	down
HOVUSG0389000	1.059	9.32849e-07	up				HOVUSG0495600	-1.205	0.00419175	down				HOVUSG0490100	-10.748	1.82868e-16	down				HOVUSG0394300	-1.277	0.0282442	down				HOVUSG0381200	2.208	0.0126347	up				HOVUSG0380300	3.659	0.00927969	up
HOVUSG0396500	-2.039	6.87762e-27	down				HOVUSG0502500	-1.508	0.018585	down				HOVUSG0494700	1.252	0.00126829	up				HOVUSG0396300	3.406	5.33931e-08	up				HOVUSG0383400	3.605	1.38779e-15	up				HOVUSG0381200	2.93	7.84637e-05	up
HOVUSG0398300	-5.272	0.00427571	down				HOVUSG0502800	-1.182	0.0132148	down				HOVUSG0495500	-8.534	1.72464e-13	down				HOVUSG0396500	-1.412	2.60504e-09	down				HOVUSG0385600	7.372	6.53096e-06	up				HOVUSG0381700	9.888	2.37706e-13	up
HOVUSG0399500	-11.818	1.01489e-13	down				HOVUSG0504700	3.717	0.0309574	up				HOVUSG0495600	-9.794	2.11293e-13	down				HOVUSG0397500	-6.414	0.000111181	down				HOVUSG0386000	-6.992	0.000125204	down				HOVUSG0382200	1.151	0.0027073	up
HOVUSG0399600	-5.872	1.47643e-41	down				HOVUSG0505000	5.71	0.0394091	up				HOVUSG0498800	3.424	0.0472613	up				HOVUSG0397600	-1.008	0.0106673	down				HOVUSG0386300	1.55	1.34366e-05	up				HOVUSG0383400	3.505	3.21878e-29	up
HOVUSG0401200	-12.768	3.86934e-24	down				HOVUSG0505700	10.063	3.18164e-14	up				HOVUSG0502800	1.622	0.0217562	up				HOVUSG0398300	-2.504	3.49359e-06	down				HOVUSG0386700	-2.582	0.000111391	down				HOVUSG0388700	-1.994	0.000690461	down
HOVUSG0401800	-1.88	0.000246604	down				HOVUSG0509200	-2.4	0.00170497	down				HOVUSG0503100	2.043	0.0135001	up				HOVUSG0399500	-10.717	1.7729e-16	down				HOVUSG0388700	-1.937	0.00757095	down				HOVUSG0391500	-2.486	0.00420887	down
HOVUSG0403600	2.408	1.27863e-08	up				HOVUSG0509700	6.363	0.00389179	up				HOVUSG0505700	8.071	1.02907e-08	up				HOVUSG0399600	-6.055	1.25567e-67	down				HOVUSG0391900	1.082	0.00157906	up				HOVUSG0391900	1.005	0.00474841	up
HOVUSG0404100	-6.37	0.00490617	down				HOVUSG0509800	3.023	0.0338937	up				HOVUSG0505900	1.205	0.0381301	up				HOVUSG0401200	-11.738	5.34316e-20	down				HOVUSG0394800	2.016	0.0154729	up				HOVUSG0393500	-4.084	0.00623184	down
HOVUSG0405400	-5.173	0.0352642	down				HOVUSG0516400	-1.043	0.0311339	down				HOVUSG0508300	3.45	0.0255149	up				HOVUSG0401800	-1.615	0.000122492	down				HOVUSG0396100	-1.337	0.0121697	down				HOVUSG0396500	-1.772	3.01183e-09	down
HOVUSG0406600	1.159	0.0116311	up				HOVUSG0517100	-1.782	9.63485e-05	down				HOVUSG0509600	1.372	0.00542392	up				HOVUSG0402100	-2.187	1.63403e-05	down				HOVUSG0396500	-2.682	9.3064e-17	down				HOVUSG0397200	-1.043	0.00431345	down
HOVUSG0413400	10.354	4.50328e-15	up				HOVUSG0520200	-1.048	6.68188e-06	down				HOVUSG0510200	-1.28	3.46814e-05	down				HOVUSG0404100	-2.154	7.29372e-08	down				HOVUSG0397900	5.919	0.00882017	up				HOVUSG0398300	-3.185	1.48023e-08	down
HOVUSG0413500	11.797	4.78273e-20	up				HOVUSG0521300	8.404	4.553e-08	up				HOVUSG0511900	1.528	2.50646e-07	up				HOVUSG0406700	-1.449	0.03645	down				HOVUSG0398300	-4.163	6.45691e-16	down				HOVUSG0399500	-10.34	1.53451e-14	down
HOVUSG0414400	-1.118	0.0251493	down				HOVUSG0521400	-1.497	0.00107313	down				HOVUSG0512300	2.216	0.0230386	up				HOVUSG0407500	1.151	1.68701e-08	up				HOVUSG0399500	-11.388	2.15828e-17	down				HOVUSG0399600	-5.817	6.52888e-51	down
HOVUSG0417000	-1.54	0.0024333	down				HOVUSG0524200	-1.638	0.004219	down				HOVUSG0513300	-1.167	0.00140457	down				HOVUSG0408200	1.213	0.00878143	up				HOVUSG0399600	-6.781	3.15277e-48	down				HOVUSG0401200	-12.324	9.35519e-22	down
HOVUSG0417900	4.379	0.0196327	up				HOVUSG0527800	-4.585	0.000612461	down				HOVUSG0516000	1.26	0.000359024	up				HOVUSG0409000	-9.349	1.555e-12	down				HOVUSG0401200	-12.411	8.87245e-22	down				HOVUSG0401700	6.417	0.000991075	up
HOVUSG0419000	-1.029	0.0111964	down				HOVUSG0527900	-5.762	0.000427135	down				HOVUSG0516400	1.092	0.00179813	up				HOVUSG0409200	7.905	2.75364e-11	up				HOVUSG0401600	2.467	0.0435583	up				HOVUSG0401800	-1.721	1.68933e-05	down
HOVUSG0419300	-1.105	0.015121	down				HOVUSG0529600	-2.739	1.50646e-06	down				HOVUSG0519600	-9.279	1.26586e-10	down				HOVUSG0410500	-1.555	0.0331383	down				HOVUSG0401800	-2.161	2.29916e-08	down				HOVUSG0402100	-2.416	1.32847e-08	down
HOVUSG0420200	2.07	2.51693e-06	up				HOVUSG0529900	-2.959	2.69687e-07	down				HOVUSG0520500	7.988	2.73163e-07	up				HOVUSG0410700	7.64	4.11181e-05	up				HOVUSG0402100	-2.903	3.39621e-09	down				HOVUSG0402700	-1.32	0.0137857	down
HOVUSG0420600	-1.083	0.00166005	down				HOVUSG0530100	1.359	0.0285999	up				HOVUSG0520600	7.424	7.66243e-06	up				HOVUSG0411000	-5.31	0.0297182	down				HOVUSG0402700	-1.89	0.00267293	down				HOVUSG0404100	-2.425	2.17716e-06	down
HOVUSG0421700	-1.299	0.000573678	down				HOVUSG0530500	2.936	2.07056e-16	up				HOVUSG0520900	2.534	0.0219837	up				HOVUSG0414300	1.544	3.13493e-05	up				HOVUSG0406600	-1.936	0.000383605	down				HOVUSG0406600	-1.751	0.00194572	down
HOVUSG0421800	-1.654	6.90691e-08	down				HOVUSG0531900	-2.162	0.000204315	down				HOVUSG0521300	6.558	0.000538476	up				HOVUSG0414400	-1.066	5.68476e-05	down				HOVUSG0407700	-2.301	0.000719393	down				HOVUSG0406700	-1.494	0.00264573	down
HOVUSG0426300	1.203	0.00710183	up				HOVUSG0532500	6.01	0.0145412	up				HOVUSG0529600	2.127	0.000858123	up				HOVUSG0415500	3.136	0.00136226	up				HOVUSG0413400	9.991	1.11435e-13	up				HOVUSG0407700	-3.182	7.72867e-08	down
HOVUSG0428700	-1.205	0.00273472	down				HOVUSG0532900	-5.641	0.0311373	down				HOVUSG0532500	4.684	0.012267	up				HOVUSG0416200	-1.36	0.00061421	down				HOVUSG0413500	10.501	1.19792e-15	up				HOVUSG0409000	-8.552	2.36682e-13	down
HOVUSG0431400	5.4	0.0345758	up				HOVUSG0534100	2.289	0.0302033	up				HOVUSG0536300	-2.291	1.75152e-07	down				HOVUSG0419100	3.667	0.0256953	up				HOVUSG0414300	3.478	6.54335e-23	up				HOVUSG0409200	9.075	1.52311e-11	up
HOVUSG0432000	5.72	5.41055e-05	up				HOVUSG0545300	8.452	1.44035e-08	up				HOVUSG0536500	-2.668	5.88524e-09	down				HOVUSG0419200	1.57	0.016864	up				HOVUSG0415600	1.154	0.0442465	up				HOVUSG0411000	-5.666	0.0196039	down
HOVUSG0433500	4.427	5.27287e-27	up				HOVUSG0565400	-12.295	9.95031e-22	down				HOVUSG0542100	-1.378	0.0473909	down				HOVUSG0419800	-2.711	4.85318e-06	down				HOVUSG0417400	1.305	7.97366e-05	up				HOVUSG0414300	4.471	3.31251e-37	up
HOVUSG0434400	1.751	0.000222716	up				HOVUSG0566500	-1.312	0.0314878	down				HOVUSG0544000	-1.83	0.000260672	down				HOVUSG0420600	-1.19	0.000190873	down				HOVUSG0419000	-1.964	3.77255e-05	down				HOVUSG0416200	-1.39	0.00145798	down
HOVUSG0434600	1.442	0.0251493	up				HOVUSG0566600	6.144	0.00248266	up				HOVUSG0545500	-1.017	0.0360444	down				HOVUSG0421700	-1.24	0.00330211	down				HOVUSG0421700	-1.031	0.00761982	down				HOVUSG0419000	-1.286	0.013798	down
HOVUSG0438300	-4.362	0.00668815	down				HOVUSG0573100	3.652	0.0161577	up				HOVUSG0548400	-1.128	0.00391815	down				HOVUSG0421800	-1.351	9.52263e-05	down				HOVUSG0426300	-1.884	2.31978e-05	down				HOVUSG0426300	-3.599	3.586e-26	down
HOVUSG0439200	-1.281	0.00867237	down				HOVUSG0579800	-1.422	4.46062e-07	down				HOVUSG0557500	1.514	0.0149928	up				HOVUSG0426300	1.908	0.00389206	up				HOVUSG0428700	2.192	0.000280147	up				HOVUSG0427600	-1.435	0.000753917	down
HOVUSG0449300	4.238	0.000805672	up				HOVUSG0581300	9.161	7.39504e-11	up				HOVUSG0562200	3.771	3.43606e-12	up				HOVUSG0432000	7.465	1.19686e-05	up				HOVUSG0429800	-1.082	0.0416738	down				HOVUSG0432000	7.909	3.34252e-07	up
HOVUSG0452000	1.203	0.0417842	up				HOVUSG0584600	3.994	0.0173034	up				HOVUSG0562300	5.166	0.0362539	up				HOVUSG0432500	-1.012	0.000687026	down				HOVUSG0432000	8.232	9.00355e-08	up				HOVUSG0433200	-1.587	0.0321896	down
HOVUSG0458700	1.302	9.32087e-06	up				HOVUSG0606400	-1.139	0.0187669	down				HOVUSG0565400	-10.913	6.03205e-17	down				HOVUSG0433500	4.168	2.84585e-25	up				HOVUSG0433300	3.084	8.35769e-11	up				HOVUSG0433500	4.04	5.66801e-22	up
HOVUSG0461600	-8.323	7.75409e-09	down				HOVUSG0607900	8.902	1.82355e-09	up				HOVUSG0566500	1.54	0.000194309	up				HOVUSG0434400	2.126	0.00252117	up				HOVUSG0433500	3.621	2.09819e-14	up				HOVUSG0434400	2.36	0.0190528	up
HOVUSG0461800	1.474	0.0205895	up				HOVUSG0613200	-1.715	0.0028375	down				HOVUSG0568400	1.309	0.00310675	up				HOVUSG0434600	3.257	0.000657692	up				HOVUSG0437800	2.109	0.0327077	up				HOVUSG0434600	-3.193	1.7315e-10	down
HOVUSG0465400	-8.972	5.36821e-11	down				HOVUSG0614700	-2.408	0.00683713	down				HOVUSG0573100	2.111	7.45846e-14	up				HOVUSG0438300	-1.626	1.50908e-17	down				HOVUSG0438200	1.343	0.000438372	up				HOVUSG0435100	3.783	4.43653e-08	up
HOVUSG0465500	-5.298	0.000376008	down				HOVUSG0616500	-2.576	0.000437347	down				HOVUSG0574000	3.623	2.97302e-06	up				HOVUSG0438700	1.154	3.55802e-10	up				HOVUSG0440000	1.863	1.03368e-05	up				HOVUSG0435200	4.674	1.215e-20	up
HOVUSG0467700	8.338	6.25518e-09	up				HOVUSG0623100	-6.924	0.000143923	down				HOVUSG0574500	1.464	9.43494e-05	up				HOVUSG0439000	1.14	5.18368e-06	up				HOVUSG0447400	1.288	0.0245689	up				HOVUSG0437800	2.298	0.0191232	up
HOVUSG0468200	-11.202	1.98629e-18	down				HOVUSG0627100	6.919	0.000968446	up				HOVUSG0576600	5.729	0.0210298	up				HOVUSG0440000	-1.093	0.0325618	down				HOVUSG0461600	-7.013	1.39772e-07	down				HOVUSG0440000	1.654	0.000178621	up
HOVUSG0472700	-5.445	0.0152426	down				HOVUSG0635100	-2.065	0.000209296	down				HOVUSG0577600	-1.005	0.000676857	down				HOVUSG0440500	7.237	0.000214803	up				HOVUSG0464600	1.223	0.00491358	up				HOVUSG0441200	-1.033	0.0141	down
HOVUSG0473200	-5.463	0.0244022	down				HOVUSG0637800	7.063	0.000147057	up				HOVUSG0581300	7.99	2.7326e-07	up				HOVUSG0441400	-5.634	0.0109612	down				HOVUSG0465400	-8.487	1.52114e-08	down				HOVUSG0441400	-5.919	0.012725	down
HOVUSG0473900	1.078	0.00133218	up				HOVUSG0637900	6.755	0.00212256	up				HOVUSG0591400	-1.131	0.000471748	down				HOVUSG0442800	1	0.0115396	up				HOVUSG0465500	-6.36	0.000224839	down				HOVUSG0442000	-2.879	7.10048e-07	down
HOVUSG0474200	-1.77	1.54252e-06	down				HOVUSG0640200	-1.396	0.0253578	down				HOVUSG0592600	-1.046	0.00885713	down				HOVUSG0448500	1.283	3.12777e-08	up				HOVUSG0467700	7.84	4.69678e-07	up				HOVUSG0451400	1.782	0.0331846	up
HOVUSG0474900	-1.095	7.58472e-05	down				HOVUSG0645100	1.742	0.0139574	up				HOVUSG0594800	6.532	6.1452e-10	up				HOVUSG0449300	4.08	0.0119797	up				HOVUSG0468200	-10.993	7.72839e-17	down				HOVUSG0452000	1.156	0.0439293	up
HOVUSG0478100	-1.358	2.32346e-07	down				HOVUSG0650300	1.394	2.38376e-05	up				HOVUSG0594900	9.655	8.39676e-13	up				HOVUSG0455400	-1.667	0.0354938	down				HOVUSG0469300	1.264	0.00627905	up				HOVUSG0455800	-1.287	0.00818338	down
HOVUSG0480900	-4.597	0.0199858	down				HOVUSG0650400	1.441	0.0435013	up				HOVUSG0606400	2.383	0.000319156	up				HOVUSG0456200	-1.972	2.47245e-05	down				HOVUSG0478800	-1.104	0.000710587	down				HOVUSG0461600	-8.788	1.68791e-09	down
HOVUSG0490100	-11.658	6.92461e-20	down				HOVUSG0653100	-1.825	1.55833e-06	down				HOVUSG0623100	-7.276	6.44908e-06	down				HOVUSG0457700	-1.061	0.0260667	down				HOVUSG0489000	1.107	0.00216133	up				HOVUSG0464600	3.369	2.90583e-24	up
HOVUSG0495500	-7.049	1.09552e-25	down				HOVUSG0656500	-10.797	2.35061e-16	down				HOVUSG0623700	-1.795	0.000431636	down				HOVUSG0460600	1.12	9.86964e-06	up				HOVUSG0490100	-10.861	5.17254e-16	down				HOVUSG0465100	-3.149	0.000228671	down
HOVUSG0495600	-10.733	1.072e-16	down				HOVUSG0656800	-10.807	4.22283e-16	down				HOVUSG0626200	-1.516	0.0365268	down				HOVUSG0461600	-8.665	6.06544e-10	down				HOVUSG0495500	-6.348	1.02636e-22	down				HOVUSG0467700	7.762	1.73001e-06	up
HOVUSG0496500	-2.239	0.00142788	down				HOVUSG0659100	-5.648	0.000279888	down				HOVUSG0635100	1.828	0.00289143	up				HOVUSG0463000	-1.394	0.00474362	down				HOVUSG0495600	-10.473	3.74619e-15	down				HOVUSG0468200	-10.905	8.30757e-17	down
HOVUSG0502500	-1.765	9.30556e-10	down				HOVUSG0660500	1.551	0.00464976	up				HOVUSG0646800	2.557	3.73835e-07	up				HOVUSG0464600	3.119	0.000291368	up				HOVUSG0496300	-3.745	0.0115302	down				HOVUSG0469800	-1.146	0.00079201	down
HOVUSG0504700	3.714	0.011934	up				HOVUSG0663800	1.234	5.13438e-05	up				HOVUSG0647500	-10.785	2.62453e-16	down				HOVUSG0465400	-1.351	0.00245438	down				HOVUSG0496500	-2.144	0.0369264	down				HOVUSG0471200	-2.876	0.0261406	down
HOVUSG0505000	6.805	6.1876e-05	up				HOVUSG0663900	1.812	1.49329e-05	up				HOVUSG0647700	-5.301	0.0413627	down				HOVUSG0467700	7.077	5.95395e-05	up				HOVUSG0504400	5.523	0.00191518	up				HOVUSG0471500	-1.153	0.000435806	down
HOVUSG0505300	1.155	1.85466e-06	up				HOVUSG0665000	-1.581	0.0320218	down				HOVUSG0648000	-10.676	8.29168e-16	down				HOVUSG0467800	-1.644	3.12331e-14	down				HOVUSG0505000	5.437	0.0371239	up				HOVUSG0474200	6.298	0.00281017	up
HOVUSG0505700	8.162	5.27523e-09	up				HOVUSG0665300	-1.433	0.0140812	down				HOVUSG0650300	2.517	1.57619e-11	up				HOVUSG0467900	-1.378	0.00648159	down				HOVUSG0505700	9.453	6.2898e-12	up				HOVUSG0490100	-10.775	6.27993e-16	down
HOVUSG0508300	1.377	0.0208041	up				HOVUSG0666000	1.38	0.0264043	up				HOVUSG0650400	2.572	0.0010784	up				HOVUSG0468200	-10.666	2.31229e-16	down				HOVUSG0509200	2.066	0.00655454	up				HOVUSG0494000	6.02	2.74711e-05	up
HOVUSG0510100	-1.792	0.00185487	down				HOVUSG0666200	-7.215	4.67885e-05	down				HOVUSG0650500	3.248	4.75847e-06	up				HOVUSG0469300	-1.183	0.000137965	down				HOVUSG0510100	-3.128	5.93978e-08	down				HOVUSG0495500	-6.444	3.65877e-21	down
HOVUSG0510200	-1.524	1.8626e-17	down				HOVUSG0667300	-10.063	1.41848e-12	down				HOVUSG0653100	1.958	1.32422e-13	up				HOVUSG0471500	1.159	0.0139295	up				HOVUSG0510200	-1.973	4.33775e-12	down				HOVUSG0495600	-10.385	4.09007e-15	down
HOVUSG0510300	-1.097	2.04811e-09	down				HOVUSG0670400	-1.58	0.0103237	down				HOVUSG0662600	-1.282	2.08746e-08	down				HOVUSG0473900	8.341	1.15834e-08	up				HOVUSG0511900	1.068	0.000348389	up				HOVUSG0496300	-3.921	0.00981116	down
HOVUSG0512300	3.54	0.00693604	up				HOVUSG0673800	2.159	0.000196511	up				HOVUSG0663800	-7.234	3.44494e-24	down				HOVUSG0481200	-1.384	0.0063401	down				HOVUSG0512300	2.143	0.0299625	up				HOVUSG0502800	-1.652	0.000626881	down
HOVUSG0514500	-1.442	0.0325818	down				HOVUSG0683900	2.665	1.05099e-05	up				HOVUSG0670600	-1.199	0.00677692	down				HOVUSG0490100	-10.865	6.26488e-17	down				HOVUSG0514300	1.64	0.00161756	up				HOVUSG0503000	-1.557	0.00485398	down
HOVUSG0517100	-3.966	1.04457e-41	down				HOVUSG0685200	-1.502	0.0288182	down				HOVUSG0670900	-1.319	0.00796641	down				HOVUSG0492500	2.775	0.0168	up				HOVUSG0514700	-1.359	0.00140572	down				HOVUSG0504500	-1.275	0.00818338	down
HOVUSG0519600	-9.794	1.40275e-13	down				HOVUSG0685300	1.979	0.0164473	up				HOVUSG0671000	-1.462	0.0241997	down				HOVUSG0494700	1.339	3.01131e-06	up				HOVUSG0517100	-1.388	0.000393743	down				HOVUSG0505000	6.171	0.00260006	up
HOVUSG0520500	5.327	0.0258626	up				HOVUSG0689100	3.721	0.00211819	up				HOVUSG0674000	1.271	0.000321737	up				HOVUSG0495500	-8.634	5.29898e-14	down				HOVUSG0519600	-8.097	2.20577e-07	down				HOVUSG0505700	10.281	7.31004e-15	up
HOVUSG0520600	6.282	0.000893709	up				HOVUSG0690600	-1.379	0.000671314	down				HOVUSG0682500	3.998	0.000287765	up				HOVUSG0495600	-9.91	6.78993e-14	down				HOVUSG0520500	7.728	1.16082e-06	up				HOVUSG0510500	-1.22	0.00121237	down
HOVUSG0521300	5.984	0.00362539	up				HOVUSG0698400	-1.127	0.0131342	down				HOVUSG0683900	1.156	0.000524154	up				HOVUSG0496500	-2.11	8.61837e-07	down				HOVUSG0520600	6.822	0.00014433	up				HOVUSG0514300	2.551	5.53739e-11	up
HOVUSG0523500	1.504	0.0406668	up				HOVUSG0709400	-1.868	0.00944236	down				HOVUSG0685300	3.18	2.21693e-14	up				HOVUSG0502800	1.856	0.00340856	up				HOVUSG0521300	6.433	0.000958827	up				HOVUSG0516000	-1.472	0.000233951	down
HOVUSG0529700	1.554	0.0109656	up				HOVUSG0719100	-1.975	0.0275828	down				HOVUSG0688300	-6.937	0.000122819	down				HOVUSG0503100	2.025	0.005681	up				HOVUSG0521400	1.918	0.00317595	up				HOVUSG0517100	-1.048	0.00311914	down
HOVUSG0530200	3.034	3.14497e-05	up				HOVUSG0722700	1.837	0.0315118	up				HOVUSG0689700	5.011	0.0318843	up				HOVUSG0504400	6.548	0.000934141	up				HOVUSG0524200	1.36	0.0415432	up				HOVUSG0517600	-1.265	5.85766e-06	down
HOVUSG0530500	1.099	0.0248722	up				HOVUSG0726700	1.082	7.91079e-06	up				HOVUSG0690000	-1.038	0.00113888	down				HOVUSG0504600	1.429	2.64524e-09	up				HOVUSG0524300	4.045	0.0141635	up				HOVUSG0519600	-8.011	2.40305e-07	down
HOVUSG0530900	1.567	0.0221968	up				HOVUSG0733800	-1.399	1.11298e-05	down				HOVUSG0690600	1.866	0.000194716	up				HOVUSG0505000	5.607	0.013841	up				HOVUSG0529600	2.533	0.000392343	up				HOVUSG0521400	2.072	0.000944216	up
HOVUSG0531900	-3.646	6.56117e-15	down				HOVUSG0746800	1.239	0.00148835	up				HOVUSG0690800	-1.026	0.000106065	down				HOVUSG0505700	9.661	2.51471e-13	up				HOVUSG0531100	1.466	0.00815872	up				HOVUSG0524300	4.344	0.00270787	up
HOVUSG0532000	-5.622	0.0127324	down				HOVUSG0751300	-1.414	0.0161951	down				HOVUSG0710800	-1.382	0.000173839	down				HOVUSG0505900	1.397	0.00724629	up				HOVUSG0532500	6.497	0.00111434	up				HOVUSG0531100	-1.227	0.0341918	down
HOVUSG0532500	5.327	0.0258626	up				HOVUSG0755900	-1.515	0.000437347	down				HOVUSG0713700	1.145	0.0330235	up				HOVUSG0506300	1.843	1.3699e-09	up				HOVUSG0534600	2.214	0.0105562	up				HOVUSG0540100	-1.084	0.00876654	down
HOVUSG0532900	-5.61	0.00849339	down				HOVUSG0757300	-4.227	1.49135e-20	down				HOVUSG0714700	-5.066	0.0158753	down				HOVUSG0506900	-1.619	0.0191851	down				HOVUSG0538800	2.024	0.0464018	up				HOVUSG0540400	1.24	0.00991988	up
HOVUSG0533800	-5.851	0.00933303	down				HOVUSG0758500	6.906	0.0029933	up				HOVUSG0714800	-4.762	2.28053e-06	down				HOVUSG0509200	2.329	0.0032901	up				HOVUSG0540100	-1.137	0.00493041	down				HOVUSG0542100	-2.879	7.77064e-14	down
HOVUSG0534100	3.035	1.68412e-06	up				HOVUSG0759300	1.724	0.00477318	up				HOVUSG0719100	1.91	0.0291486	up				HOVUSG0516000	1.195	0.00144288	up				HOVUSG0540400	1.173	0.0498544	up				HOVUSG0545500	-1.314	0.0034685	down
HOVUSG0536300	2.065	9.21178e-06	up				HOVUSG0759700	-1.148	0.01424	down				HOVUSG0725500	1.583	0.0164855	up				HOVUSG0516400	1.394	4.5056e-08	up				HOVUSG0542100	-2.831	1.34902e-05	down				HOVUSG0551600	1.324	0.00099604	up
HOVUSG0536500	1.11	5.3416e-05	up				HOVUSG0763300	4.491	0.000230069	up				HOVUSG0739500	-1.944	0.00125528	down				HOVUSG0518200	-2.991	1.18639e-05	down				HOVUSG0545500	-2.41	7.93606e-08	down				HOVUSG0555200	1.75	0.00176725	up
HOVUSG0538100	-1.025	0.0422135	down				HOVUSG0766400	4.791	1.15183e-05	up				HOVUSG0740500	-2.278	3.10597e-06	down				HOVUSG0519600	-5.523	6.15141e-11	down				HOVUSG0551600	1.111	0.0141914	up				HOVUSG0557500	2.994	4.20533e-07	up
HOVUSG0539700	1.65	9.76266e-07	up				HOVUSG0768500	1.528	1.00228e-06	up				HOVUSG0744100	1.83	0.0112355	up				HOVUSG0520900	2.363	0.0458844	up				HOVUSG0557500	2.526	9.01689e-05	up				HOVUSG0562200	-1.227	0.00528439	down
HOVUSG0541300	6.177	0.00315008	up				HOVUSG0768600	-11.53	6.3249e-19	down				HOVUSG0745500	-1.147	0.000477064	down				HOVUSG0523800	-2.192	0.0291397	down				HOVUSG0560200	-1.116	0.0355699	down				HOVUSG0562800	-1.23	0.00100485	down
HOVUSG0542100	-2.341	0.00751024	down				HOVUSG0770100	1.008	0.0040907	up				HOVUSG0746800	-1.113	0.000725115	down				HOVUSG0527900	1.559	0.0467546	up				HOVUSG0565300	-3.568	0.0210363	down				HOVUSG0565400	-11.583	3.45379e-19	down
HOVUSG0545500	1.993	6.13038e-09	up				HOVUSG0771200	-1.07	0.0465154	down				HOVUSG0751300	1.526	0.00120605	up				HOVUSG0529600	1.336	0.0368215	up				HOVUSG0565400	-11.67	3.50479e-19	down				HOVUSG0565700	-1.389	0.00357708	down
HOVUSG0553800	1.115	0.00118413	up				HOVUSG0772800	-6.593	0.000891668	down				HOVUSG0755900	1.575	7.47877e-05	up				HOVUSG0531100	1.504	0.0484961	up				HOVUSG0565700	-1.826	3.18543e-06	down				HOVUSG0567100	-1.225	0.00534673	down
HOVUSG0557800	1.381	1.78753e-08	up				HOVUSG0774300	-1.336	0.040811	down				HOVUSG0759300	-1.236	0.00841328	down				HOVUSG0534000	1.06	2.95284e-06	up				HOVUSG0567200	2.169	6.19676e-12	up				HOVUSG0567200	1.929	6.76462e-07	up
HOVUSG0558800	-2.096	9.36315e-06	down				HOVUSG0781900	-1.161	0.00526405	down				HOVUSG0759900	-1.986	0.0139034	down				HOVUSG0534600	1.905	0.0106689	up				HOVUSG0568400	1.456	3.58852e-05	up				HOVUSG0568000	1.132	0.0300294	up
HOVUSG0559000	-3.955	0.0163165	down				HOVUSG0782600	-1.337	0.00793953	down				HOVUSG0763100	1.355	0.000151648	up				HOVUSG0536300	-1.564	0.000610163	down				HOVUSG0573300	-5.12	0.00714456	down				HOVUSG0573900	-2.624	0.0200944	down
HOVUSG0559400	-2.219	3.24758e-08	down				HOVUSG0786200	-8.768	1.17934e-08	down				HOVUSG0766400	4.107	0.00535152	up				HOVUSG0544000	1.431	0.000195517	up				HOVUSG0576400	2.494	0.0360865	up				HOVUSG0576400	2.951	0.00244638	up
HOVUSG0561000	1.135	0.0129241	up				HOVUSG0797800	3.444	0.0147355	up				HOVUSG0768600	-6.671	2.97538e-14	down				HOVUSG0545500	-1.621	3.06469e-05	down				HOVUSG0579900	-3.864	0.0218802	down				HOVUSG0576600	5.361	0.0398798	up
HOVUSG0565400	-12.264	3.73719e-22	down				HOVUSG0798100	-3.865	8.32567e-23	down				HOVUSG0773800	-6.959	6.22141e-05	down				HOVUSG0548400	-2.841	1.19237e-13	down				HOVUSG0581000	1.476	0.0241961	up				HOVUSG0579900	-2.449	0.022681	down
HOVUSG0567000	1.376	6.98886e-06	up				HOVUSG0801700	-1.251	0.00163407	down				HOVUSG0778600	-1.225	0.00436408	down				HOVUSG0548700	-1.577	0.00161811	down				HOVUSG0581300	7.48	5.3739e-07	up				HOVUSG0581000	1.818	0.00152045	up
HOVUSG0568700	-1.939	0.00914662	down				HOVUSG0805400	-9.521	7.5001e-12	down				HOVUSG0780500	1.75	0.000168112	up				HOVUSG0557500	1.752	0.000497022	up				HOVUSG0584200	5.375	0.00826594	up				HOVUSG0585500	3.132	0.00363029	up
HOVUSG0573500	4.05	0.0140377	up				HOVUSG0809200	-6.281	0.00381706	down				HOVUSG0782800	1.484	0.00155144	up				HOVUSG0559000	-1.298	0.0126238	down				HOVUSG0584400	-1.3	0.0274948	down				HOVUSG0586400	-1.575	2.60587e-05	down
HOVUSG0574000	6.269	6.52168e-26	up				HOVUSG0809700	4.029	0.000994621	up				HOVUSG0786200	-6.426	0.000744868	down				HOVUSG0559400	-1	0.000617432	down				HOVUSG0584600	-1.69	3.99001e-05	down				HOVUSG0589000	3.959	0.00347096	up
HOVUSG0576600	6.983	2.34843e-05	up				HOVUSG0809800	3.061	0.000110908	up				HOVUSG0788400	2.081	0.0119291	up				HOVUSG0561900	-1.16	4.96404e-06	down				HOVUSG0586400	-1.014	0.0326318	down				HOVUSG0596700	-2.235	0.00148844	down
HOVUSG0578200	-1.383	0.000453605	down				HOVUSG0815200	8.041	2.34916e-07	up				HOVUSG0795500	-3.767	0.000244912	down				HOVUSG0562100	5.842	0.0186753	up				HOVUSG0589000	4.56	0.000640484	up				HOVUSG0601400	1.945	1.89902e-05	up
HOVUSG0581300	9.04	4.04518e-11	up				HOVUSG0817700	-1.323	0.0334426	down				HOVUSG0799600	1.237	7.67729e-07	up				HOVUSG0562200	3.866	0.0025919	up				HOVUSG0594800	5.994	1.28237e-09	up				HOVUSG0601800	2.792	0.00013051	up
HOVUSG0584200	3.466	0.00218383	up				HOVUSG0821900	2.547	2.83765e-05	up				HOVUSG0803300	3.388	9.01596e-12	up				HOVUSG0564300	1.034	8.80524e-08	up				HOVUSG0594900	9.365	1.40877e-11	up				HOVUSG0602300	-1.263	0.0011642	down
HOVUSG0588100	1.416	0.00630627	up				HOVUSG0825800	-8.023	6.7656e-07	down				HOVUSG0815200	8.458	2.00736e-08	up				HOVUSG0565100	-2.075	0.00259991	down				HOVUSG0596700	-3.538	1.48008e-11	down				HOVUSG0611700	-6.418	0.00301487	down
HOVUSG0588500	-6.996	0.000289555	down				HOVUSG0830800	2.432	0.0183697	up				HOVUSG0819500	4.349	0.00403296	up				HOVUSG0565300	5.485	0.0363351	up				HOVUSG0597400	1.352	0.0447415	up				HOVUSG0622900	-1.786	3.55961e-08	down
HOVUSG0592500	2.145	1.26635e-12	up				HOVUSG0830900	1.853	6.61973e-07	up				HOVUSG0821900	2.832	0.0171323	up				HOVUSG0565400	-11.03	2.16502e-17	down				HOVUSG0600400	1.396	0.0313703	up				HOVUSG0628800	6.285	0.00173612	up
HOVUSG0594800	6.593	7.43573e-11	up				HOVUSG0833200	2.516	1.4319e-08	up				HOVUSG0825800	-6.306	0.00108105	down				HOVUSG0565700	1.21	2.24778e-05	up				HOVUSG0601400	3.158	1.92119e-12	up				HOVUSG0633200	5.772	0.0172819	up
HOVUSG0594900	9.189	1.03856e-11	up				HOVUSG0833500	-9.334	1.73246e-11	down				HOVUSG0828000	-4.286	0.0260785	down				HOVUSG0566500	2.928	4.20565e-18	up				HOVUSG0601800	2.58	0.000399255	up				HOVUSG0650300	1.35	0.00804243	up
HOVUSG0600400	1.288	0.00252554	up				HOVUSG0834900	-1.154	0.00926386	down				HOVUSG0830300	4.158	6.40441e-05	up				HOVUSG0567600	1.011	1.11844e-05	up				HOVUSG0602300	-1.777	4.902e-08	down				HOVUSG0653100	-1.546	0.000469952	down
HOVUSG0601400	-1.538	0.00570664	down				HOVUSG0836700	-1.602	0.016162	down				HOVUSG0830600	-10.512	8.58854e-16	down				HOVUSG0572300	1.738	5.47022e-07	up				HOVUSG0611700	-6.504	0.00281513	down				HOVUSG0655900	-6.378	0.00234322	down
HOVUSG0602400	-1.46	1.1527e-08	down				HOVUSG0841300	-7.806	2.27111e-06	down				HOVUSG0830800	3.99	0.00164268	up				HOVUSG0572700	-1.903	0.000159031	down				HOVUSG0613200	-1.123	0.00157605	down				HOVUSG0656500	-11.854	2.53316e-19	down
HOVUSG0602600	1.866	0.019211	up				HOVUSG0842400	-8.589	4.12924e-09	down				HOVUSG0832000	-1.401	1.82479e-06	down				HOVUSG0574500	1.159	0.000736145	up				HOVUSG0613600	1.377	0.00152544	up				HOVUSG0656800	-10.758	3.55136e-16	down
HOVUSG0606400	-1.154	0.00205469	down				HOVUSG0842500	1.036	0.0134612	up				HOVUSG0832300	1.366	0.00168644	up				HOVUSG0577600	-1.344	0.00033606	down				HOVUSG0614700	2.683	0.00382242	up				HOVUSG0658200	5.448	0.000395069	up
HOVUSG0610900	1.082	0.0356961	up				HOVUSG0842600	6.17	0.00944236	up				HOVUSG0833500	-6.536	0.00038486	down				HOVUSG0588500	-1.509	2.65431e-06	down				HOVUSG0622900	-1.773	4.24575e-07	down				HOVUSG0659300	-6.917	0.0011506	down
HOVUSG0611000	1.406	0.00316541	up				HOVUSG0844900	-1.955	1.62521e-05	down				HOVUSG0840100	-1.299	0.00243516	down				HOVUSG0588800	-2.116	1.0214e-15	down				HOVUSG0623100	-5.157	0.00331328	down				HOVUSG0660500	2.291	2.0352e-05	up
HOVUSG0620100	-5.397	0.0178557	down				HOVUSG0845000	-10.67	8.17122e-16	down				HOVUSG0844800	-1.958	2.71848e-05	down				HOVUSG0597400	-1.031	0.00949159	down				HOVUSG0628800	5.95	0.00954303	up				HOVUSG0663900	2.14	0.00104112	up
HOVUSG0623100	-6.893	2.7201e-05	down				HOVUSG0845100	-1.291	0.00120173	down				HOVUSG0844900	-3.308	4.10702e-14	down				HOVUSG0601800	-2.879	2.60892e-11	down				HOVUSG0635100	2.129	7.52429e-05	up				HOVUSG0665300	-1.14	0.0221231	down
HOVUSG0628800	1.093	0.00834054	up				HOVUSG0845300	-2.641	4.38445e-08	down				HOVUSG0845000	-10.323	4.35141e-15	down				HOVUSG0606100	-1.328	0.00498214	down				HOVUSG0638800	-2.3	0.000172516	down				HOVUSG0667600	1.43	0.010892	up
HOVUSG0633200	1.287	0.000582717	up				HOVUSG0845400	-3.854	8.33365e-06	down				HOVUSG0845300	-1.051	0.004547	down				HOVUSG0606500	-1.07	0.00819287	down				HOVUSG0639700	2.03	0.02253	up				HOVUSG0670300	-4.454	5.57521e-05	down
HOVUSG0635100	-1.576	9.33247e-07	down				HOVUSG0845600	-1.476	2.25484e-05	down				HOVUSG0845500	2.624	0.0366387	up				HOVUSG0613400	-1.066	0.00381938	down				HOVUSG0646800	1.36	0.0473149	up				HOVUSG0670900	1.602	0.0339286	up
HOVUSG0638800	-2.643	2.12073e-11	down				HOVUSG0845700	-1.997	1.9005e-05	down				HOVUSG0846000	2.755	0.000132639	up				HOVUSG0613600	-1.321	1.30271e-06	down				HOVUSG0647500	-9.038	5.78025e-10	down				HOVUSG0671100	1.144	0.0116049	up
HOVUSG0639600	3.298	2.5976e-05	up				HOVUSG0845800	-1.824	9.02553e-07	down				HOVUSG0848200	1.297	9.74217e-06	up				HOVUSG0616500	-2.554	0.0226714	down				HOVUSG0648000	-9.939	6.12979e-13	down				HOVUSG0672100	2.302	2.07856e-06	up
HOVUSG0640700	1.207	4.60702e-05	up				HOVUSG0846000	-1.91	0.000716029	down				HOVUSG0858300	2.596	1.00567e-07	up				HOVUSG0620300	1.466	0.000134342	up				HOVUSG0648300	1.049	0.0109863	up				HOVUSG0672400	1.669	0.0286723	up
HOVUSG0642000	-1.479	0.00526407	down				HOVUSG0846100	-2.111	4.61686e-05	down				HOVUSG0859700	1.438	0.00012826	up				HOVUSG0623700	-1.991	0.00144292	down				HOVUSG0650300	1.637	0.000368141	up				HOVUSG0674700	1.589	0.0409145	up
HOVUSG0644300	-1.315	0.0383268	down				HOVUSG0859700	-1.235	0.0117416	down				HOVUSG0860100	-1.617	4.47319e-08	down				HOVUSG0626200	-2.695	0.00104648	down				HOVUSG0656200	1.131	0.0198003	up				HOVUSG0677000	1.704	0.0453443	up
HOVUSG0647500	-10.696	1.44096e-15	down				HOVUSG0884700	8.486	9.52108e-09	up				HOVUSG0862500	-10.737	1.7132e-16	down				HOVUSG0628500	1.02	2.514e-06	up				HOVUSG0660500	2.154	4.27797e-05	up				HOVUSG0684200	2.39	0.00538458	up
HOVUSG0647700	-5.749	0.00751899	down				HOVUSG0890400	1.261	0.00218553	up				HOVUSG0870900	-1.04	0.00233914	down				HOVUSG0632300	-1.774	8.64708e-05	down				HOVUSG0663800	-9.335	8.12152e-16	down				HOVUSG0685600	2.529	5.80742e-07	up
HOVUSG0648000	-10.788	5.26388e-17	down				HOVUSG0891300	-5.69	0.0394846	down				HOVUSG0878600	-1.152	0.0393095	down				HOVUSG0634600	-1.555	0.01687	down				HOVUSG0667300	8.096	7.69012e-06	up				HOVUSG0688500	-2.567	0.000530769	down
HOVUSG0650300	1.44	1.45928e-07	up				HOVUSG0903300	-3.396	0.0302033	down				HOVUSG0883900	1.778	0.0124486	up				HOVUSG0635100	1.257	0.0499597	up				HOVUSG0667600	2.434	2.48891e-07	up				HOVUSG0689100	2.249	0.000627838	up
HOVUSG0650500	1.534	0.000354709	up				HOVUSG0905000	-7.382	2.16265e-05	down				HOVUSG0884700	8.96	5.16689e-10	up				HOVUSG0638800	1.557	0.00120881	up				HOVUSG0670300	-8.304	2.02288e-07	down				HOVUSG0690000	2.771	1.61287e-07	up
HOVUSG0651300	2.305	0.0176601	up				HOVUSG0917200	-1.305	0.00487279	down				HOVUSG0897000	-1.106	0.00256719	down				HOVUSG0645100	-1.442	0.00105625	down				HOVUSG0670600	1.393	0.00223041	up				HOVUSG0691100	-1.106	0.0487671	down
HOVUSG0663800	-11.262	1.85434e-18	down				HOVUSG0921000	1.622	0.00228909	up				HOVUSG0898100	6.553	1.98263e-05	up				HOVUSG0650300	2.774	5.96411e-15	up				HOVUSG0670900	2.4	4.79856e-05	up				HOVUSG0697100	-1.581	0.0483565	down
HOVUSG0666100	-1.869	0.0230782	down				HOVUSG0937400	-1.793	0.00291965	down				HOVUSG0908100	-1.251	0.00113254	down				HOVUSG0650400	2.809	3.24105e-05	up				HOVUSG0671100	1.076	0.0383144	up				HOVUSG0703000	5.261	6.83526e-06	up
HOVUSG0666200	-7.185	1.1574e-05	down				HOVUSG0941500	1.412	0.0406733	up				HOVUSG0909500	2.786	7.6982e-10	up				HOVUSG0650500	3.36	3.28793e-07	up				HOVUSG0685600	2.112	2.94506e-05	up				HOVUSG0708700	2.671	0.000353231	up
HOVUSG0667300	3.199	5.53516e-11	up				HOVUSG0946500	-2.07	0.00382321	down				HOVUSG0909900	2.608	0.0036209	up				HOVUSG0653100	1.345	1.12792e-05	up				HOVUSG0688300	-6.679	0.00122134	down				HOVUSG0710800	-1.336	3.43561e-05	down
HOVUSG0667900	6.527	0.001001	up				HOVUSG0946600	-3.971	4.19165e-07	down				HOVUSG0914000	-1.035	0.00234165	down				HOVUSG0656500	-11.205	3.18758e-18	down				HOVUSG0688400	-3.334	0.00644893	down				HOVUSG0711100	4.719	0.01164	up
HOVUSG0668200	2.84	0.0239053	up				HOVUSG0947400	-2.145	0.00863418	down				HOVUSG0920000	2.405	0.0152665	up				HOVUSG0656800	-10.111	2.05959e-14	down				HOVUSG0688500	-2.434	0.000511014	down				HOVUSG0712400	2.42	0.00656204	up
HOVUSG0670300	-5.186	0.032396	down				HOVUSG0950800	10.771	3.91786e-16	up				HOVUSG0937400	1.265	0.000246966	up				HOVUSG0662600	-1.519	6.31605e-10	down				HOVUSG0689700	5.459	0.0441284	up				HOVUSG0714600	2.747	7.80599e-15	up
HOVUSG0670400	-1.237	0.00131645	down				HOVUSG0950900	7.54	5.76792e-06	up				HOVUSG0937500	1.002	0.000303557	up				HOVUSG0662900	-1.391	4.39937e-16	down				HOVUSG0690000	3.094	2.55535e-13	up				HOVUSG0720400	-1.78	9.53878e-05	down
HOVUSG0670600	1.275	0.0210658	up				HOVUSG0951300	-1.822	0.001629	down				HOVUSG0942700	1.198	0.0432782	up				HOVUSG0663900	3.288	2.59278e-06	up				HOVUSG0691100	-1.644	0.000571438	down				HOVUSG0722000	6.091	0.00391603	up
HOVUSG0673800	-3.245	0.0258974	down				HOVUSG0952000	5.76	0.0457439	up				HOVUSG0944400	-1.042	0.00143259	down				HOVUSG0665000	-3.814	0.000712236	down				HOVUSG0708700	2.031	0.0167476	up				HOVUSG0723400	1.959	0.000332233	up
HOVUSG0680400	-1.311	0.0299218	down				HOVUSG0952700	1.945	0.000263748	up				HOVUSG0945500	-1.307	1.34651e-06	down				HOVUSG0670600	-2.433	1.98505e-10	down				HOVUSG0709900	1.095	0.0381153	up				HOVUSG0730000	-1.896	0.0493487	down
HOVUSG0682400	-1.21	0.00247286	down				HOVUSG0953700	1.608	5.07896e-05	up				HOVUSG0948100	-1.68	0.00349641	down				HOVUSG0670900	-1.342	0.00322858	down				HOVUSG0710800	-1.201	0.00067682	down				HOVUSG0735000	-3.386	0.0412923	down
HOVUSG0682900	1.82	0.00674671	up				HOVUSG0956400	-1.161	0.0428417	down				HOVUSG0950400	5.908	0.0100603	up				HOVUSG0671000	-1.247	0.0400816	down				HOVUSG0714600	1.697	0.000195282	up				HOVUSG0735200	1.355	0.00145096	up
HOVUSG0688000	1.694	0.0398094	up				HOVUSG0960500	-1.595	0.00148511	down				HOVUSG0951100	-1.248	0.000234098	down				HOVUSG0674000	1.325	4.37879e-05	up				HOVUSG0714800	3.741	0.0327286	up				HOVUSG0738600	1.433	9.71522e-05	up
HOVUSG0688300	-6.611	0.00276705	down				HOVUSG0961900	-2.001	0.000279888	down				HOVUSG0951300	1.93	6.03346e-05	up				HOVUSG0676600	-1.159	1.24426e-05	down				HOVUSG0717900	1.775	0.0391529	up				HOVUSG0745500	1.619	0.0205791	up
HOVUSG0689700	5.876	0.00462909	up				HOVUSG0962500	-1.338	0.0175078	down				HOVUSG0955600	7.028	2.84155e-08	up				HOVUSG0680400	-1.119	0.0440679	down				HOVUSG0735200	1.506	4.20637e-07	up				HOVUSG0746800	1.209	0.0473956	up
HOVUSG0694700	1.218	1.02971e-05	up				HOVUSG0964600	-1.044	0.0133294	down				HOVUSG0955700	5.537	0.0309424	up				HOVUSG0681400	-1.183	0.0179296	down				HOVUSG0737600	1.952	4.4473e-06	up				HOVUSG0748400	-1.682	0.000180797	down
HOVUSG0703000	-5.404	0.0172221	down				HOVUSG0964800	-2.546	6.65859e-05	down				HOVUSG0957100	3.775	0.000267233	up				HOVUSG0682500	3.762	0.000699016	up				HOVUSG0738600	1.315	0.00503118	up				HOVUSG0751300	2.896	8.20436e-07	up
HOVUSG0704100	-1.239	1.98056e-05	down				HOVUSG0965100	-1.797	0.00145721	down				HOVUSG0957200	4.854	1.32494e-05	up				HOVUSG0685300	2.172	5.56135e-09	up				HOVUSG0740500	-1.292	0.0100558	down				HOVUSG0751500	1.593	0.000150774	up
HOVUSG0705300	1.076	0.00280086	up				HOVUSG0969700	-1.63	2.12932e-05	down				HOVUSG0959100	1.223	0.0310041	up				HOVUSG0688300	-7.057	7.03879e-05	down				HOVUSG0745500	1.467	0.0264343	up				HOVUSG0754900	1.044	0.000150774	up
HOVUSG0708700	1.727	5.41947e-05	up				HOVUSG0977200	-3.071	0.0389315	down				HOVUSG0960500	1.267	1.5453e-06	up				HOVUSG0688400	-2.647	0.0119654	down				HOVUSG0748000	2.677	0.0273951	up				HOVUSG0757100	2.665	2.7474e-05	up
HOVUSG0709300	-1.032	0.00331393	down				HOVUSG0985800	-1.708	0.00829206	down				HOVUSG0961300	1.038	0.0398734	up				HOVUSG0688500	-1.563	0.0016351	down				HOVUSG0748400	-1.617	4.80168e-05	down				HOVUSG0758000	3.32	0.00590196	up
HOVUSG0710500	-1.808	0.0105582	down				HOVUSG0989200	-2.101	0.0145282	down				HOVUSG0961600	-1.017	0.000667471	down				HOVUSG0689700	5.25	0.00714977	up				HOVUSG0751300	3.555	3.19221e-10	up				HOVUSG0758600	2.209	0.0257173	up
HOVUSG0713200	2.912	0.00663768	up				HOVUSG0996900	8.664	2.34187e-09	up				HOVUSG0963000	-1.388	6.22141e-05	down				HOVUSG0690000	-1.198	0.00533444	down				HOVUSG0751500	1.88	1.30396e-05	up				HOVUSG0760800	-4.543	0.00682971	down
HOVUSG0717800	3.338	0.0416062	up				HOVUSG0998500	-3.061	0.0122685	down				HOVUSG0963300	-1.151	0.0256662	down				HOVUSG0690600	1.34	0.0117017	up				HOVUSG0766400	4.024	0.0195348	up				HOVUSG0762200	-1.014	0.00285724	down
HOVUSG0719600	-1.42	3.03938e-05	down				HOVUSG0999300	-1.369	0.00996397	down				HOVUSG0967100	1.594	0.000477578	up				HOVUSG0691600	-2.642	0.0457965	down				HOVUSG0768600	-10.354	1.37561e-14	down				HOVUSG0762500	-2.694	4.0607e-05	down
HOVUSG0720400	-3.168	0.00246919	down				HOVUSG1001900	1.544	0.000525346	up				HOVUSG0967300	-2.481	2.44828e-07	down				HOVUSG0702100	-1.163	0.0179296	down				HOVUSG0768800	2.087	0.000333363	up				HOVUSG0763700	2.907	3.64359e-06	up
HOVUSG0721200	1.218	1.35266e-06	up				HOVUSG1011300	-2.715	0.0302033	down				HOVUSG0968700	-1.295	8.05788e-05	down				HOVUSG0704200	-1.039	0.00599646	down				HOVUSG0771100	-1.023	0.00391072	down				HOVUSG0764100	-10.736	2.68823e-16	down
HOVUSG0730000	-2.227	0.000241327	down				HOVUSG1020200	3.695	0.00145332	up				HOVUSG0969400	-1.397	0.0333899	down				HOVUSG0709300	1.475	0.01085	up				HOVUSG0771800	2.493	0.00567786	up				HOVUSG0764200	-4.604	0.000320979	down
HOVUSG0734700	1.081	2.37088e-06	up				HOVUSG1032400	6.338	0.00659939	up				HOVUSG0977700	-1.366	5.46841e-06	down				HOVUSG0710500	-1.379	0.0170582	down				HOVUSG0772200	-1.265	0.000542148	down				HOVUSG0766400	5.07	7.62689e-05	up
HOVUSG0735400	3.698	5.27148e-08	up				HOVUSG1033700	-1.258	0.000269912	down				HOVUSG0989400	-1.319	0.0276201	down				HOVUSG0710800	-1.188	0.00671894	down				HOVUSG0773800	-6.335	0.00278884	down				HOVUSG0768500	-3.517	3.114e-09	down
HOVUSG0746700	-6.256	0.0010668	down				HOVUSG1034300	7.454	1.99139e-21	up				HOVUSG0998500	2.369	1.87041e-07	up				HOVUSG0711100	11.678	6.24137e-20	up				HOVUSG0774300	1.184	1.77425e-05	up				HOVUSG0768600	-10.266	1.53451e-14	down
HOVUSG0749900	-2.421	1.88004e-07	down				HOVUSG1035600	-1.967	0.0111763	down				HOVUSG0999300	1.44	0.0477282	up				HOVUSG0712100	1.343	3.154e-10	up				HOVUSG0778600	-1.056	0.0250338	down				HOVUSG0768800	1.791	0.00352439	up
HOVUSG0751300	-1.96	0.00136029	down				HOVUSG1035800	-2.514	0.0122923	down				HOVUSG1000000	1.28	0.000771834	up				HOVUSG0712300	5.755	0.0134037	up				HOVUSG0780100	-3.593	0.0151587	down				HOVUSG0772200	-1.218	0.000175588	down
HOVUSG0751500	-1.203	6.00713e-05	down				HOVUSG1039600	-1.58	0.0203855	down				HOVUSG1001700	1.568	0.000847018	up				HOVUSG0712400	2.219	0.000111969	up				HOVUSG0780500	4.283	2.83536e-19	up				HOVUSG0774300	1.649	0.00106252	up
HOVUSG0755900	-1.136	0.000567353	down				HOVUSG1040400	6.872	3.57007e-56	up				HOVUSG1001900	-1.259	0.0187049	down				HOVUSG0713700	1.107	0.00332322	up				HOVUSG0781400	-5.13	0.00340113	down				HOVUSG0780500	3.759	3.55871e-23	up
HOVUSG0758000	1.396	7.89523e-06	up				HOVUSG1040500	-1.746	9.14986e-05	down				HOVUSG1013000	-1.419	0.023237	down				HOVUSG0722000	6.716	0.000154883	up				HOVUSG0782600	2.024	9.43235e-06	up				HOVUSG0782600	2.237	6.36238e-08	up
HOVUSG0759700	-2.31	8.07505e-20	down				HOVUSG1042400	-2.549	0.0045933	down				HOVUSG1013900	6.303	0.00184067	up				HOVUSG0723400	1.17	0.000216773	up				HOVUSG0786200	-7.178	4.03226e-05	down				HOVUSG0782800	-1.396	0.0161349	down
HOVUSG0760000	-2.605	2.44563e-10	down				HOVUSG1042900	6.184	0.0103391	up				HOVUSG1017000	-1.253	0.00335017	down				HOVUSG0724700	-1.376	1.13631e-06	down				HOVUSG0786800	-1.642	2.55068e-05	down				HOVUSG0786200	-7.09	4.11129e-05	down
HOVUSG0765900	1.875	0.000360294	up				HOVUSG1044000	1.132	0.00533246	up				HOVUSG1018000	3.007	5.51656e-07	up				HOVUSG0735100	1.355	0.0336287	up				HOVUSG0788400	3.242	0.00018391	up				HOVUSG0786800	-1.481	0.00064265	down
HOVUSG0766400	3.19	0.00840092	up				HOVUSG1044700	-8.467	1.74378e-08	down				HOVUSG1021600	2.049	3.10388e-06	up				HOVUSG0736100	-1.262	0.00238497	down				HOVUSG0790200	4.504	5.25916e-09	up				HOVUSG0790200	3.302	0.0002803	up
HOVUSG0768500	1.928	1.61482e-13	up				HOVUSG1044800	-5.955	0.0150908	down				HOVUSG1023700	3.187	0.0408769	up				HOVUSG0740500	-2.07	9.10848e-07	down				HOVUSG0792400	1.407	0.0393355	up				HOVUSG0792400	1.316	0.0371316	up
HOVUSG0768600	-11.499	2.34607e-19	down				HOVUSG1046300	-2.119	5.11936e-05	down				HOVUSG1025100	1.542	0.00747577	up				HOVUSG0744100	1.968	0.0497544	up				HOVUSG0794100	1.766	0.0223187	up				HOVUSG0794100	3.772	5.2836e-17	up
HOVUSG0768800	1.225	1.94953e-06	up				HOVUSG1046700	-4.526	0.00572043	down				HOVUSG1026900	-1.097	0.00938931	down				HOVUSG0744200	-1.454	2.30312e-08	down				HOVUSG0794300	1.021	0.00773494	up				HOVUSG0794500	1.857	0.0203015	up
HOVUSG0773500	1.217	8.20159e-05	up				HOVUSG1047900	8.704	2.33089e-09	up				HOVUSG1034900	2.375	7.90172e-05	up				HOVUSG0745500	-1.564	0.000204523	down				HOVUSG0794500	2.559	0.000194255	up				HOVUSG0795500	-7.369	9.37597e-09	down
HOVUSG0773800	-7.123	0.000293464	down				HOVUSG1049600	1.571	0.0283812	up				HOVUSG1035100	1.642	0.0185759	up				HOVUSG0748400	-1.537	0.000380994	down				HOVUSG0795500	-6.399	6.48348e-11	down				HOVUSG0800200	-1.932	1.88618e-07	down
HOVUSG0774300	-1.099	0.00589684	down				HOVUSG1053300	5.587	0.047641	up				HOVUSG1035600	1.527	0.00917094	up				HOVUSG0751300	1.114	0.0148767	up				HOVUSG0800200	-1.34	0.00821517	down				HOVUSG0809100	9.963	1.31784e-13	up
HOVUSG0781900	-1.147	9.31642e-06	down				HOVUSG1054200	-1.364	2.39525e-06	down				HOVUSG1037300	-1.03	0.0418267	down				HOVUSG0754000	1.101	1.46543e-06	up				HOVUSG0803300	2.257	1.47024e-05	up				HOVUSG0809200	2.869	6.42165e-12	up
HOVUSG0782600	-1.404	1.0647e-07	down				HOVUSG1055800	1.237	0.000536257	up				HOVUSG1038800	2.817	0.0187049	up				HOVUSG0754900	1.254	3.6075e-10	up				HOVUSG0807300	-1.781	0.0452753	down				HOVUSG0811300	2.182	1.31486e-05	up
HOVUSG0786100	-2.121	0.0389407	down				HOVUSG1055900	2.313	3.82508e-05	up				HOVUSG1039600	1.598	0.000585887	up				HOVUSG0756800	-1.035	0.0131172	down				HOVUSG0809200	-7.23	3.0494e-05	down				HOVUSG0811400	2.337	1.89838e-12	up
HOVUSG0786200	-8.735	6.41161e-09	down				HOVUSG1059600	1.19	0.0200567	up				HOVUSG1043800	-1.376	9.50449e-06	down				HOVUSG0758000	3.495	2.15583e-06	up				HOVUSG0815200	8.639	5.53743e-09	up				HOVUSG0815200	8.91	1.38814e-09	up
HOVUSG0788500	-5.389	0.0207347	down				HOVUSG1069700	-1.114	0.0339846	down				HOVUSG1045700	-1.271	0.000518977	down				HOVUSG0759300	-1.03	0.00294936	down				HOVUSG0816700	2.895	0.00288723	up				HOVUSG0817600	1.63	1.97442e-07	up
HOVUSG0790200	-2.307	5.19205e-08	down				HOVUSG1070000	8.916	6.32989e-10	up				HOVUSG1047500	-6.152	0.00521489	down				HOVUSG0759600	-1.092	0.0347923	down				HOVUSG0817600	1.873	4.55101e-05	up				HOVUSG0817900	4.505	0.0206105	up
HOVUSG0793600	1.457	0.0450074	up				HOVUSG1071300	10.038	6.10799e-12	up				HOVUSG1047800	-5.374	0.0487751	down				HOVUSG0759900	-2.48	0.00100072	down				HOVUSG0821500	1.517	0.000634735	up				HOVUSG0821500	1.808	7.00437e-07	up
HOVUSG0796600	-2.949	0.00328904	down				HOVUSG1074300	-1.298	0.043313	down				HOVUSG1050200	-4.865	0.021872	down				HOVUSG0763700	2.804	2.4386e-07	up				HOVUSG0821700	-1.263	0.0344976	down				HOVUSG0821900	2.883	0.00556462	up
HOVUSG0800200	1.345	9.59128e-07	up				HOVUSG1075700	-2.171	0.00233193	down				HOVUSG1053700	-6.594	0.000418299	down				HOVUSG0764100	-10.489	6.9155e-16	down				HOVUSG0821900	2.468	0.0452326	up				HOVUSG0822100	4.993	0.0486564	up
HOVUSG0801700	-1.235	1.57259e-07	down				HOVUSG1077800	-1.325	0.0103289	down				HOVUSG1053800	-6.823	0.000108138	down				HOVUSG0764300	-1.177	1.81316e-09	down				HOVUSG0825800	-5.633	0.0405535	down				HOVUSG0825400	1.26	8.86814e-06	up
HOVUSG0803300	2.236	2.88787e-06	up				HOVUSG1102800	1.169	0.000106465	up				HOVUSG1054000	-1.449	4.41557e-10	down				HOVUSG0764400	-1.344	0.00227335	down				HOVUSG0826800	4.142	0.000566371	up				HOVUSG0826800	4.274	0.000555217	up
HOVUSG0803900	1.02	8.68693e-06	up				HOVUSG1104800	-1.83	0.0130443	down				HOVUSG1054200	-2.748	7.6011e-31	down				HOVUSG0765900	2.471	0.0120249	up				HOVUSG0830100	-1.018	0.0020182	down				HOVUSG0830300	-2.28	0.0128397	down
HOVUSG0809200	-6.251	0.000893128	down				HOVUSG1105900	1.067	0.000109301	up				HOVUSG1070400	1.478	0.0308105	up				HOVUSG0766400	3.681	0.0191096	up				HOVUSG0830600	-10.65	1.56212e-15	down				HOVUSG0831600	2.125	0.0263423	up
HOVUSG0811800	-2.258	0.00764762	down				HOVUSG1109500	-7.995	1.50646e-06	down				HOVUSG1073300	1.31	0.000615985	up				HOVUSG0768600	-7.775	4.2955e-11	down				HOVUSG0830800	5.12	0.0161525	up				HOVUSG0834500	-1.679	0.000723243	down
HOVUSG0812300	-5.779	0.00662758	down				HOVUSG1110500	1.526	0.037713	up				HOVUSG1076500	-1.044	0.00126276	down				HOVUSG0770900	-1.464	0.000389012	down				HOVUSG0836600	-1.199	0.0065713	down				HOVUSG0836600	-1.547	0.000437998	down
HOVUSG0815200	8.351	1.55617e-08	up				HOVUSG1112900	-2.692	5.85731e-07	down				HOVUSG1078000	-1.163	9.80165e-07	down				HOVUSG0773800	-2.459	0.0477658	down				HOVUSG0843000	4.39	0.00108697	up				HOVUSG0840500	-1.23	0.00423046	down
HOVUSG0817600	-1.329	6.16184e-05	down				HOVUSG1113200	-9.997	8.97829e-14	down				HOVUSG1083200	-1.92	0.0134837	down				HOVUSG0774300	-1.383	0.0113743	down				HOVUSG0844900	-3.553	8.96303e-13	down				HOVUSG0841100	-8.611	2.20058e-09	down
HOVUSG0821000	-1.068	0.0376662	down				HOVUSG1116600	2.63	1.30126e-09	up				HOVUSG1087300	-1.039	0.00361125	down				HOVUSG0780500	2.07	1.25929e-06	up				HOVUSG0845000	-11.534	1.89958e-18	down				HOVUSG0841300	-6.815	2.28346e-07	down
HOVUSG0821500	1.772	3.21095e-15	up				HOVUSG1122100	-1.468	0.040069	down				HOVUSG1094300	-2.478	0.000717221	down				HOVUSG0782200	-3.356	0.00597518	down				HOVUSG0845700	3.105	2.54343e-10	up				HOVUSG0841800	-1.144	9.02244e-05	down
HOVUSG0821900	1.927	0.000791602	up				HOVUSG1124600	2.404	0.0448674	up				HOVUSG1105900	1.464	0.0232794	up				HOVUSG0782800	1.134	0.0243534	up				HOVUSG0846000	3.279	2.2941e-06	up				HOVUSG0841900	-1.558	8.91982e-05	down
HOVUSG0822500	-2.065	4.34394e-06	down				HOVUSG1128900	3.969	8.84196e-05	up				HOVUSG1106200	-2.304	1.04635e-07	down				HOVUSG0786200	-6.54	0.000339482	down				HOVUSG0846100	2.575	7.88613e-07	up				HOVUSG0842400	-5.121	7.09369e-14	down
HOVUSG0823300	5.3	0.0321624	up				HOVUSG1137000	-1.596	1.45974e-05	down				HOVUSG1106400	-1.502	7.96913e-06	down				HOVUSG0786800	-1.042	0.000431511	down				HOVUSG0848200	1.636	0.0133102	up				HOVUSG0843000	7.684	4.55373e-28	up
HOVUSG0825800	-7.993	2.40319e-07	down				HOVUSG1140900	6.361	0.00669653	up				HOVUSG1107300	1.195	0.0241212	up				HOVUSG0787000	-1.106	4.94908e-06	down				HOVUSG0859600	-1.946	0.00163341	down				HOVUSG0845100	-2.488	3.73072e-06	down
HOVUSG0830600	-10.791	2.18182e-16	down				HOVUSG1141500	-1.077	0.00562902	down				HOVUSG1109300	-2.66	0.00241939	down				HOVUSG0788000	-1.021	0.0241249	down				HOVUSG0859700	1.271	0.00448259	up				HOVUSG0845600	1.215	0.0383769	up
HOVUSG0831000	-5.423	0.0201911	down				HOVUSG1147500	-7.968	2.18779e-07	down				HOVUSG1113200	-5.72	0.00176289	down				HOVUSG0788700	-1.656	2.37364e-05	down				HOVUSG0862300	1.994	0.0211015	up				HOVUSG0845700	2.517	1.52428e-06	up
HOVUSG0833200	3.054	6.19489e-15	up				HOVUSG1148300	-1.336	0.00219569	down				HOVUSG1114800	2.158	0.00682766	up				HOVUSG0795500	-4.128	0.000790389	down				HOVUSG0862400	1.945	0.01844	up				HOVUSG0846300	3.091	0.0447911	up
HOVUSG0833500	-9.303	5.06623e-12	down				HOVUSG1152200	-1.279	1.36681e-05	down				HOVUSG1120200	-1.749	4.34993e-12	down				HOVUSG0796900	5.427	0.0490301	up				HOVUSG0862500	-8.666	8.16023e-25	down				HOVUSG0847500	1.656	1.34573e-05	up
HOVUSG0836300	2.75	2.24488e-06	up				HOVUSG1154300	-8.107	2.11501e-07	down				HOVUSG1120600	-3.328	4.32623e-06	down				HOVUSG0797700	5.925	0.00492872	up				HOVUSG0866400	2.506	0.0124613	up				HOVUSG0858700	2.226	1.10562e-12	up
HOVUSG0843700	1.003	4.49136e-05	up				HOVUSG1164800	6.354	0.00317066	up				HOVUSG1121600	1.828	3.24989e-08	up				HOVUSG0798100	1.351	5.18704e-06	up				HOVUSG0866700	1.378	0.00188051	up				HOVUSG0860000	-2.19	0.0105744	down
HOVUSG0844200	1.548	0.0133942	up				HOVUSG1169000	-1.313	0.0450822	down				HOVUSG1121800	2.68	7.13494e-05	up				HOVUSG0809100	10.612	3.28953e-16	up				HOVUSG0867300	2.07	0.0173829	up				HOVUSG0860700	1.128	0.00095473	up
HOVUSG0844900	-1.427	0.000157726	down				HOVUSG1175600	-1.139	0.00964873	down				HOVUSG1125800	1.321	0.0261293	up				HOVUSG0809200	4.532	2.17496e-16	up				HOVUSG0868100	1.364	0.0391002	up				HOVUSG0862400	1.839	0.0303453	up
HOVUSG0845000	-10.639	3.31206e-16	down				HOVUSG1182300	-1.515	0.0339392	down				HOVUSG1127400	1.379	0.0344724	up				HOVUSG0811300	2.029	4.07504e-08	up				HOVUSG0870100	-1.456	0.00118959	down				HOVUSG0866400	2.562	0.00836752	up
HOVUSG0845300	-2.342	5.99693e-17	down				HOVUSG1182400	1.195	0.00125927	up				HOVUSG1128500	-1.014	0.0288066	down				HOVUSG0811400	1.952	1.41907e-16	up				HOVUSG0873900	1.466	0.0225289	up				HOVUSG0868100	1.587	0.00759444	up
HOVUSG0845400	-3.069	0.00596584	down				HOVUSG1184900	1.507	0.0310636	up				HOVUSG1130200	-5.405	4.01934e-07	down				HOVUSG0812300	-2.77	0.000592142	down				HOVUSG0880400	-1.402	0.0195791	down				HOVUSG0878600	1.039	0.0250711	up
HOVUSG0845600	-1.718	1.36575e-08	down				HOVUSG1190300	-2.15	0.0303715	down				HOVUSG1133800	-1.672	0.000651976	down				HOVUSG0815200	8.996	6.87219e-11	up				HOVUSG0883900	1.685	0.00672018	up				HOVUSG0884700	8.427	5.00593e-09	up
HOVUSG0845700	-1.927	4.19251e-06	down				HOVUSG1200500	-3.951	0.00928737	down				HOVUSG1142200	-1.092	0.0152722	down				HOVUSG0816600	-1.453	0.00606886	down				HOVUSG0884000	4.668	0.0129561	up				HOVUSG0886400	-1.831	5.18825e-09	down
HOVUSG0845800	-1.118	0.0144726	down				HOVUSG1207800	6.368	0.00389179	up				HOVUSG1142800	-1.659	0.0170514	down				HOVUSG0816700	-1.257	0.0319503	down				HOVUSG0884700	9.088	8.30354e-11	up				HOVUSG0888800	1.239	0.0258812	up
HOVUSG0846000	-1.313	0.00420251	down				HOVUSG1207900	6.235	0.0180255	up				HOVUSG1146800	1.625	0.048074	up				HOVUSG0817100	-1.087	0.0147547	down				HOVUSG0890800	-2.045	0.00704485	down				HOVUSG0903300	2.236	0.0044424	up
HOVUSG0846100	-1.552	0.000396938	down				HOVUSG1208000	3.162	2.38404e-05	up				HOVUSG1150600	-1.842	0.000174776	down				HOVUSG0817700	1.129	0.00117374	up				HOVUSG0896500	1.013	0.0199934	up				HOVUSG0907700	-1.222	0.000925295	down
HOVUSG0848200	-1.192	0.00702382	down				HOVUSG1208100	2.407	3.6953e-06	up				HOVUSG1152200	-9.539	4.20296e-12	down				HOVUSG0818600	1.197	0.0303169	up				HOVUSG0898200	2.02	0.00629851	up				HOVUSG0908700	2.198	0.0222827	up
HOVUSG0858300	1.148	0.000745691	up				HOVUSG1208300	1.266	0.00126751	up				HOVUSG1152300	-6.776	0.00016868	down				HOVUSG0819400	6.046	0.0313313	up				HOVUSG0915800	1.004	0.028176	up				HOVUSG0909500	-1.477	0.0104459	down
HOVUSG0859400	1.451	4.15549e-06	up				HOVUSG1209600	-3.219	0.0409948	down				HOVUSG1154300	-3.456	0.00576924	down				HOVUSG0819500	5.177	0.00111134	up				HOVUSG0917900	1.044	0.00300135	up				HOVUSG0914700	6.067	0.00691344	up
HOVUSG0860100	-2.607	1.56137e-14	down				HOVUSG1209900	-7.114	6.50628e-05	down				HOVUSG1157200	-10.296	3.90099e-15	down				HOVUSG0821900	2.991	0.00477575	up				HOVUSG0925600	-1.201	0.00200077	down				HOVUSG0916400	2.755	0.000616246	up
HOVUSG0862500	-11.964	4.18214e-21	down				HOVUSG1210000	-6.37	0.00225752	down				HOVUSG1157300	1.863	0.000333222	up				HOVUSG0822000	1.129	0.000995022	up				HOVUSG0927300	-1.01	0.00163202	down				HOVUSG0919200	6.691	0.000274088	up
HOVUSG0866400	-1.277	0.00327789	down				HOVUSG1210500	1.045	0.0242692	up				HOVUSG1162800	1.731	0.0191686	up				HOVUSG0824500	2.43	0.0457293	up				HOVUSG0930200	3.457	9.28888e-11	up				HOVUSG0924400	5.878	0.00794647	up
HOVUSG0868100	-1.034	0.00072369	down				HOVUSG1210800	1.668	0.0144673	up				HOVUSG1175800	-1.049	0.0132675	down				HOVUSG0826800	-3.231	0.0102262	down				HOVUSG0937400	1.257	0.00769104	up				HOVUSG0924600	-1.607	3.1929e-06	down
HOVUSG0868400	3.035	1.39326e-06	up				HOVUSG1211700	-4.103	2.14024e-10	down				HOVUSG1182300	2.106	4.92276e-09	up				HOVUSG0828300	4.537	0.0305789	up				HOVUSG0937500	1.805	1.13911e-05	up				HOVUSG0927300	-1.286	0.000115203	down
HOVUSG0874400	-1.032	0.0094545	down				HOVUSG1213800	-1.814	0.000722176	down				HOVUSG1182700	-1.331	0.000717221	down				HOVUSG0829000	1.043	0.000900224	up				HOVUSG0945500	-1.191	0.00160077	down				HOVUSG0930200	2.749	1.41259e-07	up
HOVUSG0876300	-1.741	0.00141143	down				HOVUSG1213900	-1.421	0.0115418	down				HOVUSG1182800	-1.627	4.89977e-06	down				HOVUSG0830300	3.701	0.000307879	up				HOVUSG0946300	-1.805	0.00397316	down				HOVUSG0931700	5.8	0.0130907	up
HOVUSG0880400	-1.228	0.0191405	down				HOVUSG1220900	11.368	4.17993e-18	up				HOVUSG1188800	5.395	0.0450639	up				HOVUSG0830800	5.609	1.88846e-09	up				HOVUSG0949000	4.639	0.0209679	up				HOVUSG0932000	-2.567	4.07011e-09	down
HOVUSG0880800	6.667	0.000139447	up				HOVUSG1221000	12.593	6.70192e-23	up				HOVUSG1190300	3.139	1.38776e-11	up				HOVUSG0832000	-1.862	9.86847e-11	down				HOVUSG0950800	9.777	5.22709e-13	up				HOVUSG0937500	1.346	0.0212514	up
HOVUSG0884700	8.718	3.45671e-10	up				HOVUSG1223500	-1.753	0.0189599	down				HOVUSG1191000	2.972	2.14416e-09	up				HOVUSG0832300	1.146	0.00186255	up				HOVUSG0950900	6.041	0.00519397	up				HOVUSG0942700	-1.476	0.00321502	down
HOVUSG0888800	-1.78	7.24889e-10	down				HOVUSG1224100	1.077	0.0488814	up				HOVUSG1200200	-1.204	0.0262932	down				HOVUSG0833200	7.935	1.11234e-07	up				HOVUSG0951300	2.186	5.27734e-05	up				HOVUSG0945500	-1.098	0.000253353	down
HOVUSG0889900	1.695	0.000293137	up				HOVUSG1224200	-1.797	9.22772e-07	down				HOVUSG1200500	3.248	0.0285771	up				HOVUSG0833500	-6.652	0.000161711	down				HOVUSG0953900	-1.426	0.00197289	down				HOVUSG0946300	-2.104	0.000287214	down
HOVUSG0890000	2.668	7.14665e-07	up				HOVUSG1229600	-4.986	0.0018685	down				HOVUSG1207500	-1.756	0.00158909	down				HOVUSG0840100	-2.873	6.71447e-15	down				HOVUSG0955600	9.11	6.27638e-11	up				HOVUSG0949000	5.13	0.0022378	up
HOVUSG0890400	-1.342	0.00628298	down				HOVUSG1234600	-1.623	0.000536257	down				HOVUSG1207800	7.382	6.51106e-06	up				HOVUSG0840500	-1.733	1.30632e-07	down				HOVUSG0956300	-1.676	0.0401791	down				HOVUSG0950800	9.94	1.18137e-13	up
HOVUSG0891300	-5.658	0.014378	down				HOVUSG1237700	1.17	0.0143688	up				HOVUSG1207900	6.098	0.000760789	up				HOVUSG0841100	-8.025	1.52441e-07	down				HOVUSG0956400	-1.916	0.00525176	down				HOVUSG0950900	5.796	0.0130681	up
HOVUSG0893900	1.035	2.36744e-05	up				HOVUSG1238900	-1.906	0.0040127	down				HOVUSG1208000	2.067	0.000694993	up				HOVUSG0841300	-6.907	7.53616e-06	down				HOVUSG0958500	-1.614	1.62e-06	down				HOVUSG0951100	-1.132	0.00275815	down
HOVUSG0895800	-5.758	0.0052567	down				HOVUSG1243600	-1.179	0.00670021	down				HOVUSG1208100	2.775	2.38341e-14	up				HOVUSG0841900	-1.52	0.000251591	down				HOVUSG0960500	1.041	0.0165357	up				HOVUSG0953900	-1.821	9.56689e-07	down
HOVUSG0909000	1.673	0.000271305	up				HOVUSG1247000	-1.175	0.0182424	down				HOVUSG1209900	-6.369	0.00088103	down				HOVUSG0842400	-2.842	0.000165639	down				HOVUSG0961600	-2.047	1.76617e-08	down				HOVUSG0956200	3.411	4.84622e-13	up
HOVUSG0909500	1.134	0.000822139	up				HOVUSG1250800	-3.018	8.88866e-08	down				HOVUSG1210000	-6.44	0.000568147	down				HOVUSG0842500	1.511	3.82265e-15	up				HOVUSG0962500	-1.031	0.0299585	down				HOVUSG0956400	-1.27	0.0103595	down
HOVUSG0910900	-5.15	0.0449953	down				HOVUSG1251900	1.974	0.0001712	up				HOVUSG1210500	-1.349	0.02871	down				HOVUSG0842600	5.853	0.00615203	up				HOVUSG0963800	1.214	0.00149449	up				HOVUSG0961600	-2.495	1.78901e-14	down
HOVUSG0927300	-1.093	1.87675e-12	down				HOVUSG1253700	-9.664	1.38149e-12	down				HOVUSG1210800	1.468	2.83981e-08	up				HOVUSG0843000	3.04	2.39677e-33	up				HOVUSG0964400	2.386	0.0109295	up				HOVUSG0962500	-1.273	0.00315207	down
HOVUSG0929300	-1.239	0.001001	down				HOVUSG1257300	-1.356	0.0167849	down				HOVUSG1211700	-6.577	9.37753e-14	down				HOVUSG0844800	-2.675	2.71325e-08	down				HOVUSG0964600	1.713	0.00830134	up				HOVUSG0963300	1.606	0.0308307	up
HOVUSG0930200	-1.603	0.00360897	down				HOVUSG1259200	-3.288	0.0151409	down				HOVUSG1213100	1.04	0.00449966	up				HOVUSG0845400	2.16	0.0397851	up				HOVUSG0964800	2.739	0.000666779	up				HOVUSG0965700	3.013	0.00455679	up
HOVUSG0933400	-1.069	0.0029722	down				HOVUSG1260000	-6.864	0.000197198	down				HOVUSG1214700	-1.549	0.0108384	down				HOVUSG0845500	2.74	0.00390405	up				HOVUSG0967200	-1.854	8.8729e-06	down				HOVUSG0970900	3.551	0.00212324	up
HOVUSG0937500	-1.113	0.000114385	down				HOVUSG1260100	7.055	0.000103196	up				HOVUSG1214900	-2.372	0.000293253	down				HOVUSG0846300	5.204	0.00143957	up				HOVUSG0967300	-4.025	8.99279e-19	down				HOVUSG0978100	1.698	0.0129183	up
HOVUSG0944000	-1.044	0.00109688	down				HOVUSG1260300	-2.666	3.26628e-17	down				HOVUSG1215100	-1.599	0.0273667	down				HOVUSG0847500	1.138	0.00594192	up				HOVUSG0969700	1.605	0.0202674	up				HOVUSG0981200	-1.942	1.35869e-07	down
HOVUSG0945700	1.212	0.000579181	up				HOVUSG1260400	-1.017	0.000432222	down				HOVUSG1220000	6.036	6.56758e-10	up				HOVUSG0847600	-2.269	9.42641e-07	down				HOVUSG0970900	2.752	0.0301024	up				HOVUSG0988000	1.493	0.0200742	up
HOVUSG0946600	-2.13	0.000865242	down				HOVUSG1260500	5.486	1.13419e-09	up				HOVUSG1220400	5.265	2.6831e-05	up				HOVUSG0854800	-1.072	0.000662107	down				HOVUSG0971800	2.073	5.47662e-07	up				HOVUSG0991200	1.331	0.000165077	up
HOVUSG0947400	-2.199	5.75297e-06	down				HOVUSG1261000	6.443	0.00445809	up				HOVUSG1223400	1.496	1.5167e-08	up				HOVUSG0858300	2.901	0.00592055	up				HOVUSG0973500	-1.357	0.0226414	down				HOVUSG0991700	-1.451	2.60267e-06	down
HOVUSG0947800	-1.364	0.000201938	down				HOVUSG1261300	-2.806	4.81019e-07	down				HOVUSG1229700	1.142	0.000569534	up				HOVUSG0858700	2.095	0.0300479	up				HOVUSG0977900	1.902	0.00484568	up				HOVUSG0993600	2.87	3.91872e-07	up
HOVUSG0950800	9.704	4.80997e-13	up				HOVUSG1263000	-9.333	6.64262e-12	down				HOVUSG1234500	1.228	0.0165408	up				HOVUSG0859700	1.496	0.000434089	up				HOVUSG0978100	1.925	0.00505226	up				HOVUSG0997400	5.738	3.64435e-07	up
HOVUSG0950900	5.816	0.0109656	up				HOVUSG1266700	-2.231	0.0110232	down				HOVUSG1234600	-1.299	0.0190779	down				HOVUSG0860800	-1.182	0.000356503	down				HOVUSG0988400	1.423	0.000654194	up				HOVUSG0998800	3.813	4.60297e-23	up
HOVUSG0951300	1.262	0.0193724	up				HOVUSG1266800	-6.534	0.00146469	down				HOVUSG1234700	5.273	0.00172161	up				HOVUSG0862700	1.552	0.043889	up				HOVUSG0991200	2.188	7.54562e-08	up				HOVUSG0999300	-1.523	0.0440295	down
HOVUSG0953400	-1.62	2.10912e-07	down				HOVUSG1268900	-7.673	1.45974e-05	down				HOVUSG1235700	1.625	0.00660528	up				HOVUSG0862800	1.182	0.00154799	up				HOVUSG0991700	-1.082	0.0143297	down				HOVUSG0999800	2.932	0.00229253	up
HOVUSG0953600	-1.981	0.00012667	down				HOVUSG1276900	-2.344	1.90888e-07	down				HOVUSG1236200	2.333	0.00189811	up				HOVUSG0866400	1.06	0.0347794	up				HOVUSG0993600	1.717	0.00854382	up				HOVUSG1001900	2.263	0.0221123	up
HOVUSG0955600	8.442	4.22873e-09	up				HOVUSG1279800	8.517	4.93314e-08	up				HOVUSG1236300	1.41	0.00132791	up				HOVUSG0873900	-1.359	0.00347672	down				HOVUSG0995100	4.571	0.0347079	up				HOVUSG1005600	2.501	0.0135043	up
HOVUSG0955700	5.284	0.0320649	up				HOVUSG1280100	6.645	0.00424381	up				HOVUSG1237500	-1.534	0.0163197	down				HOVUSG0881600	1.375	0.000264978	up				HOVUSG0997400	5.472	1.33143e-07	up				HOVUSG1021600	3.834	7.47724e-34	up
HOVUSG0956300	-4.06	4.00176e-07	down				HOVUSG1283000	-9.577	2.63423e-12	down				HOVUSG1237600	-9.733	3.66163e-07	down				HOVUSG0883000	1.282	0.0134073	up				HOVUSG0998500	3.38	2.27463e-08	up				HOVUSG1023700	-1.84	0.000199511	down
HOVUSG0956400	-3.133	4.91316e-11	down				HOVUSG1291100	2.011	8.33365e-06	up				HOVUSG1238200	7.585	1.52033e-05	up				HOVUSG0884700	8.763	6.59597e-10	up				HOVUSG0999700	1.22	0.00876913	up				HOVUSG1024500	-3.602	3.43975e-10	down
HOVUSG0957200	7.965	5.23238e-08	up				HOVUSG1295900	-10.304	6.00254e-20	down				HOVUSG1238700	1.364	0.0362633	up				HOVUSG0886400	-1.235	2.68266e-06	down				HOVUSG0999800	3.12	0.000568842	up				HOVUSG1025100	-1.075	0.00818338	down
HOVUSG0960500	-2.136	4.60194e-10	down				HOVUSG1296000	-1.089	1.07111e-05	down				HOVUSG1238900	-2.808	1.22172e-09	down				HOVUSG0894900	1.039	4.83266e-05	up				HOVUSG1001900	3.754	8.0572e-10	up				HOVUSG1025400	-1.367	0.00472097	down
HOVUSG0961900	-1.102	0.015122	down				HOVUSG1296300	-1.422	0.047641	down				HOVUSG1249500	3.137	0.00123277	up				HOVUSG0897000	-1.174	0.00160021	down				HOVUSG1002400	2.97	1.60533e-07	up				HOVUSG1029200	3.326	0.0061645	up
HOVUSG0963800	-1.022	6.5204e-06	down				HOVUSG1310500	1.769	0.0031526	up				HOVUSG1250800	3.478	0.000248747	up				HOVUSG0897800	3.329	0.00512813	up				HOVUSG1005900	-1.273	0.0186052	down				HOVUSG1030800	2.337	0.0437829	up
HOVUSG0964600	-2.168	2.53744e-22	down				HOVUSG1312100	-3.606	0.00517647	down				HOVUSG1255400	10.717	2.94244e-16	up				HOVUSG0898100	5.433	0.00208868	up				HOVUSG1009100	-1.215	0.00260263	down				HOVUSG1033900	2.751	4.76375e-15	up
HOVUSG0964800	-2.23	9.52161e-09	down				HOVUSG1313000	-1.254	0.0441421	down				HOVUSG1255700	-6.784	0.000130248	down				HOVUSG0903300	1.187	0.0112741	up				HOVUSG1010400	-1.215	0.0169646	down				HOVUSG1035100	-6.724	0.000599629	down
HOVUSG0965100	-1.684	7.28983e-06	down				HOVUSG1318200	-1.115	0.0160244	down				HOVUSG1255900	5.396	0.0450639	up				HOVUSG0908100	-1.08	0.000808616	down				HOVUSG1011400	-1.027	0.00561782	down				HOVUSG1035600	-1.497	0.000446147	down
HOVUSG0965200	-2.58	0.0249883	down				HOVUSG1325300	2.344	9.70007e-05	up				HOVUSG1256100	7.684	1.4381e-06	up				HOVUSG0909000	3.837	0.00135143	up				HOVUSG1013900	6.348	0.00240923	up				HOVUSG1037800	-3.721	0.0477055	down
HOVUSG0965500	-2.69	0.0146343	down				HOVUSG1329400	-1.185	0.0346772	down				HOVUSG1256400	4.116	6.92155e-21	up				HOVUSG0909500	2.477	7.53814e-10	up				HOVUSG1016600	2.015	0.00214612	up				HOVUSG1039900	7.441	1.52858e-09	up
HOVUSG0967300	-2.87	5.53619e-29	down				HOVUSG1344500	-5.831	1.74991e-06	down				HOVUSG1257300	-1.881	4.34997e-11	down				HOVUSG0909900	2.059	0.000106698	up				HOVUSG1017000	-1.407	0.00525176	down				HOVUSG1040100	4.188	1.02904e-06	up
HOVUSG0969200	-1.095	0.0002297	down				HOVUSG1350100	3.218	0.0118474	up				HOVUSG1257700	-7.6	1.74365e-05	down				HOVUSG0912300	-4.259	0.00681641	down				HOVUSG1018000	2.701	0.00758773	up				HOVUSG1042600	2.407	0.00170299	up
HOVUSG0969700	-1.168	0.000498431	down				HOVUSG1356400	-6.203	0.00505223	down				HOVUSG1259400	-3.491	3.78399e-13	down				HOVUSG0914000	-1.062	0.00754667	down				HOVUSG1020200	-1.128	0.0226111	down				HOVUSG1042700	5.73	3.27375e-10	up
HOVUSG0972800	-3.276	7.94418e-13	down				HOVUSG1356500	-5.793	0.0412221	down				HOVUSG1260000	-6.865	7.18324e-05	down				HOVUSG0915400	5.192	0.0426899	up				HOVUSG1021600	3.411	3.13077e-19	up				HOVUSG1043800	-1.113	0.000268582	down
HOVUSG0977000	-2.621	1.22667e-10	down				HOVUSG1366100	-1.386	0.00761771	down				HOVUSG1260200	-2.411	0.0233174	down				HOVUSG0919200	7.225	1.19449e-05	up				HOVUSG1024500	-4.746	5.46113e-34	down				HOVUSG1045700	-1.891	1.19556e-08	down
HOVUSG0977300	4.67	2.1318e-07	up				HOVUSG1367600	2.001	0.0156965	up				HOVUSG1260300	-2.171	1.41024e-06	down				HOVUSG0919500	-1.125	0.000773485	down				HOVUSG1033900	2.07	0.0110428	up				HOVUSG1046300	-2.426	3.35215e-05	down
HOVUSG0977500	7.003	0.000165696	up				HOVUSG1369800	-5.779	0.0293766	down				HOVUSG1260500	2.33	1.58595e-06	up				HOVUSG0924400	6.55	0.000846164	up				HOVUSG1034900	2.692	1.46186e-06	up				HOVUSG1047900	8.074	1.33583e-07	up
HOVUSG0977800	1.806	2.64463e-11	up				HOVUSG1370500	-1.799	0.00409026	down				HOVUSG1260600	-8.075	4.14739e-08	down				HOVUSG0926500	-1.475	0.000710936	down				HOVUSG1035100	2.52	0.000163987	up				HOVUSG1050100	7.241	1.07756e-05	up
HOVUSG0979100	-1.046	0.0151422	down				HOVUSG1370800	1.263	0.00126789	up				HOVUSG1261300	-2.646	1.04075e-08	down				HOVUSG0930200	-1.715	0.020554	down				HOVUSG1035800	2.179	4.78288e-06	up				HOVUSG1051600	-1.238	0.0182265	down
HOVUSG0988300	1.327	0.000136817	up				HOVUSG1370900	4.652	0.000367514	up				HOVUSG1263000	-8.806	6.96906e-10	down				HOVUSG0933400	-1.956	0.00105617	down				HOVUSG1045700	-1.84	1.50989e-07	down				HOVUSG1053800	-7.458	0.00016611	down
HOVUSG0996500	-3.631	0.0295615	down				HOVUSG1371000	5.844	3.06357e-06	up				HOVUSG1266500	-2.053	0.00332274	down				HOVUSG0934000	-1.606	0.0250573	down				HOVUSG1046300	-2.198	0.00106897	down				HOVUSG1054000	-1.529	0.00401611	down
HOVUSG1005100	7.257	1.00862e-05	up				HOVUSG1371800	1.679	0.047641	up				HOVUSG1266900	2.397	0.0257069	up				HOVUSG0945500	-1.391	1.31539e-10	down				HOVUSG1047900	7.582	6.43894e-06	up				HOVUSG1056700	1.472	0.00140355	up
HOVUSG1009100	1	9.52572e-05	up				HOVUSG1372700	-2.844	0.00896596	down				HOVUSG1267000	1.924	0.0452943	up				HOVUSG0950800	5.067	0.0487154	up				HOVUSG1053800	-7.542	0.000128809	down				HOVUSG1057100	1.331	0.00069735	up
HOVUSG1011400	-1.125	1.75148e-09	down				HOVUSG1373200	5.656	6.34412e-05	up				HOVUSG1270200	1.308	0.0037716	up				HOVUSG0951300	1.799	0.00183011	up				HOVUSG1054200	-1.754	1.21959e-05	down				HOVUSG1070000	6.453	0.000733427	up
HOVUSG1013900	5.637	0.0102532	up				HOVUSG1375100	-1.997	0.000373371	down				HOVUSG1274200	1.87	3.91853e-06	up				HOVUSG0953900	-2.355	0.00109074	down				HOVUSG1057100	1.63	3.57516e-05	up				HOVUSG1070900	4.42	0.000264501	up
HOVUSG1016800	1.99	0.00301295	up				HOVUSG1378000	-1.465	0.00438055	down				HOVUSG1279500	1.613	0.0187186	up				HOVUSG0956200	2.589	1.32225e-10	up				HOVUSG1064400	-5.51	0.0486644	down				HOVUSG1071300	3.205	0.0156922	up
HOVUSG1018400	-1.14	0.0387964	down				HOVUSG1381000	1.555	0.046956	up				HOVUSG1284200	1.174	0.000181949	up				HOVUSG0956300	1.306	0.0219987	up				HOVUSG1070900	4.037	0.001259	up				HOVUSG1071400	2.444	0.0137828	up
HOVUSG1021900	-5.137	0.0428689	down				HOVUSG1388200	6.442	0.033419	up				HOVUSG1286400	-1.806	2.4353e-08	down				HOVUSG0956400	1.968	0.000508809	up				HOVUSG1073300	1.648	3.51407e-06	up				HOVUSG1072000	1.922	0.000933606	up
HOVUSG1034900	-2.933	8.67003e-06	down				HOVUSG1389200	5.944	1.30099e-16	up				HOVUSG1289000	-2.961	4.32723e-10	down				HOVUSG0958300	-1.19	2.79933e-09	down				HOVUSG1074500	1.429	0.00225434	up				HOVUSG1073300	1.697	0.000988691	up
HOVUSG1035800	-2.115	0.0343842	down				HOVUSG1399200	-1.685	6.34412e-05	down				HOVUSG1291100	-1.127	0.000130003	down				HOVUSG0959600	4.729	0.00980356	up				HOVUSG1074800	1.04	0.00743076	up				HOVUSG1076700	-1.333	0.0013371	down
HOVUSG1039600	-1.529	0.000153543	down				HOVUSG1400200	3.596	0.0346741	up				HOVUSG1303600	4.058	5.34644e-14	up				HOVUSG0961300	1.019	0.000957616	up				HOVUSG1076500	-1.214	0.00680192	down				HOVUSG1077800	-1.572	0.0122479	down
HOVUSG1041000	1.032	4.3944e-07	up				HOVUSG1412600	-6.516	0.00112864	down				HOVUSG1305100	-2.019	7.73333e-06	down				HOVUSG0961600	-1.409	0.000234294	down				HOVUSG1076700	-1.618	0.000949847	down				HOVUSG1081100	2.007	9.8934e-06	up
HOVUSG1041800	3.56	0.0193086	up				HOVUSG1412700	1.001	0.047641	up				HOVUSG1311500	-1.197	0.0117977	down				HOVUSG0963300	-1.595	0.0198573	down				HOVUSG1081100	2.678	2.74126e-10	up				HOVUSG1082300	5.785	0.0205747	up
HOVUSG1042900	5.365	0.0239613	up				HOVUSG1419100	-6.221	8.70392e-06	down				HOVUSG1312300	-2.37	0.0114174	down				HOVUSG0963400	1.017	1.38978e-07	up				HOVUSG1091500	-4.973	3.44272e-05	down				HOVUSG1091500	-4.315	3.66656e-05	down
HOVUSG1044000	1.046	0.014378	up				HOVUSG1430400	-2.126	0.0327409	down				HOVUSG1318200	1.527	0.0108023	up				HOVUSG0967000	-1.031	0.00038866	down				HOVUSG1091700	2.203	0.000226987	up				HOVUSG1091700	2.135	0.000166517	up
HOVUSG1044100	1.068	0.0140556	up				HOVUSG1431300	-1.153	0.00664531	down				HOVUSG1319700	-6.642	0.000270316	down				HOVUSG0969400	-2.046	0.000151561	down				HOVUSG1094300	-2.476	3.90568e-05	down				HOVUSG1094300	-2.817	1.25174e-07	down
HOVUSG1044700	-8.437	5.64086e-09	down				HOVUSG1431800	1.615	0.0149931	up				HOVUSG1321800	1.859	0.019595	up				HOVUSG0971800	-1.695	0.000176593	down				HOVUSG1099200	-4.432	0.0166296	down				HOVUSG1104100	-5.647	0.00134405	down
HOVUSG1044800	-4.961	0.0155029	down				HOVUSG1433500	1.239	0.00197769	up				HOVUSG1322400	-10.599	5.85284e-16	down				HOVUSG0972200	-1.735	0.0258917	down				HOVUSG1099600	-1.021	0.0201834	down				HOVUSG1104800	-1.64	4.29573e-05	down
HOVUSG1045700	-1.024	0.00287986	down				HOVUSG1439500	1.111	0.00700839	up				HOVUSG1322500	-7.665	1.64527e-06	down				HOVUSG0979100	-1.594	0.00439073	down				HOVUSG1104100	-3.868	0.00769104	down				HOVUSG1106200	-4.609	2.23034e-14	down
HOVUSG1046300	-1.076	0.00229663	down				HOVUSG1448400	1.479	0.00437393	up				HOVUSG1322600	-5.878	0.0070603	down				HOVUSG0980200	1.164	0.00106885	up				HOVUSG1104800	-2.046	0.000344216	down				HOVUSG1107300	2.052	2.84479e-05	up
HOVUSG1046700	-3.417	0.0121255	down				HOVUSG1451300	9.328	1.81624e-11	up				HOVUSG1322700	-6.463	0.00050295	down				HOVUSG0981000	-2.279	0.0315631	down				HOVUSG1105900	3.216	0.00423894	up				HOVUSG1108800	1.594	0.0414701	up
HOVUSG1046900	4.4	0.0138516	up				HOVUSG1461200	-1.629	0.000804617	down				HOVUSG1327700	4.523	0.00168579	up				HOVUSG0989400	-2.105	0.00243374	down				HOVUSG1106200	-2.996	3.99959e-14	down				HOVUSG1109500	-8.808	8.09472e-10	down
HOVUSG1047900	6.66	0.000135649	up				HOVUSG1463200	-6.24	0.00591169	down				HOVUSG1330700	2.154	0.00915293	up				HOVUSG0994100	1.612	9.44215e-05	up				HOVUSG1106400	-1.314	0.00192228	down				HOVUSG1109800	-3.437	0.000137264	down
HOVUSG1054000	1.273	7.13359e-05	up				HOVUSG1470600	-8.64	5.57133e-09	down				HOVUSG1332300	1.003	0.0080737	up				HOVUSG0995100	-6.972	1.34126e-07	down				HOVUSG1108500	-1.504	0.0206586	down				HOVUSG1110700	1.32	9.98405e-07	up
HOVUSG1054200	-1.706	1.06585e-19	down				HOVUSG1472700	-6.96	0.000115162	down				HOVUSG1332900	1.404	6.97284e-05	up				HOVUSG0995700	-1.264	2.53846e-07	down				HOVUSG1108800	1.72	0.0313998	up				HOVUSG1113200	-5.427	0.0409145	down
HOVUSG1056200	-1.094	0.0132991	down				HOVUSG1473400	-6.373	1.1875e-08	down				HOVUSG1333200	5.951	0.00792731	up				HOVUSG0998500	2.249	2.45984e-05	up				HOVUSG1109300	-2.529	7.24437e-06	down				HOVUSG1114100	2.209	0.0151216	up
HOVUSG1057100	-1.242	0.00055345	down				HOVUSG1476100	-11.675	4.27206e-19	down				HOVUSG1334100	2.872	3.64139e-08	up				HOVUSG0998800	1.954	1.04762e-06	up				HOVUSG1109500	-2.857	0.000340416	down				HOVUSG1114800	-2.114	8.47809e-05	down
HOVUSG1064400	3.374	0.0314447	up				HOVUSG1479000	-3.103	0.0394091	down				HOVUSG1335600	6.361	0.0016349	up				HOVUSG1000000	1.192	0.000900822	up				HOVUSG1109800	-2.983	0.000133078	down				HOVUSG1116400	1.177	0.00114813	up
HOVUSG1068000	1.283	6.98886e-06	up				HOVUSG1480400	2.347	0.0134147	up				HOVUSG1335900	7.259	2.48317e-05	up				HOVUSG1001100	-1.67	0.000753132	down				HOVUSG1110700	1.639	7.36111e-08	up				HOVUSG1117400	-3.019	1.45614e-12	down
HOVUSG1073300	-1.283	1.19554e-06	down				HOVUSG1487900	6.319	0.00573813	up				HOVUSG1340900	2.122	0.0118555	up				HOVUSG1001700	1.428	0.000146374	up				HOVUSG1111100	2.407	0.0067239	up				HOVUSG1118000	1.399	3.84673e-08	up
HOVUSG1075700	1.289	0.0224406	up				HOVUSG1495200	1.967	0.012007	up				HOVUSG1346600	-1.045	0.000448925	down				HOVUSG1003200	2.169	9.14642e-05	up				HOVUSG1113200	-5.516	0.0420078	down				HOVUSG1121500	-1.004	0.0369454	down
HOVUSG1076500	-1.853	0.00566426	down				HOVUSG1495400	-5.617	4.11047e-34	down				HOVUSG1349900	-1.454	0.000119365	down				HOVUSG1015400	-1.059	0.0203939	down				HOVUSG1114100	1.953	0.0362666	up				HOVUSG1121600	-1.263	0.00421365	down
HOVUSG1076600	-1.595	0.00385703	down				HOVUSG1497600	1.216	0.0156897	up				HOVUSG1355400	5.564	0.0326051	up				HOVUSG1015700	-1.008	0.000300974	down				HOVUSG1117800	2.695	0.0193082	up				HOVUSG1121800	2.779	0.00698805	up
HOVUSG1079200	-1.566	0.0197415	down				HOVUSG1499800	-1.963	3.60797e-05	down				HOVUSG1356400	-6.706	1.63763e-17	down				HOVUSG1016300	-2.061	0.010729	down				HOVUSG1120200	1.405	0.000321905	up				HOVUSG1127400	1.79	0.0312729	up
HOVUSG1079400	-1.384	1.54842e-16	down				HOVUSG1504500	-10.6	2.38863e-15	down				HOVUSG1356500	-6.45	2.33894e-12	down				HOVUSG1016800	-2.26	6.3755e-11	down				HOVUSG1121500	-1.537	5.27734e-05	down				HOVUSG1129000	2.093	0.000342206	up
HOVUSG1079900	1.41	0.00916128	up				HOVUSG1505400	-1.412	0.0383912	down				HOVUSG1363500	7.826	5.67319e-07	up				HOVUSG1020200	1.276	2.98015e-05	up				HOVUSG1121800	3.174	8.71907e-05	up				HOVUSG1130200	-1.542	0.012595	down
HOVUSG1081100	-1.254	4.02235e-05	down				HOVUSG1520100	2.485	6.69613e-06	up				HOVUSG1363600	-5.984	0.00449966	down				HOVUSG1021600	2.134	4.02958e-11	up				HOVUSG1125800	1.164	0.0245577	up				HOVUSG1134300	2.978	3.63134e-07	up
HOVUSG1088500	1.32	3.34103e-05	up				HOVUSG1522000	-1.363	0.00363709	down				HOVUSG1366100	1.326	0.0180396	up				HOVUSG1022100	5.294	0.0402631	up				HOVUSG1127400	2.426	1.42796e-05	up				HOVUSG1137000	2.862	8.07695e-05	up
HOVUSG1091500	-3.438	0.0447744	down				HOVUSG1528200	10.555	1.63471e-15	up				HOVUSG1367600	1.502	0.00581788	up				HOVUSG1022500	2.998	0.00213712	up				HOVUSG1129000	1.617	0.0410323	up				HOVUSG1138300	-1.365	0.0499665	down
HOVUSG1094300	-3.877	1.47098e-07	down				HOVUSG1528300	9.014	5.98126e-10	up				HOVUSG1369400	2.783	0.00410881	up				HOVUSG1024500	-4.998	0.00477569	down				HOVUSG1130200	-3.525	0.0301225	down				HOVUSG1142200	1.641	7.34682e-05	up
HOVUSG1096600	1.077	1.10642e-05	up				HOVUSG1534500	1.419	0.000673667	up				HOVUSG1370000	3.807	2.41519e-06	up				HOVUSG1026900	-1.12	0.000616893	down				HOVUSG1134300	2.526	4.27333e-08	up				HOVUSG1142800	1.846	0.0241466	up
HOVUSG1104600	-2.975	0.0355295	down				HOVUSG1541200	8.494	3.81749e-08	up				HOVUSG1370400	6.265	0.00222875	up				HOVUSG1033700	1.661	4.61437e-06	up				HOVUSG1137000	3.805	3.49989e-17	up				HOVUSG1150600	-1.558	4.59761e-05	down
HOVUSG1104800	-1.465	0.020133	down				HOVUSG1543700	-3.754	7.88626e-06	down				HOVUSG1371900	2.178	0.0290458	up				HOVUSG1035100	-7.364	3.70218e-06	down				HOVUSG1138300	-1.417	0.0410461	down				HOVUSG1155100	4.589	0.00238975	up
HOVUSG1105000	-1.375	0.0166062	down				HOVUSG1544100	9.896	1.24745e-26	up				HOVUSG1372700	1.174	9.15184e-06	up				HOVUSG1038600	1.744	0.00448692	up				HOVUSG1142200	1.076	0.0172676	up				HOVUSG1166200	-1.825	4.21455e-07	down
HOVUSG1105900	1.627	8.94575e-15	up				HOVUSG1549000	-1.087	0.00428366	down				HOVUSG1375100	1.722	0.000744255	up				HOVUSG1038800	3.239	0.000475962	up				HOVUSG1150600	-1.512	0.000348389	down				HOVUSG1166900	1.077	0.0416082	up
HOVUSG1106100	3.344	0.0409215	up				HOVUSG1554800	-1.226	0.0031322	down				HOVUSG1378400	1.666	0.0224269	up				HOVUSG1039600	1.286	0.00872574	up				HOVUSG1152200	-10.675	1.02575e-15	down				HOVUSG1167400	-1.126	0.000605222	down
HOVUSG1106600	1.131	2.45912e-09	up				HOVUSG1555900	-1.061	0.00267345	down				HOVUSG1383000	5.684	0.0183837	up				HOVUSG1039900	2.964	1.38079e-08	up				HOVUSG1152300	-6.799	0.000654225	down				HOVUSG1174500	8.065	6.40638e-08	up
HOVUSG1107700	-2.659	0.0258863	down				HOVUSG1556200	2.684	1.04144e-09	up				HOVUSG1390200	-1.261	0.0111526	down				HOVUSG1040100	2.911	0.00194088	up				HOVUSG1154300	-4.054	6.07548e-06	down				HOVUSG1182300	3.021	1.66313e-11	up
HOVUSG1108500	4.475	3.02961e-05	up				HOVUSG1557200	4.654	1.40264e-15	up				HOVUSG1412700	-1.79	0.00135446	down				HOVUSG1042000	5.243	0.0438981	up				HOVUSG1155100	3.748	6.29214e-06	up				HOVUSG1182700	-1.678	4.08746e-06	down
HOVUSG1108800	-1.245	0.0300604	down				HOVUSG1559100	1.802	0.000134613	up				HOVUSG1416800	-5.469	8.578e-11	down				HOVUSG1047500	-6.275	0.00329142	down				HOVUSG1157200	-10.507	3.11711e-15	down				HOVUSG1186100	1.719	0.000646457	up
HOVUSG1109500	-5.564	1.84355e-05	down				HOVUSG1559200	1.032	0.00462668	up				HOVUSG1422200	-2.839	0.0173988	down				HOVUSG1047900	4.853	0.0328759	up				HOVUSG1166900	1.522	0.00199082	up				HOVUSG1189400	2.022	0.00170804	up
HOVUSG1110500	1.867	0.0004246	up				HOVUSG1560400	-4.014	2.01666e-06	down				HOVUSG1425100	2.125	0.0139238	up				HOVUSG1050200	-2.326	4.95201e-05	down				HOVUSG1172100	1.077	0.00073865	up				HOVUSG1190300	-1.163	0.041423	down
HOVUSG1112700	1.452	0.000148276	up				HOVUSG1560600	-1.061	0.037126	down				HOVUSG1430700	-2.118	0.0094342	down				HOVUSG1051100	-1.61	2.66667e-11	down				HOVUSG1175600	-1.175	0.000738258	down				HOVUSG1191000	-2.163	0.000110364	down
HOVUSG1113200	-7.584	1.68254e-15	down				HOVUSG1572300	-1.518	0.0105902	down				HOVUSG1431300	1.205	0.004087	up				HOVUSG1053700	-6.707	0.000207114	down				HOVUSG1178700	-2.729	0.000431573	down				HOVUSG1193900	3.788	4.02007e-07	up
HOVUSG1114200	-5.961	0.00240474	down				HOVUSG1584500	-2.312	0.0403168	down				HOVUSG1446300	-7.773	3.00786e-07	down				HOVUSG1053800	-6.937	4.74608e-05	down				HOVUSG1182300	2.779	1.78639e-08	up				HOVUSG1194500	1.936	9.08598e-05	up
HOVUSG1117400	-1.044	1.04983e-05	down				HOVUSG1591600	-1.069	0.0474796	down				HOVUSG1451700	-1.304	0.0253381	down				HOVUSG1054200	-2.247	3.17666e-23	down				HOVUSG1182400	1.636	0.00906086	up				HOVUSG1195100	-1.536	1.85059e-08	down
HOVUSG1117500	-1.157	0.0399054	down				HOVUSG1594900	-1.99	2.50971e-05	down				HOVUSG1456200	2.763	0.016464	up				HOVUSG1055900	3.188	0.00748232	up				HOVUSG1182700	-2.142	5.2496e-08	down				HOVUSG1195800	-6.766	0.000372717	down
HOVUSG1121800	-2.661	0.017598	down				HOVUSG1595000	-1.927	1.40884e-07	down				HOVUSG1458300	1.45	0.0325505	up				HOVUSG1056000	-1.214	1.57435e-07	down				HOVUSG1184400	1.56	3.54008e-06	up				HOVUSG1196000	1.19	0.0141734	up
HOVUSG1122100	-2.4	2.26451e-07	down				HOVUSG1595600	-5.012	0.0128529	down				HOVUSG1461600	3.94	0.0003189	up				HOVUSG1057100	-1.346	3.10028e-05	down				HOVUSG1186100	2.351	7.52365e-08	up				HOVUSG1200500	-4.272	3.27083e-06	down
HOVUSG1128900	4.274	7.86489e-08	up				HOVUSG1597200	-3.431	0.000253018	down				HOVUSG1462900	5.947	0.0214003	up				HOVUSG1067900	-1.119	0.046035	down				HOVUSG1195100	-1.706	1.14731e-06	down				HOVUSG1206800	-2.044	1.04487e-05	down
HOVUSG1131300	4.938	0.00362667	up				HOVUSG1598700	4.933	2.05199e-16	up				HOVUSG1465500	-1.291	0.00189561	down				HOVUSG1070000	8.347	8.36578e-09	up				HOVUSG1207800	6.463	0.00135097	up				HOVUSG1207800	7.09	2.48701e-05	up
HOVUSG1131700	-1.492	1.51611e-12	down				HOVUSG1601200	1.865	0.00474202	up				HOVUSG1470100	-1.191	0.0415445	down				HOVUSG1073300	1.154	0.000315927	up				HOVUSG1207900	7.004	0.000136911	up				HOVUSG1207900	7.256	1.30647e-05	up
HOVUSG1133800	1.476	0.00284991	up				HOVUSG1603800	-3.006	4.63528e-12	down				HOVUSG1471300	10.786	1.29863e-16	up				HOVUSG1076500	-1.78	2.58429e-08	down				HOVUSG1208100	2.654	1.0697e-09	up				HOVUSG1208100	2.394	2.3035e-12	up
HOVUSG1137000	-1.205	0.00121293	down				HOVUSG1605400	5.714	0.00622884	up				HOVUSG1473400	-6.851	9.20955e-08	down				HOVUSG1078200	1.022	6.43512e-09	up				HOVUSG1209900	-6.348	0.00259133	down				HOVUSG1209900	-6.259	0.00259397	down
HOVUSG1150600	-1.392	3.95357e-07	down				HOVUSG1607500	-1.165	0.00314659	down				HOVUSG1480400	-2.764	5.07978e-08	down				HOVUSG1083200	-2.195	0.00308354	down				HOVUSG1210000	-6.894	0.00017915	down				HOVUSG1210000	-6.807	0.000179086	down
HOVUSG1152200	-11.574	8.45116e-20	down				HOVUSG1608800	-1.632	0.0223127	down				HOVUSG1482300	-2.687	0.0266651	down				HOVUSG1093700	-1.176	0.000562098	down				HOVUSG1210800	1.889	0.000694986	up				HOVUSG1210800	1.579	0.000733962	up
HOVUSG1152300	-8.027	3.23292e-06	down				HOVUSG1614800	-7.777	1.84263e-06	down				HOVUSG1486100	-2.013	0.0228452	down				HOVUSG1094300	-2.792	0.000123159	down				HOVUSG1210900	-1.616	0.00826594	down				HOVUSG1210900	-1.002	0.0315613	down
HOVUSG1154300	-3.235	4.34327e-05	down				HOVUSG1616300	7.155	0.000138213	up				HOVUSG1487000	4.419	0.0265352	up				HOVUSG1105900	1.861	0.00148376	up				HOVUSG1211700	-7.958	4.67629e-11	down				HOVUSG1211700	-4.729	5.06844e-15	down
HOVUSG1155100	-7.95	6.18919e-05	down				HOVUSG1617600	1.135	0.00140371	up				HOVUSG1488000	2.354	0.0217559	up				HOVUSG1106200	-3.522	0.0061511	down				HOVUSG1212600	2.857	0.0261916	up				HOVUSG1213900	-1.416	0.00434701	down
HOVUSG1155600	1.311	0.0266505	up				HOVUSG1617900	4.657	0.000101706	up				HOVUSG1495400	-2.955	5.34433e-15	down				HOVUSG1109500	6.001	0.00677128	up				HOVUSG1223400	2.886	2.02242e-11	up				HOVUSG1220900	10.3	1.53451e-14	up
HOVUSG1157200	-10.063	1.56086e-14	down				HOVUSG1618000	3.051	0.0463831	up				HOVUSG1496200	1.16	0.00113671	up				HOVUSG1113200	-6.798	8.29246e-05	down				HOVUSG1223500	7.832	0.00210359	up				HOVUSG1221000	10.803	1.30112e-16	up
HOVUSG1157300	-2.791	3.31826e-09	down				HOVUSG1620100	-3.511	8.92404e-23	down				HOVUSG1503000	-1.776	0.000246966	down				HOVUSG1114800	2.604	3.09107e-05	up				HOVUSG1229700	1.313	0.00341393	up				HOVUSG1221600	4.261	4.61709e-19	up
HOVUSG1159600	1.861	0.0010446	up				HOVUSG1623200	5.812	0.0242692	up				HOVUSG1505000	3.992	3.04282e-31	up				HOVUSG1117400	-4.057	1.0214e-15	down				HOVUSG1229800	3.063	0.00622622	up				HOVUSG1222000	5.738	0.015369	up
HOVUSG1166900	-1.257	2.44487e-09	down				HOVUSG1623600	-1.48	0.00547959	down				HOVUSG1505400	3.159	6.3368e-06	up				HOVUSG1120200	-3.765	4.72344e-55	down				HOVUSG1234600	-1.439	0.0103128	down				HOVUSG1223500	7.582	5.53259e-13	up
HOVUSG1169000	1.002	0.0411399	up				HOVUSG1623800	-1.307	7.2952e-05	down				HOVUSG1517300	2.343	0.0018628	up				HOVUSG1120600	-2.203	0.0010787	down				HOVUSG1234700	3.909	0.00456389	up				HOVUSG1224200	-1.48	0.00891026	down
HOVUSG1171200	-2.007	0.00325792	down				HOVUSG1624300	-1.253	0.0128022	down				HOVUSG1519100	-1.492	5.90272e-07	down				HOVUSG1121500	-1.202	6.87146e-06	down				HOVUSG1235700	1.85	0.000271558	up				HOVUSG1224300	-1.681	0.0376738	down
HOVUSG1173600	-1.287	2.4125e-05	down				HOVUSG1633800	-1.784	0.00566749	down				HOVUSG1521200	-1.005	3.28843e-06	down				HOVUSG1124600	-2.005	0.0077216	down				HOVUSG1236200	3.111	9.23445e-07	up				HOVUSG1226900	1.369	0.00874808	up
HOVUSG1177200	1.457	0.00279367	up				HOVUSG1636900	-1.292	0.0497508	down				HOVUSG1522800	-2.232	2.03931e-09	down				HOVUSG1128500	-1.269	0.0135872	down				HOVUSG1237600	-7.556	6.46808e-07	down				HOVUSG1229700	2.187	4.02474e-09	up
HOVUSG1178300	-5.591	0.0144249	down				HOVUSG1637500	-1.26	0.00168518	down				HOVUSG1527100	-1.624	0.0144096	down				HOVUSG1129200	-1.452	0.00181447	down				HOVUSG1237800	-1.85	0.0198457	down				HOVUSG1231900	2.296	0.0424619	up
HOVUSG1179700	5.567	0.0139783	up				HOVUSG1638400	3.448	0.0462404	up				HOVUSG1529800	-1.066	0.00297668	down				HOVUSG1130200	-4.433	2.66332e-07	down				HOVUSG1238200	7.97	1.48886e-05	up				HOVUSG1234600	-1.222	0.0364754	down
HOVUSG1182300	1.15	0.00644972	up				HOVUSG1639200	4.491	0.000233412	up				HOVUSG1534500	-5.338	7.61895e-06	down				HOVUSG1131000	-1.747	0.0451958	down				HOVUSG1238900	-1.694	0.0207038	down				HOVUSG1234700	4.062	0.000869432	up
HOVUSG1182700	-1.116	5.05108e-05	down				HOVUSG1651900	1.912	0.00466871	up				HOVUSG1541300	3.528	0.000105576	up				HOVUSG1131200	6.876	0.000208626	up				HOVUSG1239500	-4.778	0.0208783	down				HOVUSG1235700	1.798	0.000428332	up
HOVUSG1184900	1.79	6.11152e-05	up				HOVUSG1657200	2.06	8.35259e-07	up				HOVUSG1549500	3.45	0.019271	up				HOVUSG1131300	3.814	0.00193679	up				HOVUSG1241500	-5.233	0.00462004	down				HOVUSG1237600	-5.634	4.21455e-07	down
HOVUSG1186100	-1.201	0.00502548	down				HOVUSG1658800	-1.779	1.09236e-06	down				HOVUSG1553800	4.066	1.44864e-13	up				HOVUSG1133800	-2.197	2.22975e-05	down				HOVUSG1242900	-1.82	0.000867874	down				HOVUSG1238700	1.613	0.00632527	up
HOVUSG1188100	-1.6	5.97136e-05	down				HOVUSG1659300	-2.205	0.00682143	down				HOVUSG1557200	-5.89	0.0129535	down				HOVUSG1142800	-4.097	1.61345e-07	down				HOVUSG1246400	-2.114	2.55068e-05	down				HOVUSG1239500	-3.663	0.0342272	down
HOVUSG1194900	-1.095	1.08075e-06	down				HOVUSG1659400	-1.517	0.00610665	down				HOVUSG1557500	-1.064	1.79507e-07	down				HOVUSG1146800	1.855	0.00732078	up				HOVUSG1251400	2.344	0.00744093	up				HOVUSG1239600	2.155	0.0157034	up
HOVUSG1198500	-1.162	0.0498756	down				HOVUSG1661200	-1.675	0.000322801	down				HOVUSG1558000	3.082	0.0029525	up				HOVUSG1147900	-1.615	0.0199831	down				HOVUSG1254200	2.052	0.00253817	up				HOVUSG1242900	-1.697	0.000108441	down
HOVUSG1198600	-1.519	0.00303018	down				HOVUSG1661400	-2.672	0.000193609	down				HOVUSG1564200	1.378	0.00289483	up				HOVUSG1150600	-1.683	1.24195e-05	down				HOVUSG1255400	7.529	1.24066e-17	up				HOVUSG1246400	-1.263	0.0416974	down
HOVUSG1201100	-1.478	0.000654195	down				HOVUSG1661900	-1.5	0.0278926	down				HOVUSG1586700	-6.015	0.00494638	down				HOVUSG1157200	-1.402	1.78683e-05	down				HOVUSG1255700	-6.644	0.000600475	down				HOVUSG1247000	2.365	0.0163047	up
HOVUSG1206800	1.4	0.0162239	up				HOVUSG1670900	5.757	0.0405062	up				HOVUSG1594400	-3.777	0.00481845	down				HOVUSG1157300	2.905	3.64978e-11	up				HOVUSG1256100	7.139	4.09423e-05	up				HOVUSG1247600	-1	0.00254758	down
HOVUSG1207800	6.489	0.000317014	up				HOVUSG1671100	-1.071	0.000890235	down				HOVUSG1595000	1.022	0.049892	up				HOVUSG1161400	-6.97	9.21721e-05	down				HOVUSG1256400	6.286	1.00439e-28	up				HOVUSG1249500	-3.917	0.00432385	down
HOVUSG1207900	6.379	0.000966592	up				HOVUSG1675700	-2.603	0.00516432	down				HOVUSG1598700	1.822	2.86122e-10	up				HOVUSG1162800	1.988	0.00836313	up				HOVUSG1257200	1.052	0.0405576	up				HOVUSG1249900	-4.805	0.000714272	down
HOVUSG1208100	2.496	7.06357e-08	up				HOVUSG1682000	-3.938	0.0156566	down				HOVUSG1601100	-1.434	7.37295e-10	down				HOVUSG1166200	1.113	0.0308666	up				HOVUSG1257300	-1.127	0.00558648	down				HOVUSG1250800	-1.472	0.0409145	down
HOVUSG1209600	-6.801	0.000102082	down				HOVUSG1682200	-2.318	0.0144319	down				HOVUSG1601200	-1.161	2.67541e-07	down				HOVUSG1172500	-1.231	0.0194897	down				HOVUSG1257700	-9.108	1.01226e-09	down				HOVUSG1251400	4.62	5.33423e-29	up
HOVUSG1209900	-7.084	1.42293e-05	down				HOVUSG1684500	1.719	0.0442707	up				HOVUSG1602400	-1.266	0.000205306	down				HOVUSG1173500	-1.015	0.0260545	down				HOVUSG1260000	-6.34	0.00380189	down				HOVUSG1253700	-8.31	1.48205e-08	down
HOVUSG1210000	-6.339	0.00046353	down				HOVUSG1686000	1.207	0.0210865	up				HOVUSG1608800	1.325	0.00506081	up				HOVUSG1174500	5.781	1.63331e-06	up				HOVUSG1260300	-2.22	0.000466652	down				HOVUSG1254200	1.667	0.00169536	up
HOVUSG1211700	-4.845	1.18999e-17	down				HOVUSG1689600	7.334	4.57347e-05	up				HOVUSG1613200	-8.871	2.02811e-10	down				HOVUSG1175200	1.626	0.0431339	up				HOVUSG1260400	-1.741	9.11506e-05	down				HOVUSG1256400	4.926	7.88911e-12	up
HOVUSG1212200	1	0.00313827	up				HOVUSG1691200	-1.95	0.000930025	down				HOVUSG1613300	-10.652	3.37552e-16	down				HOVUSG1175800	-1.301	0.000142148	down				HOVUSG1260600	-7.934	7.72716e-07	down				HOVUSG1257200	1.21	0.0120135	up
HOVUSG1215100	5.818	0.00902899	up				HOVUSG1691800	-1.376	0.0424066	down				HOVUSG1616400	-1.169	6.19791e-06	down				HOVUSG1182300	2.685	4.22358e-19	up				HOVUSG1261300	-2.228	1.26522e-06	down				HOVUSG1257300	-1.044	0.00548768	down
HOVUSG1220000	6.276	0.000980467	up				HOVUSG1696800	-2.258	0.00446262	down				HOVUSG1618400	3.171	0.000233775	up				HOVUSG1182700	-1.596	7.11935e-07	down				HOVUSG1261400	1.363	0.00412863	up				HOVUSG1257700	-9.022	1.35012e-09	down
HOVUSG1224200	-1.077	0.00140229	down				HOVUSG1697700	-1.516	0.00610946	down				HOVUSG1623600	1.515	3.79004e-05	up				HOVUSG1182800	-1.393	0.000263039	down				HOVUSG1263000	-9.304	8.11896e-11	down				HOVUSG1260000	-6.255	0.00398014	down
HOVUSG1234700	2.264	0.00499698	up				HOVUSG1708300	-1.148	0.00120997	down				HOVUSG1625500	2.515	2.49256e-10	up				HOVUSG1189400	1.535	0.00237252	up				HOVUSG1266500	5.234	0.00493659	up				HOVUSG1260300	-2.025	3.53524e-06	down
HOVUSG1236200	-2.453	0.000676731	down				HOVUSG1709600	10.483	2.50368e-15	up				HOVUSG1626400	-1.122	0.0188173	down				HOVUSG1190300	2.613	3.58427e-07	up				HOVUSG1266700	-1.043	0.00133628	down				HOVUSG1260400	-1.337	0.00826614	down
HOVUSG1236300	-1.905	8.86038e-05	down				HOVUSG1710800	-1.526	0.0119791	down				HOVUSG1631100	3.513	0.000627066	up				HOVUSG1191000	2.079	0.000489509	up				HOVUSG1279700	1.222	0.000495564	up				HOVUSG1260600	-6.039	5.86484e-05	down
HOVUSG1237500	2.914	0.0380807	up				HOVUSG1711800	4.116	6.04326e-06	up				HOVUSG1632300	-5.674	0.014195	down				HOVUSG1191700	1.043	0.000183834	up				HOVUSG1280700	5.406	0.0440544	up				HOVUSG1260800	1.277	0.0220485	up
HOVUSG1238900	-1.707	0.000839978	down				HOVUSG1711900	10.526	2.21274e-15	up				HOVUSG1634400	1.507	0.00351627	up				HOVUSG1195800	-2.666	1.47904e-21	down				HOVUSG1289000	-1.785	2.48084e-05	down				HOVUSG1261300	-2.192	7.53857e-07	down
HOVUSG1239000	-3.082	7.26835e-09	down				HOVUSG1712000	-1.68	0.00487528	down				HOVUSG1637900	-1.222	0.0047533	down				HOVUSG1196000	2.428	5.56135e-09	up				HOVUSG1294600	1.474	0.0443513	up				HOVUSG1261400	1.28	0.00933083	up
HOVUSG1247000	-1.779	6.66185e-12	down				HOVUSG1712600	3.027	0.0442707	up				HOVUSG1638200	2.053	6.44114e-08	up				HOVUSG1200500	3.637	0.00853408	up				HOVUSG1298000	2.141	0.00335574	up				HOVUSG1262200	1.026	0.0440965	up
HOVUSG1249900	5.13	0.0429449	up				HOVUSG1712700	-3.112	6.64919e-10	down				HOVUSG1639200	4.348	0.0023121	up				HOVUSG1200800	-1.813	0.0159989	down				HOVUSG1303600	3.336	1.03517e-11	up				HOVUSG1262900	5.558	0.0240014	up
HOVUSG1251600	4.465	0.0268459	up				HOVUSG1717100	2.572	0.0002049	up				HOVUSG1642800	-4.933	0.00239835	down				HOVUSG1204700	-1.666	0.00947655	down				HOVUSG1305100	-1.43	0.0157465	down				HOVUSG1263000	-9.214	1.00334e-10	down
HOVUSG1255400	7.865	3.86665e-37	up				HOVUSG1717800	8.166	5.13997e-08	up				HOVUSG1647600	5.113	0.00134681	up				HOVUSG1207500	-2.839	2.11703e-10	down				HOVUSG1318200	1.254	0.0465247	up				HOVUSG1266500	4.885	0.00573435	up
HOVUSG1255700	-7.27	4.34894e-06	down				HOVUSG1717900	3.714	8.05054e-05	up				HOVUSG1648400	-1.229	5.9173e-05	down				HOVUSG1207800	6.902	0.000316696	up				HOVUSG1319700	-5.854	0.00015904	down				HOVUSG1266700	-1.848	8.72627e-06	down
HOVUSG1255900	5.365	0.0239613	up				HOVUSG1718900	2.248	0.0423418	up				HOVUSG1657200	1.431	3.34989e-06	up				HOVUSG1207900	5.493	0.00426886	up				HOVUSG1321800	2.561	0.000865577	up				HOVUSG1266900	-2.338	0.0308307	down
HOVUSG1256100	9.018	4.89259e-11	up				HOVUSG1719800	1.24	0.0166934	up				HOVUSG1659400	1.573	0.000150499	up				HOVUSG1208000	1.885	0.00144595	up				HOVUSG1322400	-11.099	2.7256e-17	down				HOVUSG1267000	-1.733	0.0462494	down
HOVUSG1257300	-1.242	0.00337743	down				HOVUSG1721200	1.826	2.11616e-07	up				HOVUSG1659900	-1.451	4.6768e-09	down				HOVUSG1208100	2.782	2.87919e-17	up				HOVUSG1322500	-7.78	1.03368e-05	down				HOVUSG1267400	-2.114	0.0406121	down
HOVUSG1257700	-5.359	0.0414425	down				HOVUSG1721300	6.187	5.18999e-05	up				HOVUSG1660800	-1.667	0.0135257	down				HOVUSG1209600	-4.185	1.13125e-07	down				HOVUSG1328600	-1.236	0.00885191	down				HOVUSG1276100	2.575	0.0234799	up
HOVUSG1260000	-6.833	3.63102e-05	down				HOVUSG1721700	4.695	5.41196e-05	up				HOVUSG1663200	-7.18	0.0003189	down				HOVUSG1209900	-6.484	0.000388151	down				HOVUSG1332000	1.468	0.0027453	up				HOVUSG1278700	1.094	0.000437068	up
HOVUSG1260100	7.749	3.99369e-07	up				HOVUSG1722900	-2.369	0.000206495	down				HOVUSG1669100	-1.359	0.0232172	down				HOVUSG1210000	-6.557	0.000237226	down				HOVUSG1335900	6.264	0.00259783	up				HOVUSG1301700	1.042	0.00784831	up
HOVUSG1260300	-3.338	2.33455e-24	down				HOVUSG1723500	1.682	0.0115164	up				HOVUSG1670600	1.209	4.41521e-05	up				HOVUSG1210500	-2.827	0.0482451	down				HOVUSG1339800	1.186	0.0346954	up				HOVUSG1301800	9.014	1.17575e-10	up
HOVUSG1260400	-1.295	3.02961e-05	down				HOVUSG1723800	-4.51	3.12666e-06	down				HOVUSG1671100	1.283	0.00242582	up				HOVUSG1211700	-4.443	5.87544e-19	down				HOVUSG1342800	1.29	0.000115581	up				HOVUSG1305100	-1.395	0.0235563	down
HOVUSG1260500	5.916	2.10283e-18	up				HOVUSG1726300	-6.789	0.00168274	down				HOVUSG1672600	-9.508	6.97787e-13	down				HOVUSG1212200	2.574	0.0442574	up				HOVUSG1343000	1.898	1.53742e-05	up				HOVUSG1305200	1.761	0.0396474	up
HOVUSG1261000	6.733	0.000102704	up				HOVUSG1726800	2.296	2.0786e-10	up				HOVUSG1674000	-1.203	1.80947e-06	down				HOVUSG1214700	-1.801	0.000113998	down				HOVUSG1355400	5.627	0.0354404	up				HOVUSG1309800	-1.38	0.00128656	down
HOVUSG1261300	-2.087	2.26349e-06	down				HOVUSG1727000	1.192	7.23144e-06	up				HOVUSG1676500	4.487	1.29824e-05	up				HOVUSG1214900	-2.195	0.000640895	down				HOVUSG1356400	-6.134	7.10227e-12	down				HOVUSG1310400	-1.248	0.000323251	down
HOVUSG1263000	-10.264	8.51643e-15	down				HOVUSG1729500	1.374	0.040027	up				HOVUSG1677000	1.791	0.019181	up				HOVUSG1217000	-1.166	1.07541e-05	down				HOVUSG1356500	-4.646	0.000433033	down				HOVUSG1312200	-1.985	0.00875693	down
HOVUSG1264200	-5.468	0.0134099	down				HOVUSG1730600	-7.771	5.5594e-05	down				HOVUSG1679500	-1.439	0.0117068	down				HOVUSG1220000	6.891	3.50071e-07	up				HOVUSG1359400	-1.563	1.20033e-09	down				HOVUSG1318200	1.51	0.000958215	up
HOVUSG1274200	-1.591	1.81863e-05	down				HOVUSG1732100	-1.549	0.00456196	down				HOVUSG1683800	2.508	1.37066e-07	up				HOVUSG1220400	5.842	6.08894e-08	up				HOVUSG1361900	-1.154	0.0468517	down				HOVUSG1323500	-1.435	7.12365e-08	down
HOVUSG1279500	1.409	0.00137966	up				HOVUSG1732300	-1.28	0.0231401	down				HOVUSG1685200	-2.519	0.0463651	down				HOVUSG1220900	9.205	3.99512e-16	up				HOVUSG1363500	6.802	0.000416532	up				HOVUSG1327700	-6.379	3.52256e-24	down
HOVUSG1279800	5.945	0.00403154	up				HOVUSG1732500	-1.337	0.0108591	down				HOVUSG1691100	1.788	0.000791935	up				HOVUSG1221000	7.529	5.05317e-05	up				HOVUSG1365300	1.66	0.0163175	up				HOVUSG1328600	-1.004	0.0314701	down
HOVUSG1280100	6.086	0.00225334	up				HOVUSG1736200	6.995	0.000272521	up				HOVUSG1691400	3.528	0.00026995	up				HOVUSG1224200	-1.554	1.58021e-10	down				HOVUSG1366100	1.614	0.0120778	up				HOVUSG1332000	1.675	0.000150059	up
HOVUSG1282500	2.758	2.39846e-12	up				HOVUSG1739100	-1.586	8.86693e-10	down				HOVUSG1691600	1.273	4.4309e-06	up				HOVUSG1224300	-2.003	1.86045e-05	down				HOVUSG1369400	2.471	0.00042544	up				HOVUSG1332900	-1.205	0.00103342	down
HOVUSG1288000	-2.366	0.00152022	down				HOVUSG1740400	-2.242	4.94722e-15	down				HOVUSG1691800	1.36	0.0182275	up				HOVUSG1226900	-1.141	0.0300479	down				HOVUSG1370400	5.837	0.010528	up				HOVUSG1333300	7.133	2.0499e-05	up
HOVUSG1289000	-1.935	0.00323571	down				HOVUSG1741500	2.177	0.00609881	up				HOVUSG1697500	-3.495	2.63279e-39	down				HOVUSG1229600	-4.907	0.000450716	down				HOVUSG1370500	-1.823	0.00131485	down				HOVUSG1343000	1.276	0.00403634	up
HOVUSG1289300	-2.054	0.0109517	down				HOVUSG1741800	-2.326	0.036526	down				HOVUSG1697700	1.815	0.0262588	up				HOVUSG1229700	1.463	0.000124564	up				HOVUSG1370900	-2.945	0.0015475	down				HOVUSG1346100	4.909	0.0459868	up
HOVUSG1292100	1.366	6.21471e-05	up				HOVUSG1742100	-1.04	0.0290272	down				HOVUSG1701100	-1.13	0.0448677	down				HOVUSG1231900	-2.404	0.0301209	down				HOVUSG1374900	-3.528	0.000537974	down				HOVUSG1351900	1.446	0.0404034	up
HOVUSG1303600	2.859	4.20278e-09	up				HOVUSG1743400	3.488	0.0134612	up				HOVUSG1707100	1.107	0.0467906	up				HOVUSG1232700	-1.095	3.01545e-10	down				HOVUSG1376100	-1.337	0.0172604	down				HOVUSG1353600	5.782	0.0161196	up
HOVUSG1305100	-1.648	3.89934e-06	down				HOVUSG1745000	2.333	0.0265207	up				HOVUSG1709600	6.83	0.000388569	up				HOVUSG1234600	-1.305	0.00691147	down				HOVUSG1377700	-1.202	0.00743286	down				HOVUSG1356800	-4.839	1.18556e-08	down
HOVUSG1313700	1.103	0.00173421	up				HOVUSG1746900	1.06	0.00193035	up				HOVUSG1711800	6.132	0.00479627	up				HOVUSG1234700	4.855	0.00556352	up				HOVUSG1380200	1.247	0.0270669	up				HOVUSG1357600	-1.252	0.047782	down
HOVUSG1316000	1.598	1.55748e-10	up				HOVUSG1749000	3.157	0.00378781	up				HOVUSG1711900	8.643	1.97619e-09	up				HOVUSG1237600	-7.979	2.0769e-09	down				HOVUSG1383000	5.913	0.0125663	up				HOVUSG1359400	-1.197	0.000364512	down
HOVUSG1319700	-6.859	3.20083e-05	down				HOVUSG1749100	1.489	0.00318678	up				HOVUSG1713300	1.167	9.11293e-06	up				HOVUSG1237800	-1.237	0.0363101	down				HOVUSG1390600	-1.701	1.38016e-07	down				HOVUSG1362400	10.508	2.24398e-15	up
HOVUSG1321800	1.333	0.000222879	up				HOVUSG1750300	-8.871	3.69997e-09	down				HOVUSG1713700	1.358	6.22141e-05	up				HOVUSG1238200	6.593	0.00265284	up				HOVUSG1394000	2.142	0.00224134	up				HOVUSG1365000	-1.615	0.0103426	down
HOVUSG1322400	-11.91	1.1431e-20	down				HOVUSG1750500	2.41	0.00988639	up				HOVUSG1714100	1.022	0.031669	up				HOVUSG1238900	-2.02	7.71179e-16	down				HOVUSG1399200	-1.028	0.0143395	down				HOVUSG1365500	1.478	2.04624e-06	up
HOVUSG1322500	-5.867	0.0425372	down				HOVUSG1750600	-1.996	0.00362979	down				HOVUSG1717000	1.148	0.000135011	up				HOVUSG1241600	-1.402	0.0228397	down				HOVUSG1409100	-2.678	0.000214138	down				HOVUSG1370400	6.453	0.0017033	up
HOVUSG1327700	3.276	0.01746	up				HOVUSG1755800	-1.386	0.0361575	down				HOVUSG1717200	-1.736	1.09865e-10	down				HOVUSG1243800	-1.018	0.000383756	down				HOVUSG1421300	-1.95	0.0167887	down				HOVUSG1370500	-2.666	0.00358491	down
HOVUSG1329300	-1.318	0.0218632	down				HOVUSG1759400	-1.042	0.000784941	down				HOVUSG1717400	-9.606	9.71505e-13	down				HOVUSG1249500	3.024	0.0168	up				HOVUSG1422000	-4.115	0.00388651	down				HOVUSG1371800	-1.369	0.0446666	down
HOVUSG1334100	1.871	3.617e-07	up				HOVUSG1763400	-5.667	0.0361057	down				HOVUSG1717600	8.236	2.62056e-08	up				HOVUSG1250800	3.389	0.000215292	up				HOVUSG1422100	-1.448	0.0176568	down				HOVUSG1371900	2.315	0.0324708	up
HOVUSG1334400	1.597	1.95622e-05	up				HOVUSG1763500	-11.609	3.78359e-19	down				HOVUSG1717900	3.083	2.59054e-05	up				HOVUSG1251900	-1.343	3.26583e-08	down				HOVUSG1425200	1.705	0.0448781	up				HOVUSG1372200	2.45	0.00500217	up
HOVUSG1335600	6.396	0.00189512	up				HOVUSG1780000	1.074	0.0170776	up				HOVUSG1718100	-1.79	4.48033e-05	down				HOVUSG1253700	-8.106	3.33146e-08	down				HOVUSG1446300	-8.138	9.92323e-08	down				HOVUSG1374900	-4.332	3.93207e-30	down
HOVUSG1335900	6.622	0.000520321	up				HOVUSG1795100	-7.463	7.35393e-06	down				HOVUSG1718500	-9.557	1.32508e-12	down				HOVUSG1256400	3.843	3.51559e-12	up				HOVUSG1448400	5.546	0.0440345	up				HOVUSG1375600	-1.305	0.000820636	down
HOVUSG1337900	-2.255	0.0077338	down				HOVUSG1795700	-10.355	5.59134e-15	down				HOVUSG1718700	-8.714	5.56686e-10	down				HOVUSG1257300	-1.649	2.30409e-08	down				HOVUSG1451900	-1.019	0.00251788	down				HOVUSG1376100	-1.252	0.0223752	down
HOVUSG1339800	1.137	0.0133942	up				HOVUSG1795800	-9.72	1.0854e-12	down				HOVUSG1718800	-4.037	4.58149e-09	down				HOVUSG1257700	-7.723	1.57725e-05	down				HOVUSG1456200	2.396	0.0151973	up				HOVUSG1377700	-1.256	0.0250618	down
HOVUSG1342200	1.774	0.0206187	up				HOVUSG1795900	-8.891	2.62883e-09	down				HOVUSG1719100	-8.959	2.73647e-201	down				HOVUSG1259100	5.73	0.0166916	up				HOVUSG1459500	1.416	0.000119164	up				HOVUSG1380200	1.264	0.0210215	up
HOVUSG1347600	-2.719	4.18931e-05	down				HOVUSG1797100	-1.663	0.00487621	down				HOVUSG1719600	5.925	0.00863603	up				HOVUSG1260000	-6.982	2.90976e-05	down				HOVUSG1462900	-3.269	0.00511036	down				HOVUSG1388600	1.181	0.0492229	up
HOVUSG1348800	-5.264	0.0355217	down				HOVUSG1797300	-1.615	0.000304287	down				HOVUSG1719700	-1.374	0.0146716	down				HOVUSG1260300	-1.667	9.8383e-06	down				HOVUSG1464300	-1.795	0.00729443	down				HOVUSG1389200	6.346	7.41141e-12	up
HOVUSG1349900	-1.114	0.00215146	down				HOVUSG1797400	1.959	1.44867e-06	up				HOVUSG1721100	2.998	6.92373e-22	up				HOVUSG1260500	2.396	2.22194e-07	up				HOVUSG1470100	2.704	0.0035866	up				HOVUSG1390200	1.782	0.00261158	up
HOVUSG1350100	3.682	7.10553e-05	up				HOVUSG1819200	-9.183	8.05716e-11	down				HOVUSG1722200	-1.412	1.38229e-07	down				HOVUSG1260600	-8.191	1.56168e-08	down				HOVUSG1471300	10.298	1.46761e-14	up				HOVUSG1391100	-2.638	0.00298611	down
HOVUSG1351700	1.69	0.00281303	up				HOVUSG1823100	6.357	0.00367339	up				HOVUSG1722800	10.138	3.84213e-14	up				HOVUSG1261300	-2.333	2.04855e-08	down				HOVUSG1473400	-2.64	0.00640952	down				HOVUSG1394000	2.634	6.53995e-05	up
HOVUSG1356400	-4.395	0.0143306	down				HOVUSG1826200	1.083	0.00340897	up				HOVUSG1722900	-1.455	0.0465681	down				HOVUSG1262500	-1.133	0.0197709	down				HOVUSG1473700	-1.188	0.0203216	down				HOVUSG1395000	-1.052	0.00832344	down
HOVUSG1359000	1.129	7.83454e-06	up				HOVUSG1826400	-6.809	0.000277494	down				HOVUSG1723000	-2.533	3.03575e-22	down				HOVUSG1263000	-8.919	3.53655e-10	down				HOVUSG1480400	2.87	1.41623e-06	up				HOVUSG1395400	1.586	0.0223721	up
HOVUSG1362000	-1.685	0.0114504	down				HOVUSG1826500	1.798	0.0250515	up				HOVUSG1725500	2.365	6.43939e-07	up				HOVUSG1266000	1.121	0.00365029	up				HOVUSG1482300	-2.316	0.0194057	down				HOVUSG1406000	2.348	0.00130541	up
HOVUSG1363500	8.055	7.0158e-08	up				HOVUSG1826900	-4.808	0.0109275	down				HOVUSG1726800	1.445	0.000521421	up				HOVUSG1266500	-3.793	3.46404e-06	down				HOVUSG1482700	1.146	0.000346794	up				HOVUSG1409100	-2.966	3.96271e-05	down
HOVUSG1369400	1.701	5.60655e-05	up				HOVUSG1830500	-1.85	0.0484797	down				HOVUSG1733900	1.015	0.000893041	up				HOVUSG1266800	-3.203	0.0377935	down				HOVUSG1482800	1.791	0.000313816	up				HOVUSG1416800	1.775	0.0409145	up
HOVUSG1371000	4.353	0.0038771	up				HOVUSG1839000	-2.1	5.34408e-09	down				HOVUSG1736200	6.093	0.00505092	up				HOVUSG1266900	2.728	0.00429836	up				HOVUSG1482900	1.651	8.3692e-05	up				HOVUSG1419900	-1.331	0.00360746	down
HOVUSG1372700	-2.381	0.00142254	down				HOVUSG1851700	-2.314	1.23327e-06	down				HOVUSG1738600	1.085	0.00057476	up				HOVUSG1267000	2.501	1.22767e-05	up				HOVUSG1486100	-2.888	0.0190782	down				HOVUSG1422100	-1.742	3.17474e-05	down
HOVUSG1373200	3.868	0.000838834	up				HOVUSG1856200	1.056	0.030324	up				HOVUSG1739100	1.008	0.0375485	up				HOVUSG1267400	2.222	0.00606237	up				HOVUSG1486600	1.026	0.00252588	up				HOVUSG1425600	-4.825	0.00945295	down
HOVUSG1377800	-5.396	0.0201024	down				HOVUSG1856500	-1.485	0.00494913	down				HOVUSG1750300	-8.484	2.59768e-09	down				HOVUSG1270200	1.472	0.00124848	up				HOVUSG1487000	6.258	0.00239047	up				HOVUSG1426100	2.085	0.0251417	up
HOVUSG1378000	-1.765	2.19646e-07	down				HOVUSG1860800	-1.217	0.0126782	down				HOVUSG1750600	-1.872	0.00440625	down				HOVUSG1274200	1.577	0.00302707	up				HOVUSG1488400	2.002	0.0298215	up				HOVUSG1428100	1.055	0.024728	up
HOVUSG1378700	1.706	0.00145014	up				HOVUSG1861600	-2.189	0.0290272	down				HOVUSG1753300	5.19	0.00243274	up				HOVUSG1274600	-1.725	0.000418445	down				HOVUSG1490200	1.615	1.72806e-05	up				HOVUSG1448400	5.865	0.0101742	up
HOVUSG1380200	-1.033	0.00143616	down				HOVUSG1862000	-1.232	0.0347658	down				HOVUSG1755800	1.607	0.000164676	up				HOVUSG1278700	1.265	4.65852e-06	up				HOVUSG1495200	-1.264	0.0062621	down				HOVUSG1450200	-2.939	0.00019502	down
HOVUSG1399100	-3.81	2.86766e-06	down				HOVUSG1869700	5.741	0.0290485	up				HOVUSG1760500	1.071	0.00276813	up				HOVUSG1279800	5.966	0.0128677	up				HOVUSG1495400	-2.953	1.43663e-13	down				HOVUSG1451900	-1.17	0.000430277	down
HOVUSG1399200	-1.492	3.31172e-05	down				HOVUSG1876100	-2.305	4.26881e-05	down				HOVUSG1763500	-1.664	6.53508e-05	down				HOVUSG1284000	-1.458	0.0316603	down				HOVUSG1495600	1.335	0.000255303	up				HOVUSG1456200	2.45	0.0379742	up
HOVUSG1399400	4.09	0.00773972	up				HOVUSG1879300	1.803	0.00386998	up				HOVUSG1764200	-1.251	7.78551e-05	down				HOVUSG1286400	-2.236	2.67616e-07	down				HOVUSG1503000	-1.679	0.00493515	down				HOVUSG1459000	-4.685	0.000107142	down
HOVUSG1405300	1.128	0.0202648	up				HOVUSG1886800	-1.596	0.0239252	down				HOVUSG1777700	-3.34	5.27738e-06	down				HOVUSG1287800	1.481	2.34021e-12	up				HOVUSG1505000	3.233	3.27505e-08	up				HOVUSG1461600	-4.194	3.9663e-08	down
HOVUSG1409100	1.322	0.0224406	up				HOVUSG1888000	-1.226	0.000222912	down				HOVUSG1783600	-13.87	1.88546e-21	down				HOVUSG1288700	1.063	7.04113e-05	up				HOVUSG1508200	3.545	2.67822e-05	up				HOVUSG1462900	-4.41	0.00096238	down
HOVUSG1412600	-6.485	0.000222159	down				HOVUSG1898200	-8.482	2.32564e-08	down				HOVUSG1787700	-9.779	2.97055e-13	down				HOVUSG1294400	-1.882	0.00301265	down				HOVUSG1519700	-1.251	0.00802981	down				HOVUSG1470100	2.177	0.0236127	up
HOVUSG1417700	-1.382	0.0253434	down				HOVUSG1898300	-2.799	0.000256836	down				HOVUSG1789400	-1.255	0.00991896	down				HOVUSG1296300	2.106	0.000946892	up				HOVUSG1521100	4.314	0.0021966	up				HOVUSG1476100	-11.109	1.91468e-17	down
HOVUSG1421300	-2.609	3.50381e-10	down				HOVUSG1898400	-2.187	7.63406e-09	down				HOVUSG1791700	1.628	1.66264e-07	up				HOVUSG1301800	8.729	4.01765e-10	up				HOVUSG1522300	3.937	0.00376383	up				HOVUSG1480400	4.062	7.85125e-11	up
HOVUSG1425700	5.52	0.0209025	up				HOVUSG1904500	3.502	0.0180255	up				HOVUSG1792600	3.556	0.00323901	up				HOVUSG1303600	2.03	0.0194358	up				HOVUSG1522800	1.757	0.0257108	up				HOVUSG1482300	-4.341	2.68132e-05	down
HOVUSG1428900	7.023	1.95182e-05	up				HOVUSG1910500	-1.869	2.25342e-08	down				HOVUSG1793400	-1.56	0.0188021	down				HOVUSG1305100	-2.248	1.97388e-06	down				HOVUSG1529800	1.244	0.000756017	up				HOVUSG1482900	1.476	0.000429456	up
HOVUSG1429000	5.517	0.0196327	up				HOVUSG1914100	-1.206	0.0094578	down				HOVUSG1795700	-9.164	2.89235e-11	down				HOVUSG1309800	1.324	1.34268e-10	up				HOVUSG1531200	2.11	0.040789	up				HOVUSG1484100	-1.338	0.00810674	down
HOVUSG1430700	1.06	8.7166e-05	up				HOVUSG1914500	5.969	0.0266995	up				HOVUSG1795800	-9.421	2.85401e-12	down				HOVUSG1312100	-2.714	0.0254048	down				HOVUSG1531300	-1.801	0.00699533	down				HOVUSG1486100	-7.602	2.24e-06	down
HOVUSG1431300	-1.483	3.01691e-05	down				HOVUSG1916700	4.325	0.0204837	up				HOVUSG1795900	-6.889	0.000131823	down				HOVUSG1312300	-1.485	0.047206	down				HOVUSG1534500	-2.775	0.00154321	down				HOVUSG1488000	1.494	0.0156494	up
HOVUSG1436100	2.737	2.4028e-05	up				HOVUSG1917000	2.958	5.11855e-06	up				HOVUSG1797000	-1.385	0.00678741	down				HOVUSG1312800	1.044	7.15924e-08	up				HOVUSG1541200	7.185	6.00445e-05	up				HOVUSG1495200	-1.536	0.0001382	down
HOVUSG1440300	1.085	0.00767392	up				HOVUSG1919600	2.345	0.0117012	up				HOVUSG1797100	-2.488	1.31937e-05	down				HOVUSG1315900	-1.101	0.00027814	down				HOVUSG1541300	7.564	5.05904e-06	up				HOVUSG1495600	1.016	0.00218763	up
HOVUSG1446300	-8.078	2.25168e-08	down				HOVUSG1925800	-9.374	1.7238e-11	down				HOVUSG1797400	1.229	6.33117e-05	up				HOVUSG1318200	2.332	1.23494e-05	up				HOVUSG1546000	-1.986	0.00191522	down				HOVUSG1497000	-5.547	0.0284424	down
HOVUSG1449500	1.928	0.00603834	up				HOVUSG1927600	1.867	0.00124261	up				HOVUSG1801600	-1.189	1.14088e-05	down				HOVUSG1323500	-1.253	2.87437e-11	down				HOVUSG1547500	1.135	0.0394094	up				HOVUSG1498100	6.409	3.06501e-16	up
HOVUSG1452300	-1.263	0.000448503	down				HOVUSG1930400	-9.758	8.317e-12	down				HOVUSG1811700	11.149	1.53307e-17	up				HOVUSG1327700	5.278	2.5736e-05	up				HOVUSG1549500	-3.6	0.00442267	down				HOVUSG1502800	8.091	5.77814e-08	up
HOVUSG1461200	-1.263	1.5799e-06	down				HOVUSG1930500	-1.714	2.55124e-05	down				HOVUSG1812500	-3.903	0.000739451	down				HOVUSG1328300	-3.551	0.0238888	down				HOVUSG1549900	1.012	0.0102966	up				HOVUSG1503000	-1.427	0.00431447	down
HOVUSG1470100	-1.859	0.00524349	down				HOVUSG1932100	-1.331	0.0250411	down				HOVUSG1815500	1.645	0.00216972	up				HOVUSG1332900	1.388	5.04194e-05	up				HOVUSG1550400	-1.713	0.00482206	down				HOVUSG1503900	-1.037	0.00463465	down
HOVUSG1471100	2.873	0.000403799	up				HOVUSG1936000	-3.292	6.96553e-10	down				HOVUSG1817800	1.338	1.5336e-11	up				HOVUSG1333200	6.654	0.00229424	up				HOVUSG1551800	-1.841	0.00547534	down				HOVUSG1508700	7.458	6.80527e-06	up
HOVUSG1471300	12.311	2.01974e-22	up				HOVUSG1939000	2.283	1.29128e-09	up				HOVUSG1819000	-2.829	1.56856e-30	down				HOVUSG1334100	2.416	4.74259e-05	up				HOVUSG1553800	6.021	2.26578e-21	up				HOVUSG1513300	3.954	0.000169462	up
HOVUSG1472700	-6.929	2.12147e-05	down				HOVUSG1942400	-4.313	0.0449591	down				HOVUSG1819200	-7.017	3.76445e-05	down				HOVUSG1339700	2.081	0.0206408	up				HOVUSG1554400	-4.451	0.0442028	down				HOVUSG1515200	3.504	0.000786646	up
HOVUSG1473400	-3.578	3.43989e-05	down				HOVUSG1945400	1.062	5.84324e-05	up				HOVUSG1820400	5.403	0.0411355	up				HOVUSG1340200	1.909	0.0150238	up				HOVUSG1556700	6.376	0.00245528	up				HOVUSG1515500	7.255	2.33001e-05	up
HOVUSG1473700	-1.923	0.0398732	down				HOVUSG1946400	9.481	1.40842e-12	up				HOVUSG1820500	5.721	0.0225479	up				HOVUSG1343500	-1.399	1.81393e-06	down				HOVUSG1557100	1.893	1.8605e-05	up				HOVUSG1517500	-2.039	0.0317638	down
HOVUSG1476000	4.303	0.0186041	up				HOVUSG1947300	-1.171	0.0126782	down				HOVUSG1821700	-2.642	1.95399e-06	down				HOVUSG1346600	-1.051	0.00879529	down				HOVUSG1558600	-1.503	3.65211e-05	down				HOVUSG1521700	-1.005	0.0439652	down
HOVUSG1476900	4.954	0.00193126	up				HOVUSG1949800	1.501	7.19886e-06	up				HOVUSG1823100	4.612	0.0148567	up				HOVUSG1351900	1.415	0.000753871	up				HOVUSG1558800	4.889	0.0479248	up				HOVUSG1522800	2.363	0.000214313	up
HOVUSG1477700	1.07	2.68827e-07	up				HOVUSG1951100	-1.619	0.000802408	down				HOVUSG1824500	1.148	0.000420214	up				HOVUSG1353200	1.003	0.000265802	up				HOVUSG1564600	2.411	0.010933	up				HOVUSG1529800	1.538	7.67283e-07	up
HOVUSG1486100	-1.571	0.00705504	down				HOVUSG1951700	-5.995	5.31786e-05	down				HOVUSG1827800	-1.215	0.028445	down				HOVUSG1356400	-1.478	0.00275625	down				HOVUSG1565500	-1.639	0.00055565	down				HOVUSG1531300	-1.499	0.0138541	down
HOVUSG1490200	2.003	7.01583e-06	up				HOVUSG1952600	-2.668	0.0010526	down				HOVUSG1836600	-1.87	0.0035816	down				HOVUSG1356500	-1.376	0.00230457	down				HOVUSG1569400	2.43	0.0190526	up				HOVUSG1541200	6.914	0.000128764	up
HOVUSG1495200	-1.952	0.00393622	down				HOVUSG1952800	-2.904	0.000416778	down				HOVUSG1844800	7.614	1.55794e-06	up				HOVUSG1356800	6.603	0.0015059	up				HOVUSG1573400	5.646	0.0210363	up				HOVUSG1541300	6.471	0.00201248	up
HOVUSG1495400	-4.393	5.57772e-27	down				HOVUSG1953800	-1.6	0.0222917	down				HOVUSG1845600	1.231	1.35756e-06	up				HOVUSG1357800	1.33	5.99782e-05	up				HOVUSG1575000	2.16	0.00332045	up				HOVUSG1545900	-1.056	0.00454265	down
HOVUSG1496400	5.93	0.00827445	up				HOVUSG1955100	1.026	0.0221825	up				HOVUSG1845700	1.219	0.000220307	up				HOVUSG1362400	9.349	6.88784e-12	up				HOVUSG1575800	2.922	0.00990283	up				HOVUSG1546000	-1.475	0.0269917	down
HOVUSG1503100	-1.201	1.69833e-06	down				HOVUSG1957200	-4.405	1.55495e-53	down				HOVUSG1848100	-1.816	0.00181179	down				HOVUSG1365500	1.13	6.42608e-07	up				HOVUSG1578800	1.282	0.0159364	up				HOVUSG1546600	5.463	0.0300192	up
HOVUSG1505000	4.733	4.29104e-38	up				HOVUSG1957900	-5.226	1.15088e-28	down				HOVUSG1859900	2.313	2.00671e-05	up				HOVUSG1369400	2.768	0.00018842	up				HOVUSG1581100	3.584	0.00548096	up				HOVUSG1550400	-1.49	0.00857107	down
HOVUSG1505400	1.252	0.000229985	up				HOVUSG1958300	-1.973	0.0379162	down				HOVUSG1861600	1.911	0.028445	up				HOVUSG1369600	3.555	2.92099e-05	up				HOVUSG1583300	1.078	0.000302453	up				HOVUSG1550500	-1.548	0.00663344	down
HOVUSG1508200	1.055	2.24573e-07	up				HOVUSG1959100	9.55	4.35263e-12	up				HOVUSG1863100	-1.132	0.0033889	down				HOVUSG1370400	7.255	1.07597e-05	up				HOVUSG1583900	1.474	0.0298435	up				HOVUSG1554400	-6.097	0.00452639	down
HOVUSG1508900	-2.886	0.00950856	down				HOVUSG1959700	-1.151	0.0149857	down				HOVUSG1866000	-1.144	0.00506081	down				HOVUSG1370500	-2.046	0.000740648	down				HOVUSG1584600	1.042	0.00503701	up				HOVUSG1554600	-3.06	0.0168286	down
HOVUSG1516500	1.145	0.00434645	up				HOVUSG1960300	-1.706	0.0392593	down				HOVUSG1868900	6.105	6.15536e-40	up				HOVUSG1371200	1.857	0.0229617	up				HOVUSG1586700	-6.518	0.00165421	down				HOVUSG1556700	6.012	0.00500558	up
HOVUSG1517300	-2.309	5.99632e-10	down				HOVUSG1967000	-1.842	6.61228e-05	down				HOVUSG1877900	-1.262	0.00120989	down				HOVUSG1371800	1.673	0.00132015	up				HOVUSG1590000	1.896	0.037259	up				HOVUSG1557000	-2.302	0.0120562	down
HOVUSG1534400	-3.137	0.0212297	down				HOVUSG1970000	1.758	0.0189015	up				HOVUSG1878300	5.9	4.1908e-05	up				HOVUSG1371900	2.97	6.09083e-05	up				HOVUSG1590200	4.507	1.07767e-11	up				HOVUSG1557100	1.252	0.023626	up
HOVUSG1534500	-3.499	2.09862e-05	down				HOVUSG1970100	2.142	0.0326934	up				HOVUSG1878500	3.793	6.47964e-07	up				HOVUSG1374900	-4.1	6.22786e-16	down				HOVUSG1595600	-2.856	0.0114755	down				HOVUSG1558600	-1.01	0.0126663	down
HOVUSG1534600	-1.436	0.03495	down				HOVUSG1972900	2.007	0.0108411	up				HOVUSG1879900	3.358	0.00166507	up				HOVUSG1375100	2.458	1.79464e-06	up				HOVUSG1601100	-1.118	0.00186971	down				HOVUSG1558800	5.577	0.00203689	up
HOVUSG1537000	-3.05	0.000173184	down				HOVUSG1975500	-1.202	0.010787	down				HOVUSG1884500	-3.372	0.0173988	down				HOVUSG1378400	1.844	0.000880721	up				HOVUSG1604400	2.207	0.0477257	up				HOVUSG1559700	1.015	0.00702877	up
HOVUSG1539500	1.115	5.13026e-06	up				HOVUSG1976600	7.979	9.1197e-11	up				HOVUSG1893600	6.18	0.00776976	up				HOVUSG1378700	-1.208	0.0115748	down				HOVUSG1606200	-1.118	0.00887199	down				HOVUSG1560100	-1.652	3.64359e-06	down
HOVUSG1539900	-1.069	0.0163286	down				HOVUSG1976700	9.136	1.44668e-10	up				HOVUSG1896200	2.972	0.00301129	up				HOVUSG1379500	-1.593	8.63028e-10	down				HOVUSG1608800	3.371	8.095e-08	up				HOVUSG1560400	-3.932	0.0223995	down
HOVUSG1541200	8.55	1.82978e-09	up				HOVUSG1976800	-2.727	5.76333e-11	down				HOVUSG1897600	3.723	0.00658314	up				HOVUSG1381600	1.022	0.00542868	up				HOVUSG1613200	-8.261	6.68024e-08	down				HOVUSG1562900	4.474	0.0260914	up
HOVUSG1549000	-1.085	1.1527e-08	down				HOVUSG1976900	4.546	0.000738411	up				HOVUSG1898000	-3.187	1.15014e-07	down				HOVUSG1386200	1.24	6.4946e-08	up				HOVUSG1613300	-10.751	1.08776e-15	down				HOVUSG1565500	-1.154	0.0210905	down
HOVUSG1549300	-1.065	0.00838186	down				HOVUSG1978000	8.548	1.13126e-08	up				HOVUSG1898300	5.552	0.0021279	up				HOVUSG1389200	6.399	6.30615e-15	up				HOVUSG1618400	7.11	4.67286e-08	up				HOVUSG1575000	1.809	0.0256583	up
HOVUSG1550400	-1.965	4.14451e-09	down				HOVUSG1979900	1.079	0.00289498	up				HOVUSG1898400	1.241	0.00730641	up				HOVUSG1389300	1.759	7.72508e-07	up				HOVUSG1619600	-1.642	0.00403797	down				HOVUSG1583300	1.04	0.00203702	up
HOVUSG1550500	-1.182	1.47752e-05	down				HOVUSG1985900	3.04	1.18739e-27	up				HOVUSG1900000	2.558	3.36504e-08	up				HOVUSG1395400	-1.497	0.0248165	down				HOVUSG1620100	1.197	0.0451602	up				HOVUSG1586700	-6.428	0.0017101	down
HOVUSG1552800	1.065	0.000104816	up				HOVUSG1986000	1.232	0.00014193	up				HOVUSG1900600	1.721	0.000193809	up				HOVUSG1399100	-1.066	0.00012101	down				HOVUSG1620500	1.215	0.0075911	up				HOVUSG1590200	4.437	4.60765e-11	up
HOVUSG1553800	5.979	1.62433e-24	up				HOVUSG1990700	3.136	1.98456e-14	up				HOVUSG1901400	1.314	0.0187186	up				HOVUSG1399200	-1.565	8.02568e-05	down				HOVUSG1623600	1.209	0.00195038	up				HOVUSG1595600	-7.078	3.92825e-05	down
HOVUSG1554800	-1.372	5.60494e-09	down				HOVUSG1991700	5.694	0.035713	up				HOVUSG1905900	-1.236	0.0100989	down				HOVUSG1409100	2.312	0.00811804	up				HOVUSG1624000	1.568	0.00818779	up				HOVUSG1596700	1.655	0.0031861	up
HOVUSG1557000	1.354	0.0341987	up				HOVUSG1991800	5.775	1.9419e-07	up				HOVUSG1919600	1.584	1.28407e-13	up				HOVUSG1410200	1.212	0.00954741	up				HOVUSG1625100	2.384	0.00954303	up				HOVUSG1597300	-2.631	3.4276e-07	down
HOVUSG1557500	-3.035	0.00935372	down				HOVUSG1993500	-1.227	0.0335234	down				HOVUSG1919800	2.21	0.00686502	up				HOVUSG1412600	-5.195	0.0377749	down				HOVUSG1625800	2.055	3.33247e-09	up				HOVUSG1604200	-2.234	0.0141166	down
HOVUSG1558000	-1.367	0.0315116	down				HOVUSG2001800	-1.609	5.75814e-06	down				HOVUSG1930400	-8.211	2.71355e-08	down				HOVUSG1425100	1.95	0.0239269	up				HOVUSG1626400	-2.057	6.10614e-05	down				HOVUSG1604400	2.605	0.000809474	up
HOVUSG1568400	-3.171	0.00662518	down				HOVUSG2002200	2.531	0.0156933	up				HOVUSG1934200	1.397	0.0341274	up				HOVUSG1425600	6.856	0.00216934	up				HOVUSG1638200	1.778	0.00109092	up				HOVUSG1606200	-1.119	0.00831897	down
HOVUSG1569400	1.822	5.65437e-12	up				HOVUSG2006500	-1.859	1.11298e-05	down				HOVUSG1936000	3.537	0.00508787	up				HOVUSG1428900	5.454	0.0309982	up				HOVUSG1639200	3.121	0.0196701	up				HOVUSG1608800	3.234	1.75513e-08	up
HOVUSG1572000	-1.613	0.0123803	down				HOVUSG2006800	8.74	1.94672e-09	up				HOVUSG1936100	1.331	0.00436015	up				HOVUSG1429700	1.222	0.000524426	up				HOVUSG1640500	-5.853	0.0172676	down				HOVUSG1609100	-1.578	0.000495167	down
HOVUSG1572300	-1.416	0.00134523	down				HOVUSG2010400	-9.664	1.40985e-12	down				HOVUSG1937400	2.201	0.0440477	up				HOVUSG1433500	-1.54	0.000653269	down				HOVUSG1648400	1.173	0.00876913	up				HOVUSG1613200	-8.172	7.23073e-08	down
HOVUSG1576800	3.059	0.00325052	up				HOVUSG2016600	-1.189	0.0103289	down				HOVUSG1938600	1.534	0.00100458	up				HOVUSG1435500	2.376	0.042456	up				HOVUSG1653400	1.223	0.0295842	up				HOVUSG1613300	-10.662	1.28893e-15	down
HOVUSG1586700	-7.793	2.6234e-07	down				HOVUSG2018200	1.047	0.0298974	up				HOVUSG1939300	3.74	5.97165e-20	up				HOVUSG1439100	-1.012	7.219e-05	down				HOVUSG1654000	2.591	0.00118013	up				HOVUSG1615200	-1.135	0.0153748	down
HOVUSG1590200	-1.836	0.0084379	down				HOVUSG2020000	1.884	0.00222247	up				HOVUSG1939700	-2.484	0.00579168	down				HOVUSG1444900	4.947	6.09083e-05	up				HOVUSG1657200	1.373	0.000115239	up				HOVUSG1619200	-3.872	4.99426e-14	down
HOVUSG1594800	-1.996	2.87755e-05	down				HOVUSG2025800	1.156	0.046927	up				HOVUSG1942400	-4.468	3.39596e-06	down				HOVUSG1450200	2.299	0.000156982	up				HOVUSG1669500	3.308	0.000703693	up				HOVUSG1619600	-1.774	0.000693203	down
HOVUSG1594900	-1.774	0.000832446	down				HOVUSG2026400	1.043	0.0280091	up				HOVUSG1945400	1.839	7.34696e-12	up				HOVUSG1450600	-1.084	0.000822946	down				HOVUSG1670700	1.574	0.0301225	up				HOVUSG1625800	1.378	0.000102715	up
HOVUSG1595600	-6.72	0.000229985	down				HOVUSG2027300	-1.544	0.0301393	down				HOVUSG1945500	1.479	2.9045e-10	up				HOVUSG1451700	-1.226	0.0319004	down				HOVUSG1672600	-10.445	5.93556e-15	down				HOVUSG1634400	-1.404	0.0261406	down
HOVUSG1599500	-1.981	1.88204e-05	down				HOVUSG2034600	-1.109	0.0414975	down				HOVUSG1947500	1.604	0.00173004	up				HOVUSG1452300	-1.065	0.0164333	down				HOVUSG1677700	1.036	7.98145e-05	up				HOVUSG1637000	2.286	0.000590445	up
HOVUSG1607700	-1.044	6.8528e-05	down				HOVUSG2035000	-1.463	0.0393688	down				HOVUSG1951400	-2.088	0.000230083	down				HOVUSG1456200	3.946	1.62355e-08	up				HOVUSG1684500	2.512	0.0159324	up				HOVUSG1638200	1.562	0.00499833	up
HOVUSG1608800	-1.203	0.00984429	down				HOVUSG2038400	-8.73	2.90366e-09	down				HOVUSG1952800	-3.441	4.49791e-05	down				HOVUSG1461600	3.57	0.0058016	up				HOVUSG1685900	-1.623	0.0375639	down				HOVUSG1638300	2.456	0.00090881	up
HOVUSG1613200	-6.481	0.000497539	down				HOVUSG2039400	-1.134	0.0297733	down				HOVUSG1953000	10.516	9.7382e-16	up				HOVUSG1470100	-2.223	0.000159031	down				HOVUSG1688500	1.134	0.0014205	up				HOVUSG1638800	3.693	0.0301126	up
HOVUSG1613300	-10.109	1.33766e-13	down				HOVUSG2041600	-1.406	0.0160244	down				HOVUSG1953100	12.195	1.32792e-21	up				HOVUSG1471100	-1.415	0.00143871	down				HOVUSG1691800	1.717	0.000879581	up				HOVUSG1639200	3.284	0.010892	up
HOVUSG1619200	1.476	0.000234447	up				HOVUSG2042500	-3.13	3.53604e-05	down				HOVUSG1957200	-4.263	1.06216e-47	down				HOVUSG1473900	-1.191	1.51734e-05	down				HOVUSG1693400	-1.362	0.000738258	down				HOVUSG1648400	1.803	1.78287e-05	up
HOVUSG1621300	2.414	0.00440369	up				HOVUSG2042600	-13.587	1.09499e-26	down				HOVUSG1957400	5.471	0.0376817	up				HOVUSG1476100	-10.917	3.60128e-17	down				HOVUSG1696800	-1.125	0.0436134	down				HOVUSG1653400	1.256	0.0271982	up
HOVUSG1623600	-1.232	0.00380107	down				HOVUSG2043200	1.4	1.0146e-07	up				HOVUSG1957900	-4.64	9.974e-21	down				HOVUSG1479600	-1.508	0.0024546	down				HOVUSG1698600	1.289	0.0251647	up				HOVUSG1669100	2.422	0.0388244	up
HOVUSG1625400	-2.45	0.0055835	down				HOVUSG2045000	-1.076	0.0174542	down				HOVUSG1960600	2.598	0.00180168	up				HOVUSG1480400	-1.924	2.60832e-07	down				HOVUSG1701000	-1.164	0.00937783	down				HOVUSG1670100	6.845	0.000157768	up
HOVUSG1631100	3.101	2.14333e-06	up				HOVUSG2048800	-9.383	9.79823e-12	down				HOVUSG1967000	1.583	0.000116597	up				HOVUSG1482300	-3.528	0.00633634	down				HOVUSG1708900	-2.044	0.0186699	down				HOVUSG1670300	-5.778	0.0220942	down
HOVUSG1632300	-6.225	0.0197082	down				HOVUSG2050400	4.161	0.0263442	up				HOVUSG1968600	2.353	0.0188986	up				HOVUSG1485700	-1.006	3.7381e-06	down				HOVUSG1709600	10.864	4.06762e-16	up				HOVUSG1672900	1.135	0.0231993	up
HOVUSG1637900	-1.829	8.6392e-05	down				HOVUSG2050500	-2.09	2.21144e-06	down				HOVUSG1968700	1.793	0.0100723	up				HOVUSG1486100	-7.682	4.85518e-07	down				HOVUSG1711900	8.078	9.00355e-08	up				HOVUSG1673600	1.467	0.000929896	up
HOVUSG1638300	-1.27	0.0198325	down				HOVUSG2053300	2.189	0.00839883	up				HOVUSG1968900	2.222	0.00022043	up				HOVUSG1494700	-1.01	0.0291301	down				HOVUSG1713800	-1.278	0.0439677	down				HOVUSG1674600	8.757	7.68803e-10	up
HOVUSG1639200	4.075	0.000288529	up				HOVUSG2053500	2.637	0.0153519	up				HOVUSG1969100	3.627	0.0100003	up				HOVUSG1495200	-1.136	0.0231317	down				HOVUSG1714000	-1.429	0.00740564	down				HOVUSG1676500	-1.945	0.00467926	down
HOVUSG1642400	1.04	1.01141e-05	up				HOVUSG2059000	-10.556	3.65149e-15	down				HOVUSG1969700	3.018	1.4385e-05	up				HOVUSG1498100	8.589	5.90778e-14	up				HOVUSG1717200	-3.143	1.45375e-10	down				HOVUSG1677100	7.458	4.02531e-06	up
HOVUSG1648400	-1.186	0.00193651	down				HOVUSG2059800	3.714	9.7028e-06	up				HOVUSG1972600	-1.079	0.00535152	down				HOVUSG1502800	8.418	3.57791e-09	up				HOVUSG1717400	-10.025	1.23049e-13	down				HOVUSG1677200	5.681	0.0152454	up
HOVUSG1648600	-1.176	6.9337e-07	down				HOVUSG2060100	-1.134	1.94125e-05	down				HOVUSG1972900	-1.629	0.00207783	down				HOVUSG1503000	-1.991	1.01111e-06	down				HOVUSG1717600	8.329	2.27317e-08	up				HOVUSG1677700	-2.725	5.98979e-19	down
HOVUSG1652000	1.513	0.0148242	up				HOVUSG2061100	1.284	2.1093e-07	up				HOVUSG1973600	-6.988	2.56746e-08	down				HOVUSG1503900	-1.303	9.79966e-06	down				HOVUSG1717900	4.858	3.01759e-09	up				HOVUSG1678100	1.531	0.0409463	up
HOVUSG1656500	1.003	0.0118478	up				HOVUSG2061300	-8.154	1.81516e-07	down				HOVUSG1974300	-1.104	0.0133017	down				HOVUSG1504500	1.393	0.00269631	up				HOVUSG1718100	-1.17	0.0200963	down				HOVUSG1678800	5.309	0.0477679	up
HOVUSG1657200	2.333	5.27562e-24	up				HOVUSG2064500	-1.908	0.000982076	down				HOVUSG1978000	6.511	0.00106018	up				HOVUSG1514800	-1.486	3.32655e-09	down				HOVUSG1718500	-9.618	4.21372e-12	down				HOVUSG1678900	3.757	0.000717034	up
HOVUSG1658800	-2.236	1.45879e-13	down				HOVUSG2067600	-8.21	4.68556e-08	down				HOVUSG1995500	7.947	5.03653e-06	up				HOVUSG1515500	6.487	0.00133599	up				HOVUSG1718700	-8.564	4.73815e-08	down				HOVUSG1679000	5.777	0.00174599	up
HOVUSG1659300	-1.579	0.0100902	down				HOVUSG2067900	-1.27	0.00453169	down				HOVUSG2000300	1.304	0.0213007	up				HOVUSG1519700	1.227	0.0470964	up				HOVUSG1718800	-4.319	3.38299e-11	down				HOVUSG1679300	3.352	2.97424e-07	up
HOVUSG1659900	1.07	0.0465758	up				HOVUSG2071800	-2.045	0.0283863	down				HOVUSG2006800	7.255	3.22432e-05	up				HOVUSG1519900	-3.479	0.000269532	down				HOVUSG1719100	-8.821	7.61372e-128	down				HOVUSG1679500	1.169	0.0177927	up
HOVUSG1660800	-1.365	0.0255115	down				HOVUSG2074400	-9.165	1.22866e-10	down				HOVUSG2007800	-1.874	0.00351506	down				HOVUSG1522800	-1.573	0.00215172	down				HOVUSG1719600	5.051	0.0231002	up				HOVUSG1682000	-6.812	0.000218421	down
HOVUSG1670900	5.365	0.0239613	up				HOVUSG2075800	1.534	0.0128247	up				HOVUSG2020000	-2.408	1.64482e-06	down				HOVUSG1525800	-1.542	0.000239441	down				HOVUSG1719700	-1.765	0.0005425	down				HOVUSG1683800	-2.23	1.76743e-05	down
HOVUSG1672300	3.778	0.00522679	up				HOVUSG2077300	-1.328	0.0010463	down				HOVUSG2023700	1.746	0.000406672	up				HOVUSG1529800	-1.183	0.00403568	down				HOVUSG1721100	2.654	6.26518e-07	up				HOVUSG1685900	-1.559	0.0114105	down
HOVUSG1672600	-9.908	9.35182e-14	down				HOVUSG2082200	1.871	0.000664565	up				HOVUSG2026100	-1.29	0.00584131	down				HOVUSG1533500	1.017	6.7519e-05	up				HOVUSG1722200	-1.486	0.00220765	down				HOVUSG1686100	-2.691	0.000559097	down
HOVUSG1676700	-1.462	0.0108273	down				HOVUSG2083600	-1.921	0.0122316	down				HOVUSG2027300	1.681	0.000120167	up				HOVUSG1534500	-1.826	0.0441265	down				HOVUSG1722800	8.5	1.0055e-09	up				HOVUSG1688500	1.186	0.00228417	up
HOVUSG1682900	1.283	8.89666e-06	up				HOVUSG2083700	-1.229	0.0279994	down				HOVUSG2029000	-1.28	0.00663146	down				HOVUSG1539900	-1.772	5.53911e-15	down				HOVUSG1723000	-2.523	1.71315e-14	down				HOVUSG1691200	2.125	0.00150291	up
HOVUSG1689300	1.48	0.00888234	up				HOVUSG2084600	-2.869	0.0117068	down				HOVUSG2029200	-7.059	1.22524e-08	down				HOVUSG1541200	3.409	0.0137733	up				HOVUSG1731400	2.784	0.000734662	up				HOVUSG1694200	5.763	0.0131458	up
HOVUSG1691600	-2.049	4.45418e-08	down				HOVUSG2085400	2.085	1.75336e-05	up				HOVUSG2034600	1.302	0.00639216	up				HOVUSG1541300	3.546	9.32184e-05	up				HOVUSG1732300	4.102	0.00652178	up				HOVUSG1697500	1.86	0.013369	up
HOVUSG1691800	-1.573	8.90553e-07	down				HOVUSG2086400	-1.107	0.00973481	down				HOVUSG2038100	-9.033	6.67821e-11	down				HOVUSG1541500	1.072	0.000118253	up				HOVUSG1732500	1.951	0.00282795	up				HOVUSG1700200	-2.902	0.00259847	down
HOVUSG1697000	1.776	7.02561e-07	up				HOVUSG2087100	-1.257	0.00677853	down				HOVUSG2038400	4.484	1.45307e-40	up				HOVUSG1541800	1.388	2.76814e-07	up				HOVUSG1736200	5.721	0.0190272	up				HOVUSG1701000	-1.533	2.16225e-05	down
HOVUSG1697500	-1.149	0.00368648	down				HOVUSG2089100	2.246	0.0167678	up				HOVUSG2039400	1.284	0.00270222	up				HOVUSG1546000	-4.4	0.000113861	down				HOVUSG1741300	-1.825	0.0162237	down				HOVUSG1701100	-1.603	0.000471412	down
HOVUSG1709600	11.069	5.99306e-18	up				HOVUSG2093500	1.787	0.00114494	up				HOVUSG2042700	-1.784	4.33609e-07	down				HOVUSG1550400	1.479	0.00695418	up				HOVUSG1746400	4.484	0.00191662	up				HOVUSG1712900	5.638	0.025713	up
HOVUSG1710800	-1.664	0.000301655	down				HOVUSG2093700	-6.065	0.00969759	down				HOVUSG2045000	-1.534	4.05492e-05	down				HOVUSG1554600	-2.62	0.0433493	down				HOVUSG1749100	1.771	2.37849e-05	up				HOVUSG1713300	1.051	0.000844621	up
HOVUSG1711700	1.189	3.96429e-11	up				HOVUSG2093800	-6.314	5.78755e-06	down				HOVUSG2047200	-2.788	0.00023066	down				HOVUSG1556700	2.915	0.0203126	up				HOVUSG1750300	-8.084	1.46835e-07	down				HOVUSG1713800	-1.659	0.00267086	down
HOVUSG1711800	3.475	0.000402983	up				HOVUSG2099700	5.119	0.0117872	up				HOVUSG2049300	-1.96	0.000972058	down				HOVUSG1557100	-1.192	0.00870659	down				HOVUSG1755800	2.109	0.00164455	up				HOVUSG1714000	-1.865	0.000428332	down
HOVUSG1711900	9.754	1.23001e-12	up				HOVUSG2099900	-1.29	0.0176252	down				HOVUSG2049700	-2.483	0.0329033	down				HOVUSG1557500	-1.099	0.00608802	down				HOVUSG1757900	-1.053	0.00758706	down				HOVUSG1717200	-1.708	5.23485e-05	down
HOVUSG1712700	-1.868	1.10778e-28	down				HOVUSG2101300	7.175	8.60928e-05	up				HOVUSG2050500	1.361	0.00109876	up				HOVUSG1558000	3.5	0.00121838	up				HOVUSG1760400	-2.569	0.000996361	down				HOVUSG1717900	3.961	0.000176393	up
HOVUSG1712900	5.384	0.0221676	up				HOVUSG2107200	-1.878	0.0215371	down				HOVUSG2050600	3.385	3.19344e-06	up				HOVUSG1559100	2.281	5.72621e-26	up				HOVUSG1763400	-6.213	0.00637733	down				HOVUSG1718500	-2.184	0.00118939	down
HOVUSG1713600	-1.936	2.53128e-31	down				HOVUSG2109700	10.077	6.27033e-14	up				HOVUSG2050700	8.776	1.21957e-09	up				HOVUSG1559200	1.681	4.2499e-09	up				HOVUSG1763500	-2.193	1.1533e-06	down				HOVUSG1718700	-6.666	5.01835e-06	down
HOVUSG1713800	-3.323	5.30507e-08	down				HOVUSG2110200	-6.685	0.0101625	down				HOVUSG2050800	1.432	6.40441e-05	up				HOVUSG1560400	-5.234	0.000943275	down				HOVUSG1770300	-1.264	0.00124424	down				HOVUSG1718800	-1.156	0.0190515	down
HOVUSG1713900	-1.969	0.00299289	down				HOVUSG2110400	1.343	0.0288986	up				HOVUSG2054900	2.839	4.45313e-15	up				HOVUSG1572000	1.875	0.000106838	up				HOVUSG1781800	5.576	4.95953e-06	up				HOVUSG1719700	-1.655	0.00404133	down
HOVUSG1714000	-3.281	2.13193e-14	down				HOVUSG2112500	3.277	0.000642941	up				HOVUSG2055800	7.252	1.3999e-05	up				HOVUSG1576800	4.295	0.020907	up				HOVUSG1783600	-14.619	2.19985e-30	down				HOVUSG1721100	2.196	1.58935e-05	up
HOVUSG1717200	-1.578	0.00663799	down				HOVUSG2113700	3.367	0.00703664	up				HOVUSG2060500	-1.721	0.0380483	down				HOVUSG1581600	1.234	0.00421651	up				HOVUSG1787100	-1.112	0.0138369	down				HOVUSG1721200	-1.251	0.00460796	down
HOVUSG1717400	-10.04	4.63825e-14	down				HOVUSG2114800	-10.556	2.91011e-15	down				HOVUSG2061100	1.161	0.000112215	up				HOVUSG1586700	-6.134	0.00253387	down				HOVUSG1787700	-10.388	1.14094e-14	down				HOVUSG1721300	-1.991	0.0477679	down
HOVUSG1717600	7.86	1.05089e-07	up				HOVUSG2116800	1.762	0.0347658	up				HOVUSG2061300	-3.817	0.045907	down				HOVUSG1594400	2.136	0.000106698	up				HOVUSG1792600	2.809	0.00235241	up				HOVUSG1723000	-2.019	6.11868e-10	down
HOVUSG1717800	5.525	0.00313019	up				HOVUSG2117100	10.627	1.86247e-15	up				HOVUSG2062500	-2.771	0.0236249	down				HOVUSG1595000	1.816	1.7838e-05	up				HOVUSG1793400	-1.683	0.0200308	down				HOVUSG1723800	-4.314	1.41242e-07	down
HOVUSG1717900	3.407	0.000341833	up				HOVUSG2117300	5.644	0.000711044	up				HOVUSG2063600	7.625	2.04305e-06	up				HOVUSG1595600	-5.471	0.00470524	down				HOVUSG1795700	-10.267	2.5179e-14	down				HOVUSG1725200	1.843	0.0493875	up
HOVUSG1718100	-3.451	0.00026931	down				HOVUSG2118600	2.333	7.10478e-05	up				HOVUSG2066000	3.234	0.000174473	up				HOVUSG1599100	1.634	1.44716e-05	up				HOVUSG1795800	-9.903	2.55535e-13	down				HOVUSG1725500	2.82	2.38136e-05	up
HOVUSG1718400	-1.148	0.00135495	down				HOVUSG2119000	-1.7	0.0215093	down				HOVUSG2067600	-5.652	0.000134994	down				HOVUSG1599500	-1.617	2.04031e-16	down				HOVUSG1795900	-6.523	0.0016779	down				HOVUSG1726800	1.26	0.00127864	up
HOVUSG1718700	-8.533	2.26868e-08	down				HOVUSG2127100	-4.288	5.99657e-08	down				HOVUSG2072100	-1.247	0.0045022	down				HOVUSG1603200	-1.266	1.04125e-07	down				HOVUSG1797000	4.633	5.64747e-06	up				HOVUSG1729300	-1.955	9.13402e-06	down
HOVUSG1719100	-7.837	2.3064e-51	down				HOVUSG2127200	-3.544	6.21335e-11	down				HOVUSG2072300	4.446	0.0376603	up				HOVUSG1607600	-1.149	0.0261719	down				HOVUSG1802200	4.461	0.0265402	up				HOVUSG1730500	-2.576	4.76576e-08	down
HOVUSG1721200	-3.631	2.97818e-07	down				HOVUSG2133000	-5.436	6.42617e-54	down				HOVUSG2073100	-1.867	0.000550092	down				HOVUSG1613000	1.129	0.000251835	up				HOVUSG1811700	5	0.00015904	up				HOVUSG1731400	1.952	0.0441046	up
HOVUSG1722200	1.137	0.0020849	up				HOVUSG2134300	-1.012	0.00305727	down				HOVUSG2074400	-6.71	2.63418e-13	down				HOVUSG1613200	-8.988	8.07197e-11	down				HOVUSG1815100	6.029	0.00642522	up				HOVUSG1733500	-3.147	0.00107295	down
HOVUSG1722500	1.232	0.0314008	up				HOVUSG2137100	2.552	0.0455931	up				HOVUSG2075800	-1.223	0.0390818	down				HOVUSG1613300	-10.768	1.06608e-16	down				HOVUSG1815500	-1.397	0.0137222	down				HOVUSG1733900	-1.296	0.00127864	down
HOVUSG1722800	8.513	1.72681e-13	up				HOVUSG2141600	1.666	0.0361057	up				HOVUSG2076900	-1.276	0.00259506	down				HOVUSG1614900	-1.338	9.37373e-11	down				HOVUSG1817900	5.104	0.00276585	up				HOVUSG1736200	6.36	0.00131048	up
HOVUSG1722900	-1.139	0.0130974	down				HOVUSG2141900	5.016	0.0245616	up				HOVUSG2079600	1.243	0.0164878	up				HOVUSG1615200	-3.611	5.96717e-12	down				HOVUSG1819000	-1.127	0.00628293	down				HOVUSG1740400	-1.391	0.00565787	down
HOVUSG1723000	-2.344	1.8044e-15	down				HOVUSG2163500	-5.882	0.0294299	down				HOVUSG2082600	-2.075	0.0318983	down				HOVUSG1616400	-1.38	1.23538e-06	down				HOVUSG1819200	-8.028	2.13222e-07	down				HOVUSG1743100	-3.859	0.044508	down
HOVUSG1725200	1.001	0.0404468	up				HOVUSG2172200	3.391	5.97694e-08	up				HOVUSG2084600	2.46	0.0378392	up				HOVUSG1619200	1.435	0.00100838	up				HOVUSG1821700	-3.042	1.95966e-08	down				HOVUSG1743200	6.302	1.02533e-06	up
HOVUSG1726400	-1.582	0.001974	down				HOVUSG2172400	6.762	8.16507e-05	up				HOVUSG2084900	-1.92	7.61615e-08	down				HOVUSG1620900	-5.044	0.00259755	down				HOVUSG1823100	7.13	7.96477e-05	up				HOVUSG1743500	4.615	6.05185e-23	up
HOVUSG1726800	2.03	1.53357e-10	up				HOVUSG2187500	-8.613	2.48052e-09	down				HOVUSG2085400	2.065	7.46989e-13	up				HOVUSG1623600	1.083	0.00430797	up				HOVUSG1823700	-1.057	0.00493659	down				HOVUSG1745000	3.171	0.00882609	up
HOVUSG1729300	-5.735	0.00563476	down				HOVUSG2200500	-6.899	0.000283423	down				HOVUSG2085500	1.732	7.45218e-13	up				HOVUSG1624000	-1.067	0.00500884	down				HOVUSG1831500	1.475	0.00677432	up				HOVUSG1745700	1.272	0.00811669	up
HOVUSG1729500	-1.118	0.0454079	down				HOVUSG2201800	-7.296	1.76378e-05	down				HOVUSG2087400	-1.165	0.0239389	down				HOVUSG1624300	-1.421	6.12785e-05	down				HOVUSG1833000	1.945	0.00446425	up				HOVUSG1747400	-1.802	5.10258e-05	down
HOVUSG1730500	3.001	6.14634e-07	up				HOVUSG2206000	-7.975	1.32228e-10	down				HOVUSG2088100	-2.068	0.000122542	down				HOVUSG1625400	-3.007	0.0235457	down				HOVUSG1837400	1.834	0.0101022	up				HOVUSG1749100	1.863	0.00013166	up
HOVUSG1731700	1.572	2.9216e-10	up				HOVUSG2209800	-3.775	0.000218224	down				HOVUSG2099900	1.051	0.0149649	up				HOVUSG1625500	2.435	5.06015e-09	up				HOVUSG1839500	-1.27	0.0141914	down				HOVUSG1750300	-6.18	1.28092e-05	down
HOVUSG1732100	-1.104	0.0174019	down				HOVUSG2217700	-8.502	4.81458e-23	down				HOVUSG2100400	-1.011	0.0152665	down				HOVUSG1626400	-1.034	0.0234179	down				HOVUSG1844800	7.492	5.08092e-06	up				HOVUSG1752900	1.515	0.00930606	up
HOVUSG1732500	-1.059	0.0116549	down				HOVUSG2227100	1.089	0.0442465	up				HOVUSG2103100	-1.083	0.000233766	down				HOVUSG1633100	1.208	0.0109895	up				HOVUSG1848100	6.209	0.0042194	up				HOVUSG1753200	-1.163	0.00275017	down
HOVUSG1736200	7.186	1.11041e-05	up				HOVUSG2233000	-10.85	1.99051e-15	down				HOVUSG2109700	6.771	0.000140459	up				HOVUSG1633800	-1.16	0.0155641	down				HOVUSG1850700	-1.698	0.0429871	down				HOVUSG1755800	2.244	0.00896055	up
HOVUSG1736800	-1.298	0.00337071	down				HOVUSG2233200	-1.517	0.000405102	down				HOVUSG2112400	4.367	0.001792	up				HOVUSG1634400	3.034	0.000784423	up				HOVUSG1857500	2.041	0.000109571	up				HOVUSG1757900	-1.033	0.0493487	down
HOVUSG1737000	6.018	0.00310628	up				HOVUSG2234400	4.439	0.0435013	up				HOVUSG2112500	3.307	1.17722e-06	up				HOVUSG1635400	-1.172	0.00273127	down				HOVUSG1860800	2.146	5.67596e-10	up				HOVUSG1760400	-1.993	0.00201324	down
HOVUSG1741300	-1.542	0.00555218	down				HOVUSG2234800	-8.596	3.92478e-09	down				HOVUSG2113300	6.629	2.86451e-22	up				HOVUSG1637900	-1.023	0.00309738	down				HOVUSG1861800	5.581	0.0370614	up				HOVUSG1762800	1.195	0.0268947	up
HOVUSG1742100	-1.142	0.00370378	down				HOVUSG2236800	2.945	4.52001e-07	up				HOVUSG2113700	7.952	1.50892e-07	up				HOVUSG1638200	2.301	1.91046e-11	up				HOVUSG1868100	1.164	0.0285566	up				HOVUSG1763400	-6.128	0.00663206	down
HOVUSG1742600	-2.143	0.0156855	down				HOVUSG2246800	-1.667	0.0452521	down				HOVUSG2115700	-1.375	3.54954e-06	down				HOVUSG1638400	-1.548	1.08888e-11	down				HOVUSG1868900	6.364	1.08748e-28	up				HOVUSG1763500	-2.495	5.32874e-14	down
HOVUSG1743400	-1.735	0.0312561	down				HOVUSG2250100	1.7	0.0231421	up				HOVUSG2116200	-7.798	6.60511e-07	down				HOVUSG1638800	3.173	2.09898e-05	up				HOVUSG1877900	-1.129	0.0461394	down				HOVUSG1770900	1.205	1.41604e-05	up
HOVUSG1743500	-2.805	0.0404125	down				HOVUSG2254900	-1.582	0.0304635	down				HOVUSG2119000	1.245	0.000436536	up				HOVUSG1639200	3.722	0.0239635	up				HOVUSG1878300	6.899	0.0013954	up				HOVUSG1773000	-4.147	1.18554e-07	down
HOVUSG1747200	2.664	0.00082513	up				HOVUSG2257500	-1.692	0.00109432	down				HOVUSG2120300	5.388	5.86242e-09	up				HOVUSG1643900	-1.352	6.7654e-07	down				HOVUSG1878500	2.884	0.000222807	up				HOVUSG1781800	4.738	0.000478216	up
HOVUSG1749100	-2.481	3.22406e-05	down				HOVUSG2266800	3.426	1.68782e-09	up				HOVUSG2120700	8.224	1.10444e-76	up				HOVUSG1648400	-1.761	8.97765e-06	down				HOVUSG1880200	4.064	0.00727986	up				HOVUSG1782000	1.655	0.0172569	up
HOVUSG1750300	-8.839	1.84298e-09	down				HOVUSG2269200	1.155	0.00716475	up				HOVUSG2121100	3.364	0.00391603	up				HOVUSG1659900	-1.124	1.38058e-07	down				HOVUSG1882500	3.514	0.00508902	up				HOVUSG1783600	-12.698	3.02108e-30	down
HOVUSG1750600	-1.916	0.000386106	down				HOVUSG2274200	-1.714	0.0153208	down				HOVUSG2131300	1.922	0.00576472	up				HOVUSG1660000	-3.04	0.0303843	down				HOVUSG1884500	-7.33	4.75675e-05	down				HOVUSG1783700	-6.576	0.000807234	down
HOVUSG1753300	3.002	5.26837e-08	up				HOVUSG2274700	-2.705	3.38476e-10	down				HOVUSG2133000	-7.08	5.36741e-22	down				HOVUSG1660800	-3.199	1.69136e-09	down				HOVUSG1888400	-1.42	0.0218943	down				HOVUSG1784400	7.202	1.27915e-16	up
HOVUSG1754500	-1.046	0.0145363	down				HOVUSG2274800	-3.875	2.59971e-06	down				HOVUSG2134300	1.056	0.0056619	up				HOVUSG1667200	-1.528	0.0415703	down				HOVUSG1890000	-1.289	0.0223453	down				HOVUSG1785200	5.674	2.25943e-10	up
HOVUSG1760000	1.767	7.6225e-09	up				HOVUSG2276900	-1.349	0.0345644	down				HOVUSG2136300	-5.233	8.29751e-09	down				HOVUSG1667900	-3.035	0.000174182	down				HOVUSG1893300	1.099	0.000759913	up				HOVUSG1785300	1.229	0.00734123	up
HOVUSG1760500	-2.306	2.19246e-09	down				HOVUSG2277000	-1.834	4.19165e-07	down				HOVUSG2138200	2.642	0.0161128	up				HOVUSG1669500	-3.109	2.10965e-05	down				HOVUSG1897600	4.789	5.51389e-06	up				HOVUSG1790700	-2.791	2.52602e-09	down
HOVUSG1763400	-5.637	0.0119174	down				HOVUSG2277200	-1.081	0.0197916	down				HOVUSG2138900	1.465	3.06967e-05	up				HOVUSG1669700	-2.01	3.39711e-07	down				HOVUSG1898200	-5.577	0.034619	down				HOVUSG1793400	-2.019	0.00273061	down
HOVUSG1763500	-1.073	0.000382294	down				HOVUSG2277500	1.631	1.08884e-07	up				HOVUSG2139500	-1.21	0.00331397	down				HOVUSG1669800	4.748	0.0128561	up				HOVUSG1898400	2.174	0.000174054	up				HOVUSG1797000	3.99	0.00707026	up
HOVUSG1769000	-1.632	2.75234e-06	down				HOVUSG2277800	2.216	0.00267001	up				HOVUSG2140800	2.243	0.0263253	up				HOVUSG1670100	7.923	1.38058e-07	up				HOVUSG1900600	2.667	1.08191e-08	up				HOVUSG1797100	-1.669	0.0189104	down
HOVUSG1770200	1.517	5.61506e-07	up				HOVUSG2278100	-1.557	4.88274e-06	down				HOVUSG2141400	1.153	7.21345e-07	up				HOVUSG1670600	1.904	1.77047e-24	up				HOVUSG1904500	-1.568	8.30354e-11	down				HOVUSG1805200	-1.045	0.0284867	down
HOVUSG1773000	-2.454	0.00120478	down				HOVUSG2278900	-1.474	0.00547959	down				HOVUSG2164000	-1.153	0.0362731	down				HOVUSG1674000	-1.108	4.4913e-05	down				HOVUSG1917500	-1.256	0.00265016	down				HOVUSG1811700	-6.012	0.0227215	down
HOVUSG1782200	1.009	3.4076e-07	up				HOVUSG2279000	-9.311	1.47601e-10	down				HOVUSG2171100	-3.992	0.000197718	down				HOVUSG1674600	6.064	2.41029e-05	up				HOVUSG1919600	1.538	0.00575226	up				HOVUSG1817100	1.588	0.0327276	up
HOVUSG1783600	3.455	0.000571549	up				HOVUSG2279100	-11.859	3.93977e-20	down				HOVUSG2176100	7.919	2.88854e-07	up				HOVUSG1676500	3.572	0.00195442	up				HOVUSG1929900	1.068	0.000540347	up				HOVUSG1817900	5.392	0.000631667	up
HOVUSG1786400	-1.331	0.00283882	down				HOVUSG2279200	-7.553	9.14986e-05	down				HOVUSG2186200	7.713	1.1159e-07	up				HOVUSG1677000	1.757	0.00253651	up				HOVUSG1930400	-5.027	0.00680889	down				HOVUSG1819200	-7.94	2.19809e-07	down
HOVUSG1787700	-8.145	1.17982e-08	down				HOVUSG2280200	1.288	0.0392767	up				HOVUSG2190400	-1.014	0.000220758	down				HOVUSG1677700	-4.837	6.25679e-93	down				HOVUSG1939000	2.543	2.55682e-05	up				HOVUSG1820400	3.617	0.0189104	up
HOVUSG1789400	-1.201	0.0208566	down				HOVUSG2282400	-2.444	0.0214527	down				HOVUSG2191500	-1.713	0.000538118	down				HOVUSG1678100	2.749	1.62199e-05	up				HOVUSG1939300	3.081	2.16542e-11	up				HOVUSG1820500	6.86	0.000139772	up
HOVUSG1792300	-1.237	0.0232429	down				HOVUSG2283100	-1.559	2.56122e-05	down				HOVUSG2191700	-1.567	0.00496626	down				HOVUSG1678600	-4.037	2.23327e-09	down				HOVUSG1942400	-6.529	4.02255e-12	down				HOVUSG1821700	-2.152	2.93286e-09	down
HOVUSG1795100	-1.497	0.0437262	down				HOVUSG2285600	-1.06	0.00171678	down				HOVUSG2192300	-5.758	0.00990612	down				HOVUSG1678800	5.219	0.0409144	up				HOVUSG1947500	-1.463	0.00109092	down				HOVUSG1823100	7.463	6.12276e-06	up
HOVUSG1795700	-10.323	1.86522e-15	down				HOVUSG2288000	-1.677	0.0398366	down				HOVUSG2192900	-1.854	0.00103906	down				HOVUSG1678900	3.766	0.00287643	up				HOVUSG1951700	-2.73	6.88718e-07	down				HOVUSG1824300	-2.437	0.000188002	down
HOVUSG1795800	-9.689	3.54539e-13	down				HOVUSG2288700	9.829	6.86051e-13	up				HOVUSG2200500	-6.127	0.00227473	down				HOVUSG1679000	8.096	2.93806e-07	up				HOVUSG1951900	-1.728	1.14796e-07	down				HOVUSG1824500	-1.161	0.00162474	down
HOVUSG1795900	-8.862	1.27897e-09	down				HOVUSG2288800	-12.085	5.29666e-21	down				HOVUSG2201800	-6.636	0.000246966	down				HOVUSG1679300	3.478	3.26608e-11	up				HOVUSG1952600	-3.028	1.10568e-05	down				HOVUSG1826900	5.53	0.0388244	up
HOVUSG1796400	1.058	0.0112335	up				HOVUSG2288900	1.899	3.86787e-08	up				HOVUSG2206000	-6.951	4.87726e-08	down				HOVUSG1680600	-5.284	0.0295465	down				HOVUSG1952800	-2.379	0.0074056	down				HOVUSG1827200	4.536	4.57835e-06	up
HOVUSG1797000	1.075	2.44476e-09	up				HOVUSG2293300	3.571	0.0278408	up				HOVUSG2208800	11.489	3.77756e-19	up				HOVUSG1682200	-1.903	0.00784159	down				HOVUSG1953000	10.227	1.74988e-14	up				HOVUSG1834300	1.731	0.0273403	up
HOVUSG1797400	1.5	8.15946e-06	up				HOVUSG2296200	-1.557	5.02129e-05	down				HOVUSG2216700	-5.43	0.000367917	down				HOVUSG1683800	2.184	0.000101713	up				HOVUSG1953100	12.106	8.16639e-21	up				HOVUSG1837400	2.183	0.000177685	up
HOVUSG1798300	-1.291	0.00277721	down				HOVUSG2302100	-7.676	7.16066e-08	down				HOVUSG2217700	-6.61	4.09804e-17	down				HOVUSG1686000	-1.265	1.07994e-06	down				HOVUSG1957200	-4.805	1.42649e-33	down				HOVUSG1839500	-1.032	0.028427	down
HOVUSG1805200	-1.565	1.84836e-17	down				HOVUSG2303200	-1.462	0.0247367	down				HOVUSG2224900	-2.767	6.7455e-11	down				HOVUSG1686100	2.617	9.69418e-07	up				HOVUSG1957900	-4.773	3.87434e-18	down				HOVUSG1847500	5.435	0.0406121	up
HOVUSG1811700	8.922	2.313e-29	up				HOVUSG2303800	12.75	4.08253e-23	up				HOVUSG2230200	-2.412	0.0192901	down				HOVUSG1687900	3.484	0.000936483	up				HOVUSG1959600	-1.88	0.0375618	down				HOVUSG1847700	2	0.0162453	up
HOVUSG1815900	1.073	8.28147e-07	up				HOVUSG2305900	-1.264	0.027736	down				HOVUSG2235400	2.102	0.0183329	up				HOVUSG1691400	2.703	0.0204704	up				HOVUSG1960600	2.057	0.0251054	up				HOVUSG1848100	6.962	0.000355039	up
HOVUSG1819200	-9.151	2.58922e-11	down				HOVUSG2307800	1.388	0.000975638	up				HOVUSG2240600	1.989	0.0395595	up				HOVUSG1691600	1.224	2.09002e-06	up				HOVUSG1960800	1.181	0.0189178	up				HOVUSG1849900	2.68	3.47911e-05	up
HOVUSG1819900	2.158	2.31679e-05	up				HOVUSG2308800	1.641	0.000126517	up				HOVUSG2252000	-11.428	5.83347e-19	down				HOVUSG1691700	2.315	0.00148996	up				HOVUSG1962200	-1.479	0.000266065	down				HOVUSG1855800	2.443	0.0191232	up
HOVUSG1822500	-1.208	5.5629e-10	down				HOVUSG2310700	6.534	0.00320899	up				HOVUSG2254100	-9.622	6.38576e-13	down				HOVUSG1691800	1.624	0.0015015	up				HOVUSG1963800	2.322	0.013887	up				HOVUSG1856000	-6.152	0.00820465	down
HOVUSG1823100	6.722	0.000175115	up				HOVUSG2311300	3.856	0.000245904	up				HOVUSG2258100	-1.536	0.0375978	down				HOVUSG1692500	-2.072	0.000248526	down				HOVUSG1963900	2.649	0.000459752	up				HOVUSG1859900	-1.206	0.0287122	down
HOVUSG1826100	1.157	0.00566548	up				HOVUSG2312700	2.391	1.1433e-05	up				HOVUSG2271600	-1.088	0.000260955	down				HOVUSG1693400	1.574	0.00115068	up				HOVUSG1965500	-1.235	0.00518613	down				HOVUSG1860800	1.731	6.97891e-06	up
HOVUSG1826400	-4.044	0.00503729	down				HOVUSG2315200	-1.49	1.06307e-07	down				HOVUSG2273000	-1.134	0.0329083	down				HOVUSG1696800	-1.838	0.00552335	down				HOVUSG1970500	2.246	0.00388651	up				HOVUSG1864000	-1.044	0.00343537	down
HOVUSG1827900	2.475	0.000747747	up				HOVUSG2316600	-7.17	0.000209376	down				HOVUSG2274400	1.976	4.42624e-05	up				HOVUSG1698400	-5.459	0.0281942	down				HOVUSG1970600	-1.075	0.0207205	down				HOVUSG1868400	-4.264	1.31171e-05	down
HOVUSG1828100	1.752	0.00486379	up				HOVUSG2317800	-6.267	0.00353354	down				HOVUSG2274600	-1.061	0.0154819	down				HOVUSG1698600	-1.532	0.000940928	down				HOVUSG1973600	-6.411	1.80993e-10	down				HOVUSG1868900	6.333	1.23716e-28	up
HOVUSG1829200	-1.867	0.00783729	down				HOVUSG2321500	-4.638	4.67779e-11	down				HOVUSG2274700	-1.96	0.000205248	down				HOVUSG1701000	-1.335	0.00297947	down				HOVUSG1974100	-1.121	0.000694986	down				HOVUSG1870400	2.556	0.0302629	up
HOVUSG1840300	1.157	0.00060644	up				HOVUSG2322200	-5.612	0.037639	down				HOVUSG2274800	-2.514	1.20712e-06	down				HOVUSG1701100	-1.68	0.00565432	down				HOVUSG1974300	-3.295	1.61762e-18	down				HOVUSG1872000	2.271	9.52476e-17	up
HOVUSG1844800	8.09	1.39517e-07	up				HOVUSG2323000	-1.58	0.0309855	down				HOVUSG2276900	1.861	0.00494638	up				HOVUSG1701600	-1.411	0.0240586	down				HOVUSG1978000	6.807	0.000166008	up				HOVUSG1874800	1.245	0.00538368	up
HOVUSG1847900	-1.485	0.000313374	down				HOVUSG2328300	-10.626	1.26489e-15	down				HOVUSG2278200	7.169	0.00049849	up				HOVUSG1703400	-2.319	0.00693838	down				HOVUSG1980700	-1.292	0.0137617	down				HOVUSG1882500	3.106	0.0394328	up
HOVUSG1849900	-1.689	0.000322302	down				HOVUSG2329800	-3.435	2.00311e-07	down				HOVUSG2281700	-1.392	0.0287345	down				HOVUSG1707300	1.073	0.000253063	up				HOVUSG1986400	2.57	0.00600914	up				HOVUSG1884500	-4.345	0.00275771	down
HOVUSG1850700	1.468	0.0118963	up				HOVUSG2337500	6.514	0.00319046	up				HOVUSG2285700	-1.239	0.00440778	down				HOVUSG1712900	6.195	0.00184538	up				HOVUSG1993300	1.913	9.29826e-07	up				HOVUSG1887400	1.192	0.0110766	up
HOVUSG1851700	-1.412	2.82144e-05	down				HOVUSG2354100	6.129	0.00834869	up				HOVUSG2286400	1.404	8.96214e-13	up				HOVUSG1713300	1.183	1.36679e-08	up				HOVUSG2001100	1.978	0.022757	up				HOVUSG1888400	-1.965	0.00229661	down
HOVUSG1852900	-1.222	7.9963e-05	down				HOVUSG2355900	8.304	8.34942e-12	up				HOVUSG2301000	2.133	0.0374515	up				HOVUSG1714000	-1.007	0.00866	down				HOVUSG2001600	2.169	0.0030783	up				HOVUSG1890000	-1.528	0.00069159	down
HOVUSG1856500	-1.318	0.00074318	down				HOVUSG2357500	-1.024	0.00320385	down				HOVUSG2303200	1.132	0.0226821	up				HOVUSG1717200	-1.132	3.70402e-07	down				HOVUSG2006800	6.977	0.000108052	up				HOVUSG1893300	1.106	3.86739e-06	up
HOVUSG1857500	1.945	2.16047e-07	up				HOVUSG2360600	-8.734	3.39325e-09	down				HOVUSG2303400	1.075	0.0181358	up				HOVUSG1718100	-1.065	4.84575e-05	down				HOVUSG2017700	-3.001	0.00298385	down				HOVUSG1895100	2.227	0.00623916	up
HOVUSG1861400	-1.995	7.39765e-06	down				HOVUSG2360700	-7.648	0.00027629	down				HOVUSG2307200	2.642	7.0979e-06	up				HOVUSG1718700	-8.831	2.13726e-10	down				HOVUSG2018600	-1.72	0.00540088	down				HOVUSG1896400	4.196	0.00953909	up
HOVUSG1863900	-1.058	0.00456359	down				HOVUSG2372000	1.217	0.0147798	up				HOVUSG2307800	-3.895	1.36053e-11	down				HOVUSG1719700	-2.025	8.2658e-05	down				HOVUSG2024900	1.936	0.000792769	up				HOVUSG1897600	5.478	9.51651e-10	up
HOVUSG1864000	-1.081	0.000668634	down				HOVUSG2373500	2.235	0.0190337	up				HOVUSG2307900	-1.055	0.00169347	down				HOVUSG1720100	-1.067	0.000653269	down				HOVUSG2026100	-1.96	3.44553e-07	down				HOVUSG1898200	-5.489	0.0335205	down
HOVUSG1868100	1.372	0.0017444	up				HOVUSG2387700	2.103	0.00122031	up				HOVUSG2309900	-3.774	4.30577e-16	down				HOVUSG1721100	2.871	7.87019e-10	up				HOVUSG2027300	1.23	0.0106662	up				HOVUSG1898400	2.069	0.000403252	up
HOVUSG1868900	6.833	4.00235e-34	up				HOVUSG2388600	-1.096	0.0186777	down				HOVUSG2310400	5.686	1.35807e-08	up				HOVUSG1721200	-1.252	0.000352013	down				HOVUSG2029000	-1.376	0.000865766	down				HOVUSG1899400	-2.275	7.66306e-12	down
HOVUSG1871100	1.717	0.00167	up				HOVUSG2410700	-1.162	0.00252158	down				HOVUSG2311800	-2.39	1.04065e-06	down				HOVUSG1722900	-1.133	0.0150061	down				HOVUSG2029200	-8.822	8.84229e-10	down				HOVUSG1900600	1.607	0.00361314	up
HOVUSG1877200	-1	8.21734e-08	down				HOVUSG2425000	1.777	3.94395e-06	up				HOVUSG2312700	2.352	1.20626e-14	up				HOVUSG1723000	-2.245	2.0589e-16	down				HOVUSG2032800	3.26	0.0480569	up				HOVUSG1901400	1.725	0.0254511	up
HOVUSG1877400	1.011	0.0362455	up				HOVUSG2431800	-1.85	3.54342e-05	down				HOVUSG2315200	-2.666	9.89901e-14	down				HOVUSG1725500	2.582	9.74508e-07	up				HOVUSG2034600	1.477	0.000807464	up				HOVUSG1904200	2.774	4.24677e-09	up
HOVUSG1878300	8.3	6.15902e-09	up				HOVUSG2437900	-8.887	3.75774e-10	down				HOVUSG2316600	-5.954	0.00559127	down				HOVUSG1725600	1.023	3.24421e-05	up				HOVUSG2034700	1.693	0.038741	up				HOVUSG1904300	4.646	0.0132911	up
HOVUSG1879300	-1.646	5.3416e-05	down				HOVUSG2438700	-2.398	0.000293958	down				HOVUSG2316900	4.708	0.000462836	up				HOVUSG1726700	-6.891	0.000113602	down				HOVUSG2036400	-2.507	0.00716076	down				HOVUSG1910200	-2.277	0.000326464	down
HOVUSG1879900	2.439	0.00128242	up				HOVUSG2438800	-1.435	8.46038e-06	down				HOVUSG2317800	-5.734	0.0213526	down				HOVUSG1726800	1.763	1.38656e-06	up				HOVUSG2038100	-6.431	4.13651e-16	down				HOVUSG1911100	-1.274	0.000501879	down
HOVUSG1882200	-1.5	3.2612e-08	down				HOVUSG2442800	-1.184	0.0197677	down				HOVUSG2319000	5.827	0.0222816	up				HOVUSG1730500	1.343	0.0264232	up				HOVUSG2038400	2.533	7.98894e-15	up				HOVUSG1927500	1.013	0.0486564	up
HOVUSG1883300	-7.266	4.98971e-06	down				HOVUSG2443500	1.669	0.0253612	up				HOVUSG2319900	1.615	5.1005e-05	up				HOVUSG1736200	5.734	0.0172724	up				HOVUSG2039400	1.468	0.000242081	up				HOVUSG1928800	5.831	0.0113906	up
HOVUSG1884500	-3.264	6.80862e-09	down				HOVUSG2444900	8.087	0.00452756	up				HOVUSG2323000	-1.977	2.23517e-05	down				HOVUSG1737000	5.465	0.0314601	up				HOVUSG2041100	-6.533	0.00444159	down				HOVUSG1929900	1.044	4.83147e-05	up
HOVUSG1888000	-1.77	4.06522e-08	down				HOVUSG2458300	-2.641	0.0151226	down				HOVUSG2324800	-1.21	1.03004e-09	down				HOVUSG1739300	1.804	0.046389	up				HOVUSG2042100	-1.699	0.0332715	down				HOVUSG1930400	-6.864	0.000290504	down
HOVUSG1889400	1.35	0.00147722	up				HOVUSG2460000	-2.52	0.0121488	down				HOVUSG2325100	-1.437	0.00116605	down				HOVUSG1740400	-2.321	3.198e-11	down				HOVUSG2042500	-1.085	0.0490412	down				HOVUSG1934200	-1.439	0.00318217	down
HOVUSG1890600	1.612	1.62358e-07	up				HOVUSG2461300	-1.128	0.0399876	down				HOVUSG2326900	-2.283	0.000573056	down				HOVUSG1742900	-4.634	0.0170297	down				HOVUSG2050500	1.571	0.000762206	up				HOVUSG1937700	-1.83	0.0481202	down
HOVUSG1896100	-1.065	0.000779551	down				HOVUSG2462500	-9.265	6.97592e-11	down				HOVUSG2328300	-9.236	1.21191e-11	down				HOVUSG1743400	-1.06	8.72948e-06	down				HOVUSG2050600	8.607	3.21165e-09	up				HOVUSG1938600	-1.172	0.037645	down
HOVUSG1896700	1.012	0.000195713	up				HOVUSG2463100	5.905	0.0216595	up				HOVUSG2334000	6.23	0.0107441	up				HOVUSG1745000	3.25	6.08909e-14	up				HOVUSG2050700	8.065	2.22791e-07	up				HOVUSG1938800	-1.156	0.00880325	down
HOVUSG1897900	-1.402	1.50076e-05	down				HOVUSG2463200	6.886	0.000620759	up				HOVUSG2336300	-2.343	0.00445523	down				HOVUSG1745700	1.528	2.48218e-11	up				HOVUSG2053300	-1.237	0.0203076	down				HOVUSG1939000	2.752	6.02732e-07	up
HOVUSG1898000	-1.608	0.000349192	down				HOVUSG2464100	-8.79	9.95187e-10	down				HOVUSG2337700	-1.826	0.000357407	down				HOVUSG1750300	-8.601	9.72221e-10	down				HOVUSG2054900	1.788	0.000439789	up				HOVUSG1939300	2.025	0.00673845	up
HOVUSG1898200	-8.451	8.35473e-09	down				HOVUSG2465000	-6.751	8.48113e-10	down				HOVUSG2339800	1.546	1.43779e-05	up				HOVUSG1750600	-1.392	0.00958838	down				HOVUSG2055800	6.064	5.45909e-05	up				HOVUSG1942100	-5.55	0.0283377	down
HOVUSG1898400	-1.476	0.000334392	down				HOVUSG2466900	-8.513	8.93155e-09	down				HOVUSG2340400	-5.98	0.00552898	down				HOVUSG1751100	-2.006	0.00103565	down				HOVUSG2060500	-2.389	0.0214224	down				HOVUSG1942400	-9.276	2.35686e-11	down
HOVUSG1904500	-1.399	0.0470439	down				HOVUSG2475500	-3.609	4.03648e-16	down				HOVUSG2348000	-3.523	0.0130686	down				HOVUSG1760000	-1.776	0.0130865	down				HOVUSG2061300	-8.04	3.01567e-07	down				HOVUSG1944400	-1.768	0.00282926	down
HOVUSG1907400	1.125	0.00350189	up				HOVUSG2477200	-1.872	0.00285018	down				HOVUSG2352300	-1.898	0.0162164	down				HOVUSG1760400	-6.431	0.0055982	down				HOVUSG2062300	2.163	4.28924e-05	up				HOVUSG1951400	-1.522	0.0158429	down
HOVUSG1912600	-1.738	2.18927e-20	down				HOVUSG2478900	2.412	0.00374896	up				HOVUSG2355900	6.568	6.7286e-13	up				HOVUSG1763400	-5.288	0.0312621	down				HOVUSG2063600	7.15	4.0225e-05	up				HOVUSG1951700	-1.775	0.00121874	down
HOVUSG1916700	4.743	0.0021751	up				HOVUSG2481700	3.399	0.00114673	up				HOVUSG2356800	1.411	1.62912e-06	up				HOVUSG1763500	-1.731	5.41385e-07	down				HOVUSG2066500	5.718	1.58017e-07	up				HOVUSG1952600	-1.826	0.0017194	down
HOVUSG1926000	1.614	0.00109039	up				HOVUSG2487200	-12.857	6.68727e-24	down				HOVUSG2358600	4.046	3.42851e-06	up				HOVUSG1764200	-1.116	0.00500884	down				HOVUSG2067600	-7.562	3.94833e-06	down				HOVUSG1952800	-3.566	3.96271e-05	down
HOVUSG1930400	-9.727	4.94194e-12	down				HOVUSG2491400	-1.412	0.039915	down				HOVUSG2364300	12.661	1.88993e-23	up				HOVUSG1770300	-1.04	0.00945098	down				HOVUSG2069100	1.036	0.00540088	up				HOVUSG1961900	-1.256	7.34682e-05	down
HOVUSG1930500	-2.352	4.50328e-15	down				HOVUSG2492900	-1.756	0.000729775	down				HOVUSG2364400	10.728	2.86695e-22	up				HOVUSG1773100	-1.365	8.83839e-06	down				HOVUSG2070600	-1.637	0.0284362	down				HOVUSG1962200	-2.304	1.52681e-11	down
HOVUSG1932800	-1.216	0.0208566	down				HOVUSG2496700	2.39	0.000101706	up				HOVUSG2365000	1.201	0.0166415	up				HOVUSG1780000	1.51	3.8723e-11	up				HOVUSG2070700	-1.96	0.00026275	down				HOVUSG1963900	2.2	0.0150107	up
HOVUSG1933200	-2.335	4.22551e-10	down				HOVUSG2502400	-4.711	0.000823776	down				HOVUSG2369800	-1.925	0.0212257	down				HOVUSG1781800	-1.829	0.00424555	down				HOVUSG2071800	1.288	0.0473149	up				HOVUSG1965500	-1.134	0.0117647	down
HOVUSG1936000	-2.314	5.65331e-07	down				HOVUSG2505400	9.841	2.94884e-41	up				HOVUSG2371700	-1.386	0.00526308	down				HOVUSG1782000	2.348	2.98948e-08	up				HOVUSG2072300	5.629	0.00227408	up				HOVUSG1970500	2.272	0.00526483	up
HOVUSG1938200	1.554	1.3654e-10	up				HOVUSG2506600	7.102	0.000156549	up				HOVUSG2384800	-4.064	0.0107289	down				HOVUSG1782900	2.416	2.07604e-06	up				HOVUSG2073100	-1.97	6.2706e-05	down				HOVUSG1974300	-1.076	0.00128089	down
HOVUSG1938600	2.627	4.88361e-05	up				HOVUSG2507100	5.164	1.10769e-07	up				HOVUSG2385000	1.783	0.0113182	up				HOVUSG1783600	-13.989	9.98643e-22	down				HOVUSG2074400	-6.25	0.00278989	down				HOVUSG1978000	6.753	0.000248017	up
HOVUSG1939000	1.008	0.00242253	up				HOVUSG2511600	-1.611	0.00658281	down				HOVUSG2386400	-1.703	0.00254905	down				HOVUSG1785100	3.65	4.61627e-05	up				HOVUSG2076700	1.221	0.000396965	up				HOVUSG1980700	-1.308	0.000409167	down
HOVUSG1939300	1.523	1.54167e-12	up				HOVUSG2514200	2.073	0.00927683	up				HOVUSG2387800	2.202	1.62322e-05	up				HOVUSG1785900	-1.536	7.61492e-06	down				HOVUSG2082400	5.484	0.0350892	up				HOVUSG1986400	2.008	0.0372263	up
HOVUSG1941700	-2.68	1.87128e-11	down				HOVUSG2521500	-9.442	9.45697e-12	down				HOVUSG2389100	1.134	0.0178815	up				HOVUSG1786100	-1.099	0.0359647	down				HOVUSG2082500	1.681	0.010913	up				HOVUSG1988100	3.207	0.00429	up
HOVUSG1942400	-5.595	0.00496293	down				HOVUSG2524200	8.908	1.5295e-10	up				HOVUSG2391800	-1.217	0.00975036	down				HOVUSG1788700	-1.386	6.35655e-07	down				HOVUSG2084400	-1.477	0.0298016	down				HOVUSG1988900	1.408	0.000232486	up
HOVUSG1949900	1.775	0.000655601	up				HOVUSG2524300	9.07	4.56915e-10	up				HOVUSG2395700	1.346	0.00046532	up				HOVUSG1789400	-1.589	0.000700802	down				HOVUSG2084900	-1.664	0.0161021	down				HOVUSG1992200	-2.622	0.0228577	down
HOVUSG1951400	-1.218	0.0313038	down				HOVUSG2524800	1.84	5.17615e-08	up				HOVUSG2397600	1.327	2.98184e-05	up				HOVUSG1790700	-1.126	0.0360492	down				HOVUSG2085400	1.652	8.31625e-06	up				HOVUSG1993300	1.665	5.86484e-05	up
HOVUSG1951700	-3.251	2.66929e-05	down				HOVUSG2525000	-2.221	0.0113307	down				HOVUSG2403300	-1.177	0.00965269	down				HOVUSG1791700	1.402	2.04277e-07	up				HOVUSG2085500	1.115	0.00673111	up				HOVUSG1997300	-1.437	0.000119395	down
HOVUSG1952800	-1.769	0.0171203	down				HOVUSG2532300	-7.589	5.65579e-06	down				HOVUSG2408100	-1.693	0.00985454	down				HOVUSG1792300	-1.757	1.95832e-17	down				HOVUSG2087800	3.45	2.86746e-13	up				HOVUSG2001100	2.623	8.46076e-05	up
HOVUSG1952900	-2.604	6.64694e-23	down				HOVUSG2532500	1.004	0.0189642	up				HOVUSG2411700	1.262	0.000197713	up				HOVUSG1792600	3.822	1.47653e-05	up				HOVUSG2089700	1.154	0.00962931	up				HOVUSG2001400	1.276	0.00641537	up
HOVUSG1953000	9.601	5.17558e-13	up				HOVUSG2534900	-8.975	2.36792e-10	down				HOVUSG2431100	-7.918	1.05919e-07	down				HOVUSG1797100	-2.102	4.25279e-05	down				HOVUSG2096600	2.147	0.0120469	up				HOVUSG2001600	1.764	0.0433899	up
HOVUSG1953100	9.865	2.84669e-18	up				HOVUSG2535100	3.309	9.62358e-14	up				HOVUSG2431800	2.638	0.0448664	up				HOVUSG1797400	1.061	0.000691523	up				HOVUSG2099700	-1.176	0.0241712	down				HOVUSG2002500	-2.702	0.0125143	down
HOVUSG1954400	-2.018	0.000292298	down				HOVUSG2535200	6.322	9.8388e-26	up				HOVUSG2438700	-2.093	3.64329e-05	down				HOVUSG1811700	5.955	0.0394618	up				HOVUSG2100400	-1.415	2.12555e-05	down				HOVUSG2006800	6.922	8.30535e-05	up
HOVUSG1957200	-3.95	1.98646e-67	down				HOVUSG2535300	3.64	1.21283e-12	up				HOVUSG2438800	-1.368	0.000457217	down				HOVUSG1812500	2.375	1.24539e-06	up				HOVUSG2105100	1.131	0.00366048	up				HOVUSG2017700	-9.166	2.19567e-09	down
HOVUSG1957900	-4.772	1.44541e-40	down				HOVUSG2536400	-2.496	0.0163894	down				HOVUSG2446200	-1.085	0.000205802	down				HOVUSG1812800	3.848	0.0104453	up				HOVUSG2109700	10.429	5.49719e-15	up				HOVUSG2024800	-1.414	0.0178773	down
HOVUSG1958300	-1.734	0.0197082	down				HOVUSG2539200	4.839	9.78289e-05	up				HOVUSG2453900	1.452	0.00741512	up				HOVUSG1815500	1.235	0.0191096	up				HOVUSG2110600	6.455	0.0267444	up				HOVUSG2026100	-2.694	1.89263e-14	down
HOVUSG1959100	6.437	0.000832214	up				HOVUSG2539600	2.576	4.17993e-18	up				HOVUSG2456700	1.991	0.0318562	up				HOVUSG1819000	-2.949	1.45537e-20	down				HOVUSG2111300	-1.557	0.0237185	down				HOVUSG2036400	-2.279	0.0319916	down
HOVUSG1973500	2.432	0.00629575	up				HOVUSG2540600	1.158	0.000108243	up				HOVUSG2460000	2.747	0.000186256	up				HOVUSG1819200	-7.131	1.61778e-05	down				HOVUSG2112400	2.742	0.0447519	up				HOVUSG2037300	1.138	3.36255e-05	up
HOVUSG1974300	-3.846	0.00680961	down				HOVUSG2553900	2.56	4.28713e-11	up				HOVUSG2462200	1.147	0.0423328	up				HOVUSG1821700	-2.751	1.34758e-08	down				HOVUSG2112500	3.457	8.07448e-08	up				HOVUSG2038100	-9.747	6.50754e-13	down
HOVUSG1975500	-1.023	0.0145841	down				HOVUSG2557900	-8.411	2.48882e-08	down				HOVUSG2463100	7.72	1.36736e-06	up				HOVUSG1823200	-2.186	2.06281e-11	down				HOVUSG2112800	-1.439	0.00401644	down				HOVUSG2038400	2.808	8.41022e-21	up
HOVUSG1976000	2.988	0.00966594	up				HOVUSG2558100	-8.692	1.44538e-09	down				HOVUSG2463900	1.575	0.0269073	up				HOVUSG1823500	-2.361	6.07651e-12	down				HOVUSG2113300	10.019	1.73696e-13	up				HOVUSG2039400	1.028	0.0409923	up
HOVUSG1978000	7.66	4.14248e-07	up				HOVUSG2558200	-8.085	2.72216e-07	down				HOVUSG2464100	-7.17	1.73927e-06	down				HOVUSG1823700	-1.886	5.11828e-10	down				HOVUSG2113700	7.226	5.20023e-05	up				HOVUSG2041600	-1.574	0.00149605	down
HOVUSG1987700	-1.148	0.00950856	down				HOVUSG2567100	-9.75	3.60738e-11	down				HOVUSG2466900	-8.64	1.12227e-09	down				HOVUSG1824300	1.525	0.0270561	up				HOVUSG2115300	1.918	0.0410461	up				HOVUSG2042500	-2.874	1.1311e-08	down
HOVUSG1997300	1.012	0.00585368	up				HOVUSG2570500	12.483	1.94942e-22	up				HOVUSG2472800	-1.45	3.27853e-11	down				HOVUSG1824500	1.244	6.80514e-09	up				HOVUSG2115700	3.89	1.33139e-13	up				HOVUSG2042600	-13.141	7.32513e-25	down
HOVUSG1998300	1.148	0.00726711	up				HOVUSG2570700	3.001	0.0350283	up				HOVUSG2475000	-5.934	3.85436e-06	down				HOVUSG1826100	-1.27	0.0180356	down				HOVUSG2116200	-7.241	2.56643e-05	down				HOVUSG2043200	1.629	4.25727e-09	up
HOVUSG2006500	-1.175	0.0011208	down				HOVUSG2573600	2.557	0.0279994	up				HOVUSG2475500	2.965	1.80834e-05	up				HOVUSG1827800	-1.27	0.0165344	down				HOVUSG2116900	-3.615	0.0112643	down				HOVUSG2045000	1.509	0.000201067	up
HOVUSG2006800	6.997	2.16828e-05	up				HOVUSG2574200	-7.794	2.65594e-06	down				HOVUSG2476300	5.877	0.00145076	up				HOVUSG1828600	-2.141	0.00448853	down				HOVUSG2120300	7.154	3.06016e-06	up				HOVUSG2047200	2.995	0.00030528	up
HOVUSG2007800	-4.594	0.0250221	down				HOVUSG2574300	-7.792	8.78675e-07	down				HOVUSG2477200	1.559	0.000447278	up				HOVUSG1835700	-1.166	0.00348433	down				HOVUSG2120700	12.821	2.05025e-13	up				HOVUSG2053300	-1.265	0.00641537	down
HOVUSG2010400	-9.633	4.36588e-13	down				HOVUSG2578300	-4.952	3.73788e-26	down				HOVUSG2477700	1.228	0.00464524	up				HOVUSG1836500	1.085	0.000764355	up				HOVUSG2121100	5.544	0.000659328	up				HOVUSG2057100	-1.425	0.00302601	down
HOVUSG2016100	2.55	0.0299756	up				HOVUSG2581000	-8.568	8.45946e-09	down				HOVUSG2479500	2.135	2.02615e-07	up				HOVUSG1836600	-2.432	0.0223929	down				HOVUSG2132300	2.149	0.00105551	up				HOVUSG2060400	1.823	0.041879	up
HOVUSG2016600	-1.442	2.00626e-07	down				HOVUSG2586200	-1.674	4.14242e-08	down				HOVUSG2480400	-1.812	4.39633e-05	down				HOVUSG1837400	1.511	0.0214377	up				HOVUSG2135000	-6.14	0.0136133	down				HOVUSG2061600	1.082	0.0220834	up
HOVUSG2022000	-4.929	0.0376587	down				HOVUSG2587700	-1.802	0.000931489	down				HOVUSG2484900	3.353	1.6199e-19	up				HOVUSG1846900	-1.812	0.0297707	down				HOVUSG2136300	-6.896	1.49632e-07	down				HOVUSG2061700	-1.353	0.00509486	down
HOVUSG2023500	3.823	0.00645674	up				HOVUSG2588400	1.732	5.1006e-07	up				HOVUSG2487200	-11.38	8.98725e-19	down				HOVUSG1856200	-1.695	2.20792e-21	down				HOVUSG2138100	1.205	0.0336058	up				HOVUSG2062300	1.674	0.000252045	up
HOVUSG2025800	-1.08	0.0318565	down				HOVUSG2588500	1.351	0.00841058	up				HOVUSG2492400	1.566	0.00158681	up				HOVUSG1859900	3.275	3.83152e-06	up				HOVUSG2138400	-4.753	0.0165414	down				HOVUSG2064500	1.521	0.028782	up
HOVUSG2029200	-7.273	5.11052e-07	down				HOVUSG2588800	4.743	0.000386526	up				HOVUSG2496700	-1.437	0.0063039	down				HOVUSG1862400	-1.237	0.00188904	down				HOVUSG2140800	2.665	0.0404408	up				HOVUSG2066000	-1.683	0.00296994	down
HOVUSG2032000	-1.174	0.00493373	down				HOVUSG2592400	-1.188	0.00661097	down				HOVUSG2501600	3.622	3.00721e-08	up				HOVUSG1862700	-2.625	0.0132226	down				HOVUSG2142600	2.786	5.16855e-07	up				HOVUSG2067600	-7.474	4.00306e-06	down
HOVUSG2033400	1.127	0.00120377	up				HOVUSG2598300	-1.591	0.00326168	down				HOVUSG2505400	-5.227	0.0373944	down				HOVUSG1863600	4.179	0.00136114	up				HOVUSG2143300	1.702	3.22384e-06	up				HOVUSG2070600	-2.299	9.88961e-08	down
HOVUSG2034600	-1.065	0.00420529	down				HOVUSG2598900	-1.478	0.00559024	down				HOVUSG2505700	-1.242	0.00013551	down				HOVUSG1866000	-2.099	2.37873e-05	down				HOVUSG2143900	1.695	0.00280435	up				HOVUSG2070700	-3.398	8.66895e-12	down
HOVUSG2037800	7.524	1.16662e-06	up				HOVUSG2607700	1.485	7.19886e-06	up				HOVUSG2509700	2.38	0.0149403	up				HOVUSG1868900	5.521	7.29282e-31	up				HOVUSG2153400	7.088	4.03371e-05	up				HOVUSG2072300	5.8	7.80036e-05	up
HOVUSG2038100	-9.576	2.89926e-12	down				HOVUSG2611800	5.757	0.000241846	up				HOVUSG2510600	6.254	0.00454424	up				HOVUSG1872000	2.052	1.53958e-34	up				HOVUSG2171100	-3.974	1.70723e-05	down				HOVUSG2072400	-2.473	0.00942805	down
HOVUSG2038400	2.391	1.16422e-10	up				HOVUSG2622800	2.364	1.41385e-16	up				HOVUSG2511600	1.734	0.00289184	up				HOVUSG1874800	1.052	0.00493543	up				HOVUSG2171600	-1.043	0.00746572	down				HOVUSG2073000	-1.502	0.000858528	down
HOVUSG2038600	1.351	1.3654e-10	up				HOVUSG2624600	1.87	0.0176768	up				HOVUSG2515900	-7.978	1.52954e-07	down				HOVUSG1879900	2.953	0.0485621	up				HOVUSG2176100	7.345	9.99851e-06	up				HOVUSG2073100	-2.667	1.1338e-20	down
HOVUSG2039800	-3.076	0.024865	down				HOVUSG2627200	-3.211	0.030243	down				HOVUSG2530600	-1.766	0.000589448	down				HOVUSG1883500	1.49	0.0375953	up				HOVUSG2177900	-1.239	0.0125953	down				HOVUSG2073900	-1.326	0.0151698	down
HOVUSG2047800	1.208	0.0473688	up				HOVUSG2633300	-10.699	3.98362e-16	down				HOVUSG2531400	-2.399	5.44671e-07	down				HOVUSG1893000	-2.853	0.0480017	down				HOVUSG2186200	6.402	2.17122e-06	up				HOVUSG2074400	-6.303	0.00186843	down
HOVUSG2048600	-1.602	0.00928981	down				HOVUSG2633800	-1.586	0.000570344	down				HOVUSG2534900	-8.078	4.51814e-08	down				HOVUSG1896200	3.243	0.0016123	up				HOVUSG2191700	-1.125	0.0338334	down				HOVUSG2074700	1.23	0.023658	up
HOVUSG2050400	6.655	6.31016e-14	up				HOVUSG2634700	3.12	5.31894e-07	up				HOVUSG2535100	2.266	0.0187186	up				HOVUSG1897600	3.673	0.00330273	up				HOVUSG2192900	-1.21	0.0265658	down				HOVUSG2075800	2.058	0.000228671	up
HOVUSG2050500	-1.034	5.93433e-05	down				HOVUSG2636100	-1.497	0.0383714	down				HOVUSG2535200	4.469	6.29764e-11	up				HOVUSG1898000	-3.417	8.32341e-09	down				HOVUSG2193400	-6.725	0.000408542	down				HOVUSG2078800	-1.029	0.00874718	down
HOVUSG2050600	2.747	0.000354092	up				HOVUSG2641300	8.517	2.088e-09	up				HOVUSG2535300	2.367	3.74134e-05	up				HOVUSG1898300	6.25	0.000363216	up				HOVUSG2196500	-2.285	0.00469194	down				HOVUSG2079600	-1.177	0.0136069	down
HOVUSG2050700	8.028	4.85907e-12	up				HOVUSG2668000	1.22	0.0196865	up				HOVUSG2535700	4.409	0.0429722	up				HOVUSG1899400	-1.946	7.64978e-07	down				HOVUSG2197500	-1.56	0.00235241	down				HOVUSG2083700	1.174	0.0204545	up
HOVUSG2057100	-1.058	0.0134652	down				HOVUSG2669900	-1.225	0.049776	down				HOVUSG2536400	-2.794	0.00189429	down				HOVUSG1900000	3.732	2.23877e-25	up				HOVUSG2198900	5.459	0.0404456	up				HOVUSG2087800	2.549	2.29833e-07	up
HOVUSG2058000	4.672	0.0287704	up				HOVUSG2691200	-2.127	0.026969	down				HOVUSG2536500	-1.859	5.54954e-08	down				HOVUSG1901200	-3.818	0.00144484	down				HOVUSG2200500	-5.853	0.0159428	down				HOVUSG2088600	-1.236	0.0118922	down
HOVUSG2059800	2.25	0.024865	up				HOVUSG2693900	-5.81	0.026848	down				HOVUSG2540600	1.207	0.0185696	up				HOVUSG1909500	1.728	0.0100668	up				HOVUSG2201700	5.626	0.0245612	up				HOVUSG2089700	1.145	0.00173612	up
HOVUSG2060500	-2.799	6.11746e-10	down				HOVUSG2697600	-1.222	0.00174638	down				HOVUSG2544100	1.842	0.00964535	up				HOVUSG1919200	-5.737	0.0263229	down				HOVUSG2206000	-6.774	5.66285e-07	down				HOVUSG2091300	1.179	0.00784831	up
HOVUSG2061300	-3.558	0.0106179	down				HOVUSG2703200	-1.368	0.0299501	down				HOVUSG2553900	2.474	5.48538e-12	up				HOVUSG1930400	-6.473	1.18984e-06	down				HOVUSG2207700	1.135	0.00742577	up				HOVUSG2091500	-3.32	0.0118922	down
HOVUSG2067600	-5.79	1.16193e-07	down				HOVUSG2716500	-1.47	0.0308992	down				HOVUSG2555600	10.077	3.11865e-14	up				HOVUSG1930500	-1.101	0.0268833	down				HOVUSG2208800	11.063	2.98276e-17	up				HOVUSG2093500	2.675	2.25508e-10	up
HOVUSG2069200	-5.09	0.0473494	down				HOVUSG2720700	5.862	0.0221499	up				HOVUSG2555800	-1.237	0.000924678	down				HOVUSG1933200	-1.32	1.87458e-05	down				HOVUSG2216700	-2.313	0.0452326	down				HOVUSG2099700	-2.295	1.61722e-07	down
HOVUSG2071800	-1.752	0.00101507	down				HOVUSG2720800	10.808	2.74326e-16	up				HOVUSG2558900	-9.977	4.79978e-36	down				HOVUSG1934100	-1.21	0.000183286	down				HOVUSG2217600	-1.521	0.00366258	down				HOVUSG2099900	-11.589	4.01043e-19	down
HOVUSG2071900	5.695	0.0123951	up				HOVUSG2721900	9.163	7.39735e-11	up				HOVUSG2559000	-9.004	3.0294e-15	down				HOVUSG1934200	1.751	0.0035297	up				HOVUSG2217700	-6.773	2.90024e-18	down				HOVUSG2100400	-1.51	0.011987	down
HOVUSG2074400	-2.577	3.38818e-07	down				HOVUSG2722000	-1.749	0.0116861	down				HOVUSG2563000	1.893	1.48442e-13	up				HOVUSG1936000	1.902	0.0135499	up				HOVUSG2224000	-1.14	0.0270669	down				HOVUSG2102200	1.643	0.0179734	up
HOVUSG2076800	-2.513	0.000117774	down				HOVUSG2724700	-11.607	4.4136e-19	down				HOVUSG2563100	1.426	7.0936e-06	up				HOVUSG1936100	1.275	0.000454551	up				HOVUSG2224900	-2.448	5.74597e-06	down				HOVUSG2102800	1.019	0.00869883	up
HOVUSG2082200	1.469	0.0092879	up				HOVUSG2728300	1.948	1.70931e-10	up				HOVUSG2567100	-10.133	1.70251e-14	down				HOVUSG1937400	1.979	0.0276414	up				HOVUSG2229500	4.729	0.0176601	up				HOVUSG2103100	1.113	0.0370949	up
HOVUSG2082500	-1.995	0.000542773	down				HOVUSG2729100	-1.749	4.40925e-05	down				HOVUSG2567300	1.945	0.0158407	up				HOVUSG1938600	2.238	8.06563e-08	up				HOVUSG2229700	1.102	0.00117514	up				HOVUSG2106600	-1.778	0.00383937	down
HOVUSG2084600	1.095	0.00834897	up				HOVUSG2730300	-1.357	2.34625e-05	down				HOVUSG2570700	-1.178	0.00022971	down				HOVUSG1939000	1.852	1.39509e-08	up				HOVUSG2230700	-1.615	0.00485246	down				HOVUSG2106800	1.126	0.00810674	up
HOVUSG2084900	-2.006	0.00283435	down				HOVUSG2730500	-1.379	0.000665481	down				HOVUSG2573400	-1.426	0.0108124	down				HOVUSG1939300	3.218	1.66314e-14	up				HOVUSG2231700	-2.738	2.20212e-06	down				HOVUSG2110100	3.64	1.20638e-19	up
HOVUSG2085400	1.749	0.000175115	up				HOVUSG2730800	-2.46	0.0123243	down				HOVUSG2573500	-1.038	0.000505648	down				HOVUSG1942400	-7.248	1.34075e-06	down				HOVUSG2235400	2.612	0.000646448	up				HOVUSG2110600	5.086	0.0149822	up
HOVUSG2085500	1.138	9.97102e-06	up				HOVUSG2732000	2.076	7.97711e-06	up				HOVUSG2574200	-6.771	0.000135712	down				HOVUSG1945200	1.2	2.38653e-05	up				HOVUSG2237500	6.219	0.0114709	up				HOVUSG2112500	3.294	5.1244e-07	up
HOVUSG2087100	-1.377	2.93793e-05	down				HOVUSG2732400	1.284	0.0353381	up				HOVUSG2574300	-6.768	0.00012809	down				HOVUSG1945500	1.015	4.00567e-05	up				HOVUSG2244200	-1.05	0.0218179	down				HOVUSG2112800	-1.157	0.00242224	down
HOVUSG2087800	-1.428	0.000805781	down				HOVUSG2733400	-9.804	7.72909e-13	down				HOVUSG2578300	-5.315	2.60661e-14	down				HOVUSG1949800	1.466	5.8223e-09	up				HOVUSG2246800	1.813	0.00474464	up				HOVUSG2113300	10.103	5.05209e-14	up
HOVUSG2088100	-2.359	3.42297e-09	down				HOVUSG2733500	-1.764	0.00497137	down				HOVUSG2580900	-5.61	0.0168121	down				HOVUSG1949900	2.643	0.0188887	up				HOVUSG2247400	1.306	0.000176966	up				HOVUSG2113700	7.916	4.49512e-07	up
HOVUSG2091300	-1.126	2.96601e-05	down				HOVUSG2733700	-2.624	0.0303332	down				HOVUSG2581000	-8.314	1.63392e-08	down				HOVUSG1951000	-1.034	0.0129474	down				HOVUSG2248000	-4.137	0.00208813	down				HOVUSG2114200	6.976	7.45051e-05	up
HOVUSG2091800	-1.209	0.0130628	down				HOVUSG2735100	3.971	0.00352029	up				HOVUSG2584900	2.275	4.28781e-13	up				HOVUSG1951400	-1.306	0.0200296	down				HOVUSG2248400	-3.979	0.0101022	down				HOVUSG2114800	-9.126	2.82053e-11	down
HOVUSG2099400	1.373	5.89391e-07	up				HOVUSG2737000	-1.405	0.00855632	down				HOVUSG2586200	1.094	0.00350716	up				HOVUSG1951700	-2.615	0.0021699	down				HOVUSG2252000	-11.95	4.07006e-20	down				HOVUSG2115700	3.552	6.13018e-09	up
HOVUSG2102200	-1.386	0.000139983	down				HOVUSG2739000	10.155	4.80421e-14	up				HOVUSG2587100	-2.359	0.00423818	down				HOVUSG1952800	-4.184	9.94696e-06	down				HOVUSG2254100	-10.127	6.81738e-14	down				HOVUSG2116200	-2.397	0.0455164	down
HOVUSG2108200	1.029	4.6021e-10	up				HOVUSG2739100	3.019	0.0278336	up				HOVUSG2587700	1.449	0.00218606	up				HOVUSG1954400	-2.014	3.04276e-27	down				HOVUSG2257300	3.75	0.000318443	up				HOVUSG2117100	10.698	4.12267e-16	up
HOVUSG2109700	11.012	1.13949e-17	up				HOVUSG2739600	-1.444	0.000716506	down				HOVUSG2588800	5.464	4.98505e-36	up				HOVUSG1959300	6.279	0.00407698	up				HOVUSG2257500	2.874	0.000794265	up				HOVUSG2117200	-3.926	0.00106456	down
HOVUSG2110200	-6.651	0.00619028	down				HOVUSG2744000	-1.907	0.00158398	down				HOVUSG2592400	1.732	0.000293585	up				HOVUSG1959400	-1.03	0.000517025	down				HOVUSG2257700	3.203	0.0298215	up				HOVUSG2118600	-3.016	1.09221e-11	down
HOVUSG2110400	1.091	0.00936038	up				HOVUSG2757800	8.442	3.81749e-08	up				HOVUSG2593300	4.835	0.0117398	up				HOVUSG1961700	-1.201	2.08091e-06	down				HOVUSG2262300	1.047	0.00130249	up				HOVUSG2127100	-2.945	1.69491e-05	down
HOVUSG2112500	3.216	1.34675e-05	up				HOVUSG2757900	9.975	1.9452e-13	up				HOVUSG2598300	-2.328	0.00211762	down				HOVUSG1963200	1.001	4.39947e-07	up				HOVUSG2267600	4.039	6.03477e-06	up				HOVUSG2127200	-7.096	9.25305e-12	down
HOVUSG2112800	-2.546	5.1879e-06	down				HOVUSG2758400	-1.802	0.00738074	down				HOVUSG2603600	2.667	0.0135257	up				HOVUSG1963400	1.438	5.42028e-05	up				HOVUSG2273000	-1.544	0.00788329	down				HOVUSG2128700	-1.321	0.0200959	down
HOVUSG2113300	9.698	4.22576e-17	up				HOVUSG2761500	9.336	1.77296e-11	up				HOVUSG2607800	4.271	7.85687e-06	up				HOVUSG1968600	3.02	5.27743e-05	up				HOVUSG2273200	2.402	3.8219e-08	up				HOVUSG2132300	1.965	0.00221455	up
HOVUSG2113700	3.594	0.00068013	up				HOVUSG2762500	-1.013	0.0215547	down				HOVUSG2612300	2.409	0.0257069	up				HOVUSG1968700	1.756	0.0302249	up				HOVUSG2274000	-1.399	0.0459655	down				HOVUSG2142600	3.161	2.69138e-06	up
HOVUSG2115700	1.071	0.000499602	up				HOVUSG2763200	-1.195	3.0324e-05	down				HOVUSG2614100	-1.182	0.0269843	down				HOVUSG1968800	1.869	0.00178339	up				HOVUSG2274200	2.131	0.013941	up				HOVUSG2143300	1.614	9.46403e-07	up
HOVUSG2115900	1.155	7.27918e-14	up				HOVUSG2778400	1.323	0.0102301	up				HOVUSG2615100	-2.448	0.00920057	down				HOVUSG1968900	2.875	5.27211e-09	up				HOVUSG2274400	3.871	8.78971e-17	up				HOVUSG2143900	1.664	0.00321198	up
HOVUSG2116800	-3.465	0.0308203	down				HOVUSG2780400	-11.451	1.98453e-18	down				HOVUSG2615700	-2.382	0.0239772	down				HOVUSG1969100	4.346	0.000257606	up				HOVUSG2274700	-2.187	1.34043e-06	down				HOVUSG2153400	5.957	0.0096689	up
HOVUSG2118600	2.091	6.59273e-05	up				HOVUSG2781100	11.538	4.75152e-19	up				HOVUSG2620900	9.753	6.16051e-13	up				HOVUSG1969700	2.751	0.00414691	up				HOVUSG2274800	-2.325	4.48669e-06	down				HOVUSG2159600	4.113	4.19292e-06	up
HOVUSG2120300	8.471	1.23001e-12	up				HOVUSG2782000	-12.886	9.34284e-24	down				HOVUSG2622800	2.37	1.5632e-17	up				HOVUSG1972600	-1.109	0.00175171	down				HOVUSG2276900	1.463	0.0200963	up				HOVUSG2159800	5.62	0.0274541	up
HOVUSG2120700	3.643	7.26368e-09	up				HOVUSG2785000	3.671	0.036876	up				HOVUSG2626600	-2.311	3.05585e-07	down				HOVUSG1972900	-1.933	0.00190748	down				HOVUSG2278200	-2.843	0.00768275	down				HOVUSG2164100	-1.165	0.0248681	down
HOVUSG2121700	1.124	0.00160289	up				HOVUSG2787300	5.886	0.0255757	up				HOVUSG2632300	-1.848	2.18076e-08	down				HOVUSG1978000	5.548	0.0173256	up				HOVUSG2283100	1.397	4.93658e-06	up				HOVUSG2164300	-10.252	1.11031e-13	down
HOVUSG2129100	-3.15	5.22456e-06	down				HOVUSG2792500	3.216	0.00639588	up				HOVUSG2632400	-6.248	0.00135803	down				HOVUSG1989200	-1.325	0.000124223	down				HOVUSG2284500	6.285	0.00384452	up				HOVUSG2166600	2.269	1.93538e-07	up
HOVUSG2130300	-1.498	0.0019837	down				HOVUSG2806300	-2.463	0.0174136	down				HOVUSG2633300	-8.353	7.69011e-09	down				HOVUSG1990400	-2.807	0.00106606	down				HOVUSG2286100	-1.153	0.0130631	down				HOVUSG2171100	-4.384	9.57066e-07	down
HOVUSG2130900	1.74	0.000161338	up				HOVUSG2807200	9.229	1.25415e-10	up				HOVUSG2635300	2.804	0.000151648	up				HOVUSG1995500	7.967	2.73353e-05	up				HOVUSG2293400	-1.628	0.000508773	down				HOVUSG2172700	1.025	0.0328887	up
HOVUSG2133000	-3.082	3.08811e-32	down				HOVUSG2807600	10.446	3.39244e-15	up				HOVUSG2635500	-1.456	0.031669	down				HOVUSG2000300	1.69	0.000113768	up				HOVUSG2298300	-6.054	0.00810538	down				HOVUSG2176100	7.306	3.15576e-05	up
HOVUSG2136300	-2.443	1.99544e-10	down				HOVUSG2815100	-2.014	0.000851566	down				HOVUSG2636100	1.649	1.6219e-06	up				HOVUSG2001400	1.127	0.00135888	up				HOVUSG2303400	1.702	0.00301749	up				HOVUSG2177600	1.226	0.022236	up
HOVUSG2140800	3.467	9.615e-05	up				HOVUSG2818000	-12.984	2.60758e-24	down				HOVUSG2641300	7.293	1.43998e-06	up				HOVUSG2001800	1.346	0.00111492	up				HOVUSG2305900	2.101	0.0116871	up				HOVUSG2178500	3.787	0.0314692	up
HOVUSG2142000	-1.808	0.0183857	down				HOVUSG2819100	2.852	0.0190648	up				HOVUSG2641400	8.197	3.37269e-08	up				HOVUSG2002100	-8.057	4.51929e-08	down				HOVUSG2308800	3.288	0.0008746	up				HOVUSG2197500	-2.88	7.72816e-10	down
HOVUSG2143300	-1.871	8.3655e-05	down				HOVUSG2824300	9.986	1.95287e-13	up				HOVUSG2644100	3.235	0.0119235	up				HOVUSG2002500	-1.785	0.0045915	down				HOVUSG2308900	2.966	0.0277312	up				HOVUSG2198900	9.849	5.73699e-06	up
HOVUSG2148400	-1.02	1.14485e-05	down				HOVUSG2826900	-6.487	5.13111e-38	down				HOVUSG2659200	2.292	0.000126144	up				HOVUSG2003200	-1.612	4.68498e-10	down				HOVUSG2310400	4.729	1.82442e-06	up				HOVUSG2200500	-5.766	0.015737	down
HOVUSG2153400	1.078	0.0111074	up				HOVUSG2827400	-9.872	5.92795e-13	down				HOVUSG2662500	1.045	0.0339635	up				HOVUSG2006800	6.913	0.000134342	up				HOVUSG2310900	-5.523	0.0474465	down				HOVUSG2201300	4.252	0.00617946	up
HOVUSG2164200	-1.474	0.000217372	down				HOVUSG2831300	-1.327	0.00241774	down				HOVUSG2663100	-1.236	0.00996723	down				HOVUSG2007800	-1.617	0.016077	down				HOVUSG2312700	2.052	5.52833e-07	up				HOVUSG2201500	10.503	1.21808e-14	up
HOVUSG2166500	-5.094	0.0387135	down				HOVUSG2832900	-9.679	1.00577e-12	down				HOVUSG2676200	-3.438	3.49486e-22	down				HOVUSG2016600	-1.097	0.0187224	down				HOVUSG2315200	-1.494	0.00134688	down				HOVUSG2202500	7.716	8.12687e-05	up
HOVUSG2167900	-1.509	0.00178428	down				HOVUSG2840100	4.995	0.0105605	up				HOVUSG2677300	-1.544	0.000759663	down				HOVUSG2024600	4.605	0.0443122	up				HOVUSG2317700	2.05	0.042723	up				HOVUSG2203900	1.056	0.00578707	up
HOVUSG2168100	-2.645	9.97872e-19	down				HOVUSG2840200	-6.122	0.00794615	down				HOVUSG2687500	-2.449	0.00323335	down				HOVUSG2025800	3.24	4.54621e-11	up				HOVUSG2318900	-1.912	0.0477257	down				HOVUSG2206000	-6.6	5.2823e-07	down
HOVUSG2171100	-4.67	0.000573678	down				HOVUSG2841000	2.655	0.0181842	up				HOVUSG2693900	-5.371	0.0362633	down				HOVUSG2026100	-1.42	0.00771102	down				HOVUSG2319400	-2.983	0.00106897	down				HOVUSG2224900	-2.698	2.00184e-05	down
HOVUSG2176100	6.286	0.00115534	up				HOVUSG2844100	-1.197	0.00898077	down				HOVUSG2703800	1.005	0.00923686	up				HOVUSG2027700	-1.059	6.14653e-08	down				HOVUSG2319900	1.544	4.05624e-06	up				HOVUSG2231700	-2.648	1.89902e-05	down
HOVUSG2186200	8.495	1.57052e-08	up				HOVUSG2844300	-1.345	0.0123031	down				HOVUSG2706400	1.23	0.000141902	up				HOVUSG2029000	-1.461	0.00789749	down				HOVUSG2321500	-3.375	0.0370671	down				HOVUSG2236800	3.288	0.0126454	up
HOVUSG2191700	-1.587	2.28779e-05	down				HOVUSG2846300	-7.18	3.4031e-05	down				HOVUSG2716400	-2.878	2.9982e-25	down				HOVUSG2038100	-9.15	2.77753e-11	down				HOVUSG2323000	-3.439	3.51611e-06	down				HOVUSG2237500	5.887	0.0103423	up
HOVUSG2192300	-10.214	2.40283e-14	down				HOVUSG2847500	-1.502	0.00141892	down				HOVUSG2719800	9.926	2.69904e-13	up				HOVUSG2038400	4.316	6.00192e-37	up				HOVUSG2324800	1.543	2.36539e-06	up				HOVUSG2246800	2.446	2.18201e-07	up
HOVUSG2195000	1.514	0.0424655	up				HOVUSG2848100	-8.809	8.13179e-10	down				HOVUSG2720800	8.569	3.96448e-09	up				HOVUSG2040900	-1.709	0.00131898	down				HOVUSG2328300	-9.52	8.87567e-12	down				HOVUSG2247400	1.208	0.000435115	up
HOVUSG2200500	-6.868	7.21538e-05	down				HOVUSG2848200	1.444	8.32395e-09	up				HOVUSG2721600	3.202	0.0182631	up				HOVUSG2041600	-1.397	0.00157051	down				HOVUSG2329800	-1.403	0.0124315	down				HOVUSG2248000	-3.67	0.000643222	down
HOVUSG2201700	-6.357	0.00292104	down				HOVUSG2861200	-1.447	0.0389315	down				HOVUSG2721800	-2.589	9.16383e-11	down				HOVUSG2042100	3.039	5.65439e-06	up				HOVUSG2333200	1.684	0.000418689	up				HOVUSG2257300	4.09	5.64134e-06	up
HOVUSG2201800	-7.265	3.24713e-06	down				HOVUSG2862600	7.681	0.00211819	up				HOVUSG2721900	6.077	0.0239389	up				HOVUSG2042200	1.06	1.67468e-07	up				HOVUSG2335100	2.31	9.47795e-09	up				HOVUSG2257500	3.997	1.33144e-11	up
HOVUSG2202500	5.89	0.0118312	up				HOVUSG2863900	-2.402	0.00614406	down				HOVUSG2724400	-1.083	0.00729326	down				HOVUSG2042500	-1.693	0.0249406	down				HOVUSG2335600	5.596	0.0300103	up				HOVUSG2257700	3.177	0.0328307	up
HOVUSG2206000	-4.122	3.84659e-12	down				HOVUSG2864200	3.409	0.00473575	up				HOVUSG2728300	1.648	2.47163e-05	up				HOVUSG2042600	-12.842	2.80803e-24	down				HOVUSG2336800	-1.027	0.0184803	down				HOVUSG2262300	1.237	0.000764236	up
HOVUSG2208800	6.861	4.61159e-58	up				HOVUSG2864300	2.946	0.00397089	up				HOVUSG2729100	-3.73	8.88099e-05	down				HOVUSG2042700	-2.392	6.1483e-09	down				HOVUSG2337700	2.352	0.039505	up				HOVUSG2264500	1.841	0.00350135	up
HOVUSG2216700	-2.512	0.00688186	down				HOVUSG2877500	4.343	1.2903e-25	up				HOVUSG2729900	1.082	0.000724659	up				HOVUSG2045200	1.209	0.0149907	up				HOVUSG2340400	-5.639	0.0344961	down				HOVUSG2267100	-2.162	0.0405944	down
HOVUSG2217700	-6.576	0.00392042	down				HOVUSG2883100	-1.728	0.0249927	down				HOVUSG2730300	-1.476	0.0003288	down				HOVUSG2045300	6.551	0.00231606	up				HOVUSG2345600	-2.406	0.00674486	down				HOVUSG2269500	-3.229	0.0113533	down
HOVUSG2224000	1.266	0.0408315	up				HOVUSG2887700	3.594	0.0255927	up				HOVUSG2731900	3.263	0.000816063	up				HOVUSG2048600	2.648	0.00693231	up				HOVUSG2346000	-1.63	1.37014e-05	down				HOVUSG2269600	-6.876	0.000561105	down
HOVUSG2227100	1.42	0.000666946	up				HOVUSG2888800	-6.277	0.00140991	down				HOVUSG2733400	-7.455	8.0955e-06	down				HOVUSG2048800	1.162	0.0479485	up				HOVUSG2347800	-6.068	0.00876913	down				HOVUSG2270100	-1.035	0.000150957	down
HOVUSG2227500	1.634	1.45597e-07	up				HOVUSG2889300	-2.263	1.94557e-10	down				HOVUSG2735200	-1.521	0.00403898	down				HOVUSG2056400	3.142	0.0195079	up				HOVUSG2355900	7.803	1.11011e-10	up				HOVUSG2272400	-3.092	0.00676734	down
HOVUSG2229700	-1.164	0.00190734	down				HOVUSG2890400	1.74	1.0616e-08	up				HOVUSG2739300	-2.139	1.21474e-09	down				HOVUSG2057000	-1.499	3.13795e-09	down				HOVUSG2360600	2.1	0.0407575	up				HOVUSG2273200	1.54	0.00819083	up
HOVUSG2230700	-1.869	1.12482e-06	down				HOVUSG2893100	-1.278	0.000530274	down				HOVUSG2741600	7.28	1.1049e-05	up				HOVUSG2060300	-1.005	0.00153216	down				HOVUSG2360700	3.704	0.0106593	up				HOVUSG2274000	-2.942	4.27622e-25	down
HOVUSG2244200	-1.712	1.4353e-09	down				HOVUSG2900500	-11.892	3.32985e-20	down				HOVUSG2745600	-10.357	2.90947e-15	down				HOVUSG2060500	-1.905	0.0261993	down				HOVUSG2364300	12.475	3.46516e-22	up				HOVUSG2274200	7.11	4.06344e-56	up
HOVUSG2246800	-1.558	0.000844932	down				HOVUSG2900900	-2.174	0.00911442	down				HOVUSG2750900	-1.25	4.36987e-06	down				HOVUSG2066000	3.458	7.95139e-05	up				HOVUSG2364400	11.418	1.56106e-18	up				HOVUSG2274400	4.602	3.74019e-26	up
HOVUSG2251200	-1.085	0.00225334	down				HOVUSG2901600	1.375	0.00676696	up				HOVUSG2761200	1.09	0.000127106	up				HOVUSG2066500	1.724	0.0270938	up				HOVUSG2372000	-1.194	0.00958329	down				HOVUSG2274700	-1.221	0.0014162	down
HOVUSG2252000	-10.041	1.39672e-28	down				HOVUSG2905600	-2.039	0.000131961	down				HOVUSG2762200	2.516	0.0361612	up				HOVUSG2067000	-1.64	6.87899e-05	down				HOVUSG2372400	1.183	0.00430603	up				HOVUSG2278200	-3.318	0.00804243	down
HOVUSG2252800	-1.734	0.00324747	down				HOVUSG2906500	1.059	0.00857679	up				HOVUSG2763200	1.562	0.000784052	up				HOVUSG2067600	-7.576	7.43426e-07	down				HOVUSG2373600	-3.292	0.0421416	down				HOVUSG2280300	-1.024	0.00225841	down
HOVUSG2254100	-10.1	2.24342e-14	down				HOVUSG2907300	-1.239	0.0127699	down				HOVUSG2765700	-2.535	0.00645196	down				HOVUSG2070600	1.728	0.0437654	up				HOVUSG2375800	5.33	9.04902e-07	up				HOVUSG2289600	1.315	0.0027073	up
HOVUSG2254900	-1.248	0.0379218	down				HOVUSG2908600	1.247	0.000309317	up				HOVUSG2769400	11.449	8.98725e-19	up				HOVUSG2073000	-2.311	0.000174581	down				HOVUSG2379200	-2.139	0.033566	down				HOVUSG2293400	-1.922	2.13434e-06	down
HOVUSG2257300	-2.438	5.72134e-06	down				HOVUSG2911700	-1.19	0.0298974	down				HOVUSG2770000	-1.724	0.000146362	down				HOVUSG2073100	-4.306	4.20162e-16	down				HOVUSG2379500	-1.503	0.00432095	down				HOVUSG2300200	-2.152	0.000807234	down
HOVUSG2257500	-1.333	0.000730745	down				HOVUSG2918400	8.877	6.45558e-10	up				HOVUSG2770500	4.709	5.51171e-22	up				HOVUSG2074400	-9.667	1.0332e-12	down				HOVUSG2383000	2.637	0.0167476	up				HOVUSG2302100	2.495	6.94488e-10	up
HOVUSG2257700	1.106	0.00112433	up				HOVUSG2920200	1.582	0.00830865	up				HOVUSG2776100	-1.799	0.0265337	down				HOVUSG2076300	-1.073	0.000516472	down				HOVUSG2383400	1.965	0.0218902	up				HOVUSG2303200	-2.164	1.81789e-05	down
HOVUSG2267600	-1.956	0.0071859	down				HOVUSG2920500	1.763	0.00463395	up				HOVUSG2780100	1.972	2.42046e-06	up				HOVUSG2078700	1.925	0.0303068	up				HOVUSG2384900	4.662	0.000545121	up				HOVUSG2303800	10.065	4.16775e-14	up
HOVUSG2269600	-4.044	0.000729106	down				HOVUSG2922100	-1.736	3.23512e-05	down				HOVUSG2788100	-1.796	3.20132e-10	down				HOVUSG2079600	1.195	0.0117512	up				HOVUSG2385000	5.196	4.42389e-09	up				HOVUSG2306500	5.692	0.0223519	up
HOVUSG2272100	-1.796	0.00661532	down				HOVUSG2926100	1.307	0.0302115	up				HOVUSG2788200	1.066	0.00647549	up				HOVUSG2082500	-1.679	4.63087e-08	down				HOVUSG2388900	1.613	0.000376814	up				HOVUSG2307800	2.157	0.00127864	up
HOVUSG2274400	-6.393	0.000734933	down				HOVUSG2928900	-2.736	0.0458673	down				HOVUSG2790100	-9.863	3.4814e-13	down				HOVUSG2082600	-5.933	4.44071e-05	down				HOVUSG2389900	-1.923	0.0158789	down				HOVUSG2308800	4.246	4.66481e-09	up
HOVUSG2274700	-4.68	1.98771e-24	down				HOVUSG2934200	1.288	0.00154012	up				HOVUSG2790200	-10.612	1.20207e-15	down				HOVUSG2086500	-2.364	0.0318736	down				HOVUSG2394700	1.655	0.039054	up				HOVUSG2309900	3.487	0.00824154	up
HOVUSG2274800	-4.512	4.1962e-07	down				HOVUSG2937600	7.847	4.87467e-06	up				HOVUSG2806300	2.491	2.60968e-05	up				HOVUSG2086900	-1.231	1.49345e-08	down				HOVUSG2397600	1.416	0.000189619	up				HOVUSG2310400	5.373	8.67451e-11	up
HOVUSG2277200	-1.545	2.65335e-05	down				HOVUSG2944800	-1.19	0.0431773	down				HOVUSG2806800	1.628	0.0149961	up				HOVUSG2087300	-1.241	2.42836e-07	down				HOVUSG2400000	1.121	0.0171117	up				HOVUSG2311300	4.072	0.00154008	up
HOVUSG2282600	1.103	0.00890135	up				HOVUSG2946200	2.874	0.00108827	up				HOVUSG2807200	5.956	0.00866498	up				HOVUSG2089700	-1.189	0.00356359	down				HOVUSG2400300	3.709	0.0256759	up				HOVUSG2317100	2.577	3.7412e-08	up
HOVUSG2283100	-1.532	3.1027e-06	down				HOVUSG2947800	-2.784	0.0293005	down				HOVUSG2807600	9.184	2.32017e-11	up				HOVUSG2091800	-1.831	3.6075e-10	down				HOVUSG2407500	7.287	1.19501e-05	up				HOVUSG2319400	-2.405	0.00452291	down
HOVUSG2286300	1.149	0.0227709	up				HOVUSG2949800	-2.225	1.00179e-09	down				HOVUSG2808100	-4.73	0.00581788	down				HOVUSG2093500	3.353	4.29878e-72	up				HOVUSG2407700	-1.432	0.0081242	down				HOVUSG2325000	2.194	0.0234863	up
HOVUSG2286400	1.244	6.51547e-20	up				HOVUSG2949900	-6.756	0.000520419	down				HOVUSG2815300	-1.141	0.00441839	down				HOVUSG2099700	-2.888	0.0113427	down				HOVUSG2409300	1.589	0.000104875	up				HOVUSG2325100	1.614	0.0088749	up
HOVUSG2293600	1.186	3.38818e-07	up				HOVUSG2950000	5.862	0.000274331	up				HOVUSG2822800	3.886	0.000264051	up				HOVUSG2099900	-11.21	7.7594e-18	down				HOVUSG2409800	2.559	0.0253783	up				HOVUSG2326500	1.229	0.000892654	up
HOVUSG2296200	-1.254	0.000478749	down				HOVUSG2950800	-6.164	0.0053325	down				HOVUSG2826900	-7.764	7.65854e-36	down				HOVUSG2100400	-1.278	0.0404475	down				HOVUSG2410000	2.714	0.0405498	up				HOVUSG2326900	4.065	6.64737e-13	up
HOVUSG2297500	-1.053	1.23733e-10	down				HOVUSG2951400	-1.312	0.037223	down				HOVUSG2827400	-5.575	3.00721e-08	down				HOVUSG2103300	1.649	0.00353531	up				HOVUSG2411800	4.275	0.00477237	up				HOVUSG2327000	3.442	0.0023471	up
HOVUSG2300700	-4.537	0.0123387	down				HOVUSG2951700	9.025	1.70483e-10	up				HOVUSG2830200	1.312	1.58564e-05	up				HOVUSG2106200	-1.158	6.63279e-07	down				HOVUSG2421200	1.206	0.0128682	up				HOVUSG2331900	1.188	0.00407964	up
HOVUSG2302400	1.944	5.59315e-08	up				HOVUSG2952200	2.688	1.93474e-08	up				HOVUSG2841100	3.732	0.0010445	up				HOVUSG2106900	5.336	0.031976	up				HOVUSG2423800	-1.27	0.00123377	down				HOVUSG2333200	3.021	3.93589e-15	up
HOVUSG2306100	5.749	0.0092879	up				HOVUSG2952500	2.771	0.00140326	up				HOVUSG2843100	1.839	0.0200416	up				HOVUSG2108900	2.155	0.000891241	up				HOVUSG2429100	3.313	0.00399311	up				HOVUSG2333600	2.249	0.000262045	up
HOVUSG2307200	2.08	3.26989e-06	up				HOVUSG2954100	6.145	4.15481e-13	up				HOVUSG2844100	1.479	9.43483e-07	up				HOVUSG2109300	1.502	0.00487414	up				HOVUSG2431100	-6.272	0.00328784	down				HOVUSG2335100	2.497	2.02755e-12	up
HOVUSG2307800	-2.664	4.55264e-09	down				HOVUSG2954700	-1.168	0.00186669	down				HOVUSG2848100	-7.693	5.71553e-07	down				HOVUSG2112400	4.011	0.0213381	up				HOVUSG2438700	-2.843	2.6264e-06	down				HOVUSG2337500	5.998	0.00504486	up
HOVUSG2308800	1.031	0.0134803	up				HOVUSG2958700	-1.642	0.00140499	down				HOVUSG2849900	-1.418	0.000521421	down				HOVUSG2112500	3.623	8.51425e-10	up				HOVUSG2438800	-3.185	1.01752e-17	down				HOVUSG2337700	3.084	7.81887e-05	up
HOVUSG2310400	5.958	3.01318e-12	up				HOVUSG2963500	1.407	0.00850338	up				HOVUSG2860400	-1.679	0.00747577	down				HOVUSG2113300	6.951	6.95117e-26	up				HOVUSG2443100	2.067	6.51831e-07	up				HOVUSG2340400	2.289	0.0128193	up
HOVUSG2310700	7.557	1.68471e-06	up				HOVUSG2969300	-1.626	0.0157369	down				HOVUSG2863400	-1.074	0.0429876	down				HOVUSG2113700	7.225	1.16873e-05	up				HOVUSG2443600	3.692	0.0365894	up				HOVUSG2348500	1.512	0.0127911	up
HOVUSG2310900	-4.729	0.00778448	down				HOVUSG2971500	-1.79	0.00785492	down				HOVUSG2868600	6.471	0.00278631	up				HOVUSG2114800	-9.204	1.5639e-11	down				HOVUSG2444600	-1.526	3.16708e-07	down				HOVUSG2354000	3.037	1.63544e-14	up
HOVUSG2312700	1.305	0.00372733	up				HOVUSG2976600	1.173	0.0290485	up				HOVUSG2880300	-1.209	0.0290533	down				HOVUSG2115900	1.102	9.32576e-11	up				HOVUSG2446200	2.339	3.11953e-05	up				HOVUSG2354100	8.204	3.16679e-08	up
HOVUSG2313100	-4.933	4.0006e-12	down				HOVUSG2977800	-1.628	0.00107313	down				HOVUSG2883300	-2.872	8.98671e-10	down				HOVUSG2116200	-4.715	1.82527e-05	down				HOVUSG2453100	-1.373	0.00157605	down				HOVUSG2354600	3.468	6.64157e-07	up
HOVUSG2315200	-1.784	6.55675e-14	down				HOVUSG2978600	4.891	0.000127738	up				HOVUSG2888400	6.847	0.000149836	up				HOVUSG2116800	2.157	0.0100687	up				HOVUSG2458800	1.668	0.00696549	up				HOVUSG2355900	7.668	2.38969e-10	up
HOVUSG2316600	-7.137	8.48103e-05	down				HOVUSG2978700	2.889	2.29929e-12	up				HOVUSG2888800	-6.618	0.000473066	down				HOVUSG2116900	2.106	0.0164333	up				HOVUSG2459000	5.914	0.00966277	up				HOVUSG2356700	1.121	0.00610448	up
HOVUSG2317700	1.647	0.00753747	up				HOVUSG2980200	-2.522	6.93267e-07	down				HOVUSG2892500	11.432	9.95734e-19	up				HOVUSG2117100	9.996	2.59681e-13	up				HOVUSG2459900	1.659	2.63794e-05	up				HOVUSG2356800	2.577	4.18567e-08	up
HOVUSG2317800	-6.236	0.000744613	down				HOVUSG2980400	-2.004	0.0265937	down				HOVUSG2901800	2.127	0.00590371	up				HOVUSG2117200	-7.258	8.17018e-06	down				HOVUSG2461400	1.452	0.000674586	up				HOVUSG2357100	-7.956	2.65364e-07	down
HOVUSG2318400	2.145	3.78723e-07	up				HOVUSG2981200	-1.472	0.00850338	down				HOVUSG2905500	-7.886	2.21639e-08	down				HOVUSG2117800	-1.345	1.47419e-07	down				HOVUSG2463100	7.949	1.80993e-07	up				HOVUSG2357500	-7.18	2.60401e-05	down
HOVUSG2321500	-4.439	3.27484e-13	down				HOVUSG2981900	-7.377	2.69156e-05	down				HOVUSG2908600	1.247	1.35519e-06	up				HOVUSG2119000	1.24	0.000938801	up				HOVUSG2464100	-6.684	5.31737e-07	down				HOVUSG2357900	-1.319	0.00471311	down
HOVUSG2322200	-5.581	0.0115361	down				HOVUSG2984100	4.826	4.9543e-17	up				HOVUSG2909400	2.453	7.78286e-05	up				HOVUSG2127100	-2.306	0.000222035	down				HOVUSG2464200	-1.372	0.0422064	down				HOVUSG2358000	6.202	6.6651e-06	up
HOVUSG2323000	-3.961	2.2626e-13	down				HOVUSG2984300	-7.33	2.50971e-05	down				HOVUSG2911700	1.329	9.1982e-05	up				HOVUSG2127200	-6.57	5.4846e-13	down				HOVUSG2466900	-8.459	2.11031e-08	down				HOVUSG2359400	-3.864	1.60634e-06	down
HOVUSG2325000	1.519	9.18973e-05	up				HOVUSG2984700	-3.035	0.0190337	down				HOVUSG2914800	1.633	0.000281406	up				HOVUSG2131300	2.039	0.000323801	up				HOVUSG2467200	1.568	2.00378e-05	up				HOVUSG2365000	-1.799	0.000627377	down
HOVUSG2325800	6.871	4.37911e-05	up				HOVUSG2985000	-1.936	2.17028e-07	down				HOVUSG2926100	2.001	0.000658033	up				HOVUSG2132300	-1.787	0.000452704	down				HOVUSG2471900	1.607	1.15892e-05	up				HOVUSG2371000	-1.176	0.00656204	down
HOVUSG2326100	3.961	2.99325e-21	up				HOVUSG2985900	3.089	6.40601e-10	up				HOVUSG2927100	2.046	0.00406282	up				HOVUSG2135100	-1.204	0.000846164	down				HOVUSG2475500	3.31	2.6478e-08	up				HOVUSG2371100	-1.432	4.01774e-06	down
HOVUSG2326300	1.214	0.0192682	up				HOVUSG2988400	-9.366	1.07632e-11	down				HOVUSG2929100	-1.318	1.81463e-06	down				HOVUSG2138100	1.402	0.0165856	up				HOVUSG2476200	-5.247	0.0218874	down				HOVUSG2372000	-1.252	0.000406984	down
HOVUSG2328300	-10.594	5.16617e-16	down				HOVUSG2990400	1.796	0.00266055	up				HOVUSG2929900	-2.783	0.011999	down				HOVUSG2138900	2.227	1.58573e-14	up				HOVUSG2476300	5.591	0.00485246	up				HOVUSG2375800	3.454	0.037655	up
HOVUSG2333300	-1.031	1.81283e-05	down				HOVUSG3004400	-1.021	0.0405603	down				HOVUSG2931300	1.33	0.00257798	up				HOVUSG2139400	-1.042	0.0251179	down				HOVUSG2476900	-1.274	0.0049384	down				HOVUSG2378100	-1.824	0.0440805	down
HOVUSG2333700	-1.968	5.31644e-07	down				HOVUSG3012500	1.098	0.00670552	up				HOVUSG2934800	-3.98	0.00340101	down				HOVUSG2141600	-1.518	1.11808e-13	down				HOVUSG2477200	2.141	4.61084e-06	up				HOVUSG2383000	3.046	0.00112343	up
HOVUSG2342700	1.745	0.00988884	up				HOVUSG3015700	-1.167	0.0440815	down				HOVUSG2942600	-1.874	0.000314537	down				HOVUSG2142000	-1.63	2.25199e-05	down				HOVUSG2477400	1.066	0.0480434	up				HOVUSG2384600	4.888	5.05176e-05	up
HOVUSG2348500	-8.395	1.20478e-08	down				HOVUSG3023300	1.273	0.0086717	up				HOVUSG2944800	1.467	0.0101596	up				HOVUSG2145300	-2.157	0.0018018	down				HOVUSG2478700	1.263	8.72244e-05	up				HOVUSG2384900	5.119	1.31848e-05	up
HOVUSG2348600	-5.944	0.0025267	down				HOVUSG3030900	-1.143	0.0162697	down				HOVUSG2949600	3.785	0.00117111	up				HOVUSG2164100	1.187	0.0111281	up				HOVUSG2480400	-1.25	0.0113332	down				HOVUSG2385000	5.29	4.62022e-10	up
HOVUSG2350700	1.419	1.0318e-06	up				HOVUSG3031100	5.889	0.0200479	up				HOVUSG2949800	-2.139	1.46018e-11	down				HOVUSG2164300	-10.439	2.23185e-15	down				HOVUSG2484900	1.619	0.000276802	up				HOVUSG2386400	2.822	0.00229468	up
HOVUSG2352400	1.13	0.000176215	up				HOVUSG3031200	4.706	0.000129093	up				HOVUSG2951300	4.746	1.29653e-06	up				HOVUSG2166100	-1.604	1.38656e-06	down				HOVUSG2487200	-11.68	3.50479e-19	down				HOVUSG2387900	-1.327	0.000119355	down
HOVUSG2354000	1.636	0.0429429	up				HOVUSG3038400	-1.345	0.00011964	down				HOVUSG2951400	-1.912	7.24381e-11	down				HOVUSG2166400	-6.552	0.000257448	down				HOVUSG2491700	1.869	0.000999212	up				HOVUSG2388800	-1.31	0.0130057	down
HOVUSG2355900	8.994	1.72185e-15	up				HOVUSG3047700	1.314	0.047014	up				HOVUSG2951500	-1.888	3.05585e-07	down				HOVUSG2166600	1.004	0.035229	up				HOVUSG2492900	1.362	4.69086e-05	up				HOVUSG2389900	-3.81	8.30473e-07	down
HOVUSG2362000	-1.072	0.000893709	down				HOVUSG3055200	-5.739	2.37989e-10	down				HOVUSG2951700	7.789	4.59287e-07	up				HOVUSG2168100	1.03	0.0126627	up				HOVUSG2499200	-1.99	0.000673757	down				HOVUSG2403200	1.848	0.0284867	up
HOVUSG2362400	-1.113	0.00041007	down				HOVUSG3062400	1.23	0.0272294	up				HOVUSG2952600	-1.036	0.000454783	down				HOVUSG2168400	-5.694	0.0262952	down				HOVUSG2505700	-1.024	0.0288991	down				HOVUSG2403300	2.44	0.00792434	up
HOVUSG2364300	13.166	1.99786e-24	up				HOVUSG3062900	-1.475	0.0114444	down				HOVUSG2954100	6.006	0.000745191	up				HOVUSG2171100	-2.42	0.047595	down				HOVUSG2509500	1.509	0.0092851	up				HOVUSG2407500	7.665	4.59889e-06	up
HOVUSG2364400	11.181	5.01091e-23	up				HOVUSG3067300	1.839	0.00814486	up				HOVUSG2960400	-8.226	1.59443e-08	down				HOVUSG2176100	8.159	6.11775e-08	up				HOVUSG2510600	5.76	0.0153506	up				HOVUSG2407700	-1.392	0.0154066	down
HOVUSG2365000	1.037	8.83165e-05	up				HOVUSG3087000	-10.048	8.14685e-14	down				HOVUSG2961200	-2.044	1.53464e-13	down				HOVUSG2194900	5.225	0.0426798	up				HOVUSG2511600	2.927	4.4004e-06	up				HOVUSG2412000	2.693	0.00237902	up
HOVUSG2372400	1.057	0.000891298	up				HOVUSG3090100	10.965	7.44019e-17	up				HOVUSG2961600	1.218	0.0001243	up				HOVUSG2198900	2.982	0.0159827	up				HOVUSG2515900	-8.314	2.70107e-08	down				HOVUSG2416300	-6.28	0.00699375	down
HOVUSG2373500	2.391	0.000763329	up				HOVUSG3090400	7.173	1.26285e-05	up				HOVUSG2963000	1.151	0.0179183	up				HOVUSG2200500	-5.282	0.00517459	down				HOVUSG2521500	-1.194	0.0218307	down				HOVUSG2421100	-1.307	0.00283194	down
HOVUSG2375800	1.143	0.0157864	up				HOVUSG3090900	1.884	8.63351e-06	up				HOVUSG2969000	-1.609	0.00539942	down				HOVUSG2206000	-5.711	2.7652e-11	down				HOVUSG2522700	1.392	0.000226913	up				HOVUSG2421200	1.395	0.001595	up
HOVUSG2378600	-5.49	0.0134803	down				HOVUSG3091600	6.465	0.00986505	up				HOVUSG2971500	2.447	0.0175666	up				HOVUSG2207500	1.011	0.000172033	up				HOVUSG2523000	-1.061	0.000462848	down				HOVUSG2422800	5.79	0.0439841	up
HOVUSG2378900	-1.954	0.0234098	down				HOVUSG3097800	-1.473	0.0174602	down				HOVUSG2978600	4.236	4.47074e-17	up				HOVUSG2211100	-2.437	0.00551726	down				HOVUSG2524400	3.593	0.0223935	up				HOVUSG2431800	-1.751	0.010892	down
HOVUSG2379700	-2.349	0.00423938	down				HOVUSG3105900	1.629	0.047641	up				HOVUSG2978700	3.081	3.30205e-21	up				HOVUSG2213000	-1.056	0.000396776	down				HOVUSG2524800	4.666	0.0354244	up				HOVUSG2438700	-1.607	0.0172671	down
HOVUSG2379900	-1.099	0.00171955	down				HOVUSG3108700	2.597	2.71625e-09	up				HOVUSG2980300	3.545	1.32422e-13	up				HOVUSG2218300	-1.092	0.00220733	down				HOVUSG2525800	1.014	0.0125462	up				HOVUSG2438800	-1.283	0.00108636	down
HOVUSG2380400	-2.368	0.016626	down				HOVUSG3109000	-1.486	3.0324e-05	down				HOVUSG2981900	-5.889	0.0081103	down				HOVUSG2224900	-3.539	5.69619e-17	down				HOVUSG2531400	-3.189	1.62987e-12	down				HOVUSG2443100	2.765	1.2069e-10	up
HOVUSG2384900	-6.297	0.000773203	down				HOVUSG3109100	1.623	0.000585237	up				HOVUSG2983600	3.596	2.44237e-11	up				HOVUSG2229700	-1.144	0.0103246	down				HOVUSG2531600	-1.313	0.00165796	down				HOVUSG2443600	3.564	0.0337176	up
HOVUSG2389900	5.309	0.0435993	up				HOVUSG3115700	1.104	0.0411423	up				HOVUSG2984400	-8.545	1.73228e-09	down				HOVUSG2231200	-3.227	5.2202e-05	down				HOVUSG2533000	5.715	0.0159279	up				HOVUSG2444600	-1.806	3.86212e-11	down
HOVUSG2394600	1.125	0.0215736	up				HOVUSG3115900	1.504	0.0417193	up				HOVUSG2984700	-6.391	0.00102737	down				HOVUSG2231600	1.03	7.81927e-09	up				HOVUSG2534800	2.814	1.88588e-05	up				HOVUSG2445000	-3.4	0.0485927	down
HOVUSG2396500	1.096	6.78136e-05	up				HOVUSG3121300	5.046	0.0283863	up				HOVUSG2985000	-1.335	3.13938e-05	down				HOVUSG2232000	1.176	3.22266e-09	up				HOVUSG2534900	-7.927	3.33804e-07	down				HOVUSG2446200	2.077	0.000601677	up
HOVUSG2398300	1.09	0.0233384	up				HOVUSG3124300	-2.052	4.7859e-17	down				HOVUSG2985400	6.76	0.000288451	up				HOVUSG2240600	1.531	0.000377739	up				HOVUSG2535100	2.408	0.0136484	up				HOVUSG2456700	-3.35	1.13807e-08	down
HOVUSG2399900	-1.264	0.0451835	down				HOVUSG3130300	-8.048	1.93704e-07	down				HOVUSG2985600	-3.061	0.000767442	down				HOVUSG2242500	5.519	0.0199453	up				HOVUSG2535200	4.454	1.47176e-07	up				HOVUSG2458800	1.568	0.00771089	up
HOVUSG2402100	-1.21	0.0349326	down				HOVUSG3140900	1.099	0.0269051	up				HOVUSG2985900	-2.314	7.94534e-08	down				HOVUSG2250100	1.072	0.0113527	up				HOVUSG2536100	1.039	0.0258926	up				HOVUSG2459900	1.388	7.11763e-05	up
HOVUSG2403700	1.055	0.0112548	up				HOVUSG3142300	-1.054	0.0247367	down				HOVUSG2987700	3.545	0.000199712	up				HOVUSG2253300	-1.059	8.39651e-08	down				HOVUSG2536400	-4.464	4.00359e-05	down				HOVUSG2460900	-1.158	0.000271689	down
HOVUSG2404700	1.537	0.00148547	up				HOVUSG3143100	9.967	1.49515e-13	up				HOVUSG2988400	-7.95	8.93929e-08	down				HOVUSG2255700	1.078	0.000205395	up				HOVUSG2536500	-1.47	0.000229514	down				HOVUSG2461400	2.278	1.50235e-09	up
HOVUSG2409700	-6.121	0.00298106	down				HOVUSG3153700	-1.125	0.0275828	down				HOVUSG2996200	1.535	0.0135257	up				HOVUSG2257300	-2.049	0.0233043	down				HOVUSG2539800	-2.672	0.00025793	down				HOVUSG2463200	3.149	0.000618391	up
HOVUSG2410700	-1.063	0.00621576	down				HOVUSG3160400	8.552	1.01977e-07	up				HOVUSG3000900	1.533	0.0244212	up				HOVUSG2264500	1.287	5.83024e-05	up				HOVUSG2540900	2.491	0.000166071	up				HOVUSG2464100	-8.463	7.66636e-09	down
HOVUSG2412000	-6.155	0.00167	down				HOVUSG3161700	1.796	0.00871517	up				HOVUSG3001100	2.6	0.0309424	up				HOVUSG2266800	2.031	6.17376e-09	up				HOVUSG2541100	2.526	3.93797e-10	up				HOVUSG2464200	-1.808	0.00362131	down
HOVUSG2420500	-1.417	0.00330573	down				HOVUSG3165700	-1.057	0.0270615	down				HOVUSG3002100	1.33	0.0241913	up				HOVUSG2269600	-7.389	0.000234502	down				HOVUSG2551300	5.74	0.0268916	up				HOVUSG2467200	1.232	0.0224388	up
HOVUSG2431100	-6.692	3.33376e-10	down				HOVUSG3169900	-1.444	0.000935828	down				HOVUSG3005300	1.808	0.000370388	up				HOVUSG2269800	1.013	5.4353e-07	up				HOVUSG2553900	2.057	5.23835e-07	up				HOVUSG2471900	1.134	0.0011399	up
HOVUSG2433500	-1.52	0.00540887	down				HOVUSG3173200	-1.056	0.000776262	down				HOVUSG3005700	-2.437	0.0274373	down				HOVUSG2272400	2.184	0.000257606	up				HOVUSG2555600	9.985	2.35117e-13	up				HOVUSG2478700	1.383	1.79296e-05	up
HOVUSG2434100	-1.254	0.000102829	down				HOVUSG3181100	2.41	0.000138213	up				HOVUSG3007900	1.398	0.00682766	up				HOVUSG2273200	-1.736	1.31272e-06	down				HOVUSG2555800	-1.417	9.16265e-05	down				HOVUSG2479500	-1.374	0.00108131	down
HOVUSG2435100	-1.137	0.00152667	down				HOVUSG3182200	-1.261	0.0346412	down				HOVUSG3019200	1.744	0.00390077	up				HOVUSG2274200	4.075	2.40035e-06	up				HOVUSG2558900	-11.495	2.75818e-18	down				HOVUSG2479700	2.215	0.0172382	up
HOVUSG2438700	-2.908	4.59865e-09	down				HOVUSG3183600	1.738	0.0201452	up				HOVUSG3020500	-1.083	0.00854857	down				HOVUSG2274400	2.991	9.87529e-07	up				HOVUSG2559000	-10.598	7.11256e-16	down				HOVUSG2480000	1.689	0.00499478	up
HOVUSG2438800	-2.376	1.11167e-15	down				HOVUSG3184800	-8.124	1.94577e-07	down				HOVUSG3036400	-1.46	0.00355544	down				HOVUSG2274600	-1.27	5.50246e-05	down				HOVUSG2559300	1.877	0.0190056	up				HOVUSG2481000	1.099	0.000995359	up
HOVUSG2449600	2.355	8.39512e-05	up				HOVUSG3184900	-7.795	8.02282e-07	down				HOVUSG3036500	2.624	8.93929e-08	up				HOVUSG2274700	-1.362	3.30452e-07	down				HOVUSG2560600	-2.439	0.00571984	down				HOVUSG2481300	-1.759	0.00671537	down
HOVUSG2453900	1.137	0.0191405	up				HOVUSG3185000	-6.098	0.000820792	down				HOVUSG3040300	-1.27	0.0228962	down				HOVUSG2274800	-1.191	0.00134136	down				HOVUSG2563000	1.334	0.000124251	up				HOVUSG2485600	6.857	0.000114373	up
HOVUSG2458200	-4.929	3.48178e-05	down				HOVUSG3185400	2.342	5.3094e-06	up				HOVUSG3040600	3.595	6.79136e-20	up				HOVUSG2281700	-2.119	0.00052191	down				HOVUSG2563100	2.163	1.39276e-07	up				HOVUSG2487200	-11.592	3.45379e-19	down
HOVUSG2458300	-7.209	4.40022e-06	down				HOVUSG3185500	-1.308	0.00827791	down				HOVUSG3040900	-1.891	2.0708e-05	down				HOVUSG2285700	-1.094	0.009232	down				HOVUSG2564800	-1.223	0.0124979	down				HOVUSG2490100	-1.419	0.00537139	down
HOVUSG2461800	1.411	0.0103718	up				HOVUSG3185700	2.276	0.00939477	up				HOVUSG3047300	-9.76	2.93416e-13	down				HOVUSG2286100	-1.055	0.000174647	down				HOVUSG2567100	-10.216	2.63696e-14	down				HOVUSG2491700	1.361	0.0360913	up
HOVUSG2463100	7.06	1.64172e-05	up				HOVUSG3186200	-8.616	6.19814e-09	down				HOVUSG3049700	-2.153	0.0389981	down				HOVUSG2293300	-1.105	5.07358e-06	down				HOVUSG2570700	2.15	0.000333205	up				HOVUSG2492400	-1.332	0.0311187	down
HOVUSG2464100	-7.797	2.77449e-08	down				HOVUSG3186300	-9.514	5.43641e-12	down				HOVUSG3051400	-2.167	0.0255421	down				HOVUSG2293400	1.024	0.00571123	up				HOVUSG2574200	-6.951	0.000421876	down				HOVUSG2495600	-2.894	1.61592e-05	down
HOVUSG2465700	-1.98	0.0314561	down				HOVUSG3190200	-6.471	0.00902944	down				HOVUSG3055200	-5.253	1.90874e-05	down				HOVUSG2300200	1.463	0.0128987	up				HOVUSG2574300	-6.49	0.00134838	down				HOVUSG2499200	-3.047	9.42572e-10	down
HOVUSG2466900	-8.481	2.52152e-09	down				HOVUSG3192700	-1.548	0.0411261	down				HOVUSG3058200	2.461	0.0139034	up				HOVUSG2301800	1.366	0.00525544	up				HOVUSG2578300	-4.808	1.16908e-22	down				HOVUSG2504600	2.638	0.0498351	up
HOVUSG2471000	4.17	0.000814658	up				HOVUSG3194800	1.119	0.0297875	up				HOVUSG3062100	-2.003	0.00131152	down				HOVUSG2302100	2.826	2.95691e-32	up				HOVUSG2580900	-6.555	0.000976312	down				HOVUSG2505700	-1.048	0.0163833	down
HOVUSG2473000	1.132	6.69287e-12	up				HOVUSG3195100	1.13	0.00140002	up				HOVUSG3068400	1.055	0.00105166	up				HOVUSG2303200	1.204	0.00105898	up				HOVUSG2581000	-8.151	1.12514e-07	down				HOVUSG2515800	4.589	0.0166	up
HOVUSG2475000	-5.579	1.89395e-78	down				HOVUSG3199600	1.495	0.00573304	up				HOVUSG3073500	2.044	0.00440778	up				HOVUSG2303800	10.997	1.58718e-17	up				HOVUSG2582800	1.029	0.00693681	up				HOVUSG2522700	1.249	0.0130815	up
HOVUSG2476300	5.426	0.00323432	up				HOVUSG3200200	-1.874	0.00610665	down				HOVUSG3073800	-1.155	0.00109042	down				HOVUSG2310400	6.832	2.2457e-14	up				HOVUSG2584100	1.124	0.000788097	up				HOVUSG2523000	-1.096	0.000338013	down
HOVUSG2477200	-1.617	0.00137538	down				HOVUSG3201100	-1	0.0409026	down				HOVUSG3074300	-3.245	1.14543e-16	down				HOVUSG2313200	-1.027	5.03099e-06	down				HOVUSG2585800	3.431	0.000436397	up				HOVUSG2524200	6.469	2.20068e-09	up
HOVUSG2477400	1.104	7.79603e-08	up				HOVUSG3201300	-2.4	0.00202182	down				HOVUSG3078400	-1.277	0.00634096	down				HOVUSG2317200	2.319	7.2044e-07	up				HOVUSG2586300	2.106	0.00627905	up				HOVUSG2524300	8.29	2.47792e-08	up
HOVUSG2477700	1.612	1.44079e-07	up				HOVUSG3201800	-1.745	9.26896e-08	down				HOVUSG3082000	-1.341	0.0156256	down				HOVUSG2318900	1.687	0.0374277	up				HOVUSG2588800	3.65	8.48306e-20	up				HOVUSG2524400	3.491	0.016866	up
HOVUSG2478400	1.229	6.91097e-08	up				HOVUSG3209700	-1.135	0.0378154	down				HOVUSG3083300	-2.582	1.56235e-16	down				HOVUSG2324800	-1.706	7.02598e-11	down				HOVUSG2593100	2.948	7.38244e-06	up				HOVUSG2524800	4.568	0.020333	up
HOVUSG2479500	1.514	0.0142205	up				HOVUSG3214400	-5.573	0.0405467	down				HOVUSG3086200	3.236	2.26755e-36	up				HOVUSG2325100	-1.254	0.00614255	down				HOVUSG2594900	2.344	0.0225289	up				HOVUSG2525000	-2.223	3.49187e-06	down
HOVUSG2487100	7.457	1.39234e-06	up				HOVUSG3217000	-6.057	6.99839e-64	down				HOVUSG3087000	-8.681	3.48643e-09	down				HOVUSG2326300	-1.12	9.70286e-06	down				HOVUSG2598300	-1.584	0.00945405	down				HOVUSG2525800	-2.509	3.04999e-11	down
HOVUSG2487200	-12.826	2.33455e-24	down				HOVUSG3218400	-1.052	0.0323212	down				HOVUSG3087800	1.295	0.0230386	up				HOVUSG2326500	-1.049	0.00681514	down				HOVUSG2607800	4.054	7.93038e-05	up				HOVUSG2528800	4.189	2.77826e-13	up
HOVUSG2491400	1.212	0.00315008	up				HOVUSG3227100	2.63	2.22193e-05	up				HOVUSG3091800	1.458	1.56239e-06	up				HOVUSG2326900	-1.908	0.039631	down				HOVUSG2610400	1.063	0.0298016	up				HOVUSG2531400	-1.806	4.94079e-06	down
HOVUSG2494200	-5.056	0.009003	down				HOVUSG3227300	-1.987	0.0222136	down				HOVUSG3093400	6.681	0.000381686	up				HOVUSG2330900	2.459	0.0074193	up				HOVUSG2612700	-3.846	0.00354039	down				HOVUSG2534900	-7.839	3.35213e-07	down
HOVUSG2497400	-2.266	0.000107795	down				HOVUSG3227600	-1.466	0.000197761	down				HOVUSG3094000	-1.301	8.11875e-06	down				HOVUSG2331200	-1.763	0.0012276	down				HOVUSG2615200	1.147	0.0301512	up				HOVUSG2535100	2.434	0.00613319	up
HOVUSG2505700	-1.189	6.23925e-05	down				HOVUSG3230500	-10.919	2.57046e-16	down				HOVUSG3097800	1.378	0.0477282	up				HOVUSG2333200	1.652	5.22038e-17	up				HOVUSG2615900	1.622	0.0259939	up				HOVUSG2535200	5.004	4.79248e-11	up
HOVUSG2510600	6.463	0.000710795	up				HOVUSG3231200	-5.898	0.0348643	down				HOVUSG3099600	-7.868	1.84432e-07	down				HOVUSG2333300	1.624	3.70218e-06	up				HOVUSG2616500	1.954	0.000673409	up				HOVUSG2535300	2.475	0.0150444	up
HOVUSG2511600	-1.221	0.00310628	down				HOVUSG3232600	1.203	0.00995387	up				HOVUSG3101000	1.415	0.00710024	up				HOVUSG2335100	-1.474	0.000107941	down				HOVUSG2620900	9.095	1.25233e-10	up				HOVUSG2536100	1.533	0.000144481	up
HOVUSG2515900	-8.7	7.55893e-11	down				HOVUSG3233800	-1.008	0.0159925	down				HOVUSG3104300	-1.695	0.0392462	down				HOVUSG2336300	-2.092	0.0268455	down				HOVUSG2621200	1.464	2.7984e-05	up				HOVUSG2536400	-7.872	3.64149e-07	down
HOVUSG2522500	-1.863	0.0353319	down				HOVUSG3237600	-1.714	0.000121307	down				HOVUSG3108700	3.777	5.88445e-37	up				HOVUSG2336700	-1.254	0.0115592	down				HOVUSG2621900	-1.756	0.00388651	down				HOVUSG2536500	-1.084	0.00248836	down
HOVUSG2523300	-1.15	0.00107585	down				HOVUSG3237800	-1.93	0.0127589	down				HOVUSG3109000	2.851	0.000272826	up				HOVUSG2337300	-1.228	0.00517459	down				HOVUSG2622800	2.549	1.81723e-13	up				HOVUSG2538800	5.37	0.042768	up
HOVUSG2526400	-2.368	4.7074e-05	down				HOVUSG3238000	-1.74	0.0231043	down				HOVUSG3112900	-1.947	5.72882e-06	down				HOVUSG2337700	-2.945	5.78239e-08	down				HOVUSG2626600	-3.182	2.31093e-13	down				HOVUSG2539200	4.061	5.36976e-13	up
HOVUSG2529600	1.301	0.00373716	up				HOVUSG3241200	5.961	0.0156933	up				HOVUSG3113400	-1.38	0.0144888	down				HOVUSG2338900	2.964	0.000158724	up				HOVUSG2632200	-1.488	0.0276174	down				HOVUSG2539700	-6.304	1.2721e-05	down
HOVUSG2530400	4.787	0.0251139	up				HOVUSG3241800	-5.79	0.020771	down				HOVUSG3116300	1.032	0.000791935	up				HOVUSG2339800	1.532	8.31022e-09	up				HOVUSG2632300	-2.209	1.46835e-07	down				HOVUSG2540100	-1.152	9.3373e-07	down
HOVUSG2530800	-1.636	1.24575e-09	down				HOVUSG3242300	5.235	9.51551e-15	up				HOVUSG3124100	-1.382	7.24037e-07	down				HOVUSG2344100	-1.359	4.94874e-07	down				HOVUSG2632400	-7.091	0.000110072	down				HOVUSG2540900	2.389	0.000332307	up
HOVUSG2531900	1.508	0.0249666	up				HOVUSG3252200	-1.478	0.00410132	down				HOVUSG3125700	-5.63	0.0172393	down				HOVUSG2344800	1.04	0.0268455	up				HOVUSG2633300	-8.072	2.04678e-07	down				HOVUSG2541100	2.381	1.48325e-18	up
HOVUSG2534900	-8.944	6.36776e-11	down				HOVUSG3253500	2.667	0.0133549	up				HOVUSG3128200	4.748	0.000471615	up				HOVUSG2346000	1.185	6.69762e-06	up				HOVUSG2634500	1.175	0.00702381	up				HOVUSG2542000	-4.225	0.000654982	down
HOVUSG2535100	2.887	9.93088e-10	up				HOVUSG3253700	1.046	0.00863418	up				HOVUSG3128300	1.78	0.0190779	up				HOVUSG2354100	7.641	6.84634e-07	up				HOVUSG2637200	1.368	0.0014261	up				HOVUSG2547000	-1.976	0.000197977	down
HOVUSG2535200	5.286	1.1604e-17	up				HOVUSG3260200	1.099	0.00176082	up				HOVUSG3133400	2.084	0.00536431	up				HOVUSG2354600	3.011	0.00248532	up				HOVUSG2641300	7.003	6.85778e-05	up				HOVUSG2551300	5.98	0.00927969	up
HOVUSG2535300	2.275	0.000114385	up				HOVUSG3270300	-10.061	3.02314e-13	down				HOVUSG3135300	1.495	0.0217562	up				HOVUSG2355900	7.125	1.06154e-16	up				HOVUSG2641400	7.503	4.10495e-07	up				HOVUSG2553900	2.135	3.18749e-08	up
HOVUSG2536400	-2.513	0.000192456	down				HOVUSG3276700	1.096	0.00949928	up				HOVUSG3139300	-1.422	0.000221478	down				HOVUSG2356700	1.588	1.03485e-08	up				HOVUSG2645200	1.752	0.000427443	up				HOVUSG2555600	10.619	7.01651e-16	up
HOVUSG2536500	-1.607	7.8619e-12	down				HOVUSG3279400	1.925	0.0140122	up				HOVUSG3139500	-1.219	3.57703e-06	down				HOVUSG2356800	2.658	7.24808e-30	up				HOVUSG2650000	-2.041	0.00199159	down				HOVUSG2555800	-1.306	0.00119056	down
HOVUSG2539400	2.679	6.2615e-05	up				HOVUSG3279800	-10.436	4.66868e-15	down				HOVUSG3143100	7.114	1.1772e-08	up				HOVUSG2357100	-8.111	2.67589e-08	down				HOVUSG2651600	-1.158	2.45854e-05	down				HOVUSG2563000	1.843	3.31324e-10	up
HOVUSG2542900	1.181	0.00824146	up				HOVUSG3282900	11.902	6.00046e-20	up				HOVUSG3145100	1.234	0.0151313	up				HOVUSG2357500	-9.721	2.28484e-13	down				HOVUSG2658300	4.738	0.00992319	up				HOVUSG2563100	2.337	1.56578e-08	up
HOVUSG2544400	3.562	0.00248449	up				HOVUSG3289300	-1.818	0.00585756	down				HOVUSG3147900	1.581	0.00214231	up				HOVUSG2357600	-5.394	0.0232196	down				HOVUSG2662700	3.726	0.00531374	up				HOVUSG2567100	-7.291	2.79946e-17	down
HOVUSG2546400	1.55	1.52085e-05	up				HOVUSG3289400	-6.322	0.00383344	down				HOVUSG3148500	-1.343	0.0453679	down				HOVUSG2359400	-2.863	0.000134068	down				HOVUSG2663200	1.684	0.0208692	up				HOVUSG2570700	2.742	7.68803e-10	up
HOVUSG2553900	1.983	4.01521e-08	up				HOVUSG3291500	-6.609	0.00112864	down				HOVUSG3156000	5.579	0.028445	up				HOVUSG2360700	1.853	0.0197862	up				HOVUSG2663300	-1.731	0.00975916	down				HOVUSG2571200	6.188	0.00239939	up
HOVUSG2555600	10.25	7.51457e-15	up				HOVUSG3293100	-1.751	0.000126103	down				HOVUSG3163400	3.484	0.01797	up				HOVUSG2365000	1.189	0.0015678	up				HOVUSG2665100	-1.597	0.024034	down				HOVUSG2573400	1.124	0.0301963	up
HOVUSG2555800	-1.182	0.0132085	down				HOVUSG3294900	-2.216	0.00105105	down				HOVUSG3172600	1.841	0.012505	up				HOVUSG2373600	2.482	0.0203056	up				HOVUSG2672800	-1.298	0.00210896	down				HOVUSG2574200	-6.866	0.000468316	down
HOVUSG2558600	-1.652	4.05002e-07	down				HOVUSG3295800	-1.022	0.0396373	down				HOVUSG3181100	-2.483	0.0131448	down				HOVUSG2378900	2.005	0.0243428	up				HOVUSG2674400	2.546	0.000220147	up				HOVUSG2574300	-6.403	0.00133908	down
HOVUSG2558900	-12.76	9.28166e-24	down				HOVUSG3296200	-3.378	1.78974e-09	down				HOVUSG3184800	-8.706	6.72702e-10	down				HOVUSG2379500	1.404	0.000240292	up				HOVUSG2676200	-4.454	7.57894e-39	down				HOVUSG2577100	-1.333	2.38853e-05	down
HOVUSG2559000	-11.778	1.98906e-20	down				HOVUSG3296700	3.413	2.37989e-10	up				HOVUSG3184900	-6.342	0.00088103	down				HOVUSG2379700	2.238	0.00174274	up				HOVUSG2677400	1.006	0.0464018	up				HOVUSG2577900	4.251	0.00702244	up
HOVUSG2560700	-1.282	0.030217	down				HOVUSG3298200	-1.733	9.14986e-05	down				HOVUSG3186200	-7.407	3.12142e-06	down				HOVUSG2383000	-1.329	0.0292335	down				HOVUSG2679100	3.2	6.29214e-06	up				HOVUSG2578000	5.389	0.00154008	up
HOVUSG2561400	-1.227	0.0275923	down				HOVUSG3298400	-2.452	7.43794e-06	down				HOVUSG3186300	-9.997	4.6061e-14	down				HOVUSG2384600	3.667	0.000131026	up				HOVUSG2681400	-3.037	0.0335618	down				HOVUSG2580900	-6.468	0.000977044	down
HOVUSG2564500	1.302	2.61025e-06	up				HOVUSG3298500	1.693	0.00066311	up				HOVUSG3192400	1.046	0.00919703	up				HOVUSG2384800	-2.355	1.8404e-11	down				HOVUSG2703200	2.513	0.00555051	up				HOVUSG2581000	-8.064	1.2009e-07	down
HOVUSG2564800	-2.14	7.72862e-08	down				HOVUSG3304500	-2.574	3.43714e-05	down				HOVUSG3192900	2.061	0.0362633	up				HOVUSG2388900	-2.214	0.000387952	down				HOVUSG2709600	-4.311	9.79779e-05	down				HOVUSG2583400	3.52	0.00404133	up
HOVUSG2567100	-7.368	3.31299e-10	down				HOVUSG3305800	-1.517	1.63501e-09	down				HOVUSG3195400	-1.114	0.0192817	down				HOVUSG2389000	-1.117	0.00354872	down				HOVUSG2709800	4.168	0.027259	up				HOVUSG2584100	1.595	0.00215336	up
HOVUSG2569800	-1.164	0.00336599	down				HOVUSG3306400	2.281	0.000598843	up				HOVUSG3200700	1.064	0.0250753	up				HOVUSG2389100	1.293	0.000122357	up				HOVUSG2710600	-1.288	0.00783269	down				HOVUSG2584900	-1.461	0.0112123	down
HOVUSG2573400	-1.344	0.000598699	down				HOVUSG3306600	-1.477	0.0398242	down				HOVUSG3201800	1.186	5.53514e-06	up				HOVUSG2391800	-1.909	7.53962e-08	down				HOVUSG2713900	-2.141	3.76852e-06	down				HOVUSG2585800	4.35	1.05926e-08	up
HOVUSG2574200	-7.764	9.01907e-07	down				HOVUSG3307800	-2.963	0.000697463	down				HOVUSG3211800	10.946	6.03205e-17	up				HOVUSG2399900	-1.374	0.0309197	down				HOVUSG2714100	1.496	0.00281144	up				HOVUSG2586300	1.915	0.0167933	up
HOVUSG2574300	-7.76	1.81399e-07	down				HOVUSG3308600	1.132	0.000265481	up				HOVUSG3212100	9.555	6.06423e-12	up				HOVUSG2409300	1.081	0.0277873	up				HOVUSG2716300	1.483	0.00628522	up				HOVUSG2587900	1.204	0.0388244	up
HOVUSG2576600	-5.142	0.0369053	down				HOVUSG3308700	-7.931	3.69827e-07	down				HOVUSG3213200	10.626	2.31318e-16	up				HOVUSG2411500	1.995	0.0158989	up				HOVUSG2719600	5.834	0.013941	up				HOVUSG2588800	-2.138	0.00429962	down
HOVUSG2578300	-5.494	1.64648e-27	down				HOVUSG3309100	-3.312	1.45067e-15	down				HOVUSG3215600	-1.079	0.000219973	down				HOVUSG2411900	-1.377	0.00709694	down				HOVUSG2719800	10.62	2.83838e-15	up				HOVUSG2591700	1.131	0.00131773	up
HOVUSG2579600	1.045	0.000347051	up				HOVUSG3314600	-9.509	5.20443e-12	down				HOVUSG3218400	1.394	0.00276813	up				HOVUSG2421000	-3.23	0.00206814	down				HOVUSG2720800	8.542	4.84234e-09	up				HOVUSG2592400	-1.405	7.7236e-05	down
HOVUSG2581000	-8.537	2.78011e-09	down				HOVUSG3330600	4.986	0.00111466	up				HOVUSG3226600	1.322	0.0437234	up				HOVUSG2421100	-1.494	0.000410917	down				HOVUSG2721600	3.309	0.00199159	up				HOVUSG2593100	2.11	0.0224692	up
HOVUSG2586200	-1.997	9.21168e-13	down				HOVUSG3332000	-3.929	3.24458e-22	down				HOVUSG3226700	2.196	0.0276452	up				HOVUSG2423800	-1.487	2.10614e-06	down				HOVUSG2721800	-1.914	0.000103388	down				HOVUSG2594900	2.531	0.01732	up
HOVUSG2588800	5.726	1.34161e-07	up				HOVUSG3333100	-2.705	0.000891668	down				HOVUSG3227300	-3.265	0.0173988	down				HOVUSG2431800	2.59	0.0150249	up				HOVUSG2721900	7.687	2.44494e-05	up				HOVUSG2595300	-1.236	0.032788	down
HOVUSG2590900	-1.212	0.0377225	down				HOVUSG3333400	5.282	0.000160655	up				HOVUSG3228500	-2.435	4.46623e-19	down				HOVUSG2432000	-1.968	0.0397477	down				HOVUSG2722800	3.579	0.00341881	up				HOVUSG2598000	1.245	0.000436411	up
HOVUSG2594900	1.004	0.00867337	up				HOVUSG3333800	-3.335	0.0208572	down				HOVUSG3228700	-1.64	8.70235e-09	down				HOVUSG2433600	-1.166	2.29199e-08	down				HOVUSG2723100	-1.086	0.0002986	down				HOVUSG2598300	-1.599	0.0126479	down
HOVUSG2598300	-2.763	1.44513e-12	down				HOVUSG3337900	1.261	3.59399e-05	up				HOVUSG3228800	1.056	0.000152868	up				HOVUSG2434300	-1.835	0.00300916	down				HOVUSG2728300	1.339	0.0192105	up				HOVUSG2598900	-1.943	0.00491232	down
HOVUSG2601000	-1.343	5.03106e-05	down				HOVUSG3338100	-2.38	0.00643364	down				HOVUSG3229300	-5.208	3.8338e-08	down				HOVUSG2438700	-1.299	0.0154122	down				HOVUSG2729100	-6.72	0.000485996	down				HOVUSG2607700	1.66	6.06044e-06	up
HOVUSG2602100	1.12	0.00398687	up				HOVUSG3339600	3.374	2.60081e-22	up				HOVUSG3230500	-7.642	6.60511e-07	down				HOVUSG2441800	-1.668	0.000207359	down				HOVUSG2729200	4.899	0.00712819	up				HOVUSG2607800	2.961	0.0463004	up
HOVUSG2603700	1.724	0.000219423	up				HOVUSG3340100	8.905	3.68567e-12	up				HOVUSG3231200	2.325	0.00995537	up				HOVUSG2442300	-1.253	0.000900835	down				HOVUSG2730300	-1.943	3.35399e-07	down				HOVUSG2608500	1.713	3.03857e-08	up
HOVUSG2607800	4.6	2.11428e-17	up				HOVUSG3340600	1.338	0.0266124	up				HOVUSG3231800	2.129	7.59091e-05	up				HOVUSG2443500	-2.298	0.0214377	down				HOVUSG2731600	-1.306	0.00247124	down				HOVUSG2615200	1.323	0.00154008	up
HOVUSG2614500	-1.162	0.000157754	down				HOVUSG3341000	-1.125	0.0108942	down				HOVUSG3237400	-9.886	1.21016e-13	down				HOVUSG2446200	-1.205	0.000832546	down				HOVUSG2731900	4.687	0.00162637	up				HOVUSG2615700	4.07	0.0168136	up
HOVUSG2617100	-1.202	9.96749e-09	down				HOVUSG3345800	-6.835	0.000716506	down				HOVUSG3239300	1.017	0.00243002	up				HOVUSG2456700	2.227	0.00073418	up				HOVUSG2733400	-8.514	4.15142e-08	down				HOVUSG2616500	1.536	0.0363118	up
HOVUSG2620900	10.191	6.09639e-15	up				HOVUSG3346000	-1.388	0.00363709	down				HOVUSG3241200	7.131	6.96726e-05	up				HOVUSG2460000	2.82	1.77029e-09	up				HOVUSG2733500	3.301	1.84964e-10	up				HOVUSG2621200	1.23	0.00271597	up
HOVUSG2622400	1.715	0.0484616	up				HOVUSG3347900	-2.064	0.000267754	down				HOVUSG3242300	5.104	2.08609e-15	up				HOVUSG2461400	1.206	0.000600309	up				HOVUSG2733700	3.481	0.00302727	up				HOVUSG2627100	6.25	0.00256862	up
HOVUSG2622800	2.182	1.87999e-14	up				HOVUSG3356300	4.768	0.018525	up				HOVUSG3249900	-4.111	0.0123052	down				HOVUSG2462200	1.66	0.000545848	up				HOVUSG2735100	1.685	0.00947283	up				HOVUSG2632200	-1.983	1.28471e-05	down
HOVUSG2624100	-1.296	0.0452529	down				HOVUSG3358000	-2.109	6.21366e-05	down				HOVUSG3253700	-1.746	0.000154716	down				HOVUSG2463900	1.09	0.04624	up				HOVUSG2737000	1.542	6.63873e-05	up				HOVUSG2633300	1.59	0.00180971	up
HOVUSG2624400	2.834	0.0254012	up				HOVUSG3359900	-2.685	7.02603e-06	down				HOVUSG3255900	-1	0.0473909	down				HOVUSG2464100	-7.287	7.197e-07	down				HOVUSG2737500	1.524	0.00125136	up				HOVUSG2633800	-1.95	6.83526e-06	down
HOVUSG2624700	1.043	0.00061523	up				HOVUSG3362300	-2.981	1.95287e-13	down				HOVUSG3266400	6.508	0.000959501	up				HOVUSG2465100	-1.608	0.000642798	down				HOVUSG2741600	6.617	0.000462314	up				HOVUSG2635000	5.901	0.00809195	up
HOVUSG2626600	-4.397	8.87743e-22	down				HOVUSG3374700	-2.028	3.79379e-05	down				HOVUSG3268300	-1.23	0.000300381	down				HOVUSG2465400	-1.709	5.95395e-05	down				HOVUSG2743800	-1.303	0.00800433	down				HOVUSG2635200	1.627	0.000593691	up
HOVUSG2626700	-4.159	3.46769e-11	down				HOVUSG3377600	-1.002	0.020954	down				HOVUSG3290200	1.034	0.00173341	up				HOVUSG2473300	5.956	0.00417121	up				HOVUSG2745600	-10.851	2.4592e-16	down				HOVUSG2635300	1.887	0.00128089	up
HOVUSG2629900	1.291	4.4912e-08	up				HOVUSG3380200	-1.523	0.000996366	down				HOVUSG3298400	1.159	0.0021227	up				HOVUSG2475500	2.34	0.00208285	up				HOVUSG2758400	2.449	5.71652e-10	up				HOVUSG2643300	-1.696	0.000816982	down
HOVUSG2632300	-2.085	4.04015e-15	down				HOVUSG3385200	1.332	0.000830727	up				HOVUSG3305900	1.57	0.0390295	up				HOVUSG2478600	1.393	5.66007e-05	up				HOVUSG2760300	1.394	0.0342324	up				HOVUSG2645200	1.425	0.00160088	up
HOVUSG2632400	-5.092	0.037864	down				HOVUSG3386100	1.566	1.08903e-05	up				HOVUSG3306400	-1.045	0.00294066	down				HOVUSG2478700	-1.398	0.000237717	down				HOVUSG2765700	-2.404	0.0117804	down				HOVUSG2650000	-2.201	1.357e-05	down
HOVUSG2633300	-10.668	1.38534e-16	down				HOVUSG3387800	-3.228	1.10752e-09	down				HOVUSG3307600	2.965	0.00477625	up				HOVUSG2478900	-1.094	2.3819e-06	down				HOVUSG2769400	8.328	1.5786e-23	up				HOVUSG2652000	-1.122	0.0336198	down
HOVUSG2634700	1.999	5.6428e-06	up				HOVUSG3390100	1.358	3.59793e-08	up				HOVUSG3308700	-7.208	9.84021e-06	down				HOVUSG2479500	1.964	2.54328e-10	up				HOVUSG2770500	4.067	2.76205e-09	up				HOVUSG2662700	3.008	0.0373562	up
HOVUSG2637500	5.684	0.0204433	up				HOVUSG3404500	-1.09	0.000423308	down				HOVUSG3309100	-2.639	8.67285e-18	down				HOVUSG2480400	-1.525	5.00512e-05	down				HOVUSG2772900	2.657	6.66139e-06	up				HOVUSG2663200	1.661	0.0186787	up
HOVUSG2641200	-1.117	0.0420736	down				HOVUSG3410600	5.74	0.0315596	up				HOVUSG3312600	1.961	0.0463651	up				HOVUSG2481300	1.763	0.040865	up				HOVUSG2775900	-6.296	0.00305328	down				HOVUSG2663300	-1.868	0.0138541	down
HOVUSG2641300	7.54	3.46084e-07	up				HOVUSG3412600	-4.534	1.44429e-50	down				HOVUSG3314900	2.359	0.00707624	up				HOVUSG2483200	1.386	0.0305113	up				HOVUSG2778100	-1.639	0.00975916	down				HOVUSG2665100	-2.773	7.36089e-07	down
HOVUSG2641400	9.384	7.49044e-11	up				HOVUSG3412900	-1.215	6.57108e-05	down				HOVUSG3315500	2.268	0.0262848	up				HOVUSG2484600	-1.229	0.011001	down				HOVUSG2787800	1.456	0.0355293	up				HOVUSG2668200	2.244	0.00193645	up
HOVUSG2643300	2.034	0.00185639	up				HOVUSG3415500	2.964	4.16802e-21	up				HOVUSG3320800	1.39	0.00222007	up				HOVUSG2485600	7.415	2.62028e-06	up				HOVUSG2788200	1.062	0.00145776	up				HOVUSG2668400	2.426	0.00645893	up
HOVUSG2645400	1.111	0.0308255	up				HOVUSG3424000	4.206	0.0409049	up				HOVUSG3324300	8.091	5.94722e-08	up				HOVUSG2487200	-11.496	2.77659e-19	down				HOVUSG2789300	1.596	0.00158491	up				HOVUSG2672800	-1.4	7.80501e-05	down
HOVUSG2648700	-1.612	0.030438	down				HOVUSG3424900	1.006	0.000478385	up				HOVUSG3330900	1.275	0.0298461	up				HOVUSG2488900	-1.155	0.00508388	down				HOVUSG2790100	-9.87	4.99881e-13	down				HOVUSG2674400	2.204	8.98162e-06	up
HOVUSG2652400	-1.165	0.000110871	down				HOVUSG3425300	-1.688	0.00773269	down				HOVUSG3332000	-4.459	1.8316e-33	down				HOVUSG2492400	1.516	0.00140768	up				HOVUSG2790200	-10.655	1.23522e-14	down				HOVUSG2678900	-1.189	0.00170693	down
HOVUSG2653900	1.192	0.0014841	up				HOVUSG3430600	-2.673	0.0150049	down				HOVUSG3332900	-8.336	7.16546e-09	down				HOVUSG2493300	-1.945	4.46289e-11	down				HOVUSG2793200	3.281	0.0337451	up				HOVUSG2679100	3.302	3.48895e-07	up
HOVUSG2662500	-1.461	0.000377817	down				HOVUSG3433700	1.435	0.0497508	up				HOVUSG3333100	-7.402	4.28676e-06	down				HOVUSG2495600	2.043	0.0265765	up				HOVUSG2800000	-6.213	0.00637733	down				HOVUSG2702900	-3.098	0.0144196	down
HOVUSG2672900	-1.315	3.45671e-10	down				HOVUSG3435400	-1.001	0.0424066	down				HOVUSG3333200	-8.797	4.72771e-10	down				HOVUSG2496900	-5.213	0.045066	down				HOVUSG2806300	2.168	0.000909148	up				HOVUSG2703500	2.026	0.0112994	up
HOVUSG2676200	-5.648	1.48639e-93	down				HOVUSG3441900	1.452	0.0360617	up				HOVUSG3334100	-3.278	1.48991e-22	down				HOVUSG2505400	-6.306	0.00983323	down				HOVUSG2806500	1.886	0.0114773	up				HOVUSG2713900	-2.18	3.68122e-06	down
HOVUSG2677200	-1.48	2.30116e-10	down				HOVUSG3442800	-1.18	0.0308228	down				HOVUSG3334500	-7.52	5.7662e-06	down				HOVUSG2505700	-1.357	1.40296e-05	down				HOVUSG2807200	5.627	0.0255712	up				HOVUSG2714800	2.849	0.0237977	up
HOVUSG2679100	1.992	0.000347075	up				HOVUSG3457500	-1.23	0.049702	down				HOVUSG3335300	-1.249	0.0237831	down				HOVUSG2509500	-1.162	0.0300479	down				HOVUSG2807600	8.853	5.36238e-10	up				HOVUSG2716400	1.952	2.67833e-10	up
HOVUSG2679900	5.304	0.0294588	up				HOVUSG3460100	-5.415	7.11154e-21	down				HOVUSG3337300	5.801	0.0471191	up				HOVUSG2512100	-1.198	0.0224327	down				HOVUSG2819100	1.753	9.05535e-05	up				HOVUSG2716500	-1.272	0.0200959	down
HOVUSG2680400	-1.072	0.032103	down				HOVUSG3460900	1.202	0.0322648	up				HOVUSG3337700	6.7	0.000275022	up				HOVUSG2514700	-1.097	0.00347883	down				HOVUSG2822700	-1.83	0.0490015	down				HOVUSG2717000	2.003	0.00806513	up
HOVUSG2687600	-2.029	0.033545	down				HOVUSG3467500	1.377	0.00743571	up				HOVUSG3340100	3.898	2.00632e-65	up				HOVUSG2522300	-1.496	0.00558871	down				HOVUSG2823100	-1.468	0.0169891	down				HOVUSG2717600	5.963	0.00576433	up
HOVUSG2690800	1.567	0.0212784	up				HOVUSG3471500	-1.023	0.0448954	down				HOVUSG3344500	1.453	0.0100218	up				HOVUSG2522600	-1.444	2.9027e-06	down				HOVUSG2826900	-6.689	1.16775e-40	down				HOVUSG2720900	3.08	0.000717034	up
HOVUSG2693900	-5.778	0.00900325	down				HOVUSG3471800	12.124	3.4783e-21	up				HOVUSG3345100	8.11	1.11595e-37	up				HOVUSG2522700	-1.498	0.000103457	down				HOVUSG2827400	-3.865	0.00444387	down				HOVUSG2721800	-6.919	3.36534e-19	down
HOVUSG2697900	-2.186	0.0177852	down				HOVUSG3472200	-1.233	0.0290089	down				HOVUSG3346000	1.356	0.0115557	up				HOVUSG2523600	-2.641	0.0397872	down				HOVUSG2844300	5.169	5.66239e-12	up				HOVUSG2728300	1.385	0.00545591	up
HOVUSG2698500	4.614	0.0112335	up				HOVUSG3478400	-1.387	3.47846e-05	down				HOVUSG3347900	2.23	0.0121878	up				HOVUSG2523700	1.448	9.24571e-16	up				HOVUSG2847500	2.157	2.41705e-08	up				HOVUSG2729100	-4.834	0.00961963	down
HOVUSG2701400	6.851	8.95775e-05	up				HOVUSG3491200	-1.623	0.0265373	down				HOVUSG3351400	5.625	0.033074	up				HOVUSG2524200	6.359	8.59025e-16	up				HOVUSG2848100	-6.964	0.000121475	down				HOVUSG2729200	5.039	0.00767404	up
HOVUSG2702100	-1.085	0.00347754	down				HOVUSG3491500	-1.053	0.0265039	down				HOVUSG3351900	-7.277	6.67042e-06	down				HOVUSG2524300	7.532	1.59696e-07	up				HOVUSG2862600	1.145	0.0250703	up				HOVUSG2730100	1.936	0.00672199	up
HOVUSG2709600	-2.954	1.53462e-05	down				HOVUSG3491800	-10.051	5.46609e-13	down				HOVUSG3358000	3.284	0.000111767	up				HOVUSG2525800	-1.371	4.8649e-05	down				HOVUSG2864800	-2.248	0.00950408	down				HOVUSG2730300	-2.151	3.01365e-09	down
HOVUSG2711800	1.511	0.00584164	up				HOVUSG3492400	-1.124	0.020771	down				HOVUSG3359200	2.566	0.000803532	up				HOVUSG2527100	-1.074	1.34997e-07	down				HOVUSG2867000	2.13	0.000400723	up				HOVUSG2730500	1.326	0.0400339	up
HOVUSG2714800	-1.098	9.94124e-05	down				HOVUSG3494700	-2.125	2.58419e-05	down				HOVUSG3359800	1.996	0.000503174	up				HOVUSG2527600	-5.592	0.0148855	down				HOVUSG2875200	2.52	0.0318381	up				HOVUSG2731600	-1.211	0.000577037	down
HOVUSG2717000	-1.662	0.00308132	down				HOVUSG3495900	12.61	5.39639e-23	up				HOVUSG3369300	3.208	0.0098255	up				HOVUSG2527800	-1.624	0.000449053	down				HOVUSG2880000	4.837	1.59402e-06	up				HOVUSG2732200	1.26	0.0440861	up
HOVUSG2717300	-2.394	0.000383266	down				HOVUSG3500500	-1.631	0.0338694	down				HOVUSG3373200	1.035	0.000134522	up				HOVUSG2528700	-1.082	0.00212905	down				HOVUSG2880300	-1.509	0.00432095	down				HOVUSG2733400	-8.424	4.96307e-08	down
HOVUSG2717600	9.019	3.40568e-11	up				HOVUSG3508400	-7.406	8.06565e-07	down				HOVUSG3381800	1.33	0.00299939	up				HOVUSG2528800	4.727	2.09799e-10	up				HOVUSG2881800	-3.179	0.044286	down				HOVUSG2736300	9.575	3.58583e-12	up
HOVUSG2720800	8.292	9.84298e-09	up				HOVUSG3508700	-1.611	0.00230218	down				HOVUSG3383300	-5.468	4.1452e-07	down				HOVUSG2531400	-2.063	0.000577619	down				HOVUSG2888800	-3.668	0.0197872	down				HOVUSG2736400	7.581	1.41483e-06	up
HOVUSG2726100	-3.944	0.00447992	down				HOVUSG3515700	-6.78	0.0008254	down				HOVUSG3383400	-7.979	1.58438e-07	down				HOVUSG2534800	-2.607	0.000951498	down				HOVUSG2889500	-1.848	0.000612594	down				HOVUSG2737000	1.507	0.00136461	up
HOVUSG2728000	3.123	0.0443831	up				HOVUSG3516600	1.153	0.0149514	up				HOVUSG3395800	-2.463	0.00511693	down				HOVUSG2534900	-8.195	1.79499e-08	down				HOVUSG2892500	10.879	2.13396e-16	up				HOVUSG2737500	1.611	0.000944216	up
HOVUSG2728300	2.744	1.24341e-25	up				HOVUSG3518600	5.695	0.00509516	up				HOVUSG3403900	6.261	0.0026151	up				HOVUSG2535100	3.135	2.67082e-06	up				HOVUSG2900900	-1.94	0.00840513	down				HOVUSG2738800	3.224	4.34575e-06	up
HOVUSG2728400	1.076	7.74889e-05	up				HOVUSG3518700	5.617	0.0417193	up				HOVUSG3404300	-1.701	1.31882e-05	down				HOVUSG2535200	4.97	7.03625e-17	up				HOVUSG2901200	-6.173	0.00714061	down				HOVUSG2740100	-2.452	0.0469749	down
HOVUSG2728800	2.032	5.31564e-13	up				HOVUSG3524300	-1.691	0.0297504	down				HOVUSG3404500	1.02	0.0109787	up				HOVUSG2535300	3.147	2.72404e-11	up				HOVUSG2905500	-9.113	9.85063e-11	down				HOVUSG2741600	6.691	0.000339457	up
HOVUSG2730900	1.127	0.026984	up				HOVUSG3525500	1.492	3.2814e-06	up				HOVUSG3411500	-1.404	0.0412402	down				HOVUSG2536500	-1.197	2.92666e-05	down				HOVUSG2905600	1.137	0.000154613	up				HOVUSG2744800	-1.835	1.01688e-05	down
HOVUSG2731000	2.291	0.000876551	up				HOVUSG3530800	-1.551	0.00955709	down				HOVUSG3412600	1.889	2.83875e-05	up				HOVUSG2538800	-6.033	0.007561	down				HOVUSG2906300	1.535	6.63759e-06	up				HOVUSG2758600	3.034	0.0344475	up
HOVUSG2731600	-1.322	2.0395e-06	down				HOVUSG3532500	7.064	0.000191304	up				HOVUSG3414000	3.409	0.00340534	up				HOVUSG2539200	2.941	1.63771e-10	up				HOVUSG2909000	1.722	0.00717856	up				HOVUSG2761800	1.511	0.046681	up
HOVUSG2732200	1.105	0.0141043	up				HOVUSG3537700	6.813	2.82013e-35	up				HOVUSG3414800	2.029	0.0223245	up				HOVUSG2539700	-4.423	0.000644275	down				HOVUSG2911700	1.396	0.00195541	up				HOVUSG2765700	-2.299	0.0194544	down
HOVUSG2733400	-9.773	2.85776e-13	down				HOVUSG3542900	1.93	0.0105605	up				HOVUSG3419200	6.921	0.000448076	up				HOVUSG2540600	1.545	0.000235478	up				HOVUSG2913800	-1.111	0.00382242	down				HOVUSG2770500	4.123	1.18408e-09	up
HOVUSG2733500	-1.685	0.000859214	down				HOVUSG3547900	7.029	3.40591e-09	up				HOVUSG3420900	1.279	0.00289143	up				HOVUSG2540700	1.012	0.00032034	up				HOVUSG2914800	3.427	0.000120192	up				HOVUSG2772900	1.707	0.011658	up
HOVUSG2733700	-2.399	1.25893e-05	down				HOVUSG3551100	-6.116	1.58573e-10	down				HOVUSG3423700	-1.586	2.44237e-11	down				HOVUSG2542900	-1.262	0.00747586	down				HOVUSG2915400	-1.007	0.00601076	down				HOVUSG2775900	-6.209	0.00302164	down
HOVUSG2736600	-1.41	0.00773972	down				HOVUSG3552100	-1.153	0.0245001	down				HOVUSG3424000	5.742	0.0486292	up				HOVUSG2547000	4.316	0.0102984	up				HOVUSG2920500	1.152	0.000788097	up				HOVUSG2778100	-1.173	0.0424542	down
HOVUSG2737500	-1.19	8.99358e-05	down				HOVUSG3557400	-1.402	0.0326204	down				HOVUSG3425300	-6.152	2.11454e-05	down				HOVUSG2553900	2.52	2.88862e-14	up				HOVUSG2925400	1.223	0.0288934	up				HOVUSG2789300	-2.115	0.00041327	down
HOVUSG2740100	-7.033	1.77091e-05	down				HOVUSG3567800	3.535	1.68305e-11	up				HOVUSG3425400	6.495	0.00138559	up				HOVUSG2555600	10.581	6.51557e-16	up				HOVUSG2926100	2.573	5.49068e-06	up				HOVUSG2790100	-9.783	5.8643e-13	down
HOVUSG2741600	5.634	0.0102769	up				HOVUSG3570300	8.708	3.69346e-09	up				HOVUSG3431100	-2.026	1.19742e-11	down				HOVUSG2559300	-1.065	0.00668751	down				HOVUSG2927100	2.781	2.58563e-08	up				HOVUSG2790200	-10.569	1.60308e-14	down
HOVUSG2744000	-1.412	1.74456e-05	down				HOVUSG3581200	3.353	6.34083e-05	up				HOVUSG3431900	1.83	0.0401867	up				HOVUSG2563000	2.349	1.39935e-28	up				HOVUSG2935800	2.433	4.41753e-11	up				HOVUSG2798000	1.832	0.018536	up
HOVUSG2744600	1.095	0.0287123	up				HOVUSG3582300	-1.348	0.00601955	down				HOVUSG3432000	2.689	0.00100721	up				HOVUSG2563100	1.944	1.69761e-15	up				HOVUSG2944800	3.084	3.44182e-06	up				HOVUSG2802600	1.263	0.00176399	up
HOVUSG2745600	-11.793	1.43852e-20	down				HOVUSG3585600	-6.583	0.00122531	down				HOVUSG3433100	5.973	0.00675721	up				HOVUSG2564500	-1.303	0.00335174	down				HOVUSG2949800	-1.347	0.000215208	down				HOVUSG2806500	1.996	0.0016068	up
HOVUSG2754800	-1.347	6.23925e-05	down				HOVUSG3586700	-10.366	1.3328e-14	down				HOVUSG3434800	1.89	0.0167415	up				HOVUSG2566300	7.277	1.00071e-05	up				HOVUSG2951300	7.483	1.15211e-05	up				HOVUSG2811300	-4.759	0.0497458	down
HOVUSG2758400	-1.986	4.68931e-05	down				HOVUSG3586800	-9.232	6.35754e-11	down				HOVUSG3434900	-3.552	5.12421e-06	down				HOVUSG2566700	-1.578	2.72573e-10	down				HOVUSG2951400	-2.389	6.43095e-05	down				HOVUSG2814700	1.544	0.0279676	up
HOVUSG2762200	1.444	0.0316576	up				HOVUSG3587000	-12.373	1.57839e-20	down				HOVUSG3438000	-2.015	0.000125289	down				HOVUSG2567100	-7.395	2.03837e-18	down				HOVUSG2951500	-2.076	0.00170675	down				HOVUSG2823000	-1.947	0.0317638	down
HOVUSG2769400	11.121	1.84836e-17	up				HOVUSG3591800	8.677	9.62358e-14	up				HOVUSG3446000	1.146	3.13938e-05	up				HOVUSG2569800	-1.201	0.000180576	down				HOVUSG2951700	7.792	5.66658e-07	up				HOVUSG2823100	-11.721	6.86035e-25	down
HOVUSG2770000	-3.096	0.00118737	down				HOVUSG3592900	-1.338	0.016474	down				HOVUSG3449500	1.084	6.02186e-06	up				HOVUSG2571000	1.426	0.0273445	up				HOVUSG2952500	1.607	0.0162922	up				HOVUSG2823600	-3.122	0.000642227	down
HOVUSG2770500	6.92	8.28489e-23	up				HOVUSG3598500	-1.561	0.00718859	down				HOVUSG3449700	1.007	0.000891981	up				HOVUSG2572900	-1.159	2.69237e-12	down				HOVUSG2953100	1.935	0.0299836	up				HOVUSG2823700	1.149	2.43628e-05	up
HOVUSG2772300	-5.083	0.0443831	down				HOVUSG3598800	-3.185	1.98626e-05	down				HOVUSG3450300	1.056	0.00265575	up				HOVUSG2573300	-1.634	2.86828e-08	down				HOVUSG2960400	-9.404	1.25535e-11	down				HOVUSG2826400	1.31	0.00556258	up
HOVUSG2772700	8	4.14089e-07	up				HOVUSG3610700	8.259	4.80306e-08	up				HOVUSG3450400	-10.961	5.22179e-17	down				HOVUSG2573400	-1.773	6.81701e-05	down				HOVUSG2961200	-2.436	8.51934e-08	down				HOVUSG2826900	-7.775	9.24183e-32	down
HOVUSG2772900	-1.355	0.0101797	down				HOVUSG3611300	-1.143	0.0333459	down				HOVUSG3457500	1.753	0.000398683	up				HOVUSG2573600	-1.727	2.15274e-05	down				HOVUSG2961400	2.866	5.25353e-05	up				HOVUSG2827200	1.725	0.0034125	up
HOVUSG2778400	1.123	0.00139039	up				HOVUSG3611600	-1.44	0.0044769	down				HOVUSG3458300	1.069	0.00019577	up				HOVUSG2574200	-6.887	5.8963e-05	down				HOVUSG2961600	1.459	0.000788097	up				HOVUSG2827400	-4.411	0.000342206	down
HOVUSG2783800	1.075	0.0329874	up				HOVUSG3617800	-1.969	0.00010047	down				HOVUSG3465100	-1.92	0.00917094	down				HOVUSG2574300	-6.885	5.36811e-05	down				HOVUSG2964000	1.416	0.0454737	up				HOVUSG2832900	-7.023	9.24149e-08	down
HOVUSG2787300	6.826	0.000102849	up				HOVUSG3624900	-1.913	0.0324168	down				HOVUSG3470200	2.174	0.040124	up				HOVUSG2579400	1.047	2.63415e-05	up				HOVUSG2965600	-1.703	0.018803	down				HOVUSG2841100	-1.754	0.0405573	down
HOVUSG2790100	-10.401	4.18932e-15	down				HOVUSG3628900	-1.012	0.0190702	down				HOVUSG3470300	-1.287	0.000320972	down				HOVUSG2580900	-5.728	0.00835876	down				HOVUSG2968400	1.117	0.0382736	up				HOVUSG2842800	-4.355	1.23144e-22	down
HOVUSG2790200	-10.589	2.73451e-15	down				HOVUSG3634600	6.379	0.00292333	up				HOVUSG3471200	1.875	0.00103987	up				HOVUSG2581000	-8.429	7.8315e-09	down				HOVUSG2969200	-1.459	0.0375006	down				HOVUSG2843000	-1.107	0.0329228	down
HOVUSG2806300	-3.622	4.87831e-05	down				HOVUSG3635200	1.093	1.76968e-06	up				HOVUSG3471500	-2.079	0.000246966	down				HOVUSG2581500	-1.102	5.7521e-06	down				HOVUSG2971100	2.571	0.0126957	up				HOVUSG2843100	-1.823	3.38956e-06	down
HOVUSG2806500	1.365	0.00449367	up				HOVUSG3635300	6.162	2.1081e-12	up				HOVUSG3472200	1.481	0.00903389	up				HOVUSG2583500	1.658	8.04156e-05	up				HOVUSG2978600	4.199	5.2278e-19	up				HOVUSG2844300	3.716	0.00101547	up
HOVUSG2807200	9.49	1.82981e-12	up				HOVUSG3635500	-1.305	0.0328956	down				HOVUSG3473200	2.801	1.36407e-10	up				HOVUSG2584900	2.167	2.81337e-10	up				HOVUSG2978700	3.106	1.36559e-17	up				HOVUSG2847500	1.491	0.000188131	up
HOVUSG2807600	10.453	7.67058e-16	up				HOVUSG3636100	-5.492	0.0493873	down				HOVUSG3478400	1.451	4.85086e-05	up				HOVUSG2587100	-1.442	0.0127261	down				HOVUSG2980300	3.416	2.00543e-12	up				HOVUSG2848100	-6.877	0.000123357	down
HOVUSG2817300	1.062	0.00241393	up				HOVUSG3644000	2.937	0.0189642	up				HOVUSG3486500	1.17	0.00251197	up				HOVUSG2587700	1.424	0.00500447	up				HOVUSG2981900	-5.875	0.0219387	down				HOVUSG2851900	2.449	2.07182e-09	up
HOVUSG2819900	1.015	7.62735e-06	up				HOVUSG3644300	2.771	0.0229552	up				HOVUSG3491800	-10.999	4.43744e-17	down				HOVUSG2592400	1.774	7.30024e-05	up				HOVUSG2982500	1.461	0.0100673	up				HOVUSG2858200	-6.261	0.00284261	down
HOVUSG2824400	1.495	0.035181	up				HOVUSG3645400	2.393	3.58895e-11	up				HOVUSG3492400	1.577	0.0118241	up				HOVUSG2593300	6.551	1.84025e-05	up				HOVUSG2984400	-8.55	5.07042e-09	down				HOVUSG2859700	3.064	0.0126333	up
HOVUSG2826900	-8.634	3.55046e-33	down				HOVUSG3647900	-1.226	0.00540935	down				HOVUSG3493800	-1.393	0.00556028	down				HOVUSG2598300	-2.196	2.81364e-05	down				HOVUSG2984700	-7.308	1.72549e-05	down				HOVUSG2863800	-1.271	0.000230528	down
HOVUSG2827400	-2.683	1.53101e-10	down				HOVUSG3652500	1.255	0.0062664	up				HOVUSG3495900	7.051	0.0106724	up				HOVUSG2601100	1.208	1.12966e-06	up				HOVUSG2985000	-1.249	0.000266063	down				HOVUSG2864600	-1.127	0.0459897	down
HOVUSG2833400	-3.971	0.00183601	down				HOVUSG3653300	-1.324	0.0127272	down				HOVUSG3507500	-1.054	0.0228962	down				HOVUSG2606500	-4.191	0.0321354	down				HOVUSG2985400	7.084	6.21265e-05	up				HOVUSG2864800	-2.493	0.00946622	down
HOVUSG2841100	3.29	0.0133096	up				HOVUSG3657200	6.873	1.6606e-12	up				HOVUSG3508900	3.071	2.20811e-21	up				HOVUSG2607400	1.798	0.00107096	up				HOVUSG2987600	-1.007	0.00725853	down				HOVUSG2865600	1.423	0.0473218	up
HOVUSG2843000	-2.216	0.0121785	down				HOVUSG3678700	-1.432	0.00310004	down				HOVUSG3509100	-6.842	7.88818e-05	down				HOVUSG2607700	1.071	0.00567443	up				HOVUSG2987700	2.951	6.89004e-11	up				HOVUSG2867000	1.459	0.0257331	up
HOVUSG2843800	1.241	0.00761592	up				HOVUSG3681700	5.629	0.0443465	up				HOVUSG3509300	-1.496	3.12375e-05	down				HOVUSG2607900	2.009	0.000112447	up				HOVUSG2988400	-8.6	3.74586e-09	down				HOVUSG2875200	2.644	0.0240871	up
HOVUSG2844100	-1.157	0.000760974	down				HOVUSG3682000	-1.796	0.000699094	down				HOVUSG3510700	3.603	7.46233e-15	up				HOVUSG2609600	1.432	6.54394e-22	up				HOVUSG2989500	1.885	1.00566e-07	up				HOVUSG2877500	4.793	2.66112e-12	up
HOVUSG2845700	-2.298	0.00339355	down				HOVUSG3682800	-6.71	0.00271855	down				HOVUSG3511800	5.805	0.0185696	up				HOVUSG2611100	-5.918	0.00379055	down				HOVUSG2990400	-1.15	0.0038397	down				HOVUSG2879400	-1.023	0.00201248	down
HOVUSG2846100	-1.821	8.71858e-06	down				HOVUSG3684400	-2.77	0.00733839	down				HOVUSG3513700	6.568	0.000599456	up				HOVUSG2611900	-1.389	3.82895e-10	down				HOVUSG2994900	1.771	0.0451602	up				HOVUSG2880000	4.043	0.00112343	up
HOVUSG2848100	-8.779	2.18725e-10	down				HOVUSG3685600	1.051	0.00231204	up				HOVUSG3515200	-1.813	0.000744868	down				HOVUSG2614100	-2.479	1.86812e-06	down				HOVUSG3001100	-2.627	0.0354535	down				HOVUSG2880300	-1.584	0.000163204	down
HOVUSG2848200	1.067	5.59948e-07	up				HOVUSG3686500	-2.536	0.000472677	down				HOVUSG3516800	1.052	0.0124486	up				HOVUSG2615100	-3.204	0.000180777	down				HOVUSG3015200	6.961	7.23999e-05	up				HOVUSG2883300	-1.626	0.0282265	down
HOVUSG2849900	-2.356	2.49189e-05	down				HOVUSG3690700	1.825	0.000329893	up				HOVUSG3518200	2.153	0.025266	up				HOVUSG2624600	1.555	0.00467084	up				HOVUSG3032300	1.761	0.00212782	up				HOVUSG2889500	-2.694	2.06933e-09	down
HOVUSG2861000	1.19	0.00977742	up				HOVUSG3691000	1.081	0.00706536	up				HOVUSG3518600	5.675	1.29653e-06	up				HOVUSG2633300	1.298	0.000364064	up				HOVUSG3040300	1.582	0.0018819	up				HOVUSG2893100	-1.025	0.00144949	down
HOVUSG2864300	-5.993	0.00325052	down				HOVUSG3691200	-2.42	0.00926756	down				HOVUSG3518700	5.873	5.47338e-05	up				HOVUSG2635100	-1.177	0.0239813	down				HOVUSG3040600	1.402	0.000484693	up				HOVUSG2894700	3.33	0.00886149	up
HOVUSG2870800	1.16	0.00102568	up				HOVUSG3694200	-9.351	2.41061e-11	down				HOVUSG3522800	-8.845	1.87831e-10	down				HOVUSG2637900	-4.854	0.000172033	down				HOVUSG3040900	-3.254	7.31645e-08	down				HOVUSG2895800	-4.239	1.65402e-06	down
HOVUSG2870900	-4.205	0.000731874	down				HOVUSG3695800	4.622	0.0126651	up				HOVUSG3530800	1.649	6.00498e-05	up				HOVUSG2638300	-1.16	3.08001e-09	down				HOVUSG3042300	-1.581	0.00810538	down				HOVUSG2901200	-6.088	0.00740878	down
HOVUSG2879000	3.357	0.00395886	up				HOVUSG3696100	-3.858	1.95708e-18	down				HOVUSG3531200	-4.706	0.0447486	down				HOVUSG2641200	-1.246	0.041683	down				HOVUSG3044400	-1.412	0.00947283	down				HOVUSG2913100	-1.156	0.000149499	down
HOVUSG2888500	2.963	0.000871373	up				HOVUSG3697700	-2.072	1.06549e-06	down				HOVUSG3532500	5.537	0.0282012	up				HOVUSG2642100	2.04	0.0489604	up				HOVUSG3047300	-10.323	1.09801e-14	down				HOVUSG2913800	-1.199	0.000242567	down
HOVUSG2888800	-3.094	0.0112214	down				HOVUSG3709800	-1.817	0.00151681	down				HOVUSG3535200	-2.119	0.0417784	down				HOVUSG2644100	3.057	0.0113511	up				HOVUSG3048400	2.4	6.27974e-06	up				HOVUSG2914800	2.8	0.000710944	up
HOVUSG2889300	-1.048	0.0476975	down				HOVUSG3713200	-6.218	3.05747e-09	down				HOVUSG3537200	-1.235	0.000163195	down				HOVUSG2644400	6.486	0.000734945	up				HOVUSG3049700	-3.133	9.37938e-18	down				HOVUSG2915900	-1.566	0.0125738	down
HOVUSG2889900	-1.483	4.13262e-09	down				HOVUSG3718600	5.505	0.0150988	up				HOVUSG3537700	9.98	7.29542e-14	up				HOVUSG2652000	1.201	4.9178e-07	up				HOVUSG3052200	-2.804	0.00389294	down				HOVUSG2928900	-6.713	0.000362176	down
HOVUSG2890400	1.275	0.000136032	up				HOVUSG3718700	1.292	0.0103587	up				HOVUSG3539700	2.554	9.30375e-10	up				HOVUSG2657400	-1.006	0.0238888	down				HOVUSG3055200	-8.416	1.76617e-08	down				HOVUSG2942600	2.864	0.00356604	up
HOVUSG2891100	-1.137	0.0471993	down				HOVUSG3720700	6.42	0.00919901	up				HOVUSG3548000	4.041	0.000147648	up				HOVUSG2661100	-1.044	0.000452891	down				HOVUSG3056600	-2.214	4.38565e-13	down				HOVUSG2944800	2.719	8.98974e-05	up
HOVUSG2892500	11.23	5.93659e-09	up				HOVUSG3722200	-2.614	0.00911874	down				HOVUSG3551100	-5.099	0.00559127	down				HOVUSG2663200	-1.307	0.00276581	down				HOVUSG3059400	1.322	0.048859	up				HOVUSG2949800	-1.33	0.000107251	down
HOVUSG2893300	-1.182	0.0356082	down				HOVUSG3723000	1.365	8.15949e-05	up				HOVUSG3552100	1.251	0.000305199	up				HOVUSG2674400	2.758	0.00567328	up				HOVUSG3063700	1.725	0.0203257	up				HOVUSG2951200	-1.679	0.00938897	down
HOVUSG2895800	1.66	9.25336e-06	up				HOVUSG3723600	-1.362	0.0182525	down				HOVUSG3552700	-1.116	0.00369967	down				HOVUSG2677300	-1.32	0.000529111	down				HOVUSG3068200	-1.491	6.32649e-05	down				HOVUSG2951300	8.204	7.17739e-08	up
HOVUSG2904600	5.961	0.0390604	up				HOVUSG3724700	-2.223	2.84105e-14	down				HOVUSG3553500	-1.139	0.0025637	down				HOVUSG2680400	-2.018	0.0113195	down				HOVUSG3073200	-1.502	0.0280185	down				HOVUSG2951400	-1.955	8.80145e-07	down
HOVUSG2905400	-4.172	0.0252693	down				HOVUSG3724800	-3.238	8.35718e-17	down				HOVUSG3557400	1.952	6.22141e-05	up				HOVUSG2687500	-3.574	0.000177525	down				HOVUSG3073500	1.799	0.0156962	up				HOVUSG2951500	-1.714	0.00018469	down
HOVUSG2905500	-9.325	1.06912e-11	down				HOVUSG3725000	-1.536	8.95628e-06	down				HOVUSG3557900	-1.008	0.0131434	down				HOVUSG2688000	-1.541	7.27259e-08	down				HOVUSG3073800	-1.578	0.000987942	down				HOVUSG2951700	8.325	1.31873e-08	up
HOVUSG2905600	-1.172	0.000298602	down				HOVUSG3725100	-1.672	9.4073e-07	down				HOVUSG3560300	-1.52	0.00576457	down				HOVUSG2693900	-5.486	0.0197875	down				HOVUSG3076200	1.425	0.000985537	up				HOVUSG2952500	1.672	0.00154008	up
HOVUSG2909600	-1.109	9.13366e-08	down				HOVUSG3726000	-1.28	0.000343947	down				HOVUSG3560900	-2.076	0.048482	down				HOVUSG2702100	-1.895	1.223e-06	down				HOVUSG3080700	1.441	0.00112651	up				HOVUSG2952600	-1.641	0.0119698	down
HOVUSG2915400	-1.104	9.72426e-08	down				HOVUSG3728800	-1.506	0.00305099	down				HOVUSG3563400	1.483	0.0178815	up				HOVUSG2703200	-2.041	7.07659e-05	down				HOVUSG3085200	8.351	1.29939e-07	up				HOVUSG2955200	6.024	0.00491164	up
HOVUSG2918700	1.056	0.000867682	up				HOVUSG3731200	-1.085	0.0223724	down				HOVUSG3565600	2.141	0.000244499	up				HOVUSG2709200	1.042	3.64694e-06	up				HOVUSG3085700	-1.002	0.0198647	down				HOVUSG2960400	-9.317	1.46793e-11	down
HOVUSG2920200	-2.308	0.00111955	down				HOVUSG3735200	-10.472	2.17417e-15	down				HOVUSG3567800	3.307	8.79126e-25	up				HOVUSG2712200	4.413	0.0254808	up				HOVUSG3086200	1.978	4.09333e-09	up				HOVUSG2961200	-2.907	1.52054e-15	down
HOVUSG2924400	5.344	0.03865	up				HOVUSG3735700	-1.074	0.0480629	down				HOVUSG3570000	2.704	0.0090241	up				HOVUSG2716300	1.653	0.0397477	up				HOVUSG3087000	-8.646	3.04207e-09	down				HOVUSG2961600	1.846	1.2876e-05	up
HOVUSG2926100	1.438	0.000720125	up				HOVUSG3745600	-1.298	0.0455532	down				HOVUSG3570300	9.462	5.99589e-12	up				HOVUSG2716400	-1.345	1.08494e-06	down				HOVUSG3090600	-1.38	0.00140572	down				HOVUSG2964000	1.968	0.00118516	up
HOVUSG2931000	1.957	1.45664e-05	up				HOVUSG3749800	-3.835	0.0156675	down				HOVUSG3572200	-1.171	0.0152887	down				HOVUSG2717200	-1.695	1.07031e-14	down				HOVUSG3091600	-1.262	0.0475442	down				HOVUSG2965600	-1.513	0.00596628	down
HOVUSG2934300	-5.335	0.0246262	down				HOVUSG3752600	-1.053	0.0164196	down				HOVUSG3581300	1.168	0.0134554	up				HOVUSG2717600	5.035	6.59561e-07	up				HOVUSG3092000	1.198	0.00359112	up				HOVUSG2967500	-1.091	0.00112641	down
HOVUSG2934800	1.964	0.0398808	up				HOVUSG3753400	-1.801	0.00855632	down				HOVUSG3582300	1.39	0.000414243	up				HOVUSG2721800	-10.679	1.01285e-15	down				HOVUSG3093300	3.967	1.56983e-08	up				HOVUSG2968400	1.33	0.00925864	up
HOVUSG2937600	6.15	0.00198084	up				HOVUSG3759000	3.651	5.52362e-09	up				HOVUSG3586500	-2.646	2.03983e-06	down				HOVUSG2724300	-1.116	0.00366602	down				HOVUSG3093400	7.036	0.000100365	up				HOVUSG2968900	1.005	0.0344942	up
HOVUSG2938400	-1.822	0.00142855	down				HOVUSG3759400	2.292	0.0192947	up				HOVUSG3586700	-9.004	7.73832e-11	down				HOVUSG2724400	-1.12	0.00301525	down				HOVUSG3094000	1.071	0.0393355	up				HOVUSG2969100	1.119	0.0155166	up
HOVUSG2947900	-1.143	0.00859682	down				HOVUSG3768300	1.729	0.0409946	up				HOVUSG3586800	-8.343	7.82262e-09	down				HOVUSG2728300	1.385	0.00267833	up				HOVUSG3097800	2.26	9.66232e-05	up				HOVUSG2971500	-1.31	0.0237933	down
HOVUSG2949000	-1.324	6.04484e-05	down				HOVUSG3769100	6.415	0.0368235	up				HOVUSG3587000	-11.582	3.89073e-19	down				HOVUSG2729100	-4.835	1.10446e-05	down				HOVUSG3099600	-7.612	6.05819e-05	down				HOVUSG2971700	-6.109	0.0304289	down
HOVUSG2949400	1.289	0.000122814	up				HOVUSG3781400	-10.029	8.64824e-14	down				HOVUSG3587500	-4.523	0.0263695	down				HOVUSG2729500	1.291	0.000151561	up				HOVUSG3101000	1.361	0.0136182	up				HOVUSG2971900	-3.373	5.00398e-05	down
HOVUSG2949800	-1.217	1.10058e-05	down				HOVUSG3783600	3.118	0.00569024	up				HOVUSG3588600	-1.194	7.74046e-06	down				HOVUSG2729900	1.321	1.83708e-09	up				HOVUSG3101800	1.452	0.000758132	up				HOVUSG2978600	4.458	9.73925e-25	up
HOVUSG2949900	-6.726	0.000123785	down				HOVUSG3788300	-1.166	0.00648281	down				HOVUSG3594600	-12.088	4.14269e-21	down				HOVUSG2730300	-1.163	0.00215328	down				HOVUSG3102700	-1.046	0.0354535	down				HOVUSG2978700	2.942	1.05543e-15	up
HOVUSG2950300	6.242	0.00106244	up				HOVUSG3791400	-6.227	0.00409981	down				HOVUSG3604700	3.634	3.19822e-07	up				HOVUSG2730500	-1.181	0.00567592	down				HOVUSG3106000	1.749	1.14566e-07	up				HOVUSG2980300	2.202	8.22632e-06	up
HOVUSG2950800	-6.133	0.0011605	down				HOVUSG3794100	3.364	0.00018163	up				HOVUSG3605200	1.748	0.0261781	up				HOVUSG2731400	-1.841	0.000313641	down				HOVUSG3106100	1.226	0.000393838	up				HOVUSG2981900	-5.785	0.0223843	down
HOVUSG2951400	-1.824	9.52572e-05	down				HOVUSG3797000	1.588	8.54673e-05	up				HOVUSG3606700	-1.197	0.0020678	down				HOVUSG2731800	-5.689	3.77001e-05	down				HOVUSG3108700	1.594	0.00301081	up				HOVUSG2984400	-8.462	5.2896e-09	down
HOVUSG2951700	8.831	1.28439e-10	up				HOVUSG3800400	1.194	0.0488814	up				HOVUSG3610700	7.65	1.3541e-06	up				HOVUSG2732400	1.934	1.91046e-11	up				HOVUSG3110300	-2.819	0.00294696	down				HOVUSG2984700	-4.072	0.000652175	down
HOVUSG2952500	2.902	4.54982e-05	up				HOVUSG3806400	1.269	0.000763676	up				HOVUSG3611600	1.054	0.0447337	up				HOVUSG2733400	-7.569	4.96522e-06	down				HOVUSG3110400	1.338	0.00170675	up				HOVUSG2985400	8.095	1.00664e-07	up
HOVUSG2952600	-1.33	1.3293e-07	down				HOVUSG3818700	1.771	0.00639588	up				HOVUSG3616300	-2.693	1.75634e-09	down				HOVUSG2733600	1.181	6.69762e-06	up				HOVUSG3112300	-1.321	0.000102028	down				HOVUSG2985500	1.688	0.0474337	up
HOVUSG2954100	2.32	0.0191455	up				HOVUSG3821300	6.699	0.00136536	up				HOVUSG3617800	1.117	0.0232172	up				HOVUSG2734500	-3.434	0.046132	down				HOVUSG3113900	-2.705	8.11069e-06	down				HOVUSG2985900	1.126	0.019237	up
HOVUSG2955100	-2.081	0.00530172	down				HOVUSG3827800	-6.192	0.0146306	down				HOVUSG3619000	2.456	1.72791e-25	up				HOVUSG2735100	-2.411	4.24236e-08	down				HOVUSG3121300	4.014	1.15644e-08	up				HOVUSG2987700	3.335	4.55373e-28	up
HOVUSG2955300	-1.039	0.018502	down				HOVUSG3829900	-1.882	0.00126744	down				HOVUSG3619100	1.085	0.0158662	up				HOVUSG2735200	-3.247	1.12951e-11	down				HOVUSG3121700	-1.965	0.0474851	down				HOVUSG2988400	-8.512	3.93815e-09	down
HOVUSG2955600	-1.126	0.047389	down				HOVUSG3837600	-1.849	0.0134147	down				HOVUSG3619200	1.138	0.00526489	up				HOVUSG2735900	1.312	0.0149664	up				HOVUSG3124100	-2.084	2.11866e-10	down				HOVUSG2994700	-1.368	1.93604e-05	down
HOVUSG2959000	1.098	0.0177594	up				HOVUSG3837900	-1.929	0.000143923	down				HOVUSG3619500	1.927	0.028445	up				HOVUSG2736300	8.704	8.69422e-10	up				HOVUSG3127100	-7.465	8.60977e-06	down				HOVUSG2994900	2.233	0.000827646	up
HOVUSG2960400	-7.071	1.33397e-05	down				HOVUSG3838000	-6.273	1.55187e-05	down				HOVUSG3622300	-1.95	0.00494638	down				HOVUSG2736400	8.18	2.18081e-08	up				HOVUSG3128200	3.496	5.37345e-05	up				HOVUSG2996200	-1.503	0.0425934	down
HOVUSG2961200	-1.511	1.81089e-15	down				HOVUSG3838100	-2.13	9.6051e-05	down				HOVUSG3627700	-8.871	2.43023e-10	down				HOVUSG2738600	2.244	0.000811339	up				HOVUSG3129300	5.882	0.0104327	up				HOVUSG2996700	2.101	0.000194869	up
HOVUSG2961700	-2.166	0.00730833	down				HOVUSG3838200	-1.481	0.000789008	down				HOVUSG3635500	-4.132	1.3886e-10	down				HOVUSG2741600	6.67	0.000190824	up				HOVUSG3129700	-1.109	0.0467308	down				HOVUSG3000900	-2.414	0.000533472	down
HOVUSG2963000	1.052	0.00101622	up				HOVUSG3838300	-2.54	1.33753e-07	down				HOVUSG3636100	2.398	8.74198e-08	up				HOVUSG2750900	-1.216	3.53224e-08	down				HOVUSG3130100	2.161	0.000109665	up				HOVUSG3001100	-5.59	0.000805334	down
HOVUSG2966200	1.749	0.0230007	up				HOVUSG3838500	-2.836	2.60802e-16	down				HOVUSG3644000	-1.146	0.0196503	down				HOVUSG2755200	-1.48	1.86399e-05	down				HOVUSG3135000	2.678	2.21661e-05	up				HOVUSG3002100	-1.493	0.00499279	down
HOVUSG2966400	-1.024	0.000612532	down				HOVUSG3838700	-6.602	0.00146709	down				HOVUSG3644400	1.309	0.0187775	up				HOVUSG2760900	-2.75	0.00011764	down				HOVUSG3135300	1.97	0.0269171	up				HOVUSG3009600	1.566	0.0337798	up
HOVUSG2970100	-1.345	0.00369117	down				HOVUSG3838900	-10.112	1.18355e-13	down				HOVUSG3644600	-2.08	1.68805e-06	down				HOVUSG2763100	-1.774	0.0146967	down				HOVUSG3143100	9.05	1.29238e-10	up				HOVUSG3011900	-1.027	0.0194053	down
HOVUSG2973400	-6.317	0.00425603	down				HOVUSG3846800	-1.664	0.00101275	down				HOVUSG3644700	1.795	0.000402298	up				HOVUSG2763900	-1	3.82299e-09	down				HOVUSG3150200	2.11	1.03127e-06	up				HOVUSG3014600	2.572	0.0278078	up
HOVUSG2976800	-2.955	0.027975	down				HOVUSG3849400	1.74	0.0492255	up				HOVUSG3645400	1.741	2.1676e-06	up				HOVUSG2765700	-2.901	0.00210844	down				HOVUSG3150900	2.297	0.00107993	up				HOVUSG3015200	7.975	1.73229e-07	up
HOVUSG2978600	4.519	3.32912e-09	up				HOVUSG3855000	8.601	4.80359e-09	up				HOVUSG3648500	1.684	0.0294041	up				HOVUSG2768100	-1.01	0.00021865	down				HOVUSG3153600	2.111	0.0271753	up				HOVUSG3019600	-2.732	4.0942e-06	down
HOVUSG2978700	2.834	4.13713e-19	up				HOVUSG3856800	-2.53	7.38188e-08	down				HOVUSG3649800	-1.075	0.00189502	down				HOVUSG2770000	-1.263	0.0091776	down				HOVUSG3156000	6.533	0.000949676	up				HOVUSG3029300	6.543	0.00064369	up
HOVUSG2979500	-1.516	0.00113799	down				HOVUSG3857100	1.244	0.00856992	up				HOVUSG3653300	1.056	0.0213851	up				HOVUSG2770100	-6.561	0.00166826	down				HOVUSG3156600	1.72	0.000645003	up				HOVUSG3032300	1.89	0.000157768	up
HOVUSG2980200	-1.694	0.000695623	down				HOVUSG3857200	-2.639	8.32395e-09	down				HOVUSG3655100	3.285	2.36515e-05	up				HOVUSG2770500	5.031	1.7835e-27	up				HOVUSG3163400	3.473	0.00370207	up				HOVUSG3036300	1.133	0.0479883	up
HOVUSG2981200	-2.142	4.66695e-05	down				HOVUSG3857800	1.545	1.96935e-09	up				HOVUSG3657200	8.474	6.1767e-09	up				HOVUSG2780100	1.866	1.99159e-09	up				HOVUSG3172200	1.557	0.0229597	up				HOVUSG3036500	-1.957	0.00224789	down
HOVUSG2981400	-1.231	3.55119e-05	down				HOVUSG3858400	12.764	7.24133e-23	up				HOVUSG3660000	6.03	1.50958e-09	up				HOVUSG2785000	-1.664	1.93272e-13	down				HOVUSG3172600	2.14	0.00313833	up				HOVUSG3040300	1.335	0.00833259	up
HOVUSG2981900	-7.345	8.02619e-06	down				HOVUSG3858500	3.068	0.00146469	up				HOVUSG3660500	6.934	0.000205248	up				HOVUSG2785800	-1.524	1.84168e-10	down				HOVUSG3173300	6.411	0.00135097	up				HOVUSG3040600	1.339	0.000217212	up
HOVUSG2984000	-6.186	0.00245114	down				HOVUSG3858800	10.857	2.05922e-16	up				HOVUSG3660800	6.151	6.23087e-29	up				HOVUSG2790100	-9.979	1.63618e-13	down				HOVUSG3175400	1.277	0.000301767	up				HOVUSG3040900	-2.035	0.00267834	down
HOVUSG2984300	-7.3	6.42626e-06	down				HOVUSG3860800	2.062	0.000346693	up				HOVUSG3661600	-5.449	0.0406921	down				HOVUSG2790200	-10.729	5.01983e-16	down				HOVUSG3177800	7.217	2.32914e-05	up				HOVUSG3041500	-1.2	5.56059e-05	down
HOVUSG2984400	-4.305	1.14968e-11	down				HOVUSG3872000	-1.424	0.0041298	down				HOVUSG3669800	2.18	0.011113	up				HOVUSG2792300	-1.096	0.00366602	down				HOVUSG3178300	-1.009	0.00172405	down				HOVUSG3044000	1.794	0.00529985	up
HOVUSG2984700	-7.53	1.16413e-06	down				HOVUSG3874700	1.397	2.03226e-06	up				HOVUSG3671500	1.784	0.0144685	up				HOVUSG2793700	-1.138	0.0304426	down				HOVUSG3184800	-9.342	2.25036e-11	down				HOVUSG3045300	1.351	0.00196227	up
HOVUSG2985000	-2.125	1.78697e-15	down				HOVUSG3875400	1.621	0.00155501	up				HOVUSG3677700	2.367	1.50967e-05	up				HOVUSG2798000	-1.19	0.00961732	down				HOVUSG3185200	-2.245	0.0124603	down				HOVUSG3047400	-1.098	0.0146879	down
HOVUSG2988400	-9.335	2.88349e-12	down				HOVUSG3875800	1.599	0.037103	up				HOVUSG3678700	-1.331	0.000300893	down				HOVUSG2806200	-2.102	0.0016955	down				HOVUSG3186200	-6.35	0.00303264	down				HOVUSG3048400	2.246	1.88114e-05	up
HOVUSG2994700	-1.267	1.09212e-05	down				HOVUSG3877000	-1.288	0.00403491	down				HOVUSG3685100	-1.092	0.000750819	down				HOVUSG2806300	2.197	0.0130363	up				HOVUSG3186300	-9.67	2.43827e-12	down				HOVUSG3049700	-3.703	4.20986e-26	down
HOVUSG3002600	-1.019	0.000250234	down				HOVUSG3877200	-4.748	0.0140557	down				HOVUSG3685600	-1.103	0.0121693	down				HOVUSG2806500	-1.481	0.0155084	down				HOVUSG3191200	-1.057	0.0213124	down				HOVUSG3052200	-2.473	0.0266104	down
HOVUSG3020000	-1.382	3.97603e-06	down				HOVUSG3885700	2.994	0.0130817	up				HOVUSG3686300	-1.197	0.0328859	down				HOVUSG2806800	1.464	0.0485628	up				HOVUSG3191300	3.786	0.0171117	up				HOVUSG3056600	-1.387	8.66886e-05	down
HOVUSG3025200	1.585	0.0406086	up				HOVUSG3887400	-1.034	0.035739	down				HOVUSG3687100	-2.544	5.80817e-15	down				HOVUSG2809900	-1.058	1.22185e-06	down				HOVUSG3192400	1.02	0.0272853	up				HOVUSG3063200	5.46	0.0384024	up
HOVUSG3027300	-1.005	0.0125111	down				HOVUSG3897900	-1.352	0.0231421	down				HOVUSG3690700	-3.234	4.78065e-25	down				HOVUSG2810200	-1.426	0.00497859	down				HOVUSG3194500	2.921	0.0150533	up				HOVUSG3065300	7.469	1.69491e-05	up
HOVUSG3028500	1.682	1.66083e-13	up				HOVUSG3898700	-2.397	4.11189e-21	down				HOVUSG3691000	1.029	0.0107151	up				HOVUSG2810600	2.404	0.0100281	up				HOVUSG3194800	2.048	6.45532e-07	up				HOVUSG3065500	5.924	0.0410577	up
HOVUSG3036500	1.627	0.00726267	up				HOVUSG3899000	-3.664	2.02442e-11	down				HOVUSG3694200	-7.346	2.49076e-09	down				HOVUSG2815300	-1.762	8.04394e-07	down				HOVUSG3195400	-1.386	1.34718e-05	down				HOVUSG3068200	-1.822	1.54992e-05	down
HOVUSG3038000	5.633	0.0074856	up				HOVUSG3901500	6.466	0.00249599	up				HOVUSG3696100	-5.267	4.92952e-40	down				HOVUSG2818100	-3.136	0.0021775	down				HOVUSG3199600	1.733	0.000117847	up				HOVUSG3068400	-1.453	0.00348711	down
HOVUSG3038300	3.497	1.60581e-09	up				HOVUSG3909300	-1.043	0.00643364	down				HOVUSG3697500	1.17	4.94862e-08	up				HOVUSG2822800	4.393	1.49718e-07	up				HOVUSG3199700	1.758	5.18277e-08	up				HOVUSG3073200	-1.67	0.017233	down
HOVUSG3039700	-1.384	1.13162e-08	down				HOVUSG3909400	6.216	0.000719221	up				HOVUSG3704400	-1.422	0.00130312	down				HOVUSG2822900	3.514	0.00116297	up				HOVUSG3211800	10.82	2.05104e-16	up				HOVUSG3073800	-1.212	0.00140854	down
HOVUSG3040600	1.563	0.00131613	up				HOVUSG3909500	7.15	8.54812e-05	up				HOVUSG3713200	-6.198	5.79482e-06	down				HOVUSG2823100	-9.61	5.11889e-13	down				HOVUSG3212100	9.674	1.21373e-12	up				HOVUSG3076200	1.356	0.0046461	up
HOVUSG3040700	6.651	0.000356263	up				HOVUSG3918000	1.597	0.00368137	up				HOVUSG3718700	-1.197	0.0165408	down				HOVUSG2823400	-2.092	0.00393934	down				HOVUSG3213000	5.565	0.0277312	up				HOVUSG3079400	1.008	0.0247166	up
HOVUSG3042300	-2.049	3.05573e-06	down				HOVUSG3922000	2.258	9.3862e-12	up				HOVUSG3720900	1.658	0.0187049	up				HOVUSG2826900	-7.52	6.47017e-42	down				HOVUSG3213200	11.298	5.45344e-18	up				HOVUSG3084400	-2.26	0.000709824	down
HOVUSG3046800	1.847	3.12114e-08	up				HOVUSG3922600	5.107	2.71729e-05	up				HOVUSG3722300	1.123	0.000203324	up				HOVUSG2827400	-3.401	2.1593e-07	down				HOVUSG3222900	-5.842	0.0245916	down				HOVUSG3085200	8.658	9.90295e-09	up
HOVUSG3047300	-9.74	1.83304e-13	down				HOVUSG3927700	5.298	3.50463e-07	up				HOVUSG3723100	3.462	2.99615e-06	up				HOVUSG2829500	-1.63	0.00081709	down				HOVUSG3226800	1.902	0.00366258	up				HOVUSG3085300	6.53	0.00152045	up
HOVUSG3049200	3.703	0.00781192	up				HOVUSG3928000	-2.581	0.0264071	down				HOVUSG3723600	-9.45	6.11594e-12	down				HOVUSG2832900	-8.12	8.23681e-08	down				HOVUSG3228400	1.112	0.0375006	up				HOVUSG3085700	-1.31	2.97951e-05	down
HOVUSG3050600	-1.856	5.35487e-06	down				HOVUSG3929100	-4.491	0.0024126	down				HOVUSG3724800	-1.144	0.0421966	down				HOVUSG2833400	-1.393	4.86024e-11	down				HOVUSG3231200	4.154	0.00065153	up				HOVUSG3087000	-8.559	3.23485e-09	down
HOVUSG3053500	1.083	0.00275262	up				HOVUSG3931400	-5.588	0.000372814	down				HOVUSG3725600	7.611	8.16312e-05	up				HOVUSG2840200	-5.012	0.013537	down				HOVUSG3231300	5.557	0.0296659	up				HOVUSG3090500	-1.459	0.00685836	down
HOVUSG3055200	-5.749	3.61285e-12	down				HOVUSG3931800	8.275	6.28788e-08	up				HOVUSG3725900	5.521	8.5342e-10	up				HOVUSG2841100	3.815	0.0045915	up				HOVUSG3232900	1.008	0.00601076	up				HOVUSG3090700	1.581	0.0312269	up
HOVUSG3058600	5.715	0.00787337	up				HOVUSG3932200	2.566	0.0360126	up				HOVUSG3726300	1.279	0.0169821	up				HOVUSG2842800	4.362	0.00645477	up				HOVUSG3233400	1.098	0.0393102	up				HOVUSG3091100	-6.037	0.00917553	down
HOVUSG3061000	1.252	0.00257565	up				HOVUSG3933100	-1.59	0.00258858	down				HOVUSG3728800	1.803	9.84665e-05	up				HOVUSG2843100	1.79	1.60081e-07	up				HOVUSG3234200	-1.264	0.00388651	down				HOVUSG3091200	-4.956	0.000745937	down
HOVUSG3070300	-1.095	0.000296596	down				HOVUSG3933900	7.622	3.4189e-06	up				HOVUSG3731200	1.635	1.65841e-06	up				HOVUSG2843800	1.029	0.0042847	up				HOVUSG3237400	-9.984	2.14768e-13	down				HOVUSG3091300	-1.136	0.00562252	down
HOVUSG3073200	-1.048	0.0186408	down				HOVUSG3934400	-1.523	0.0327911	down				HOVUSG3735200	-8.388	6.23171e-09	down				HOVUSG2844100	1.057	0.00561978	up				HOVUSG3238300	-1.001	0.000887379	down				HOVUSG3091700	-8.801	6.7445e-10	down
HOVUSG3073800	-1.703	1.46144e-11	down				HOVUSG3937200	-1.617	0.0159292	down				HOVUSG3735400	-6.479	1.77616e-35	down				HOVUSG2848100	-7.807	2.29073e-07	down				HOVUSG3239800	1.548	3.36841e-05	up				HOVUSG3092100	5.919	0.00951296	up
HOVUSG3080700	-1.02	0.00459243	down				HOVUSG3937400	-1.648	4.70445e-05	down				HOVUSG3736300	-6.144	2.8161e-08	down				HOVUSG2849900	-1.082	0.0200214	down				HOVUSG3240300	1.393	0.018803	up				HOVUSG3093300	2.919	0.00272528	up
HOVUSG3082900	1.56	3.84166e-05	up				HOVUSG3937600	1.054	0.0326368	up				HOVUSG3737000	6.36	0.00178921	up				HOVUSG2850400	1.163	0.0491252	up				HOVUSG3240600	1.583	0.000329687	up				HOVUSG3094000	1.745	2.98734e-08	up
HOVUSG3084000	3.492	0.0289505	up				HOVUSG3938000	5.789	0.0247719	up				HOVUSG3739200	2.236	0.0038462	up				HOVUSG2858200	-6.142	0.00192699	down				HOVUSG3240900	-1.352	0.00218194	down				HOVUSG3095000	1.198	0.0314692	up
HOVUSG3086200	1.155	0.016989	up				HOVUSG3938600	-1.287	0.0161207	down				HOVUSG3744800	1.157	0.0191686	up				HOVUSG2859700	-3.814	0.000127254	down				HOVUSG3242300	3.644	1.74529e-12	up				HOVUSG3098700	1.352	9.55428e-08	up
HOVUSG3087000	-10.017	2.73002e-14	down				HOVUSG3938800	-5.518	0.0474796	down				HOVUSG3745400	-3.138	5.87569e-09	down				HOVUSG2860400	-1.889	0.00200508	down				HOVUSG3242400	-8.563	2.46567e-07	down				HOVUSG3101800	1.349	0.00118939	up
HOVUSG3087800	-1.228	0.0136106	down				HOVUSG3940700	1.523	0.00778257	up				HOVUSG3747900	3.791	0.0482397	up				HOVUSG2864800	-1.749	0.0463335	down				HOVUSG3253700	1.997	0.00928253	up				HOVUSG3102600	1.377	7.24118e-05	up
HOVUSG3091300	1.042	2.34431e-05	up				HOVUSG3945400	8.765	5.76031e-09	up				HOVUSG3756800	1.44	0.0168302	up				HOVUSG2868600	5.72	0.010183	up				HOVUSG3254500	3.457	1.12482e-20	up				HOVUSG3102700	-1.257	0.0069228	down
HOVUSG3092900	1	1.9426e-06	up				HOVUSG3946000	1.022	0.00334206	up				HOVUSG3757300	1.108	0.00178921	up				HOVUSG2874600	-2.799	0.0151693	down				HOVUSG3263900	-2.566	0.00262498	down				HOVUSG3106000	1.533	0.000205481	up
HOVUSG3094200	-2.224	0.0243385	down				HOVUSG3948500	2.928	1.94643e-09	up				HOVUSG3757500	1.146	0.000475016	up				HOVUSG2876600	2.45	3.19832e-07	up				HOVUSG3268300	1.591	0.00161756	up				HOVUSG3106900	7.158	3.97909e-05	up
HOVUSG3097100	1.547	0.0271182	up				HOVUSG3949100	11.51	2.83032e-18	up				HOVUSG3759000	3.468	1.06517e-16	up				HOVUSG2877500	6.613	6.12785e-05	up				HOVUSG3281400	1.489	0.000231114	up				HOVUSG3108000	2.851	6.08342e-05	up
HOVUSG3099600	-2.034	0.0247973	down				HOVUSG3949200	3.491	1.10137e-33	up				HOVUSG3760400	4.066	0.0171119	up				HOVUSG2878300	1.891	0.000230691	up				HOVUSG3282100	6.028	0.0101716	up				HOVUSG3108700	1.832	0.000279698	up
HOVUSG3103100	2.027	5.55858e-07	up				HOVUSG3951100	4.338	8.91421e-30	up				HOVUSG3762800	1.024	0.00151169	up				HOVUSG2879000	-4.135	0.0435405	down				HOVUSG3283800	-1.909	6.95901e-06	down				HOVUSG3110300	-2.485	0.00900024	down
HOVUSG3106400	-5.214	0.00623427	down				HOVUSG3952100	-2.291	0.00132597	down				HOVUSG3762900	1.033	0.00651079	up				HOVUSG2879400	2.097	0.0238888	up				HOVUSG3283900	-1.676	0.00362564	down				HOVUSG3110400	1.028	0.00764555	up
HOVUSG3106600	5.62	0.0156855	up				HOVUSG3955400	-1.477	7.52853e-05	down				HOVUSG3764300	-2.456	0.0480044	down				HOVUSG2880300	-1.4	0.0145905	down				HOVUSG3285500	1.945	0.00341393	up				HOVUSG3112000	2.849	0.0486564	up
HOVUSG3108700	1.939	0.00293378	up				HOVUSG3957500	-9.178	5.07663e-10	down				HOVUSG3765400	-6.847	0.00014468	down				HOVUSG2882600	1.136	2.80502e-05	up				HOVUSG3291200	-3.192	0.00188051	down				HOVUSG3112300	-1.104	0.00064265	down
HOVUSG3110400	-1.201	7.23456e-10	down				HOVUSG3958800	-1.099	0.0263828	down				HOVUSG3767600	2.633	9.49519e-13	up				HOVUSG2883300	-2.817	0.00487611	down				HOVUSG3296200	-1.439	0.0105078	down				HOVUSG3113900	-3.255	5.2896e-09	down
HOVUSG3111400	-3.069	1.69725e-09	down				HOVUSG3959300	-2.9	5.68173e-09	down				HOVUSG3774200	1.819	0.0263355	up				HOVUSG2888800	-3.313	0.0213509	down				HOVUSG3305700	1.536	0.00354324	up				HOVUSG3115700	-1.258	0.0254637	down
HOVUSG3111500	-1.804	0.000623761	down				HOVUSG3964800	-2.002	0.041299	down				HOVUSG3781400	-9.081	3.58914e-11	down				HOVUSG2889500	1.145	0.0202061	up				HOVUSG3306100	4.366	1.23236e-09	up				HOVUSG3121300	3.477	1.57193e-05	up
HOVUSG3113900	1.948	0.0140665	up				HOVUSG3965500	-1.602	0.000566409	down				HOVUSG3781500	1.056	0.000426624	up				HOVUSG2891100	-1.758	0.0300951	down				HOVUSG3306200	5.852	0.0228428	up				HOVUSG3121700	-4.146	1.27518e-08	down
HOVUSG3114600	1.003	6.32766e-05	up				HOVUSG3966400	1.698	0.0135034	up				HOVUSG3782000	4.138	0.000122282	up				HOVUSG2895000	1.506	0.0038239	up				HOVUSG3306400	-1.104	0.000542223	down				HOVUSG3127100	-7.376	9.09841e-06	down
HOVUSG3121300	6.041	2.01119e-08	up				HOVUSG3972700	-1.183	0.00215104	down				HOVUSG3783600	-1.716	1.27685e-05	down				HOVUSG2901000	-1.547	0.0248548	down				HOVUSG3308700	-8	3.60889e-07	down				HOVUSG3128100	-1.514	0.0409145	down
HOVUSG3122000	1.24	3.55119e-05	up				HOVUSG3981000	1.382	0.017046	up				HOVUSG3794100	-1.276	0.000400379	down				HOVUSG2901400	-1.464	0.00216934	down				HOVUSG3309100	-3.985	2.82776e-25	down				HOVUSG3128200	3.008	0.00210808	up
HOVUSG3123300	-5.672	0.0100845	down				HOVUSG3988400	-1.208	0.0328354	down				HOVUSG3805000	10.785	1.33032e-16	up				HOVUSG2906300	-1.155	5.71933e-10	down				HOVUSG3311700	-6.066	0.00788329	down				HOVUSG3130100	2.09	0.000974047	up
HOVUSG3124100	-1.059	3.16349e-08	down				HOVUSG3991900	-2.587	0.000827788	down				HOVUSG3807000	-2.715	0.0142532	down				HOVUSG2911800	-3.773	0.00497859	down				HOVUSG3312500	-1.861	0.000938686	down				HOVUSG3135000	2.146	0.010355	up
HOVUSG3125700	-2.559	0.00759617	down				HOVUSG3994600	-1.049	0.0396217	down				HOVUSG3808200	1.491	0.0173975	up				HOVUSG2917300	-1.661	1.87682e-05	down				HOVUSG3315500	-1.743	0.0139394	down				HOVUSG3139500	1.116	0.000407153	up
HOVUSG3125900	-6.285	1.16165e-10	down				HOVUSG3995000	-1.815	0.0203038	down				HOVUSG3808300	-1.365	0.000194377	down				HOVUSG2917900	-1.126	0.000109155	down				HOVUSG3316800	-2.683	0.000990237	down				HOVUSG3140900	1.066	0.00827813	up
HOVUSG3126400	-2.402	0.00721085	down				HOVUSG3998400	-3.658	0.00425685	down				HOVUSG3814500	1.387	0.00218177	up				HOVUSG2920500	-1.661	5.9249e-12	down				HOVUSG3320800	1.145	0.0236855	up				HOVUSG3143100	9.403	6.65139e-12	up
HOVUSG3128400	-4.003	5.2154e-10	down				HOVUSG4014000	-1.164	3.06124e-05	down				HOVUSG3814600	1.021	0.003658	up				HOVUSG2931300	1.521	0.000519769	up				HOVUSG3324300	8.477	1.33797e-08	up				HOVUSG3145300	-1.455	1.9614e-09	down
HOVUSG3129000	5.525	0.00313019	up				HOVUSG4019800	8.064	1.94577e-07	up				HOVUSG3815200	5.116	0.0211828	up				HOVUSG2932100	2.176	0.0371078	up				HOVUSG3329100	-4.471	0.0415315	down				HOVUSG3147100	5.371	5.7269e-11	up
HOVUSG3129200	5.37	0.0394784	up				HOVUSG4024600	1.425	0.0180255	up				HOVUSG3815900	-2.359	7.853e-13	down				HOVUSG2932200	-1.483	0.00122317	down				HOVUSG3330900	1.263	0.0442262	up				HOVUSG3150900	1.711	1.62189e-05	up
HOVUSG3129800	-2.013	0.0304415	down				HOVUSG4033000	2.432	1.47601e-10	up				HOVUSG3816500	2.577	0.00441211	up				HOVUSG2943900	-1.986	0.000282903	down				HOVUSG3332000	-4.396	4.79314e-18	down				HOVUSG3152700	-1.572	0.0206288	down
HOVUSG3130700	4.554	0.00041768	up				HOVUSG4033500	13.999	1.12114e-26	up				HOVUSG3816600	2.086	7.17839e-05	up				HOVUSG2944800	2.002	0.000260391	up				HOVUSG3332900	-7.74	8.12567e-06	down				HOVUSG3153600	2.534	0.00102142	up
HOVUSG3135000	-1.796	3.82381e-06	down				HOVUSG4035000	6.848	0.000584639	up				HOVUSG3825800	1.508	0.00321648	up				HOVUSG2949000	1.199	7.88528e-05	up				HOVUSG3333100	-8.572	4.75429e-09	down				HOVUSG3156000	6.886	8.69288e-05	up
HOVUSG3140400	-2.339	0.0431476	down				HOVUSG4035100	-11.09	1.24652e-21	down				HOVUSG3825900	1.062	0.00424686	up				HOVUSG2949600	2.925	0.0321044	up				HOVUSG3333200	-9.14	0.000759913	down				HOVUSG3156300	2.532	0.00269502	up
HOVUSG3143100	9.81	3.71475e-13	up				HOVUSG4036100	-1.533	7.21621e-09	down				HOVUSG3830500	-3.264	9.54953e-14	down				HOVUSG2949700	-4.845	0.00427594	down				HOVUSG3334100	-3.507	1.4545e-12	down				HOVUSG3156600	1.616	0.00111061	up
HOVUSG3148000	2.511	0.000124282	up				HOVUSG4054500	-1.082	0.0394091	down				HOVUSG3837900	1.384	8.65056e-06	up				HOVUSG2949800	-2.371	1.55602e-16	down				HOVUSG3334500	-5.276	6.92579e-06	down				HOVUSG3157500	1.196	0.03821	up
HOVUSG3150700	-1.034	4.35943e-05	down				HOVUSG4056100	4.012	3.44366e-18	up				HOVUSG3838000	1.384	7.21019e-05	up				HOVUSG2951300	4.932	4.94755e-08	up				HOVUSG3335300	-1.516	0.0428419	down				HOVUSG3159300	2.66	0.0197046	up
HOVUSG3152700	-1.019	0.0069032	down				HOVUSG4056200	4.642	0.00073196	up				HOVUSG3838200	1.178	0.00508503	up				HOVUSG2951400	-1.652	2.57915e-11	down				HOVUSG3337700	6.378	0.00144578	up				HOVUSG3166100	5.383	0.0450086	up
HOVUSG3157500	1.42	0.024865	up				HOVUSG4071800	1.889	0.000372814	up				HOVUSG3838500	1.412	2.53373e-06	up				HOVUSG2951500	-1.789	1.4895e-11	down				HOVUSG3340100	3.243	0.000788097	up				HOVUSG3171300	12.416	2.63939e-22	up
HOVUSG3161300	-1.235	0.000926264	down				HOVUSG4074700	-7.652	2.09296e-06	down				HOVUSG3839400	-1.525	1.9715e-07	down				HOVUSG2951700	7.97	7.29522e-08	up				HOVUSG3341000	1.148	0.00252192	up				HOVUSG3171400	1.077	0.000409167	up
HOVUSG3163900	2.597	7.98063e-06	up				HOVUSG4074800	-10.483	4.05549e-15	down				HOVUSG3846800	1.434	0.000357182	up				HOVUSG2952500	1.423	1.45169e-05	up				HOVUSG3345100	8.668	2.46316e-28	up				HOVUSG3171700	8.214	1.65963e-17	up
HOVUSG3164900	1.018	0.00954129	up				HOVUSG4088100	-2.198	0.0127633	down				HOVUSG3846900	5.411	0.0108559	up				HOVUSG2955500	-1.188	0.000949626	down				HOVUSG3347600	1.484	0.00312974	up				HOVUSG3171800	5.594	0.0199626	up
HOVUSG3171200	1.03	0.000899944	up				HOVUSG4088200	-7.414	2.02663e-05	down				HOVUSG3850000	-1.331	2.81195e-09	down				HOVUSG2957800	-1.071	0.0126238	down				HOVUSG3347900	1.878	6.35364e-07	up				HOVUSG3172200	3.623	1.7297e-19	up
HOVUSG3177800	1.095	0.00382049	up				HOVUSG4092400	-9.675	1.29421e-12	down				HOVUSG3850700	-7.055	3.86676e-05	down				HOVUSG2960400	-8.341	6.00422e-09	down				HOVUSG3350800	2.149	0.0499939	up				HOVUSG3177800	7.101	4.67445e-05	up
HOVUSG3179100	4.569	0.0108999	up				HOVUSG4092700	1.168	0.0345034	up				HOVUSG3850800	-8.791	1.66963e-09	down				HOVUSG2961200	-1.303	5.81651e-06	down				HOVUSG3351900	-7.14	7.67999e-05	down				HOVUSG3178200	1.765	0.00236718	up
HOVUSG3181100	1.792	0.00238496	up				HOVUSG4099000	-2.16	0.00114017	down				HOVUSG3850900	-6.408	4.68623e-06	down				HOVUSG2961300	2.207	0.0139988	up				HOVUSG3353000	1.18	0.0436134	up				HOVUSG3179200	-1.138	2.03641e-05	down
HOVUSG3184800	-8.092	5.78884e-08	down				HOVUSG4100400	3.055	0.0254768	up				HOVUSG3851000	-7.52	1.06474e-09	down				HOVUSG2961600	1.766	7.40368e-12	up				HOVUSG3355500	-5.875	0.0165756	down				HOVUSG3184800	-9.253	2.6261e-11	down
HOVUSG3184900	-7.764	1.59659e-07	down				HOVUSG4106800	1.971	0.00543314	up				HOVUSG3864400	5.434	0.0403816	up				HOVUSG2965300	1.025	0.000424013	up				HOVUSG3377500	2.423	0.000172993	up				HOVUSG3185500	-1.557	0.0407397	down
HOVUSG3185000	-7.028	1.55937e-05	down				HOVUSG4107100	-1.334	0.0338937	down				HOVUSG3873200	1.452	0.000254628	up				HOVUSG2967500	-1.674	0.0188866	down				HOVUSG3381800	1.602	0.00105796	up				HOVUSG3186200	-6.261	0.00309502	down
HOVUSG3185500	-2.28	1.8187e-09	down				HOVUSG4107300	-5.599	0.000576766	down				HOVUSG3874700	1.133	0.000107175	up				HOVUSG2969800	1.019	0.0271442	up				HOVUSG3383300	-9.399	2.44251e-11	down				HOVUSG3186300	-9.582	2.87602e-12	down
HOVUSG3186200	-8.584	2.03548e-09	down				HOVUSG4107500	-1.196	0.000604736	down				HOVUSG3877200	4.579	0.00494638	up				HOVUSG2971500	1.993	0.0273445	up				HOVUSG3383400	-8.201	6.25088e-08	down				HOVUSG3186700	-1.077	0.0491328	down
HOVUSG3186300	-9.482	1.71771e-12	down				HOVUSG4108400	-2.032	0.0104043	down				HOVUSG3879700	-2.76	7.4295e-07	down				HOVUSG2971900	3.15	0.00538041	up				HOVUSG3383700	-1.404	0.000301994	down				HOVUSG3191300	3.273	0.0303574	up
HOVUSG3187200	1.006	0.0159614	up				HOVUSG4110300	-5.771	2.40962e-08	down				HOVUSG3880900	1.076	5.04782e-06	up				HOVUSG2978600	4.512	8.4985e-20	up				HOVUSG3384300	-1.205	0.0158015	down				HOVUSG3194800	1.073	0.00925864	up
HOVUSG3190200	-6.438	0.00445096	down				HOVUSG4112800	-1.262	0.000144434	down				HOVUSG3885700	-1.182	0.00723092	down				HOVUSG2978700	3.538	1.33608e-36	up				HOVUSG3386100	6.558	5.91875e-05	up				HOVUSG3195100	1.012	0.010355	up
HOVUSG3191600	1.546	3.25524e-06	up				HOVUSG4114100	2.013	0.0278926	up				HOVUSG3888800	-2.356	0.0135578	down				HOVUSG2979500	-1.577	3.57973e-15	down				HOVUSG3386600	3.153	0.000172516	up				HOVUSG3195400	-1.409	8.56378e-06	down
HOVUSG3191800	1.131	4.73838e-06	up				HOVUSG4114900	-2.431	0.00105179	down				HOVUSG3889500	4.098	1.05881e-08	up				HOVUSG2979900	-1.029	0.0157072	down				HOVUSG3389200	-3.54	0.0274204	down				HOVUSG3201300	1.499	0.0236867	up
HOVUSG3192400	-1.141	0.00696893	down				HOVUSG4117300	-3.352	0.00153651	down				HOVUSG3890300	3.428	3.63769e-08	up				HOVUSG2980300	3.022	2.08965e-05	up				HOVUSG3390600	-2.295	0.00304104	down				HOVUSG3203900	-5.976	0.00734827	down
HOVUSG3192600	2.126	0.00183827	up				HOVUSG4118000	2.688	0.0145772	up				HOVUSG3891800	-1.872	8.58621e-09	down				HOVUSG2981900	-6.007	0.00431555	down				HOVUSG3394400	-2.417	0.0100543	down				HOVUSG3211800	11.113	1.3751e-17	up
HOVUSG3194800	1.715	6.34482e-05	up				HOVUSG4118100	4.546	0.000124795	up				HOVUSG3898200	1.202	0.011999	up				HOVUSG2982500	1.033	0.0181169	up				HOVUSG3397700	-6.054	0.00148697	down				HOVUSG3212100	11.513	5.18062e-18	up
HOVUSG3200700	-1.316	1.28236e-08	down				HOVUSG4118400	3.078	4.34097e-11	up				HOVUSG3898400	4.269	5.73279e-07	up				HOVUSG2983600	3.7	8.32341e-09	up				HOVUSG3398000	-4.674	2.21214e-06	down				HOVUSG3213000	5.794	0.0105776	up
HOVUSG3201100	-1.881	4.45418e-08	down				HOVUSG4120700	-8.926	3.46913e-10	down				HOVUSG3909300	1.016	0.00535152	up				HOVUSG2984400	-5.51	4.77869e-09	down				HOVUSG3403100	2.014	0.00666051	up				HOVUSG3213200	11.399	1.3675e-18	up
HOVUSG3202900	-1.1	0.00187441	down				HOVUSG4127000	1.372	0.0168658	up				HOVUSG3911500	3.268	8.9062e-05	up				HOVUSG2985000	-1.682	2.35983e-08	down				HOVUSG3403900	7.106	5.6119e-05	up				HOVUSG3213900	-2.789	0.0143144	down
HOVUSG3206800	-1.622	0.0117387	down				HOVUSG4127200	-1.913	0.0120996	down				HOVUSG3914700	-2.77	9.3504e-05	down				HOVUSG2985900	-2.592	1.68778e-08	down				HOVUSG3404600	-1.596	7.917e-06	down				HOVUSG3215600	1.614	7.46924e-07	up
HOVUSG3211800	11.351	2.98173e-18	up				HOVUSG4129100	1.371	0.0210683	up				HOVUSG3916800	1.445	0.0338788	up				HOVUSG2987700	3.425	4.21435e-11	up				HOVUSG3411500	-1.927	0.000301767	down				HOVUSG3228500	-1.674	2.49121e-06	down
HOVUSG3212100	6.339	0.000802415	up				HOVUSG4129200	1.658	0.0101625	up				HOVUSG3921100	-1.604	0.00706477	down				HOVUSG2988400	-8.066	3.24203e-08	down				HOVUSG3412600	3.031	5.89294e-06	up				HOVUSG3228700	-1.098	0.000657773	down
HOVUSG3213000	5.638	0.0245642	up				HOVUSG4129900	-2.263	0.000966284	down				HOVUSG3927700	3.714	0.00011859	up				HOVUSG2990400	-1.04	1.35695e-05	down				HOVUSG3414800	4.612	6.86405e-10	up				HOVUSG3229800	1.034	0.0123745	up
HOVUSG3213200	10.79	9.41962e-17	up				HOVUSG4130200	-1.139	0.0440292	down				HOVUSG3930000	1.225	6.05018e-08	up				HOVUSG2994700	-1.347	1.31057e-08	down				HOVUSG3415400	1.992	0.0249843	up				HOVUSG3239800	1.373	0.000393622	up
HOVUSG3213600	6.005	0.00553828	up				HOVUSG4133300	8.011	1.02323e-06	up				HOVUSG3930100	2.965	3.20665e-12	up				HOVUSG2994900	-1.625	0.0477658	down				HOVUSG3417900	-1.25	0.0375677	down				HOVUSG3240600	1.537	0.000503519	up
HOVUSG3215600	-1.689	0.0260896	down				HOVUSG4134000	5.621	3.79084e-12	up				HOVUSG3930200	1.14	0.00658275	up				HOVUSG2996200	2.482	1.54732e-06	up				HOVUSG3423400	-1.45	0.00750985	down				HOVUSG3240900	-1.865	1.7444e-08	down
HOVUSG3217800	1.642	7.0371e-05	up				HOVUSG4135300	1.754	1.79595e-06	up				HOVUSG3931800	7.681	1.04717e-06	up				HOVUSG3000900	1.779	0.00186216	up				HOVUSG3423700	-1.745	4.75429e-09	down				HOVUSG3241900	2.862	0.00605591	up
HOVUSG3225600	1.05	0.0121014	up				HOVUSG4136000	5.044	0.0247367	up				HOVUSG3932000	4.6	8.3288e-17	up				HOVUSG3001100	2.579	0.0226295	up				HOVUSG3424000	6.364	0.00133437	up				HOVUSG3242300	2.768	2.94384e-06	up
HOVUSG3226700	4.251	0.00822468	up				HOVUSG4137400	-3.171	0.000784259	down				HOVUSG3932800	2.014	3.61985e-11	up				HOVUSG3005300	1.263	0.0163495	up				HOVUSG3425400	5.844	0.0136458	up				HOVUSG3252900	1.043	0.00798893	up
HOVUSG3227300	-3.039	5.78578e-05	down				HOVUSG4140700	-2.009	0.000891668	down				HOVUSG3933900	5.419	0.0402627	up				HOVUSG3005700	-7.203	1.91094e-05	down				HOVUSG3427700	1.36	0.00640929	up				HOVUSG3253700	2.903	1.46012e-05	up
HOVUSG3227600	-1.942	7.51666e-16	down				HOVUSG4149400	-8.943	6.46815e-10	down				HOVUSG3934500	5.455	2.99354e-13	up				HOVUSG3007600	1.673	1.25936e-05	up				HOVUSG3431100	-1.293	0.000552281	down				HOVUSG3254500	1.627	0.000223465	up
HOVUSG3228500	-1.662	0.000133257	down				HOVUSG4149900	4.004	0.0170475	up				HOVUSG3937200	1.322	0.0409333	up				HOVUSG3008800	-1.13	0.0251505	down				HOVUSG3433700	-1.388	0.0141782	down				HOVUSG3263300	2.998	0.00424942	up
HOVUSG3228800	-1.007	3.14497e-05	down				HOVUSG4150900	-1.613	1.65726e-05	down				HOVUSG3937400	1.718	0.00351991	up				HOVUSG3018800	2.462	0.0481837	up				HOVUSG3436900	1.843	0.000241602	up				HOVUSG3263900	-1.788	0.00897775	down
HOVUSG3229300	-1.064	0.010305	down				HOVUSG4152500	-4.375	0.00341426	down				HOVUSG3937800	7.409	7.48635e-06	up				HOVUSG3019200	1.623	0.00681124	up				HOVUSG3441900	1.241	0.0309819	up				HOVUSG3270500	-2.12	0.00970614	down
HOVUSG3230200	-1.036	0.00351604	down				HOVUSG4152900	-4.764	7.52165e-20	down				HOVUSG3945400	7.195	1.84416e-05	up				HOVUSG3024300	1.098	0.000224355	up				HOVUSG3442800	1.057	0.00896318	up				HOVUSG3271800	-3.057	0.0180204	down
HOVUSG3230500	-10.889	1.31412e-16	down				HOVUSG4156100	-1.03	0.0231752	down				HOVUSG3946000	-1.565	2.73626e-08	down				HOVUSG3024900	-1.018	0.00599646	down				HOVUSG3446400	-1.119	0.00350778	down				HOVUSG3272300	1.267	0.0388244	up
HOVUSG3236800	-2.437	0.0313434	down				HOVUSG4157200	8.979	2.4198e-10	up				HOVUSG3957600	1.726	0.00187006	up				HOVUSG3025600	1.018	1.48839e-08	up				HOVUSG3450300	1.732	0.0115544	up				HOVUSG3279000	1.034	0.000105751	up
HOVUSG3237400	-9.884	7.43496e-14	down				HOVUSG4163900	-1.808	0.00050851	down				HOVUSG3959300	-2.715	3.88237e-09	down				HOVUSG3040300	-1.561	0.00465827	down				HOVUSG3450400	-11.666	3.50479e-19	down				HOVUSG3279700	-3.4	2.25508e-10	down
HOVUSG3240500	1.555	8.32868e-16	up				HOVUSG4165700	3.241	8.92792e-05	up				HOVUSG3963000	1.013	0.000135712	up				HOVUSG3040600	4.291	4.47508e-26	up				HOVUSG3450500	6.604	0.000606918	up				HOVUSG3280100	-1.703	0.00105185	down
HOVUSG3240900	-4.286	0.00407739	down				HOVUSG4175200	5.265	0.00402522	up				HOVUSG3965500	1.095	0.0146163	up				HOVUSG3040900	-1.17	0.00142736	down				HOVUSG3451200	3.042	0.00333179	up				HOVUSG3281400	1.616	2.58901e-06	up
HOVUSG3241200	6.85	4.85144e-05	up				HOVUSG4178200	4.723	0.0135585	up				HOVUSG3976300	1.422	0.0242689	up				HOVUSG3041500	1.406	0.000363216	up				HOVUSG3451300	-5.26	0.000184675	down				HOVUSG3282100	5.561	0.0352458	up
HOVUSG3241800	-5.759	0.00553905	down				HOVUSG4182200	-3.426	6.07728e-05	down				HOVUSG3977900	-2.412	2.99901e-06	down				HOVUSG3048400	-1.88	0.00208868	down				HOVUSG3452500	-1.964	3.4538e-05	down				HOVUSG3282900	11.398	1.4346e-18	up
HOVUSG3242300	5.182	2.10864e-15	up				HOVUSG4183600	1.724	0.0305257	up				HOVUSG3983100	1.089	0.00355543	up				HOVUSG3049400	-1.049	0.00568264	down				HOVUSG3454700	3.927	0.0417559	up				HOVUSG3283700	-1.187	0.00219402	down
HOVUSG3252200	-1.723	0.00085277	down				HOVUSG4187100	-7.103	1.78101e-10	down				HOVUSG3984500	-1.341	0.000120167	down				HOVUSG3053000	1.797	0.00235737	up				HOVUSG3459800	1.973	0.00903849	up				HOVUSG3283800	-2.193	0.0002835	down
HOVUSG3260400	-1.336	0.0281755	down				HOVUSG4189800	1.079	0.0403833	up				HOVUSG3984600	-1.102	0.034745	down				HOVUSG3055500	-2.489	0.00182846	down				HOVUSG3467400	-1.503	0.00126534	down				HOVUSG3283900	-2.335	4.76576e-08	down
HOVUSG3261200	-1.049	0.0165613	down				HOVUSG4197500	-2.171	0.0147333	down				HOVUSG3988500	1.724	0.0028046	up				HOVUSG3062600	-1.481	0.00665835	down				HOVUSG3470200	3.915	0.0302589	up				HOVUSG3287900	1.231	0.0178601	up
HOVUSG3266400	5.554	0.00194839	up				HOVUSG4198000	5.238	0.0386241	up				HOVUSG3990000	-6.781	0.000108946	down				HOVUSG3070000	-1.139	0.00776305	down				HOVUSG3471200	1.921	0.00281513	up				HOVUSG3291200	-2.349	8.15797e-06	down
HOVUSG3270600	2.673	0.0010921	up				HOVUSG4200900	-1.204	0.0436007	down				HOVUSG3993500	2.648	5.41352e-05	up				HOVUSG3073800	-1.171	0.000172642	down				HOVUSG3472200	1.424	0.00499035	up				HOVUSG3293100	-1.48	3.40793e-05	down
HOVUSG3272700	1.586	0.00563832	up				HOVUSG4208900	-2.033	0.0297504	down				HOVUSG4000300	1.22	0.0380653	up				HOVUSG3074300	-1.16	2.20362e-08	down				HOVUSG3473200	2.041	3.01559e-08	up				HOVUSG3295400	-2.244	0.0462652	down
HOVUSG3276100	1.252	0.00328651	up				HOVUSG4209600	-3.499	0.0207805	down				HOVUSG4008300	-7.466	1.29434e-09	down				HOVUSG3078100	1.013	2.03921e-05	up				HOVUSG3477400	-7.116	0.000111334	down				HOVUSG3296200	-1.277	0.00229253	down
HOVUSG3278200	-3.248	0.00132357	down				HOVUSG4210500	-1.119	0.0066931	down				HOVUSG4012200	1.301	0.00973555	up				HOVUSG3082000	-1.473	0.000554889	down				HOVUSG3478400	1.048	0.0428382	up				HOVUSG3299900	-3.71	2.01685e-10	down
HOVUSG3280700	5.497	0.0379673	up				HOVUSG4212500	-7.791	2.91791e-41	down				HOVUSG4012400	1.597	0.00183073	up				HOVUSG3084400	-1.073	0.0373688	down				HOVUSG3481700	-1.35	0.0436134	down				HOVUSG3303900	-2.127	0.0430575	down
HOVUSG3283800	1.677	0.0428058	up				HOVUSG4212800	-1.778	6.07157e-05	down				HOVUSG4012600	1.241	0.0394325	up				HOVUSG3084800	-1.956	3.10183e-05	down				HOVUSG3488700	2.183	3.97469e-07	up				HOVUSG3305800	-1.389	0.000164223	down
[truncated: 1,623 more rows]

## Sheet: Supplementary Table 7
Supplementary Table 7. Summary of coexpression gene clusters associated with metabolites (r ≥ 0.6) .
[truncated: 12,307 more rows]

[truncated: 4 more sheets: Supplementary Table 8, Supplementary Table 9, Supplementary Table 10, Supplementary Table 11]
